# Supplementary material for: Multiomics analysis reveals the presence of a microbiome in the gut of fetal lambs
Source: HighWire-hosted journal article supplement (doi:10.1136/gutjnl-2020-320951), 2021-02-15
Supplement: gutjnl-2020-320951supp002_data_supplement.xlsx [file gutjnl-2020-320951supp002_data_supplement.xlsx]

## Sheet: Contents
Supplementary Table S1	The unique genes in cecal content samples in metagenomic dataset
Supplementary Table S2	The shared genes between cecal content samples and negative control in metagenomic dataset
Supplementary Table S3	The unique genes in cecal content samples in metatranscriptomic dataset
Supplementary Table S4	The shared genes between cecal content samples and negative control in metatranscriptomic dataset
Supplementary Table S5	Gut microbial metagenomic reference gene catalog
Supplementary Table S6	Gut microbial metatranscriptomic reference gene catalog
Supplementary Table S7	Microbial composition of metagenome in fetal gut
Supplementary Table S8	Antibiotic resistance genes detected in fetal gut
Supplementary Table S9	Microbial composition of metatranscriptome in fetal gut
Supplementary Table S10	The concentration of SCFAs in the fetal cecal content and umbilical cord blood samples
Supplementary Table S11	Metabolites in positive ion mode in the fetal cecal content samples
Supplementary Table S12	Metabolites in negative ion mode in the fetal cecal content samples
Supplementary Table S13	The host-related KEGG pathways in the fetal cecal content samples
Supplementary Table S14	The non-host related KEGG pathways in the fetal cecal content samples
Supplementary Table S15	Metabolites in positive ion mode in umbilical cord blood samples
Supplementary Table S16	Metabolites in negative ion mode in umbilical cord blood samples
Supplementary Table S17	KEGG pathways of metagenome
Supplementary Table S18	KEGG pathways of metatranscriptome
Supplementary Table S19	Specific primers used in qPCR

## Sheet: Supplementary Table S1
Supplementary Table S1 The unique genes in cecal content samples in metagenomic dataset
gene id	P	N	C1	C2	C3	C4	C5	C6
k141_1000_1	0	0	0	0	0	2	0	0
k141_100006_1	0	0	0	0	0	2	0	0
k141_100011_1	0	0	0	0	0	0	2	0
k141_100027_2	0	0	0	4	0	0	0	0
k141_100040_1	0	0	2	0	0	0	0	0
k141_100051_2	0	0	0	2	0	0	0	0
k141_100142_2	0	0	0	22	0	0	0	0
k141_100143_1	0	0	0	8	0	0	0	0
k141_100153_2	0	0	0	16	0	0	0	0
k141_100162_1	0	0	0	18	0	0	0	0
k141_100203_3	0	0	0	0	2	0	0	0
k141_10023_1	0	0	0	8	0	0	0	0
k141_100242_1	0	0	0	0	4	0	0	0
k141_100266_1	0	0	0	0	0	4	0	0
k141_100282_1	0	0	0	2	0	0	0	0
k141_100282_2	0	0	0	10	0	0	0	0
k141_100297_2	0	0	0	8	0	0	0	0
k141_100297_3	0	0	0	4	0	0	0	0
k141_100318_1	0	0	0	26	0	0	0	0
k141_10032_3	0	0	0	2	0	0	0	0
k141_100335_1	0	0	0	12	0	0	0	0
k141_100381_1	0	0	0	0	0	0	2	0
k141_100410_1	0	0	0	14	0	0	0	0
k141_100438_1	0	0	0	6	0	0	0	0
k141_100443_2	0	0	0	0	4	0	0	0
k141_100448_1	0	0	0	22	0	0	0	0
k141_100448_2	0	0	0	2	0	0	0	0
k141_100458_1	0	0	0	0	2	0	0	0
k141_100469_1	0	0	0	0	0	2	0	0
k141_100504_2	0	0	0	12	0	0	0	0
k141_100506_1	0	0	0	16	0	0	0	0
k141_100519_1	0	0	0	0	0	2	0	0
k141_10053_1	0	0	0	4	0	0	0	0
k141_10053_2	0	0	0	2	0	0	0	0
k141_100535_1	0	0	0	6	0	0	0	0
k141_100573_1	0	0	0	32	0	0	0	0
k141_100585_1	0	0	2	0	0	0	0	0
k141_100629_1	0	0	0	0	0	2	0	0
k141_100637_1	0	0	0	0	0	0	2	0
k141_100646_1	0	0	0	4	0	0	0	0
k141_100648_3	0	0	0	12	0	0	0	0
k141_100649_1	0	0	6	0	0	0	0	0
k141_100687_1	0	0	0	0	0	2	0	0
k141_100692_2	0	0	0	0	2	0	0	0
k141_100693_1	0	0	0	0	0	0	4	0
k141_100699_1	0	0	0	14	0	0	0	0
k141_100699_2	0	0	0	8	0	0	0	0
k141_10071_1	0	0	0	0	0	2	0	0
k141_100749_1	0	0	0	0	0	4	0	0
k141_100753_1	0	0	0	14	0	0	0	0
k141_100753_2	0	0	0	4	0	0	0	0
k141_100758_2	0	0	0	6	0	0	0	0
k141_100777_2	0	0	0	0	0	0	4	0
k141_100800_1	0	0	0	2	0	0	0	0
k141_100804_1	0	0	0	34	0	0	0	0
k141_100807_2	0	0	0	2	0	0	0	0
k141_100815_1	0	0	0	34	0	0	0	0
k141_100830_1	0	0	0	6	0	0	0	0
k141_10084_2	0	0	0	10	0	0	0	0
k141_100844_1	0	0	0	6	0	0	0	0
k141_100847_3	0	0	0	0	0	2	0	0
k141_100849_1	0	0	0	0	0	0	2	0
k141_100877_1	0	0	0	4	0	0	0	0
k141_100897_1	0	0	0	22	0	0	0	0
k141_100899_1	0	0	0	0	0	0	2	0
k141_100902_1	0	0	0	16	0	0	0	0
k141_100945_1	0	0	0	8	0	0	0	0
k141_100964_1	0	0	0	16	0	0	0	0
k141_100978_1	0	0	0	0	0	2	0	0
k141_101010_1	0	0	0	14	0	0	0	0
k141_101047_1	0	0	0	26	0	0	0	0
k141_101047_2	0	0	0	6	0	0	0	0
k141_101055_1	0	0	0	0	0	2	0	0
k141_101059_1	0	0	0	14	0	0	0	0
k141_101060_1	0	0	0	0	2	0	0	0
k141_101090_1	0	0	0	0	2	0	0	0
k141_101093_1	0	0	0	2	0	0	0	0
k141_1011_1	0	0	0	0	0	0	2	0
k141_101108_1	0	0	0	18	0	0	0	0
k141_101144_1	0	0	0	0	0	2	0	0
k141_101172_1	0	0	0	2	0	0	0	0
k141_101178_1	0	0	0	0	0	2	0	0
k141_101222_1	1078	0	2	0	0	0	0	0
k141_101222_3	2290	0	2	0	0	0	0	0
k141_101222_4	5884	0	0	0	0	2	0	0
k141_101237_1	0	0	0	12	0	0	0	0
k141_101242_1	0	0	2	0	0	0	0	0
k141_101276_1	0	0	0	0	4	0	0	0
k141_10128_1	2	0	2	0	0	0	0	0
k141_101291_2	0	0	0	0	0	2	0	0
k141_101320_1	0	0	0	6	0	0	0	0
k141_101320_2	0	0	0	2	0	0	0	0
k141_101320_3	0	0	0	4	0	0	0	0
k141_101332_2	0	0	0	0	0	0	0	2
k141_101353_2	0	0	0	0	0	0	2	0
k141_101377_1	0	0	0	4	0	0	0	0
k141_101388_1	0	0	0	0	2	0	0	0
k141_101392_1	0	0	0	0	4	0	0	0
k141_101411_1	0	0	0	12	0	0	0	0
k141_101413_1	0	0	0	16	0	0	0	0
k141_101435_1	0	0	0	0	0	2	0	0
k141_101441_1	0	0	0	14	0	0	0	0
k141_101459_1	0	0	0	8	0	0	0	0
k141_101464_1	0	0	0	22	0	0	0	0
k141_101468_1	0	0	0	0	0	0	0	4
k141_101475_1	0	0	0	2	0	0	0	0
k141_101496_1	0	0	0	2	0	0	0	0
k141_10151_1	0	0	0	4	0	0	0	0
k141_101516_2	0	0	0	0	0	0	2	0
k141_101519_2	0	0	0	16	0	0	0	0
k141_101526_1	0	0	0	10	0	0	0	0
k141_101554_1	0	0	0	0	0	0	0	2
k141_101562_2	0	0	0	0	0	2	0	0
k141_101575_19	194	0	0	2	0	0	0	0
k141_101575_27	2480	0	0	0	2	0	0	0
k141_101575_29	3810	0	0	8	0	0	0	0
k141_101575_32	10242	0	0	2	0	0	0	0
k141_101578_1	0	0	0	6	0	0	0	0
k141_101613_1	0	0	0	26	0	0	0	0
k141_101627_1	2	0	2	0	0	0	0	0
k141_101631_1	0	0	0	0	0	2	0	0
k141_101645_1	0	0	0	20	0	0	0	0
k141_101646_1	0	0	0	0	0	0	0	4
k141_101667_1	0	0	0	2	0	0	0	0
k141_101692_1	0	0	0	16	0	0	0	0
k141_101702_1	0	0	0	30	0	0	0	0
k141_101704_1	0	0	0	26	0	0	0	0
k141_101704_2	0	0	0	20	0	0	0	0
k141_101711_1	0	0	0	2	0	0	0	0
k141_101727_1	0	0	0	12	0	0	0	0
k141_101729_1	0	0	8	0	0	0	0	0
k141_101729_2	0	0	0	0	4	0	0	0
k141_101736_1	0	0	0	18	0	0	0	0
k141_101739_2	0	0	0	0	2	0	0	0
k141_101744_1	0	0	0	10	0	0	0	0
k141_101777_2	0	0	0	16	0	0	0	0
k141_101792_1	0	0	0	14	0	0	0	0
k141_101808_2	0	0	0	2	0	0	0	0
k141_101816_1	0	0	0	0	0	2	0	0
k141_10182_1	0	0	4	0	0	0	0	0
k141_101874_1	0	0	0	2	0	0	0	0
k141_101874_2	0	0	0	16	0	0	0	0
k141_10191_1	0	0	0	0	2	0	0	0
k141_101927_2	0	0	0	22	0	0	0	0
k141_101954_1	0	0	0	6	0	0	0	0
k141_101964_1	0	0	0	20	0	0	0	0
k141_101966_1	0	0	0	0	0	0	2	0
k141_101995_1	0	0	0	40	0	0	0	0
k141_102005_1	0	0	2	0	0	0	0	0
k141_102032_1	0	0	0	0	6	0	0	0
k141_102068_1	0	0	0	6	0	0	0	0
k141_102072_1	0	0	0	24	0	0	0	0
k141_102075_3	0	0	0	0	0	0	2	0
k141_10208_1	9858	0	0	0	2	0	0	0
k141_10208_2	9686	0	2	0	0	0	0	0
k141_102081_1	0	0	0	0	2	0	0	0
k141_102082_1	0	0	0	6	0	0	0	0
k141_102108_2	0	0	0	0	0	0	0	2
k141_102112_1	0	0	0	2	0	0	0	0
k141_102118_1	0	0	0	12	0	0	0	0
k141_102138_2	0	0	0	22	0	0	0	0
k141_102139_1	0	0	0	0	0	2	0	0
k141_102159_2	0	0	0	0	0	2	0	0
k141_102203_2	0	0	0	8	0	0	0	0
k141_102206_1	0	0	0	6	0	0	0	0
k141_102206_3	0	0	0	30	0	0	0	0
k141_102216_1	0	0	0	10	0	0	0	0
k141_102218_2	0	0	0	26	0	0	0	0
k141_102264_1	0	0	0	12	0	0	0	0
k141_102291_1	0	0	0	0	0	4	0	0
k141_102304_1	0	0	0	2	0	0	0	0
k141_102319_1	0	0	0	0	0	0	0	4
k141_102335_2	0	0	0	0	0	0	2	0
k141_102343_1	0	0	0	2	0	0	0	0
k141_102345_1	0	0	0	2	0	0	0	0
k141_102355_1	0	0	0	2	0	0	0	0
k141_10239_1	0	0	4	0	0	0	0	0
k141_102424_1	0	0	0	28	0	0	0	0
k141_102454_1	0	0	0	0	0	2	0	0
k141_102523_1	0	0	0	8	0	0	0	0
k141_102538_1	0	0	0	12	0	0	0	0
k141_102541_1	0	0	0	4	0	0	0	0
k141_102541_2	0	0	0	2	0	0	0	0
k141_102560_1	0	0	0	0	0	0	2	0
k141_102578_1	2	0	0	0	0	2	0	0
k141_102589_2	0	0	0	18	0	0	0	0
k141_102592_1	0	0	0	0	2	0	0	0
k141_102599_1	0	0	0	4	0	0	0	0
k141_102599_3	0	0	0	14	0	0	0	0
k141_102599_4	0	0	0	12	0	0	0	0
k141_102608_1	0	0	0	26	0	0	0	0
k141_102618_1	0	0	0	20	0	0	0	0
k141_102642_1	0	0	0	4	0	0	0	0
k141_102642_2	0	0	0	18	0	0	0	0
k141_102645_1	0	0	0	34	0	0	0	0
k141_102668_2	0	0	0	0	2	0	0	0
k141_102687_2	0	0	0	2	0	0	0	0
k141_102689_2	0	0	0	0	0	2	0	0
k141_10269_2	0	0	0	74	0	0	0	0
k141_102699_1	0	0	0	24	0	0	0	0
k141_102711_2	0	0	0	20	0	0	0	0
k141_102721_1	0	0	0	30	0	0	0	0
k141_102730_1	0	0	0	6	0	0	0	0
k141_102747_1	0	0	0	0	0	4	0	0
k141_102755_2	0	0	0	28	0	0	0	0
k141_102774_2	0	0	0	4	0	0	0	0
k141_102789_1	0	0	0	0	2	0	0	0
k141_10283_1	0	0	0	4	0	0	0	0
k141_102854_1	0	0	4	0	0	0	0	0
k141_102863_1	0	0	0	0	0	0	2	0
k141_1029_1	0	0	0	4	0	0	0	0
k141_102909_2	0	0	0	6	0	0	0	0
k141_10291_1	0	0	0	14	0	0	0	0
k141_10291_2	0	0	0	4	0	0	0	0
k141_102956_1	0	0	0	0	2	0	0	0
k141_102978_1	0	0	0	6	0	0	0	0
k141_102981_2	0	0	0	0	0	0	2	0
k141_102999_1	0	0	0	4	0	0	0	0
k141_103010_1	0	0	0	2	0	0	0	0
k141_103027_1	0	0	0	12	0	0	0	0
k141_103036_1	0	0	0	26	0	0	0	0
k141_103083_1	0	0	0	6	0	0	0	0
k141_103098_1	1606	0	2	0	0	0	0	0
k141_103117_2	0	0	0	20	0	0	0	0
k141_103143_1	0	0	0	8	0	0	0	0
k141_103187_1	0	0	0	0	0	0	0	2
k141_103193_1	0	0	0	12	0	0	0	0
k141_103222_2	0	0	0	18	0	0	0	0
k141_103237_1	2	0	2	0	0	0	0	0
k141_103249_2	0	0	0	2	0	0	0	0
k141_103273_1	0	0	2	0	0	0	0	0
k141_103288_1	0	0	0	16	0	0	0	0
k141_103303_1	0	0	0	26	0	0	0	0
k141_103320_1	0	0	0	22	0	0	0	0
k141_103322_1	0	0	0	10	0	0	0	0
k141_103324_1	0	0	0	22	0	0	0	0
k141_103324_2	0	0	0	22	0	0	0	0
k141_103325_1	0	0	0	4	0	0	0	0
k141_103325_2	0	0	0	2	0	0	0	0
k141_10334_1	0	0	0	0	2	0	0	0
k141_103373_1	0	0	0	14	0	0	0	0
k141_103374_1	0	0	0	6	0	0	0	0
k141_103392_1	0	0	0	12	0	0	0	0
k141_103393_1	0	0	0	4	0	0	0	0
k141_103393_2	0	0	0	26	0	0	0	0
k141_103413_1	0	0	0	14	0	0	0	0
k141_103413_2	0	0	0	24	0	0	0	0
k141_10343_1	0	0	2	0	0	0	0	0
k141_103448_1	0	0	0	2	0	0	0	0
k141_10345_1	0	0	0	0	28	0	0	0
k141_10346_1	0	0	0	0	0	0	0	4
k141_103474_2	0	0	0	8	0	0	0	0
k141_103479_1	0	0	0	12	0	0	0	0
k141_103494_1	0	0	0	14	0	0	0	0
k141_103496_1	0	0	0	14	0	0	0	0
k141_103502_1	0	0	0	10	0	0	0	0
k141_103512_1	0	0	0	0	2	0	0	0
k141_103516_2	0	0	0	2	0	0	0	0
k141_103573_1	0	0	0	26	0	0	0	0
k141_103594_1	0	0	0	26	0	0	0	0
k141_103622_1	0	0	0	14	0	0	0	0
k141_103626_1	0	0	0	0	0	2	0	0
k141_103632_1	0	0	2	0	0	0	0	0
k141_103641_1	0	0	0	6	0	0	0	0
k141_103651_1	0	0	0	0	0	0	0	6
k141_103724_1	0	0	0	0	2	0	0	0
k141_103749_1	0	0	0	20	0	0	0	0
k141_103752_1	0	0	0	8	0	0	0	0
k141_103756_1	0	0	0	0	4	0	0	0
k141_103765_1	0	0	0	8	0	0	0	0
k141_103765_2	0	0	0	4	0	0	0	0
k141_10379_1	0	0	0	0	0	2	0	0
k141_103795_2	0	0	0	20	0	0	0	0
k141_1038_11	10602	0	2	0	0	0	0	0
k141_1038_17	5240	0	0	0	2	0	0	0
k141_1038_39	17350	0	2	0	0	0	0	0
k141_1038_4	10216	0	0	4	0	0	0	0
k141_103804_1	0	0	0	14	0	0	0	0
k141_103804_2	0	0	0	4	0	0	0	0
k141_103806_1	0	0	0	12	0	0	0	0
k141_103807_1	0	0	0	4	0	0	0	0
k141_103831_1	0	0	0	0	0	2	0	0
k141_103833_1	0	0	0	12	0	0	0	0
k141_103844_1	0	0	0	22	0	0	0	0
k141_103850_1	0	0	0	0	0	0	0	2
k141_103867_1	0	0	0	14	0	0	0	0
k141_103873_4	0	0	0	0	0	2	0	0
k141_103906_1	0	0	0	12	0	0	0	0
k141_103917_1	0	0	0	2	0	0	0	0
k141_103917_2	0	0	0	2	0	0	0	0
k141_103948_2	0	0	0	2	0	0	0	0
k141_103962_1	0	0	0	34	0	0	0	0
k141_103972_2	0	0	0	8	0	0	0	0
k141_103985_1	0	0	0	20	0	0	0	0
k141_104056_1	0	0	0	18	0	0	0	0
k141_104057_1	0	0	0	2	0	0	0	0
k141_104057_2	0	0	0	2	0	0	0	0
k141_104065_1	0	0	0	0	0	2	0	0
k141_104066_1	0	0	0	20	0	0	0	0
k141_104078_2	0	0	0	42	0	0	0	0
k141_104102_1	0	0	0	24	0	0	0	0
k141_104106_1	0	0	0	28	0	0	0	0
k141_104106_2	0	0	0	26	0	0	0	0
k141_104109_2	0	0	0	0	2	0	0	0
k141_104130_1	0	0	0	0	2	0	0	0
k141_104176_1	0	0	0	38	0	0	0	0
k141_10418_1	0	0	0	12	0	0	0	0
k141_104183_1	0	0	0	10	0	0	0	0
k141_104183_2	0	0	0	2	0	0	0	0
k141_104188_1	0	0	0	12	0	0	0	0
k141_104203_1	0	0	0	0	0	0	4	0
k141_104204_1	0	0	2	0	0	0	0	0
k141_104228_1	0	0	0	12	0	0	0	0
k141_104238_1	0	0	0	10	0	0	0	0
k141_104239_1	0	0	0	8	0	0	0	0
k141_104270_1	0	0	0	4	0	0	0	0
k141_104270_2	0	0	0	6	0	0	0	0
k141_104270_3	0	0	0	26	0	0	0	0
k141_10428_1	2	0	2	0	0	0	0	0
k141_104283_2	0	0	0	2	0	0	0	0
k141_104307_1	0	0	0	0	0	0	0	6
k141_104311_1	0	0	0	2	0	0	0	0
k141_104325_2	0	0	0	14	0	0	0	0
k141_104325_3	0	0	0	14	0	0	0	0
k141_104330_1	0	0	0	14	0	0	0	0
k141_104330_2	0	0	0	22	0	0	0	0
k141_104351_2	0	0	0	18	0	0	0	0
k141_104361_1	0	0	0	28	0	0	0	0
k141_104364_1	0	0	0	20	0	0	0	0
k141_104376_2	0	0	0	8	0	0	0	0
k141_104391_1	0	0	0	0	0	0	0	4
k141_1044_1	0	0	0	14	0	0	0	0
k141_104440_1	0	0	0	22	0	0	0	0
k141_104454_2	0	0	0	4	0	0	0	0
k141_104454_4	0	0	0	4	0	0	0	0
k141_104460_1	0	0	0	22	0	0	0	0
k141_104460_2	0	0	0	14	0	0	0	0
k141_104467_1	0	0	0	6	0	0	0	0
k141_104470_1	0	0	0	0	0	0	0	2
k141_104498_2	0	0	0	12	0	0	0	0
k141_104507_1	0	0	0	10	0	0	0	0
k141_104509_1	0	0	0	8	0	0	0	0
k141_104528_1	0	0	0	18	0	0	0	0
k141_104607_1	0	0	0	8	0	0	0	0
k141_104607_3	0	0	0	4	0	0	0	0
k141_104629_2	0	0	0	2	0	0	0	0
k141_104661_1	0	0	0	4	0	0	0	0
k141_104677_1	0	0	0	8	0	0	0	0
k141_104726_1	0	0	0	0	0	0	0	2
k141_10473_2	0	0	0	22	0	0	0	0
k141_10474_1	0	0	0	24	0	0	0	0
k141_104774_1	0	0	0	0	2	0	0	0
k141_104778_1	0	0	0	0	0	0	0	2
k141_10481_1	0	0	0	34	0	0	0	0
k141_104810_1	0	0	0	20	0	0	0	0
k141_104819_1	0	0	0	0	4	0	0	0
k141_104835_1	0	0	0	0	0	0	2	0
k141_104876_1	0	0	0	0	2	0	0	0
k141_104899_1	0	0	0	18	0	0	0	0
k141_104899_2	0	0	0	2	0	0	0	0
k141_104905_1	0	0	0	2	0	0	0	0
k141_104906_1	0	0	0	2	0	0	0	0
k141_104906_2	0	0	0	20	0	0	0	0
k141_105035_1	0	0	0	6	0	0	0	0
k141_105085_2	0	0	0	2	0	0	0	0
k141_105106_1	0	0	0	0	0	2	0	0
k141_105157_2	0	0	0	4	0	0	0	0
k141_105170_2	0	0	0	0	0	0	2	0
k141_105170_4	0	0	0	0	0	0	0	2
k141_105211_1	0	0	0	0	0	0	0	2
k141_105216_2	0	0	0	2	0	0	0	0
k141_105246_1	0	0	0	24	0	0	0	0
k141_105279_2	0	0	0	0	2	0	0	0
k141_10531_1	0	0	0	12	0	0	0	0
k141_105323_1	0	0	2	0	0	0	0	0
k141_105324_2	0	0	0	2	0	0	0	0
k141_105330_1	0	0	0	12	0	0	0	0
k141_105334_1	2	0	0	26	0	0	0	0
k141_105341_1	0	0	0	0	0	0	2	0
k141_105354_1	0	0	0	0	0	0	2	0
k141_105370_1	0	0	0	18	0	0	0	0
k141_10538_15	7596	0	0	0	0	2	0	0
k141_10538_2	3218	0	0	0	0	0	2	0
k141_10538_20	12544	0	0	0	2	0	0	0
k141_10538_23	7342	0	0	0	2	0	0	0
k141_10538_3	11258	0	0	0	0	0	2	0
k141_10538_31	20896	0	0	0	0	0	2	0
k141_10538_34	6154	0	0	0	0	2	0	0
k141_10538_36	14830	0	0	0	4	0	0	0
k141_10538_38	22272	0	0	0	0	0	2	0
k141_10538_46	13012	0	0	0	0	2	0	0
k141_10538_50	5188	0	0	2	0	0	0	0
k141_105401_1	0	0	0	28	0	0	0	0
k141_105404_2	0	0	0	2	0	0	0	0
k141_105414_1	0	0	0	10	0	0	0	0
k141_105420_3	0	0	0	30	0	0	0	0
k141_10544_2	0	0	0	22	0	0	0	0
k141_105445_1	0	0	0	12	0	0	0	0
k141_10545_1	0	0	0	0	0	4	0	0
k141_105457_1	0	0	0	10	0	0	0	0
k141_105459_1	0	0	0	0	0	4	0	0
k141_10546_2	0	0	0	24	0	0	0	0
k141_105539_2	0	0	0	4	0	0	0	0
k141_105644_1	0	0	0	6	0	0	0	0
k141_105663_1	0	0	0	0	0	0	2	0
k141_10567_1	0	0	0	6	0	0	0	0
k141_105696_1	0	0	0	22	0	0	0	0
k141_105722_1	0	0	0	24	0	0	0	0
k141_105722_2	0	0	0	30	0	0	0	0
k141_105728_1	0	0	0	4	0	0	0	0
k141_10573_2	0	0	0	16	0	0	0	0
k141_105761_1	0	0	0	4	0	0	0	0
k141_105801_2	0	0	0	22	0	0	0	0
k141_105826_1	0	0	0	4	0	0	0	0
k141_105845_1	0	0	0	2	0	0	0	0
k141_105857_1	0	0	2	0	0	0	0	0
k141_105877_1	0	0	0	32	0	0	0	0
k141_105892_1	0	0	0	10	0	0	0	0
k141_105904_2	0	0	0	4	0	0	0	0
k141_105924_2	0	0	0	14	0	0	0	0
k141_105986_11	12280	0	0	0	2	0	0	0
k141_105986_16	14062	0	0	0	0	0	2	0
k141_105986_17	1090	0	0	0	2	0	0	0
k141_105986_24	9740	0	4	0	0	0	0	0
k141_105986_32	11278	0	0	0	2	0	0	0
k141_105986_34	284	0	0	0	0	2	0	0
k141_105986_4	19008	0	0	2	0	0	0	0
k141_105987_1	0	0	0	8	0	0	0	0
k141_1061_1	0	0	0	2	0	0	0	0
k141_106133_1	0	0	0	0	0	0	0	2
k141_106158_1	0	0	0	0	4	0	0	0
k141_106165_1	0	0	0	18	0	0	0	0
k141_106194_2	0	0	0	16	0	0	0	0
k141_106222_1	0	0	0	0	0	2	0	0
k141_106235_1	0	0	0	2	0	0	0	0
k141_10629_1	0	0	0	8	0	0	0	0
k141_106297_2	0	0	0	6	0	0	0	0
k141_106297_3	0	0	0	18	0	0	0	0
k141_106327_1	0	0	0	4	0	0	0	0
k141_106359_1	2	0	0	6	0	0	0	0
k141_106375_1	0	0	0	0	0	2	0	0
k141_106383_1	0	0	0	16	0	0	0	0
k141_106398_1	0	0	0	22	0	0	0	0
k141_10641_1	0	0	0	18	0	0	0	0
k141_106413_1	0	0	0	26	0	0	0	0
k141_106434_1	0	0	0	14	0	0	0	0
k141_106483_1	0	0	0	12	0	0	0	0
k141_106498_1	0	0	0	0	0	0	4	0
k141_106573_2	0	0	0	14	0	0	0	0
k141_106575_1	0	0	0	10	0	0	0	0
k141_106595_1	0	0	0	24	0	0	0	0
k141_106631_1	0	0	0	2	0	0	0	0
k141_106635_1	0	0	0	12	0	0	0	0
k141_106635_2	0	0	0	12	0	0	0	0
k141_10665_2	0	0	0	4	0	0	0	0
k141_106663_2	0	0	2	0	0	0	0	0
k141_106703_1	0	0	0	8	0	0	0	0
k141_106752_1	2	0	0	0	4	0	0	0
k141_106753_1	0	0	0	30	0	0	0	0
k141_106794_1	0	0	0	16	0	0	0	0
k141_106794_2	0	0	0	12	0	0	0	0
k141_10686_1	0	0	0	0	0	0	2	0
k141_106881_1	0	0	0	0	0	0	2	0
k141_106956_2	0	0	0	14	0	0	0	0
k141_106960_1	0	0	0	0	0	2	0	0
k141_106969_2	0	0	0	2	0	0	0	0
k141_10702_2	0	0	0	4	0	0	0	0
k141_107038_1	0	0	0	0	0	2	0	0
k141_107082_1	0	0	0	0	0	4	0	0
k141_107091_1	0	0	0	16	0	0	0	0
k141_10711_1	0	0	0	14	0	0	0	0
k141_107160_1	0	0	0	0	0	0	2	0
k141_107181_2	0	0	0	12	0	0	0	0
k141_107209_1	0	0	0	8	0	0	0	0
k141_107264_1	0	0	0	0	2	0	0	0
k141_107274_1	0	0	2	0	0	0	0	0
k141_10731_1	0	0	0	0	0	0	0	2
k141_107329_2	0	0	0	0	0	0	2	0
k141_107355_1	0	0	0	0	0	4	0	0
k141_107356_2	0	0	0	6	0	0	0	0
k141_107386_1	0	0	0	2	0	0	0	0
k141_107396_1	0	0	2	0	0	0	0	0
k141_107400_1	0	0	0	0	0	0	0	2
k141_107427_1	0	0	0	6	0	0	0	0
k141_107446_2	0	0	0	14	0	0	0	0
k141_107496_1	0	0	0	0	6	0	0	0
k141_107510_1	0	0	0	0	2	0	0	0
k141_107524_1	0	0	0	0	0	4	0	0
k141_107545_1	0	0	0	8	0	0	0	0
k141_10755_1	0	0	0	0	2	0	0	0
k141_107570_1	0	0	0	0	0	0	0	2
k141_107572_2	0	0	0	8	0	0	0	0
k141_107583_1	0	0	0	20	0	0	0	0
k141_107648_2	0	0	0	16	0	0	0	0
k141_107680_1	0	0	0	0	0	2	0	0
k141_10769_2	0	0	0	20	0	0	0	0
k141_107690_2	0	0	0	8	0	0	0	0
k141_10776_1	0	0	0	0	0	0	0	4
k141_107766_1	0	0	2	0	0	0	0	0
k141_107804_1	0	0	0	4	0	0	0	0
k141_10782_2	0	0	0	40	0	0	0	0
k141_107835_1	0	0	0	14	0	0	0	0
k141_107838_1	0	0	0	0	0	2	0	0
k141_107841_1	0	0	0	20	0	0	0	0
k141_107846_1	0	0	0	36	0	0	0	0
k141_107852_1	0	0	0	6	0	0	0	0
k141_107852_2	0	0	0	18	0	0	0	0
k141_107866_1	0	0	0	12	0	0	0	0
k141_107867_1	0	0	0	0	6	0	0	0
k141_107869_1	0	0	0	6	0	0	0	0
k141_107880_1	0	0	0	6	0	0	0	0
k141_107901_2	0	0	2	0	0	0	0	0
k141_107931_1	0	0	2	0	0	0	0	0
k141_107941_1	2	0	0	0	0	0	2	0
k141_107963_1	0	0	0	24	0	0	0	0
k141_107966_2	0	0	0	0	0	0	2	0
k141_107976_3	0	0	0	4	0	0	0	0
k141_108017_1	0	0	0	18	0	0	0	0
k141_108043_1	0	0	0	6	0	0	0	0
k141_108043_2	0	0	0	4	0	0	0	0
k141_108079_1	0	0	0	0	0	2	0	0
k141_108085_1	0	0	0	12	0	0	0	0
k141_108085_2	0	0	0	8	0	0	0	0
k141_108085_3	0	0	0	4	0	0	0	0
k141_108105_1	0	0	0	6	0	0	0	0
k141_108118_1	0	0	0	0	2	0	0	0
k141_108197_1	0	0	0	12	0	0	0	0
k141_108209_1	0	0	0	0	2	0	0	0
k141_108233_2	0	0	0	0	0	0	0	2
k141_108236_1	0	0	0	0	0	2	0	0
k141_108240_1	0	0	0	0	0	4	0	0
k141_108290_1	0	0	0	40	0	0	0	0
k141_108297_1	0	0	0	2	0	0	0	0
k141_108297_2	0	0	0	2	0	0	0	0
k141_1083_1	0	0	0	0	0	0	2	0
k141_108320_2	0	0	0	6	0	0	0	0
k141_108335_1	0	0	0	8	0	0	0	0
k141_108345_2	0	0	0	6	0	0	0	0
k141_10836_1	0	0	0	14	0	0	0	0
k141_108363_1	0	0	0	10	0	0	0	0
k141_108383_1	0	0	0	6	0	0	0	0
k141_108397_1	0	0	0	0	0	0	0	6
k141_108404_1	0	0	2	0	0	0	0	0
k141_108411_2	0	0	0	4	0	0	0	0
k141_108419_1	0	0	0	0	2	0	0	0
k141_108428_2	0	0	0	6	0	0	0	0
k141_10843_2	0	0	0	6	0	0	0	0
k141_10843_3	0	0	0	6	0	0	0	0
k141_108433_1	0	0	0	8	0	0	0	0
k141_108464_1	0	0	0	22	0	0	0	0
k141_108464_2	0	0	0	4	0	0	0	0
k141_108478_2	0	0	0	0	0	0	0	2
k141_10853_1	0	0	0	2	0	0	0	0
k141_108558_2	0	0	0	6	0	0	0	0
k141_108574_1	0	0	0	0	0	0	2	0
k141_108591_1	0	0	0	0	2	0	0	0
k141_108608_2	2	0	0	18	0	0	0	0
k141_108614_1	0	0	0	8	0	0	0	0
k141_108614_2	0	0	0	22	0	0	0	0
k141_108630_1	0	0	0	14	0	0	0	0
k141_10864_2	0	0	0	2	0	0	0	0
k141_108648_1	0	0	0	2	0	0	0	0
k141_108650_1	0	0	0	0	0	0	0	2
k141_10870_1	0	0	0	0	0	0	0	4
k141_108705_1	0	0	0	2	0	0	0	0
k141_108729_1	0	0	0	2	0	0	0	0
k141_108751_2	0	0	2	0	0	0	0	0
k141_108797_1	0	0	0	16	0	0	0	0
k141_108806_2	0	0	0	2	0	0	0	0
k141_108838_4	0	0	2	0	0	0	0	0
k141_108880_2	0	0	0	32	0	0	0	0
k141_108912_1	0	0	0	14	0	0	0	0
k141_108912_2	0	0	0	18	0	0	0	0
k141_108935_1	0	0	0	0	0	2	0	0
k141_108996_1	0	0	0	2	0	0	0	0
k141_1090_1	0	0	0	26	0	0	0	0
k141_109098_1	0	0	0	0	2	0	0	0
k141_109146_1	0	0	0	2	0	0	0	0
k141_1092_1	0	0	0	26	0	0	0	0
k141_109222_1	0	0	0	0	0	0	2	0
k141_10924_2	0	0	0	0	0	0	0	2
k141_109249_1	0	0	0	8	0	0	0	0
k141_109259_1	2	0	2	0	0	0	0	0
k141_10933_1	0	0	0	2	0	0	0	0
k141_10936_1	0	0	0	20	0	0	0	0
k141_10945_1	0	0	0	8	0	0	0	0
k141_10950_2	0	0	0	18	0	0	0	0
k141_10972_1	0	0	0	20	0	0	0	0
k141_10973_1	0	0	0	0	2	0	0	0
k141_10978_1	0	0	0	0	0	2	0	0
k141_11027_1	0	0	0	0	0	2	0	0
k141_11034_1	0	0	0	4	0	0	0	0
k141_11034_2	0	0	0	10	0	0	0	0
k141_11064_1	0	0	0	0	0	2	0	0
k141_1108_1	0	0	0	24	0	0	0	0
k141_11086_4	0	0	0	4	0	0	0	0
k141_11091_2	0	0	0	4	0	0	0	0
k141_11110_2	0	0	0	4	0	0	0	0
k141_11130_1	0	0	0	16	0	0	0	0
k141_11144_1	0	0	0	10	0	0	0	0
k141_11145_1	0	0	0	0	0	2	0	0
k141_11150_1	0	0	0	4	0	0	0	0
k141_11176_2	17112	0	0	0	0	0	2	0
k141_11206_1	0	0	0	0	2	0	0	0
k141_11215_1	0	0	0	0	0	0	0	2
k141_11241_1	0	0	0	18	0	0	0	0
k141_11241_2	0	0	0	10	0	0	0	0
k141_11241_3	2	0	0	4	0	0	0	0
k141_1126_1	0	0	0	2	0	0	0	0
k141_11287_3	0	0	0	16	0	0	0	0
k141_11287_4	0	0	0	4	0	0	0	0
k141_1131_1	0	0	0	20	0	0	0	0
k141_11321_1	0	0	0	0	2	0	0	0
k141_11322_2	0	0	0	34	0	0	0	0
k141_11324_1	0	0	0	0	0	2	0	0
k141_11347_1	0	0	0	0	2	0	0	0
k141_11360_1	0	0	0	0	0	0	2	0
k141_11389_1	0	0	0	8	0	0	0	0
k141_11400_2	0	0	0	4	0	0	0	0
k141_11409_1	0	0	0	0	0	6	0	0
k141_11423_1	0	0	0	14	0	0	0	0
k141_11462_1	0	0	0	0	0	0	2	0
k141_11482_1	0	0	0	6	0	0	0	0
k141_11484_1	0	0	0	10	0	0	0	0
k141_11490_3	0	0	0	4	0	0	0	0
k141_11495_1	0	0	2	0	0	0	0	0
k141_11501_1	0	0	0	12	0	0	0	0
k141_11515_1	0	0	0	0	2	0	0	0
k141_11536_1	0	0	0	0	0	2	0	0
k141_11541_1	0	0	0	14	0	0	0	0
k141_11568_2	0	0	0	2	0	0	0	0
k141_11584_1	0	0	0	0	2	0	0	0
k141_11610_2	0	0	0	4	0	0	0	0
k141_11614_1	0	0	0	0	2	0	0	0
k141_11648_1	0	0	0	0	2	0	0	0
k141_11651_1	0	0	0	20	0	0	0	0
k141_11657_2	0	0	0	2	0	0	0	0
k141_11666_1	0	0	0	12	0	0	0	0
k141_11666_2	0	0	0	2	0	0	0	0
k141_11666_3	0	0	0	4	0	0	0	0
k141_11676_1	0	0	0	0	0	0	0	8
k141_11688_2	0	0	0	14	0	0	0	0
k141_11689_1	0	0	0	0	0	2	0	0
k141_11691_1	0	0	0	4	0	0	0	0
k141_1171_2	0	0	0	0	0	0	0	2
k141_11721_1	0	0	0	12	0	0	0	0
k141_11721_2	0	0	0	14	0	0	0	0
k141_11736_1	0	0	0	24	0	0	0	0
k141_11753_1	0	0	0	2	0	0	0	0
k141_11775_1	0	0	0	4	0	0	0	0
k141_11777_1	0	0	0	10	0	0	0	0
k141_11785_1	0	0	0	16	0	0	0	0
k141_11790_1	0	0	0	20	0	0	0	0
k141_11804_1	0	0	0	4	0	0	0	0
k141_11809_1	0	0	0	2	0	0	0	0
k141_11809_2	0	0	0	4	0	0	0	0
k141_11815_2	0	0	0	6	0	0	0	0
k141_11850_3	0	0	0	10	0	0	0	0
k141_11873_1	0	0	0	6	0	0	0	0
k141_11874_1	0	0	0	0	0	2	0	0
k141_119_1	0	0	0	0	0	0	0	4
k141_11902_1	0	0	0	40	0	0	0	0
k141_11915_1	0	0	0	8	0	0	0	0
k141_11930_1	0	0	0	4	0	0	0	0
k141_11937_2	0	0	0	14	0	0	0	0
k141_11975_1	0	0	0	0	0	0	2	0
k141_12016_2	0	0	0	0	4	0	0	0
k141_12019_4	0	0	0	0	0	0	2	0
k141_12029_1	0	0	0	0	4	0	0	0
k141_1203_1	0	0	0	6	0	0	0	0
k141_12052_1	0	0	0	0	2	0	0	0
k141_12072_1	0	0	0	0	0	0	0	2
k141_12090_2	0	0	0	2	0	0	0	0
k141_12096_1	0	0	2	0	0	0	0	0
k141_12107_2	0	0	0	8	0	0	0	0
k141_12118_2	0	0	0	20	0	0	0	0
k141_12141_1	0	0	0	10	0	0	0	0
k141_12141_2	0	0	0	2	0	0	0	0
k141_12153_1	0	0	0	16	0	0	0	0
k141_12158_1	0	0	0	12	0	0	0	0
k141_12158_2	0	0	0	12	0	0	0	0
k141_12185_1	0	0	0	2	0	0	0	0
k141_12211_1	0	0	0	28	0	0	0	0
k141_12222_2	0	0	0	0	2	0	0	0
k141_12233_1	0	0	2	0	0	0	0	0
k141_12263_2	0	0	0	4	0	0	0	0
k141_12267_1	0	0	0	14	0	0	0	0
k141_12281_1	0	0	0	6	0	0	0	0
k141_12281_2	0	0	0	4	0	0	0	0
k141_1231_1	2	0	0	0	0	0	2	0
k141_12322_1	0	0	0	6	0	0	0	0
k141_12324_1	0	0	0	22	0	0	0	0
k141_12358_2	0	0	0	20	0	0	0	0
k141_12404_1	0	0	0	8	0	0	0	0
k141_12408_1	0	0	0	10	0	0	0	0
k141_1242_1	0	0	0	4	0	0	0	0
k141_1242_2	0	0	0	6	0	0	0	0
k141_1244_1	0	0	0	0	4	0	0	0
k141_12448_1	0	0	0	18	0	0	0	0
k141_12448_2	0	0	0	16	0	0	0	0
k141_1245_1	0	0	0	24	0	0	0	0
k141_1246_3	0	0	0	0	0	0	2	0
k141_12465_1	4	0	0	0	0	2	0	0
k141_12477_1	0	0	0	0	0	6	0	0
k141_12505_1	0	0	0	22	0	0	0	0
k141_12537_1	0	0	2	0	0	0	0	0
k141_12552_1	0	0	0	0	0	0	4	0
k141_12554_1	0	0	0	0	0	0	2	0
k141_12566_1	0	0	0	16	0	0	0	0
k141_12567_1	0	0	0	18	0	0	0	0
k141_12573_1	0	0	0	6	0	0	0	0
k141_12597_2	0	0	0	0	0	0	2	0
k141_12612_2	0	0	0	0	0	2	0	0
k141_12612_3	0	0	4	0	0	0	0	0
k141_12626_1	0	0	0	2	0	0	0	0
k141_12642_1	0	0	0	28	0	0	0	0
k141_12647_2	0	0	0	24	0	0	0	0
k141_12673_2	0	0	0	2	0	0	0	0
k141_12679_2	0	0	0	0	0	0	2	0
k141_12735_1	0	0	0	4	0	0	0	0
k141_12755_1	0	0	0	16	0	0	0	0
k141_1276_2	0	0	0	6	0	0	0	0
k141_128_1	0	0	2	0	0	0	0	0
k141_1280_1	0	0	0	26	0	0	0	0
k141_12825_1	0	0	0	14	0	0	0	0
k141_12833_1	0	0	0	0	0	2	0	0
k141_12844_1	0	0	0	16	0	0	0	0
k141_12864_1	0	0	2	0	0	0	0	0
k141_12911_1	0	0	0	8	0	0	0	0
k141_12926_2	0	0	0	0	0	0	0	2
k141_12946_2	0	0	0	10	0	0	0	0
k141_12947_10	0	0	0	0	0	0	0	2
k141_12953_2	0	0	0	10	0	0	0	0
k141_12960_1	0	0	0	0	2	0	0	0
k141_12972_3	960	0	0	0	0	2	0	0
k141_13010_1	0	0	0	0	0	0	2	0
k141_1302_1	0	0	0	8	0	0	0	0
k141_1302_2	0	0	0	10	0	0	0	0
k141_13028_1	0	0	0	0	0	2	0	0
k141_13044_1	0	0	0	0	12	0	0	0
k141_1305_1	0	0	0	2	0	0	0	0
k141_13053_1	0	0	0	0	0	0	2	0
k141_13063_1	0	0	0	8	0	0	0	0
k141_1313_1	0	0	0	0	0	0	0	4
k141_13140_1	0	0	0	0	2	0	0	0
k141_13155_1	0	0	0	8	0	0	0	0
k141_13171_1	0	0	0	34	0	0	0	0
k141_13173_2	0	0	0	28	0	0	0	0
k141_13173_3	0	0	0	6	0	0	0	0
k141_13177_1	0	0	2	0	0	0	0	0
k141_13179_1	0	0	0	0	0	4	0	0
k141_13215_1	0	0	0	0	2	0	0	0
k141_13250_1	0	0	0	2	0	0	0	0
k141_13302_2	0	0	0	0	0	0	2	0
k141_13310_5	0	0	0	2	0	0	0	0
k141_13347_1	0	0	0	0	2	0	0	0
k141_1335_1	0	0	0	20	0	0	0	0
k141_13351_6	1238	0	0	0	0	2	0	0
k141_13351_7	13716	0	0	0	0	0	6	0
k141_13363_1	0	0	0	8	0	0	0	0
k141_13373_2	0	0	0	2	0	0	0	0
k141_13378_1	0	0	0	4	0	0	0	0
k141_13391_1	0	0	0	4	0	0	0	0
k141_13391_2	0	0	0	2	0	0	0	0
k141_134_3	0	0	0	8	0	0	0	0
k141_13402_1	0	0	0	16	0	0	0	0
k141_13402_2	0	0	0	6	0	0	0	0
k141_13403_1	0	0	0	2	0	0	0	0
k141_1342_1	0	0	0	36	0	0	0	0
k141_13455_1	0	0	0	16	0	0	0	0
k141_13497_1	0	0	0	8	0	0	0	0
k141_13506_1	0	0	0	2	0	0	0	0
k141_13547_1	0	0	0	16	0	0	0	0
k141_13567_2	0	0	0	16	0	0	0	0
k141_13576_1	0	0	0	0	0	2	0	0
k141_1359_1	0	0	0	0	2	0	0	0
k141_13614_1	0	0	2	0	0	0	0	0
k141_13627_1	0	0	0	20	0	0	0	0
k141_13640_1	0	0	0	14	0	0	0	0
k141_13658_1	0	0	0	0	0	0	2	0
k141_13659_2	0	0	0	4	0	0	0	0
k141_13669_1	0	0	0	0	4	0	0	0
k141_13718_1	0	0	0	6	0	0	0	0
k141_13722_1	0	0	0	12	0	0	0	0
k141_13732_1	0	0	0	0	2	0	0	0
k141_13745_1	0	0	0	0	0	0	2	0
k141_13754_15	12334	0	2	0	0	0	0	0
k141_13754_18	2512	0	0	0	0	2	0	0
k141_13754_2	4860	0	2	0	0	0	0	0
k141_13754_21	6102	0	0	0	0	0	2	0
k141_13754_23	23260	0	0	0	0	0	2	0
k141_13754_26	5184	0	0	0	2	0	0	0
k141_13754_33	29954	0	6	0	0	0	0	0
k141_13754_50	15038	0	0	0	0	0	2	0
k141_13754_7	3694	0	0	0	0	0	2	0
k141_13776_1	0	0	0	0	0	2	0	0
k141_13777_1	0	0	0	4	0	0	0	0
k141_13810_1	0	0	0	4	0	0	0	0
k141_13821_1	0	0	0	24	0	0	0	0
k141_13838_2	0	0	0	10	0	0	0	0
k141_13865_1	0	0	14	0	0	0	0	0
k141_13919_1	0	0	0	6	0	0	0	0
k141_13933_1	0	0	0	28	0	0	0	0
k141_13955_1	0	0	0	22	0	0	0	0
k141_13957_2	0	0	0	10	0	0	0	0
k141_13980_1	0	0	2	0	0	0	0	0
k141_13992_1	0	0	0	0	0	2	0	0
k141_13997_1	0	0	0	0	0	0	0	4
k141_14013_1	0	0	0	24	0	0	0	0
k141_14023_2	0	0	0	6	0	0	0	0
k141_14025_1	0	0	0	0	0	2	0	0
k141_14030_2	0	0	0	0	2	0	0	0
k141_14033_1	0	0	0	10	0	0	0	0
k141_14049_1	0	0	0	2	0	0	0	0
k141_14049_2	0	0	0	34	0	0	0	0
k141_14057_1	0	0	0	0	0	2	0	0
k141_14079_1	0	0	0	28	0	0	0	0
k141_14081_1	0	0	0	0	0	0	2	0
k141_1409_1	0	0	0	0	0	2	0	0
k141_14114_1	0	0	0	20	0	0	0	0
k141_14114_2	0	0	0	10	0	0	0	0
k141_14127_1	0	0	0	10	0	0	0	0
k141_14127_2	0	0	0	16	0	0	0	0
k141_1413_1	0	0	0	6	0	0	0	0
k141_14137_3	0	0	0	2	0	0	0	0
k141_14150_1	0	0	0	22	0	0	0	0
k141_14159_1	0	0	0	0	2	0	0	0
k141_1418_1	0	0	2	0	0	0	0	0
k141_14210_1	0	0	0	0	0	2	0	0
k141_14229_1	0	0	0	2	0	0	0	0
k141_14242_1	0	0	0	0	0	0	2	0
k141_14271_1	0	0	0	26	0	0	0	0
k141_1432_1	0	0	0	10	0	0	0	0
k141_14321_1	0	0	0	0	0	2	0	0
k141_14326_1	0	0	0	0	0	0	2	0
k141_14336_1	0	0	0	16	0	0	0	0
k141_14355_1	0	0	0	16	0	0	0	0
k141_14360_1	0	0	0	0	2	0	0	0
k141_14385_2	0	0	0	0	0	0	2	0
k141_14400_1	0	0	0	8	0	0	0	0
k141_14413_1	0	0	0	0	2	0	0	0
k141_14427_1	0	0	0	12	0	0	0	0
k141_14449_2	0	0	0	2	0	0	0	0
k141_14453_1	0	0	0	6	0	0	0	0
k141_14462_1	0	0	0	2	0	0	0	0
k141_14462_2	0	0	0	4	0	0	0	0
k141_14503_2	0	0	0	16	0	0	0	0
k141_14505_1	0	0	0	0	0	2	0	0
k141_14510_1	0	0	0	0	2	0	0	0
k141_14544_1	0	0	0	0	0	0	2	0
k141_14569_1	0	0	0	0	2	0	0	0
k141_14581_1	0	0	0	0	0	2	0	0
k141_14582_1	0	0	0	0	0	0	0	2
k141_1463_1	0	0	0	18	0	0	0	0
k141_14640_1	0	0	0	0	0	2	0	0
k141_14661_1	0	0	0	12	0	0	0	0
k141_14680_1	0	0	0	6	0	0	0	0
k141_14686_1	0	0	0	0	0	0	2	0
k141_14729_1	0	0	0	18	0	0	0	0
k141_14739_1	0	0	0	16	0	0	0	0
k141_14754_1	2	0	0	0	0	0	4	0
k141_14777_1	0	0	0	0	2	0	0	0
k141_14810_2	0	0	0	10	0	0	0	0
k141_14819_1	0	0	6	0	0	0	0	0
k141_14824_1	0	0	0	0	2	0	0	0
k141_14855_1	0	0	0	0	0	2	0	0
k141_14859_1	2	0	0	0	0	4	0	0
k141_14868_1	0	0	0	0	0	2	0	0
k141_14878_1	0	0	0	0	0	0	2	0
k141_1489_2	0	0	0	16	0	0	0	0
k141_14896_1	0	0	0	2	0	0	0	0
k141_14902_2	0	0	0	14	0	0	0	0
k141_14928_1	0	0	0	6	0	0	0	0
k141_14937_2	0	0	2	0	0	0	0	0
k141_14945_2	0	0	0	4	0	0	0	0
k141_14955_2	0	0	0	10	0	0	0	0
k141_14964_1	0	0	0	2	0	0	0	0
k141_14988_2	0	0	0	4	0	0	0	0
k141_14994_1	0	0	0	2	0	0	0	0
k141_15004_2	0	0	0	2	0	0	0	0
k141_15063_1	0	0	0	6	0	0	0	0
k141_15091_3	0	0	0	2	0	0	0	0
k141_15108_1	0	0	0	0	0	0	2	0
k141_1512_1	2	0	0	0	2	0	0	0
k141_15144_1	0	0	0	2	0	0	0	0
k141_15156_1	0	0	0	0	2	0	0	0
k141_15180_2	0	0	0	0	2	0	0	0
k141_15206_1	0	0	0	8	0	0	0	0
k141_15235_1	0	0	0	0	0	0	0	2
k141_15250_1	2	0	0	0	0	2	0	0
k141_15252_1	0	0	0	0	0	2	0	0
k141_15261_1	0	0	0	26	0	0	0	0
k141_15273_1	0	0	0	6	0	0	0	0
k141_15275_1	0	0	0	10	0	0	0	0
k141_15282_1	0	0	6	0	0	0	0	0
k141_15319_2	0	0	0	34	0	0	0	0
k141_15330_1	0	0	0	12	0	0	0	0
k141_15330_2	0	0	0	18	0	0	0	0
k141_15336_1	0	0	0	6	0	0	0	0
k141_15360_1	0	0	0	18	0	0	0	0
k141_15379_1	0	0	0	10	0	0	0	0
k141_15383_1	0	0	0	4	0	0	0	0
k141_15384_1	0	0	0	0	0	2	0	0
k141_15386_1	0	0	0	12	0	0	0	0
k141_15405_2	0	0	0	8	0	0	0	0
k141_15419_1	0	0	0	10	0	0	0	0
k141_15420_1	0	0	0	2	0	0	0	0
k141_15420_2	0	0	0	14	0	0	0	0
k141_15420_3	0	0	0	2	0	0	0	0
k141_15421_1	0	0	0	0	0	0	2	0
k141_15431_1	0	0	0	0	2	0	0	0
k141_15438_1	0	0	0	14	0	0	0	0
k141_1544_1	2	0	0	0	2	0	0	0
k141_15444_1	0	0	0	0	0	0	2	0
k141_15466_1	0	0	0	2	0	0	0	0
k141_15466_3	0	0	0	2	0	0	0	0
k141_15478_1	0	0	0	38	0	0	0	0
k141_15498_2	0	0	0	8	0	0	0	0
k141_15530_2	0	0	0	24	0	0	0	0
k141_15535_1	0	0	0	0	0	0	2	0
k141_15542_17	12856	0	0	0	0	2	0	0
k141_15542_22	9074	0	0	0	0	2	0	0
k141_15542_23	8198	0	0	0	2	0	0	0
k141_15542_28	12588	0	2	0	0	0	0	0
k141_15542_31	5000	0	0	0	0	0	2	0
k141_15542_44	9412	0	0	0	0	0	0	4
k141_15542_52	13302	0	0	0	0	0	2	0
k141_15550_1	0	0	0	0	0	0	2	0
k141_15568_1	0	0	0	18	0	0	0	0
k141_15593_1	0	0	0	4	0	0	0	0
k141_15593_3	0	0	0	20	0	0	0	0
k141_15599_1	0	0	0	16	0	0	0	0
k141_15625_1	0	0	0	6	0	0	0	0
k141_15634_1	0	0	0	6	0	0	0	0
k141_15634_2	0	0	0	28	0	0	0	0
k141_15634_3	0	0	0	16	0	0	0	0
k141_1564_1	0	0	0	20	0	0	0	0
k141_15652_1	0	0	0	2	0	0	0	0
k141_15690_101	8796	0	0	4	0	0	0	0
k141_15690_104	6612	0	0	2	0	0	0	0
k141_15690_11	17944	0	2	0	0	0	0	0
k141_15690_114	11980	0	0	0	2	0	0	0
k141_15690_116	12390	0	0	0	0	2	0	0
k141_15690_121	6756	0	0	0	0	0	2	0
k141_15690_125	26	0	0	2	0	0	0	0
k141_15690_126	4232	0	0	2	0	0	0	0
k141_15690_134	2252	0	0	0	0	0	0	2
k141_15690_143	4368	0	0	0	0	2	0	0
k141_15690_146	2622	0	2	0	0	0	0	0
k141_15690_149	6052	0	0	0	0	0	4	0
k141_15690_153	10368	0	0	0	0	0	4	0
k141_15690_160	8890	0	2	0	0	0	0	0
k141_15690_163	10368	0	0	0	2	0	0	0
k141_15690_170	25246	0	0	0	8	0	0	0
k141_15690_172	8146	0	0	0	2	0	0	0
k141_15690_173	1492	0	0	0	0	4	0	0
k141_15690_174	5346	0	0	0	0	0	2	0
k141_15690_175	4466	0	0	0	2	0	0	0
k141_15690_180	2610	0	0	0	0	0	2	0
k141_15690_29	5672	0	0	0	0	0	4	0
k141_15690_37	2564	0	0	2	0	0	0	0
k141_15690_61	6086	0	0	4	0	0	0	0
k141_15690_66	1320	0	0	0	2	0	0	0
k141_15690_73	13502	0	0	0	0	4	0	0
k141_15690_81	15448	0	0	0	0	2	0	0
k141_15690_85	13904	0	0	0	0	0	2	0
k141_15690_89	3140	0	0	0	0	0	2	0
k141_15690_93	1042	0	0	0	0	0	2	0
k141_15690_94	17886	0	0	0	0	2	0	0
k141_15690_95	3092	0	0	0	2	0	0	0
k141_15690_96	6102	0	2	0	0	0	0	0
k141_15699_1	0	0	0	0	2	0	0	0
k141_15737_1	0	0	0	66	0	0	0	0
k141_15737_2	0	0	0	2	0	0	0	0
k141_15751_2	0	0	0	2	0	0	0	0
k141_15799_1	0	0	0	8	0	0	0	0
k141_15809_1	0	0	0	0	0	10	0	0
k141_15818_3	0	0	0	2	0	0	0	0
k141_15831_1	0	0	0	0	0	0	0	2
k141_15873_1	0	0	0	0	2	0	0	0
k141_15885_1	0	0	0	0	2	0	0	0
k141_15897_1	0	0	0	14	0	0	0	0
k141_15934_21	706	0	2	0	0	0	0	0
k141_15934_25	3634	0	0	0	0	2	0	0
k141_15934_30	16358	0	0	0	2	0	0	0
k141_15934_35	13282	0	0	0	0	0	2	0
k141_15934_56	13462	0	6	0	0	0	0	0
k141_15934_57	9256	0	0	0	2	0	0	0
k141_15934_58	15052	0	0	0	0	0	2	0
k141_15934_6	3962	0	0	0	2	0	0	0
k141_15934_66	13504	0	2	0	0	0	0	0
k141_15934_73	12846	0	0	0	0	0	2	0
k141_15938_1	0	0	0	6	0	0	0	0
k141_15939_1	0	0	0	6	0	0	0	0
k141_15951_1	0	0	0	0	0	2	0	0
k141_15952_1	0	0	0	0	0	2	0	0
k141_16022_1	0	0	0	0	2	0	0	0
k141_1604_1	0	0	0	6	0	0	0	0
k141_1604_2	0	0	0	22	0	0	0	0
k141_16127_1	0	0	0	0	0	2	0	0
k141_16136_2	0	0	0	0	0	2	0	0
k141_16145_2	0	0	0	2	0	0	0	0
k141_16145_3	0	0	0	2	0	0	0	0
k141_16165_1	0	0	0	16	0	0	0	0
k141_16184_2	0	0	0	4	0	0	0	0
k141_16187_2	0	0	0	0	0	0	0	2
k141_16216_7	0	0	2	0	0	0	0	0
k141_16238_2	0	0	0	2	0	0	0	0
k141_16244_1	0	0	0	0	2	0	0	0
k141_16265_2	0	0	0	8	0	0	0	0
k141_16283_1	0	0	0	22	0	0	0	0
k141_16336_1	0	0	0	12	0	0	0	0
k141_16336_2	0	0	0	20	0	0	0	0
k141_16343_1	0	0	0	0	0	0	2	0
k141_16382_1	0	0	0	8	0	0	0	0
k141_16399_1	0	0	0	4	0	0	0	0
k141_16399_3	0	0	0	8	0	0	0	0
k141_16401_4	0	0	2	0	0	0	0	0
k141_16435_1	0	0	0	0	2	0	0	0
k141_16449_1	0	0	0	14	0	0	0	0
k141_16452_1	0	0	0	2	0	0	0	0
k141_16453_2	0	0	0	0	0	0	2	0
k141_16478_1	0	0	0	0	2	0	0	0
k141_16491_1	0	0	0	0	2	0	0	0
k141_16531_1	0	0	0	0	0	0	2	0
k141_16544_1	0	0	0	0	0	2	0	0
k141_16550_1	0	0	0	0	4	0	0	0
k141_16588_1	0	0	0	0	2	0	0	0
k141_16590_1	0	0	2	0	0	0	0	0
k141_16602_2	0	0	0	0	2	0	0	0
k141_1664_1	0	0	0	6	0	0	0	0
k141_1664_2	0	0	0	6	0	0	0	0
k141_1664_3	0	0	0	8	0	0	0	0
k141_16657_1	0	0	0	20	0	0	0	0
k141_16672_1	2	0	0	0	2	0	0	0
k141_16719_1	0	0	2	0	0	0	0	0
k141_16720_2	0	0	0	12	0	0	0	0
k141_16720_3	0	0	0	14	0	0	0	0
k141_16729_1	0	0	0	8	0	0	0	0
k141_16760_1	0	0	0	40	0	0	0	0
k141_16795_2	0	0	0	2	0	0	0	0
k141_1680_1	0	0	0	4	0	0	0	0
k141_16808_1	0	0	0	16	0	0	0	0
k141_16812_1	0	0	0	0	0	4	0	0
k141_16825_1	0	0	0	4	0	0	0	0
k141_16879_1	0	0	0	26	0	0	0	0
k141_1688_1	0	0	0	0	8	0	0	0
k141_16939_1	0	0	0	0	0	0	6	0
k141_16972_1	0	0	0	4	0	0	0	0
k141_16977_1	0	0	0	0	0	0	0	2
k141_16996_1	0	0	0	2	0	0	0	0
k141_17004_1	0	0	0	2	0	0	0	0
k141_17021_1	0	0	0	12	0	0	0	0
k141_17033_1	0	0	0	0	0	2	0	0
k141_17034_1	0	0	0	0	2	0	0	0
k141_17037_1	8	0	0	0	0	0	2	0
k141_1704_1	0	0	0	12	0	0	0	0
k141_17074_1	0	0	0	6	0	0	0	0
k141_17092_1	0	0	0	12	0	0	0	0
k141_17106_1	0	0	0	4	0	0	0	0
k141_17114_1	0	0	2	0	0	0	0	0
k141_17129_1	0	0	0	26	0	0	0	0
k141_17182_2	0	0	0	6	0	0	0	0
k141_17189_1	0	0	0	0	2	0	0	0
k141_17213_1	0	0	0	8	0	0	0	0
k141_17223_1	0	0	0	2	0	0	0	0
k141_17259_2	0	0	0	0	0	2	0	0
k141_17284_2	0	0	0	2	0	0	0	0
k141_17290_1	0	0	0	0	0	2	0	0
k141_17304_1	0	0	0	10	0	0	0	0
k141_1731_1	0	0	0	0	0	2	0	0
k141_17316_1	0	0	0	4	0	0	0	0
k141_17342_1	0	0	0	36	0	0	0	0
k141_17361_1	0	0	0	0	0	0	4	0
k141_17380_1	0	0	0	0	0	2	0	0
k141_17381_1	0	0	0	2	0	0	0	0
k141_17381_2	0	0	0	8	0	0	0	0
k141_17426_1	0	0	0	28	0	0	0	0
k141_17458_2	0	0	0	0	2	0	0	0
k141_17486_1	0	0	0	6	0	0	0	0
k141_17494_1	0	0	0	18	0	0	0	0
k141_17503_2	0	0	0	0	2	0	0	0
k141_17511_1	0	0	0	2	0	0	0	0
k141_17515_2	0	0	0	0	2	0	0	0
k141_17517_1	0	0	0	0	0	6	0	0
k141_1752_1	0	0	0	4	0	0	0	0
k141_1752_2	0	0	0	16	0	0	0	0
k141_17520_1	0	0	2	0	0	0	0	0
k141_17524_2	0	0	0	2	0	0	0	0
k141_17542_1	0	0	0	0	2	0	0	0
k141_17549_1	0	0	0	0	0	0	2	0
k141_17606_1	0	0	0	8	0	0	0	0
k141_17621_2	0	0	0	0	2	0	0	0
k141_17623_103	2536	0	2	0	0	0	0	0
k141_17623_110	2852	0	2	0	0	0	0	0
k141_17623_113	1610	0	0	0	0	0	2	0
k141_17623_125	738	0	0	0	2	0	0	0
k141_17623_133	2842	0	0	0	2	0	0	0
k141_17623_134	7978	0	0	0	2	0	0	0
k141_17623_145	11720	0	0	0	0	2	0	0
k141_17623_149	712	0	0	0	0	0	2	0
k141_17623_153	4924	0	0	0	0	0	2	0
k141_17623_166	10986	0	0	0	2	0	0	0
k141_17623_168	4042	0	0	0	0	0	2	0
k141_17623_169	11738	0	0	0	2	0	0	0
k141_17623_177	7934	0	0	0	0	0	2	0
k141_17623_178	6092	0	0	0	0	2	0	0
k141_17623_184	2672	0	2	0	0	0	0	0
k141_17623_185	692	0	0	0	0	0	2	0
k141_17623_196	11634	0	0	0	0	0	2	0
k141_17623_203	2464	0	0	6	0	0	0	0
k141_17623_212	5070	0	0	0	0	0	0	2
k141_17623_214	9432	0	0	0	2	0	0	0
k141_17623_219	440	0	0	2	0	0	0	0
k141_17623_222	5686	0	0	2	0	0	0	0
k141_17623_226	14122	0	0	8	0	0	0	0
k141_17623_23	1638	0	0	0	0	2	0	0
k141_17623_231	8492	0	0	0	2	0	0	0
k141_17623_234	926	0	4	0	0	0	0	0
k141_17623_237	6038	0	0	0	0	0	2	0
k141_17623_24	12508	0	0	2	0	0	0	0
k141_17623_245	3230	0	0	0	0	4	0	0
k141_17623_246	5202	0	0	0	0	0	2	0
k141_17623_264	9300	0	0	0	0	0	2	0
k141_17623_267	6544	0	0	0	0	0	2	0
k141_17623_275	6280	0	0	2	0	0	0	0
k141_17623_285	8724	0	2	0	0	0	0	0
k141_17623_303	3820	0	0	0	2	0	0	0
k141_17623_306	16300	0	2	0	0	0	0	0
k141_17623_307	7098	0	0	0	0	2	0	0
k141_17623_31	6854	0	0	0	0	0	2	0
k141_17623_317	3872	0	0	0	0	2	0	0
k141_17623_33	9576	0	0	0	2	0	0	0
k141_17623_336	7378	0	0	0	0	0	2	0
k141_17623_340	10534	0	0	0	0	4	0	0
k141_17623_358	9176	0	0	0	0	0	6	0
k141_17623_365	2550	0	0	0	2	0	0	0
k141_17623_367	700	0	0	2	0	0	0	0
k141_17623_369	6534	0	0	0	2	0	0	0
k141_17623_379	9004	0	0	0	0	2	0	0
k141_17623_387	3224	0	0	4	0	0	0	0
k141_17623_389	7340	0	0	0	0	2	0	0
k141_17623_398	7946	0	0	0	0	2	0	0
k141_17623_404	10422	0	0	0	4	0	0	0
k141_17623_406	2962	0	2	0	0	0	0	0
k141_17623_42	5336	0	0	0	0	2	0	0
k141_17623_44	12708	0	0	0	2	0	0	0
k141_17623_5	1476	0	0	0	2	0	0	0
k141_17623_50	2732	0	0	0	0	2	0	0
k141_17623_52	5744	0	0	0	0	0	2	0
k141_17623_54	12840	0	0	0	0	0	4	0
k141_17623_57	6724	0	0	0	2	0	0	0
k141_17623_60	5470	0	0	0	2	0	0	0
k141_17623_69	9710	0	0	0	0	2	0	0
k141_17623_85	11042	0	0	2	0	0	0	0
k141_17623_93	8644	0	0	0	0	0	2	0
k141_17623_95	7662	0	0	0	0	0	2	0
k141_17634_3	0	0	0	0	2	0	0	0
k141_17655_2	0	0	0	14	0	0	0	0
k141_17659_1	0	0	0	0	2	0	0	0
k141_17663_2	0	0	0	4	0	0	0	0
k141_17671_1	0	0	0	28	0	0	0	0
k141_17686_1	2	0	0	0	0	2	0	0
k141_1769_1	0	0	0	4	0	0	0	0
k141_1769_2	0	0	0	6	0	0	0	0
k141_17758_1	0	0	0	4	0	0	0	0
k141_17769_1	0	0	0	0	2	0	0	0
k141_17797_1	2	0	0	10	0	0	0	0
k141_17824_1	0	0	0	0	0	6	0	0
k141_17825_2	0	0	0	2	0	0	0	0
k141_17901_1	0	0	0	0	0	0	0	6
k141_17918_2	0	0	0	16	0	0	0	0
k141_17974_1	2	0	2	0	0	0	0	0
k141_18003_1	0	0	0	0	2	0	0	0
k141_18015_1	0	0	0	0	0	2	0	0
k141_18064_1	0	0	0	0	0	0	0	4
k141_1809_3	0	0	0	8	0	0	0	0
k141_18114_1	0	0	0	4	0	0	0	0
k141_18123_1	0	0	0	0	2	0	0	0
k141_18144_1	0	0	0	2	0	0	0	0
k141_18144_2	0	0	0	6	0	0	0	0
k141_18162_1	0	0	0	10	0	0	0	0
k141_18169_2	0	0	0	10	0	0	0	0
k141_18215_1	0	0	0	14	0	0	0	0
k141_18268_1	0	0	0	4	0	0	0	0
k141_183_1	0	0	0	32	0	0	0	0
k141_18302_1	0	0	4	0	0	0	0	0
k141_18305_1	0	0	2	0	0	0	0	0
k141_1831_1	0	0	0	14	0	0	0	0
k141_1831_2	0	0	0	12	0	0	0	0
k141_18312_1	0	0	0	0	2	0	0	0
k141_18313_1	0	0	0	0	0	2	0	0
k141_18336_1	0	0	0	0	0	0	2	0
k141_18342_1	0	0	0	0	2	0	0	0
k141_18357_1	0	0	0	2	0	0	0	0
k141_18364_1	0	0	0	0	0	6	0	0
k141_18420_1	0	0	0	16	0	0	0	0
k141_18425_1	0	0	0	0	2	0	0	0
k141_18478_2	0	0	0	0	0	2	0	0
k141_18486_1	0	0	0	0	2	0	0	0
k141_1850_1	0	0	0	2	0	0	0	0
k141_18583_1	0	0	0	0	0	0	2	0
k141_18587_2	0	0	0	24	0	0	0	0
k141_18593_2	0	0	0	2	0	0	0	0
k141_18616_1	0	0	0	0	0	0	2	0
k141_18618_1	0	0	0	8	0	0	0	0
k141_18652_1	0	0	0	24	0	0	0	0
k141_1867_1	0	0	0	24	0	0	0	0
k141_18723_1	0	0	0	0	2	0	0	0
k141_1873_1	0	0	0	18	0	0	0	0
k141_18730_12	272	0	0	4	0	0	0	0
k141_18730_5	16862	0	0	0	0	0	4	0
k141_18730_9	16138	0	2	0	0	0	0	0
k141_18808_2	0	0	0	0	6	0	0	0
k141_18814_1	0	0	2	0	0	0	0	0
k141_18815_1	0	0	0	0	0	0	2	0
k141_1882_2	0	0	0	4	0	0	0	0
k141_18822_2	0	0	0	0	0	2	0	0
k141_1883_2	0	0	0	0	0	0	0	8
k141_18836_1	0	0	0	0	0	2	0	0
k141_18859_2	0	0	0	0	4	0	0	0
k141_18871_2	0	0	0	14	0	0	0	0
k141_18874_1	0	0	0	0	0	0	2	0
k141_18883_1	0	0	0	0	0	4	0	0
k141_18916_1	0	0	0	10	0	0	0	0
k141_18922_1	0	0	0	0	0	2	0	0
k141_18970_1	0	0	0	12	0	0	0	0
k141_18976_1	0	0	0	2	0	0	0	0
k141_19017_1	0	0	0	8	0	0	0	0
k141_19047_1	0	0	0	4	0	0	0	0
k141_19051_1	0	0	0	0	2	0	0	0
k141_19067_3	0	0	0	8	0	0	0	0
k141_19083_1	0	0	0	6	0	0	0	0
k141_191_1	0	0	0	2	0	0	0	0
k141_19105_1	0	0	0	0	0	0	0	2
k141_19106_1	0	0	0	0	0	0	0	2
k141_1912_1	0	0	0	8	0	0	0	0
k141_19171_2	0	0	0	0	0	2	0	0
k141_19175_1	0	0	2	0	0	0	0	0
k141_19178_1	0	0	0	2	0	0	0	0
k141_19181_1	0	0	0	4	0	0	0	0
k141_1921_1	0	0	0	0	2	0	0	0
k141_19235_2	0	0	0	0	8	0	0	0
k141_1925_1	0	0	2	0	0	0	0	0
k141_19308_2	0	0	0	12	0	0	0	0
k141_19361_1	0	0	0	0	2	0	0	0
k141_19362_1	0	0	0	0	0	2	0	0
k141_19367_1	0	0	0	0	0	0	0	2
k141_1937_2	0	0	4	0	0	0	0	0
k141_19383_1	0	0	0	28	0	0	0	0
k141_19393_1	0	0	0	10	0	0	0	0
k141_19400_1	0	0	0	32	0	0	0	0
k141_19400_2	0	0	0	20	0	0	0	0
k141_19425_1	0	0	0	14	0	0	0	0
k141_19430_1	0	0	0	0	0	0	2	0
k141_19433_1	0	0	0	20	0	0	0	0
k141_19439_8	0	0	4	0	0	0	0	0
k141_19443_1	0	0	0	4	0	0	0	0
k141_19449_1	0	0	0	2	0	0	0	0
k141_19493_1	0	0	0	16	0	0	0	0
k141_19493_2	0	0	0	10	0	0	0	0
k141_19494_1	0	0	0	6	0	0	0	0
k141_19552_2	0	0	0	6	0	0	0	0
k141_19559_1	0	0	0	14	0	0	0	0
k141_19598_2	0	0	0	6	0	0	0	0
k141_19602_1	0	0	0	4	0	0	0	0
k141_19634_1	0	0	0	30	0	0	0	0
k141_19636_1	0	0	0	0	4	0	0	0
k141_19641_2	0	0	0	4	0	0	0	0
k141_1965_1	0	0	0	8	0	0	0	0
k141_19672_1	0	0	0	0	0	2	0	0
k141_19701_1	0	0	0	4	0	0	0	0
k141_19723_1	0	0	0	12	0	0	0	0
k141_19723_2	0	0	0	8	0	0	0	0
k141_19732_2	0	0	0	26	0	0	0	0
k141_19749_2	0	0	0	0	0	0	2	0
k141_19770_1	0	0	0	8	0	0	0	0
k141_19773_1	0	0	0	10	0	0	0	0
k141_19775_1	0	0	0	4	0	0	0	0
k141_19775_2	0	0	0	2	0	0	0	0
k141_19799_1	0	0	0	0	2	0	0	0
k141_19800_1	0	0	0	0	0	2	0	0
k141_19804_1	0	0	0	8	0	0	0	0
k141_19804_2	0	0	0	22	0	0	0	0
k141_19806_1	0	0	2	0	0	0	0	0
k141_19823_2	0	0	0	6	0	0	0	0
k141_19842_1	0	0	0	4	0	0	0	0
k141_19842_2	0	0	0	2	0	0	0	0
k141_19853_1	0	0	0	10	0	0	0	0
k141_19859_1	0	0	0	2	0	0	0	0
k141_19859_2	0	0	0	2	0	0	0	0
k141_19869_2	0	0	0	0	0	0	6	0
k141_19892_1	0	0	0	26	0	0	0	0
k141_19910_1	0	0	0	0	0	0	2	0
k141_19913_1	0	0	0	6	0	0	0	0
k141_19939_1	0	0	2	0	0	0	0	0
k141_19981_1	0	0	0	6	0	0	0	0
k141_19984_1	0	0	0	18	0	0	0	0
k141_20039_2	0	0	0	6	0	0	0	0
k141_20054_1	0	0	0	4	0	0	0	0
k141_20055_1	0	0	0	0	0	0	2	0
k141_20066_1	0	0	0	0	0	0	2	0
k141_20092_5	0	0	0	0	0	0	2	0
k141_20094_1	0	0	0	4	0	0	0	0
k141_20118_1	0	0	0	2	0	0	0	0
k141_20140_1	2	0	0	0	0	0	2	0
k141_20149_1	0	0	0	0	2	0	0	0
k141_20166_1	0	0	0	12	0	0	0	0
k141_2017_1	0	0	0	34	0	0	0	0
k141_20171_1	0	0	2	0	0	0	0	0
k141_20172_1	0	0	0	6	0	0	0	0
k141_20172_2	0	0	0	8	0	0	0	0
k141_20182_2	0	0	0	0	0	0	2	0
k141_20202_1	0	0	0	10	0	0	0	0
k141_20229_1	0	0	0	0	2	0	0	0
k141_20292_1	0	0	0	0	0	0	10	0
k141_20296_2	0	0	0	4	0	0	0	0
k141_20300_1	0	0	0	0	0	0	2	0
k141_20317_1	0	0	0	10	0	0	0	0
k141_20317_2	0	0	0	6	0	0	0	0
k141_20325_2	0	0	0	18	0	0	0	0
k141_2034_1	0	0	0	20	0	0	0	0
k141_20346_1	0	0	0	4	0	0	0	0
k141_20352_1	0	0	0	28	0	0	0	0
k141_20369_1	0	0	0	0	0	0	4	0
k141_20388_3	0	0	0	2	0	0	0	0
k141_20462_2	0	0	0	2	0	0	0	0
k141_20501_1	0	0	0	0	0	2	0	0
k141_20503_11	4538	0	0	0	0	2	0	0
k141_20503_17	7264	0	0	0	0	0	2	0
k141_20503_18	7198	0	0	0	2	0	0	0
k141_20503_23	11226	0	0	4	0	0	0	0
k141_20503_3	21436	0	8	0	0	0	0	0
k141_20503_37	7990	0	2	0	0	0	0	0
k141_20503_4	22892	0	0	0	6	0	0	0
k141_20503_43	13338	0	0	0	2	0	0	0
k141_20514_3	0	0	4	0	0	0	0	0
k141_20533_3	0	0	0	14	0	0	0	0
k141_20567_1	0	0	0	10	0	0	0	0
k141_20568_1	0	0	0	0	4	0	0	0
k141_20610_1	0	0	0	10	0	0	0	0
k141_20612_2	0	0	0	0	0	0	2	0
k141_20623_2	0	0	0	14	0	0	0	0
k141_20637_1	0	0	2	0	0	0	0	0
k141_20639_3	0	0	0	2	0	0	0	0
k141_20648_1	0	0	0	8	0	0	0	0
k141_2065_3	0	0	0	8	0	0	0	0
k141_20664_1	0	0	2	0	0	0	0	0
k141_20678_1	0	0	0	6	0	0	0	0
k141_20719_1	0	0	0	2	0	0	0	0
k141_20741_2	0	0	0	8	0	0	0	0
k141_20744_1	0	0	0	6	0	0	0	0
k141_20751_2	0	0	0	10	0	0	0	0
k141_20787_1	0	0	0	18	0	0	0	0
k141_20837_1	0	0	0	0	0	2	0	0
k141_2085_1	0	0	0	0	0	0	2	0
k141_20862_1	0	0	0	0	0	0	6	0
k141_2088_1	0	0	0	0	0	0	2	0
k141_20887_1	0	0	0	2	0	0	0	0
k141_20924_2	0	0	0	0	0	0	2	0
k141_20941_1	0	0	0	0	0	2	0	0
k141_20944_1	0	0	0	0	0	2	0	0
k141_20986_1	0	0	0	18	0	0	0	0
k141_21007_1	0	0	0	0	0	2	0	0
k141_21012_1	0	0	0	0	2	0	0	0
k141_21028_1	0	0	0	0	2	0	0	0
k141_21029_1	0	0	0	2	0	0	0	0
k141_21036_2	0	0	4	0	0	0	0	0
k141_21046_1	0	0	0	0	0	2	0	0
k141_21057_1	0	0	0	12	0	0	0	0
k141_21070_1	0	0	0	0	2	0	0	0
k141_21075_1	2	0	0	0	2	0	0	0
k141_21088_1	0	0	0	12	0	0	0	0
k141_21101_1	0	0	0	0	0	2	0	0
k141_21116_2	0	0	0	2	0	0	0	0
k141_21165_1	0	0	0	0	2	0	0	0
k141_21167_3	0	0	0	6	0	0	0	0
k141_21189_2	0	0	0	6	0	0	0	0
k141_21328_1	2	0	0	0	0	2	0	0
k141_21343_1	0	0	0	2	0	0	0	0
k141_21350_2	0	0	0	8	0	0	0	0
k141_21367_1	0	0	0	4	0	0	0	0
k141_2137_1	0	0	0	0	2	0	0	0
k141_21372_1	0	0	0	0	0	0	2	0
k141_21374_1	0	0	0	0	0	0	0	2
k141_21385_1	0	0	0	0	0	4	0	0
k141_21446_1	0	0	0	18	0	0	0	0
k141_21467_1	0	0	0	0	0	2	0	0
k141_21471_1	0	0	0	20	0	0	0	0
k141_21474_1	0	0	0	0	0	0	0	2
k141_21482_1	0	0	0	8	0	0	0	0
k141_21516_1	0	0	2	0	0	0	0	0
k141_21537_1	0	0	0	0	0	0	2	0
k141_21551_2	0	0	0	2	0	0	0	0
k141_21581_1	0	0	0	4	0	0	0	0
k141_21596_1	0	0	0	12	0	0	0	0
k141_21607_1	0	0	0	4	0	0	0	0
k141_21646_1	0	0	0	8	0	0	0	0
k141_21680_1	0	0	0	0	0	0	2	0
k141_21681_2	0	0	0	20	0	0	0	0
k141_21687_1	0	0	0	0	0	0	2	0
k141_21697_1	0	0	0	0	2	0	0	0
k141_21700_2	0	0	0	4	0	0	0	0
k141_2171_1	0	0	0	6	0	0	0	0
k141_21714_3	0	0	0	0	2	0	0	0
k141_21718_2	0	0	0	0	0	0	2	0
k141_21724_1	0	0	0	0	2	0	0	0
k141_21731_1	2	0	0	0	0	0	2	0
k141_21763_1	0	0	0	2	0	0	0	0
k141_21808_1	0	0	0	28	0	0	0	0
k141_2181_2	0	0	0	6	0	0	0	0
k141_21834_1	0	0	0	4	0	0	0	0
k141_21848_1	0	0	0	0	0	0	14	0
k141_21866_1	0	0	0	0	0	0	2	0
k141_2187_1	0	0	0	18	0	0	0	0
k141_21880_1	0	0	0	0	0	2	0	0
k141_21888_1	0	0	0	0	0	2	0	0
k141_21892_1	0	0	0	16	0	0	0	0
k141_21893_1	0	0	0	10	0	0	0	0
k141_2191_3	0	0	0	0	0	0	0	4
k141_21944_1	0	0	0	0	0	2	0	0
k141_21956_1	0	0	0	2	0	0	0	0
k141_21966_1	0	0	2	0	0	0	0	0
k141_21976_2	0	0	0	12	0	0	0	0
k141_2198_1	0	0	0	0	0	0	0	2
k141_21985_3	5574	0	0	0	0	0	2	0
k141_21999_1	0	0	0	0	0	0	2	0
k141_22012_2	0	0	0	2	0	0	0	0
k141_2205_2	0	0	0	10	0	0	0	0
k141_22064_3	0	0	0	8	0	0	0	0
k141_22064_4	0	0	0	4	0	0	0	0
k141_22068_1	0	0	0	22	0	0	0	0
k141_22091_1	0	0	0	10	0	0	0	0
k141_22100_1	0	0	0	2	0	0	0	0
k141_22114_1	2	0	0	8	0	0	0	0
k141_22129_1	0	0	0	0	0	2	0	0
k141_22303_1	0	0	0	0	2	0	0	0
k141_22304_1	0	0	0	0	0	0	2	0
k141_22325_1	0	0	2	0	0	0	0	0
k141_22328_1	0	0	0	40	0	0	0	0
k141_22344_1	0	0	0	4	0	0	0	0
k141_22374_2	0	0	0	20	0	0	0	0
k141_22374_3	0	0	0	8	0	0	0	0
k141_22378_1	0	0	0	0	2	0	0	0
k141_22384_1	0	0	0	28	0	0	0	0
k141_22391_1	0	0	0	6	0	0	0	0
k141_22399_2	0	0	0	26	0	0	0	0
k141_22427_1	0	0	0	14	0	0	0	0
k141_2243_1	0	0	0	14	0	0	0	0
k141_22431_1	0	0	0	0	0	2	0	0
k141_22468_1	0	0	2	0	0	0	0	0
k141_2250_1	0	0	0	20	0	0	0	0
k141_22584_1	0	0	0	4	0	0	0	0
k141_22584_2	0	0	0	6	0	0	0	0
k141_22594_1	0	0	0	20	0	0	0	0
k141_22595_1	0	0	6	0	0	0	0	0
k141_22599_1	0	0	0	2	0	0	0	0
k141_22614_1	0	0	0	4	0	0	0	0
k141_22617_1	0	0	0	4	0	0	0	0
k141_2263_1	0	0	0	0	2	0	0	0
k141_22630_1	0	0	0	0	0	0	0	8
k141_22641_1	0	0	0	8	0	0	0	0
k141_22653_1	0	0	0	24	0	0	0	0
k141_22700_1	0	0	0	8	0	0	0	0
k141_22705_1	0	0	0	0	0	0	2	0
k141_22708_1	0	0	0	18	0	0	0	0
k141_22708_2	0	0	0	14	0	0	0	0
k141_22765_2	0	0	0	0	2	0	0	0
k141_22782_1	0	0	0	12	0	0	0	0
k141_22807_1	0	0	0	0	2	0	0	0
k141_22809_2	0	0	0	4	0	0	0	0
k141_22810_2	0	0	0	4	0	0	0	0
k141_22813_2	0	0	0	0	0	2	0	0
k141_22818_1	0	0	0	2	0	0	0	0
k141_22828_1	0	0	0	12	0	0	0	0
k141_22844_2	0	0	0	14	0	0	0	0
k141_22847_2	0	0	2	0	0	0	0	0
k141_22916_1	0	0	0	26	0	0	0	0
k141_22944_2	0	0	0	36	0	0	0	0
k141_22949_1	0	0	0	0	0	0	0	12
k141_22985_1	0	0	0	0	0	0	2	0
k141_22986_1	0	0	0	10	0	0	0	0
k141_230_1	0	0	2	0	0	0	0	0
k141_23017_1	0	0	0	6	0	0	0	0
k141_23017_2	0	0	0	4	0	0	0	0
k141_23020_1	0	0	0	4	0	0	0	0
k141_23024_1	0	0	0	2	0	0	0	0
k141_23024_2	0	0	0	24	0	0	0	0
k141_23031_1	0	0	0	0	6	0	0	0
k141_23047_1	0	0	0	2	0	0	0	0
k141_23047_5	0	0	0	0	0	2	0	0
k141_23048_1	0	0	0	12	0	0	0	0
k141_23060_1	2	0	0	0	0	0	2	0
k141_23103_1	0	0	0	16	0	0	0	0
k141_23103_2	0	0	0	12	0	0	0	0
k141_23123_1	0	0	0	12	0	0	0	0
k141_23145_1	0	0	0	0	2	0	0	0
k141_23146_1	0	0	0	10	0	0	0	0
k141_23147_1	0	0	0	16	0	0	0	0
k141_23164_1	2	0	0	0	0	0	4	0
k141_23170_2	0	0	0	0	0	4	0	0
k141_23186_1	0	0	0	0	2	0	0	0
k141_23199_2	0	0	0	26	0	0	0	0
k141_23200_1	0	0	0	0	0	0	2	0
k141_23200_2	0	0	0	0	0	2	0	0
k141_23237_1	0	0	0	0	0	0	2	0
k141_23265_1	0	0	0	0	0	0	0	2
k141_23286_1	0	0	0	6	0	0	0	0
k141_23286_2	0	0	0	2	0	0	0	0
k141_23297_1	0	0	0	24	0	0	0	0
k141_23299_1	0	0	0	0	2	0	0	0
k141_23302_1	0	0	0	0	2	0	0	0
k141_23303_1	0	0	2	0	0	0	0	0
k141_23304_1	0	0	2	0	0	0	0	0
k141_23309_2	0	0	0	6	0	0	0	0
k141_23324_1	0	0	0	24	0	0	0	0
k141_23331_1	0	0	0	30	0	0	0	0
k141_23354_2	0	0	0	4	0	0	0	0
k141_23407_1	0	0	0	0	0	0	4	0
k141_2341_1	0	0	0	24	0	0	0	0
k141_23422_1	0	0	0	2	0	0	0	0
k141_23441_1	0	0	0	4	0	0	0	0
k141_23466_1	0	0	2	0	0	0	0	0
k141_23501_1	0	0	2	0	0	0	0	0
k141_23508_2	0	0	0	6	0	0	0	0
k141_23511_1	0	0	2	0	0	0	0	0
k141_23514_1	0	0	0	2	0	0	0	0
k141_23574_1	0	0	0	2	0	0	0	0
k141_2358_1	0	0	0	12	0	0	0	0
k141_23600_1	0	0	0	20	0	0	0	0
k141_23648_1	0	0	0	2	0	0	0	0
k141_23676_2	0	0	0	2	0	0	0	0
k141_2369_1	0	0	0	20	0	0	0	0
k141_23691_1	0	0	0	14	0	0	0	0
k141_237_3	0	0	0	0	0	0	2	0
k141_23719_1	0	0	0	0	0	0	2	0
k141_23738_4	0	0	0	0	2	0	0	0
k141_23744_1	0	0	0	0	0	0	2	0
k141_23749_2	0	0	0	2	0	0	0	0
k141_23751_1	0	0	0	0	2	0	0	0
k141_2380_1	0	0	0	16	0	0	0	0
k141_23806_1	2	0	2	0	0	0	0	0
k141_23813_1	0	0	2	0	0	0	0	0
k141_23813_2	0	0	0	6	0	0	0	0
k141_23828_2	0	0	0	4	0	0	0	0
k141_2383_1	0	0	0	22	0	0	0	0
k141_2383_2	0	0	0	4	0	0	0	0
k141_23834_1	0	0	0	0	0	0	0	2
k141_23850_1	0	0	0	10	0	0	0	0
k141_23864_1	0	0	0	2	0	0	0	0
k141_23865_1	0	0	0	6	0	0	0	0
k141_2387_1	0	0	0	0	0	0	2	0
k141_23875_1	0	0	0	0	0	0	2	0
k141_23879_1	0	0	0	0	0	0	0	2
k141_2389_2	0	0	0	8	0	0	0	0
k141_23893_1	0	0	0	0	0	2	0	0
k141_23911_1	0	0	0	6	0	0	0	0
k141_23926_1	0	0	0	6	0	0	0	0
k141_2393_2	0	0	0	2	0	0	0	0
k141_23934_1	2	0	2	0	0	0	0	0
k141_23962_1	0	0	0	0	0	0	0	2
k141_2398_1	0	0	0	0	0	0	4	0
k141_23992_2	0	0	0	8	0	0	0	0
k141_24006_2	0	0	0	18	0	0	0	0
k141_24034_1	0	0	0	10	0	0	0	0
k141_24053_1	0	0	0	20	0	0	0	0
k141_24075_2	0	0	0	14	0	0	0	0
k141_24076_1	0	0	0	6	0	0	0	0
k141_24076_2	0	0	0	20	0	0	0	0
k141_24083_2	0	0	0	2	0	0	0	0
k141_24089_1	0	0	0	8	0	0	0	0
k141_241_1	0	0	0	8	0	0	0	0
k141_24102_1	0	0	2	0	0	0	0	0
k141_24108_1	0	0	0	2	0	0	0	0
k141_24143_1	0	0	0	8	0	0	0	0
k141_2417_1	0	0	0	0	0	2	0	0
k141_24185_1	0	0	0	6	0	0	0	0
k141_24191_2	0	0	0	2	0	0	0	0
k141_24205_21	12000	0	2	0	0	0	0	0
k141_24205_30	5250	0	0	0	2	0	0	0
k141_24205_33	4210	0	0	10	0	0	0	0
k141_24205_38	4494	0	0	6	0	0	0	0
k141_24205_4	4544	0	0	0	2	0	0	0
k141_24213_1	0	0	0	36	0	0	0	0
k141_24223_2	0	0	0	4	0	0	0	0
k141_24250_1	0	0	4	0	0	0	0	0
k141_24271_1	0	0	0	0	0	0	2	0
k141_24279_2	0	0	0	0	0	2	0	0
k141_24281_1	0	0	0	0	0	2	0	0
k141_24306_3	0	0	2	0	0	0	0	0
k141_24349_1	0	0	0	14	0	0	0	0
k141_24354_1	0	0	0	32	0	0	0	0
k141_24373_2	0	0	0	8	0	0	0	0
k141_24385_1	0	0	0	0	0	2	0	0
k141_24387_1	0	0	0	4	0	0	0	0
k141_2439_2	0	0	0	4	0	0	0	0
k141_24396_1	0	0	0	0	2	0	0	0
k141_24410_1	0	0	0	14	0	0	0	0
k141_24415_1	0	0	0	14	0	0	0	0
k141_24421_1	0	0	0	8	0	0	0	0
k141_24433_2	0	0	0	12	0	0	0	0
k141_24436_1	2	0	0	0	0	2	0	0
k141_24458_1	0	0	0	6	0	0	0	0
k141_24487_1	0	0	0	20	0	0	0	0
k141_2449_1	0	0	0	4	0	0	0	0
k141_24529_1	4	0	0	0	0	0	2	0
k141_24545_1	0	0	0	0	0	2	0	0
k141_24562_1	0	0	0	0	0	2	0	0
k141_24575_1	0	0	0	2	0	0	0	0
k141_24575_2	0	0	0	6	0	0	0	0
k141_24584_1	0	0	2	0	0	0	0	0
k141_24592_1	0	0	0	2	0	0	0	0
k141_24595_1	0	0	2	0	0	0	0	0
k141_24596_1	0	0	0	0	0	4	0	0
k141_24620_1	0	0	0	4	0	0	0	0
k141_24638_1	0	0	0	4	0	0	0	0
k141_24652_1	0	0	0	4	0	0	0	0
k141_24665_1	0	0	0	8	0	0	0	0
k141_24668_1	0	0	0	0	0	2	0	0
k141_24693_1	0	0	0	22	0	0	0	0
k141_24694_1	0	0	0	2	0	0	0	0
k141_24696_1	0	0	0	18	0	0	0	0
k141_24742_1	0	0	0	0	2	0	0	0
k141_24743_1	0	0	0	0	0	2	0	0
k141_24755_2	0	0	0	0	2	0	0	0
k141_24798_1	0	0	0	22	0	0	0	0
k141_24806_1	0	0	0	12	0	0	0	0
k141_2481_2	0	0	0	2	0	0	0	0
k141_24818_1	0	0	0	24	0	0	0	0
k141_24829_1	0	0	0	14	0	0	0	0
k141_24834_1	0	0	0	12	0	0	0	0
k141_24935_1	0	0	0	0	0	0	0	2
k141_24939_1	0	0	0	22	0	0	0	0
k141_24942_1	0	0	0	0	0	0	0	6
k141_24955_1	0	0	0	0	0	0	0	10
k141_24989_1	0	0	0	0	2	0	0	0
k141_25023_2	0	0	0	4	0	0	0	0
k141_25033_1	0	0	0	0	2	0	0	0
k141_25049_1	0	0	0	8	0	0	0	0
k141_25055_4	0	0	0	0	0	0	2	0
k141_25078_2	0	0	0	2	0	0	0	0
k141_25137_2	0	0	0	14	0	0	0	0
k141_2523_1	0	0	0	0	0	0	0	4
k141_25230_2	0	0	0	2	0	0	0	0
k141_25233_1	0	0	0	6	0	0	0	0
k141_25325_1	0	0	0	0	0	0	0	6
k141_25362_1	0	0	0	0	0	0	2	0
k141_25385_2	0	0	0	16	0	0	0	0
k141_25392_2	0	0	0	4	0	0	0	0
k141_25440_1	0	0	0	0	2	0	0	0
k141_25462_1	0	0	0	2	0	0	0	0
k141_25527_1	0	0	0	24	0	0	0	0
k141_2553_1	0	0	0	16	0	0	0	0
k141_25552_1	0	0	0	0	2	0	0	0
k141_25566_1	0	0	0	0	2	0	0	0
k141_25568_2	0	0	0	2	0	0	0	0
k141_2559_3	0	0	0	6	0	0	0	0
k141_25623_1	0	0	0	0	0	2	0	0
k141_25644_1	0	0	0	0	2	0	0	0
k141_25684_1	0	0	0	8	0	0	0	0
k141_25707_1	0	0	0	0	2	0	0	0
k141_25713_2	0	0	0	14	0	0	0	0
k141_25716_1	2	0	2	0	0	0	0	0
k141_25726_1	0	0	0	0	0	0	0	2
k141_25799_1	0	0	0	0	0	2	0	0
k141_25844_3	0	0	0	10	0	0	0	0
k141_25855_1	0	0	2	0	0	0	0	0
k141_25883_1	0	0	0	14	0	0	0	0
k141_25898_1	0	0	0	8	0	0	0	0
k141_25912_1	0	0	0	0	6	0	0	0
k141_25925_1	0	0	0	4	0	0	0	0
k141_2593_1	0	0	0	16	0	0	0	0
k141_25939_1	0	0	0	0	0	0	0	2
k141_2594_1	0	0	0	6	0	0	0	0
k141_2595_1	0	0	0	6	0	0	0	0
k141_25953_2	0	0	0	10	0	0	0	0
k141_25962_1	0	0	0	0	0	2	0	0
k141_25977_1	0	0	0	2	0	0	0	0
k141_25989_1	0	0	0	0	4	0	0	0
k141_26010_2	0	0	0	12	0	0	0	0
k141_26048_1	0	0	0	12	0	0	0	0
k141_26116_1	0	0	0	0	0	0	4	0
k141_26131_1	0	0	0	12	0	0	0	0
k141_26134_1	0	0	2	0	0	0	0	0
k141_26142_2	0	0	2	0	0	0	0	0
k141_26188_1	0	0	0	0	0	0	0	4
k141_26244_1	2	0	2	0	0	0	0	0
k141_26268_1	0	0	0	4	0	0	0	0
k141_26279_5	7590	0	0	0	0	2	0	0
k141_26293_1	2	0	2	0	0	0	0	0
k141_26293_4	0	0	0	0	0	0	2	0
k141_26293_5	0	0	0	0	0	0	2	0
k141_26298_1	0	0	2	0	0	0	0	0
k141_26313_1	0	0	2	0	0	0	0	0
k141_26330_6	8642	0	0	0	2	0	0	0
k141_26350_1	0	0	0	12	0	0	0	0
k141_26381_1	0	0	0	0	0	0	2	0
k141_26411_1	0	0	0	4	0	0	0	0
k141_26445_1	0	0	0	20	0	0	0	0
k141_26446_1	0	0	0	2	0	0	0	0
k141_26457_1	0	0	2	0	0	0	0	0
k141_2649_1	0	0	0	2	0	0	0	0
k141_2649_2	0	0	0	16	0	0	0	0
k141_26499_1	0	0	2	0	0	0	0	0
k141_26512_1	0	0	0	26	0	0	0	0
k141_26537_1	0	0	0	2	0	0	0	0
k141_26672_1	0	0	0	60	0	0	0	0
k141_26742_1	0	0	0	0	0	2	0	0
k141_26826_2	0	0	0	0	2	0	0	0
k141_26835_1	0	0	0	0	2	0	0	0
k141_26836_1	0	0	0	0	0	0	4	0
k141_26842_1	0	0	0	0	0	2	0	0
k141_26843_2	0	0	0	0	0	2	0	0
k141_26895_2	0	0	0	0	2	0	0	0
k141_26990_1	0	0	0	0	0	0	2	0
k141_2700_1	0	0	0	24	0	0	0	0
k141_27012_1	0	0	0	8	0	0	0	0
k141_27030_2	0	0	0	0	0	0	0	4
k141_27052_1	0	0	0	0	0	0	0	2
k141_27097_1	0	0	0	0	0	0	2	0
k141_271_1	0	0	0	0	4	0	0	0
k141_2714_1	0	0	0	4	0	0	0	0
k141_2714_2	0	0	0	24	0	0	0	0
k141_27165_1	0	0	0	50	0	0	0	0
k141_27199_2	0	0	0	0	0	0	2	0
k141_27245_1	0	0	0	14	0	0	0	0
k141_27260_1	0	0	2	0	0	0	0	0
k141_27263_1	0	0	0	18	0	0	0	0
k141_2729_1	0	0	0	2	0	0	0	0
k141_27300_1	0	0	0	4	0	0	0	0
k141_27318_2	0	0	2	0	0	0	0	0
k141_27325_1	0	0	0	4	0	0	0	0
k141_27359_1	0	0	0	12	0	0	0	0
k141_27375_1	0	0	0	0	2	0	0	0
k141_27379_1	0	0	2	0	0	0	0	0
k141_27384_1	0	0	0	0	0	2	0	0
k141_27387_1	4	0	0	0	0	2	0	0
k141_27395_2	0	0	0	4	0	0	0	0
k141_27432_1	0	0	0	8	0	0	0	0
k141_27441_1	0	0	0	2	0	0	0	0
k141_27455_1	0	0	0	18	0	0	0	0
k141_27482_1	0	0	0	0	0	2	0	0
k141_27494_1	0	0	0	2	0	0	0	0
k141_27494_2	0	0	0	30	0	0	0	0
k141_27529_1	0	0	0	6	0	0	0	0
k141_27543_1	0	0	0	0	2	0	0	0
k141_27558_1	0	0	0	0	0	0	2	0
k141_27567_1	0	0	0	6	0	0	0	0
k141_27573_1	0	0	0	0	2	0	0	0
k141_27586_1	0	0	0	0	2	0	0	0
k141_27639_1	0	0	0	6	0	0	0	0
k141_27656_1	0	0	0	2	0	0	0	0
k141_27661_1	0	0	0	0	4	0	0	0
k141_27663_1	0	0	0	20	0	0	0	0
k141_27685_1	0	0	0	0	0	2	0	0
k141_27690_1	0	0	0	12	0	0	0	0
k141_27692_1	0	0	0	0	0	0	2	0
k141_27698_1	0	0	2	0	0	0	0	0
k141_27722_1	0	0	0	8	0	0	0	0
k141_27727_1	0	0	0	16	0	0	0	0
k141_27762_1	0	0	0	20	0	0	0	0
k141_27783_2	0	0	2	0	0	0	0	0
k141_27785_1	2	0	0	0	0	2	0	0
k141_27786_1	0	0	0	46	0	0	0	0
k141_2782_1	0	0	0	10	0	0	0	0
k141_27822_2	0	0	2	0	0	0	0	0
k141_27827_1	0	0	0	0	2	0	0	0
k141_27844_1	0	0	0	28	0	0	0	0
k141_2785_1	0	0	0	2	0	0	0	0
k141_2787_2	0	0	0	0	0	0	0	2
k141_27879_1	0	0	0	4	0	0	0	0
k141_27879_2	0	0	0	26	0	0	0	0
k141_27902_1	0	0	0	68	0	0	0	0
k141_27931_1	0	0	2	0	0	0	0	0
k141_27932_1	0	0	0	14	0	0	0	0
k141_27934_2	0	0	0	20	0	0	0	0
k141_27948_1	0	0	0	4	0	0	0	0
k141_2795_1	0	0	4	0	0	0	0	0
k141_2802_2	0	0	0	48	0	0	0	0
k141_28036_1	0	0	0	2	0	0	0	0
k141_28144_1	0	0	0	0	0	0	2	0
k141_28165_2	0	0	0	2	0	0	0	0
k141_28170_1	0	0	0	0	0	0	4	0
k141_28183_1	0	0	0	10	0	0	0	0
k141_28192_1	0	0	0	6	0	0	0	0
k141_28194_1	0	0	0	0	2	0	0	0
k141_28213_1	0	0	0	6	0	0	0	0
k141_28243_1	0	0	0	0	0	0	0	6
k141_28250_1	0	0	2	0	0	0	0	0
k141_28345_1	0	0	0	20	0	0	0	0
k141_28358_1	0	0	2	0	0	0	0	0
k141_28359_1	222	0	0	2	0	0	0	0
k141_28384_1	0	0	0	24	0	0	0	0
k141_28384_2	0	0	0	6	0	0	0	0
k141_28386_2	0	0	0	20	0	0	0	0
k141_28388_1	0	0	0	0	0	2	0	0
k141_28404_1	0	0	0	18	0	0	0	0
k141_28415_1	0	0	0	0	2	0	0	0
k141_28435_1	0	0	0	18	0	0	0	0
k141_28438_2	0	0	0	20	0	0	0	0
k141_2845_1	0	0	0	0	0	4	0	0
k141_28452_1	0	0	0	0	0	0	0	4
k141_28461_1	0	0	2	0	0	0	0	0
k141_28475_1	0	0	0	8	0	0	0	0
k141_28514_2	0	0	0	10	0	0	0	0
k141_28584_1	0	0	2	0	0	0	0	0
k141_28610_1	0	0	0	2	0	0	0	0
k141_28616_1	0	0	0	6	0	0	0	0
k141_28616_2	0	0	0	2	0	0	0	0
k141_28617_1	0	0	0	0	2	0	0	0
k141_2862_1	0	0	0	4	0	0	0	0
k141_2863_2	0	0	0	10	0	0	0	0
k141_28636_1	0	0	0	0	0	2	0	0
k141_28656_1	0	0	0	10	0	0	0	0
k141_2867_2	0	0	0	14	0	0	0	0
k141_28702_1	0	0	0	0	0	0	0	2
k141_28704_1	0	0	0	12	0	0	0	0
k141_28730_1	0	0	0	16	0	0	0	0
k141_28738_1	0	0	0	4	0	0	0	0
k141_28746_1	0	0	0	4	0	0	0	0
k141_28767_1	0	0	0	6	0	0	0	0
k141_28783_1	0	0	0	10	0	0	0	0
k141_28797_1	0	0	0	12	0	0	0	0
k141_28801_1	0	0	0	26	0	0	0	0
k141_28814_1	0	0	0	4	0	0	0	0
k141_28814_2	0	0	0	14	0	0	0	0
k141_28817_1	0	0	0	0	0	2	0	0
k141_28823_1	0	0	0	18	0	0	0	0
k141_28823_2	0	0	0	6	0	0	0	0
k141_28855_1	0	0	0	0	0	2	0	0
k141_28865_1	0	0	0	16	0	0	0	0
k141_28872_1	0	0	0	0	0	2	0	0
k141_28877_1	0	0	0	24	0	0	0	0
k141_28886_1	0	0	0	8	0	0	0	0
k141_28887_2	0	0	0	24	0	0	0	0
k141_28898_1	0	0	0	26	0	0	0	0
k141_28902_2	0	0	0	16	0	0	0	0
k141_28920_1	8676	0	2	0	0	0	0	0
k141_28920_11	11150	0	0	0	0	0	2	0
k141_28920_9	9884	0	0	0	0	0	2	0
k141_28936_1	0	0	0	12	0	0	0	0
k141_2894_1	0	0	0	0	0	0	0	2
k141_28949_1	0	0	0	12	0	0	0	0
k141_28949_2	0	0	0	2	0	0	0	0
k141_28959_1	0	0	0	0	0	0	2	0
k141_28961_1	0	0	0	0	0	2	0	0
k141_28963_1	0	0	2	0	0	0	0	0
k141_28969_1	0	0	0	2	0	0	0	0
k141_28987_2	0	0	0	0	2	0	0	0
k141_28990_1	0	0	0	0	6	0	0	0
k141_28994_1	0	0	0	2	0	0	0	0
k141_29015_1	0	0	0	0	0	0	2	0
k141_29028_1	0	0	2	0	0	0	0	0
k141_29051_2	0	0	0	10	0	0	0	0
k141_29079_1	0	0	0	34	0	0	0	0
k141_29123_2	0	0	0	0	0	2	0	0
k141_29130_2	0	0	0	2	0	0	0	0
k141_29151_1	0	0	0	8	0	0	0	0
k141_29189_1	0	0	0	0	2	0	0	0
k141_29209_1	0	0	0	20	0	0	0	0
k141_29235_1	0	0	0	20	0	0	0	0
k141_29241_1	0	0	0	2	0	0	0	0
k141_29246_1	0	0	0	0	0	2	0	0
k141_29263_1	0	0	0	16	0	0	0	0
k141_29274_1	0	0	2	0	0	0	0	0
k141_29295_21	9912	0	0	0	0	0	4	0
k141_29295_32	1694	0	0	0	0	2	0	0
k141_29295_38	20458	0	0	0	0	2	0	0
k141_29295_4	11352	0	0	0	2	0	0	0
k141_29295_41	17462	0	0	0	0	0	2	0
k141_29295_45	798	0	2	0	0	0	0	0
k141_29295_50	4060	0	0	0	0	0	2	0
k141_29295_56	9780	0	0	0	0	2	0	0
k141_29295_58	16966	0	0	0	0	0	4	0
k141_29295_6	13520	0	2	0	0	0	0	0
k141_29295_65	3422	0	0	0	0	2	0	0
k141_29295_75	17332	0	0	14	0	0	0	0
k141_29295_8	5784	0	0	2	0	0	0	0
k141_29295_91	23544	0	8	0	0	0	0	0
k141_29295_97	800	0	0	0	2	0	0	0
k141_29295_99	5226	0	2	0	0	0	0	0
k141_29314_1	0	0	0	4	0	0	0	0
k141_2932_6	0	0	0	0	0	0	2	0
k141_29337_1	0	0	0	0	0	2	0	0
k141_29374_1	0	0	2	0	0	0	0	0
k141_2940_1	0	0	0	0	2	0	0	0
k141_29403_1	0	0	0	0	2	0	0	0
k141_29405_1	0	0	2	0	0	0	0	0
k141_2942_1	0	0	0	8	0	0	0	0
k141_29444_2	0	0	0	4	0	0	0	0
k141_29457_1	0	0	0	0	6	0	0	0
k141_29467_1	0	0	0	18	0	0	0	0
k141_29481_1	0	0	0	4	0	0	0	0
k141_29488_1	0	0	0	0	0	0	2	0
k141_29500_1	0	0	0	18	0	0	0	0
k141_29544_1	0	0	0	0	0	2	0	0
k141_29567_1	0	0	0	16	0	0	0	0
k141_29569_1	0	0	0	8	0	0	0	0
k141_29597_2	0	0	0	8	0	0	0	0
k141_29611_1	0	0	0	0	0	4	0	0
k141_29614_2	0	0	0	4	0	0	0	0
k141_29618_1	0	0	0	0	2	0	0	0
k141_29631_1	0	0	0	2	0	0	0	0
k141_29631_2	0	0	0	8	0	0	0	0
k141_29651_1	0	0	0	4	0	0	0	0
k141_29654_1	0	0	0	0	2	0	0	0
k141_29662_2	0	0	0	8	0	0	0	0
k141_29673_1	0	0	0	0	0	2	0	0
k141_29674_1	0	0	0	4	0	0	0	0
k141_29699_2	0	0	0	28	0	0	0	0
k141_2970_1	0	0	0	12	0	0	0	0
k141_29716_2	0	0	0	22	0	0	0	0
k141_29719_1	0	0	0	0	2	0	0	0
k141_29721_2	0	0	0	2	0	0	0	0
k141_29721_3	0	0	0	18	0	0	0	0
k141_29725_1	0	0	0	0	0	0	2	0
k141_29751_1	0	0	0	32	0	0	0	0
k141_29758_1	0	0	0	24	0	0	0	0
k141_29760_1	0	0	0	2	0	0	0	0
k141_29822_5	0	0	0	0	0	2	0	0
k141_29822_9	0	0	0	0	2	0	0	0
k141_29840_2	0	0	0	2	0	0	0	0
k141_29865_3	0	0	0	8	0	0	0	0
k141_29903_1	0	0	0	4	0	0	0	0
k141_29903_2	0	0	0	26	0	0	0	0
k141_29903_3	0	0	0	2	0	0	0	0
k141_29946_1	0	0	0	8	0	0	0	0
k141_29988_1	0	0	0	0	4	0	0	0
k141_30018_1	2	0	0	0	0	2	0	0
k141_3004_1	0	0	0	42	0	0	0	0
k141_30077_1	0	0	2	0	0	0	0	0
k141_30088_1	0	0	0	14	0	0	0	0
k141_30103_1	0	0	0	10	0	0	0	0
k141_30104_1	0	0	0	2	0	0	0	0
k141_30121_1	0	0	2	0	0	0	0	0
k141_30126_1	0	0	0	0	0	0	2	0
k141_30135_1	0	0	0	0	0	0	2	0
k141_30135_2	0	0	0	0	0	0	4	0
k141_30135_3	0	0	0	6	0	0	0	0
k141_30142_2	0	0	0	2	0	0	0	0
k141_30199_2	0	0	0	0	0	2	0	0
k141_302_2	0	0	0	4	0	0	0	0
k141_302_3	0	0	0	18	0	0	0	0
k141_30205_10	9630	0	0	0	2	0	0	0
k141_30205_18	24648	0	0	0	0	2	0	0
k141_30205_2	10416	0	0	0	0	0	2	0
k141_30205_30	17218	0	0	0	0	0	2	0
k141_30205_37	16770	0	0	0	0	0	2	0
k141_30205_38	14012	0	0	0	0	0	2	0
k141_30205_47	7388	0	0	6	0	0	0	0
k141_30205_8	7170	0	0	0	0	0	6	0
k141_30209_3	0	0	0	0	0	2	0	0
k141_3021_1	0	0	0	32	0	0	0	0
k141_3022_1	0	0	0	42	0	0	0	0
k141_3024_1	0	0	0	16	0	0	0	0
k141_30248_1	0	0	0	20	0	0	0	0
k141_30335_1	0	0	0	8	0	0	0	0
k141_30335_2	0	0	0	4	0	0	0	0
k141_30344_1	0	0	0	10	0	0	0	0
k141_30344_2	0	0	0	8	0	0	0	0
k141_30346_1	0	0	0	12	0	0	0	0
k141_30381_2	0	0	2	0	0	0	0	0
k141_30399_1	0	0	0	0	0	0	0	2
k141_30413_2	0	0	0	0	2	0	0	0
k141_30446_1	0	0	0	2	0	0	0	0
k141_30486_1	0	0	0	0	4	0	0	0
k141_30489_1	0	0	0	2	0	0	0	0
k141_30499_1	0	0	0	14	0	0	0	0
k141_305_1	0	0	0	0	2	0	0	0
k141_30512_1	0	0	0	18	0	0	0	0
k141_30512_2	0	0	0	14	0	0	0	0
k141_3053_1	0	0	0	0	4	0	0	0
k141_30535_1	0	0	0	10	0	0	0	0
k141_30541_1	0	0	0	42	0	0	0	0
k141_30549_1	0	0	4	0	0	0	0	0
k141_30555_2	0	0	0	8	0	0	0	0
k141_30565_1	0	0	0	4	0	0	0	0
k141_30565_2	0	0	0	4	0	0	0	0
k141_30577_1	0	0	0	4	0	0	0	0
k141_30577_2	0	0	0	14	0	0	0	0
k141_30581_1	2	0	0	0	0	2	0	0
k141_30600_1	0	0	0	4	0	0	0	0
k141_30600_2	0	0	0	6	0	0	0	0
k141_30600_3	0	0	0	2	0	0	0	0
k141_30613_1	0	0	0	0	2	0	0	0
k141_30624_1	0	0	0	0	0	8	0	0
k141_30661_3	0	0	0	0	0	0	0	16
k141_30681_1	0	0	0	0	0	0	6	0
k141_30780_1	0	0	0	30	0	0	0	0
k141_30796_2	0	0	0	26	0	0	0	0
k141_3080_1	0	0	4	0	0	0	0	0
k141_30806_2	0	0	0	6	0	0	0	0
k141_30825_1	0	0	0	0	0	0	8	0
k141_30848_1	0	0	0	0	0	0	0	2
k141_30867_1	0	0	0	0	2	0	0	0
k141_3087_1	0	0	0	8	0	0	0	0
k141_30884_1	0	0	0	0	0	6	0	0
k141_3089_1	0	0	2	0	0	0	0	0
[truncated: 12,118 more rows]

## Sheet: Supplementary Table S2
Supplementary Table S2 The shared genes between cecal content samples and negative control in metagenomic dataset
gene id	P	N	C1	C2	C3	C4	C5	C6
k141_100318_2	0	2	0	2	0	0	0	0
k141_10032_2	0	2	0	28	0	0	0	0
k141_100330_2	0	2	0	20	0	0	0	0
k141_100354_2	0	2	0	40	0	0	0	0
k141_100588_1	0	2	0	6	0	0	0	0
k141_100660_1	0	2	0	6	0	0	0	0
k141_100705_1	0	2	0	4	0	0	0	0
k141_100949_1	0	2	0	4	0	0	0	0
k141_101357_1	0	2	0	24	0	0	0	0
k141_10146_1	0	2	0	10	0	0	0	0
k141_101575_4	13150	2	2	0	0	0	0	0
k141_101575_5	7198	2	0	0	0	0	2	0
k141_101575_6	10504	2	0	0	0	2	0	0
k141_101589_1	0	2	0	18	0	0	0	0
k141_101606_2	0	2	0	2	0	0	0	0
k141_101648_1	0	2	0	12	0	0	0	0
k141_101801_1	0	2	0	20	0	0	0	0
k141_101967_1	0	2	0	60	0	0	0	0
k141_102022_1	0	2	0	16	0	0	0	0
k141_102023_1	0	2	0	4	0	0	0	0
k141_102133_1	0	2	0	20	0	0	0	0
k141_102206_2	0	2	0	2	0	0	0	0
k141_102284_1	0	2	0	18	0	0	0	0
k141_102295_1	0	2	0	2	0	0	0	0
k141_10234_4	0	2	0	16	0	0	0	0
k141_10241_1	0	2	2	0	0	0	0	0
k141_102522_1	0	2	0	2	0	0	0	0
k141_102687_3	0	2	0	8	0	0	0	0
k141_102941_1	0	2	0	16	0	0	0	0
k141_103083_2	0	2	0	38	0	0	0	0
k141_103317_1	0	2	0	8	0	0	0	0
k141_103347_1	0	2	0	20	0	0	0	0
k141_103503_2	0	2	0	4	0	0	0	0
k141_103661_2	0	2	0	14	0	0	0	0
k141_1038_13	15688	2	0	0	0	0	2	0
k141_1038_6	22760	2	0	0	0	0	4	0
k141_103960_1	0	2	0	24	0	0	0	0
k141_104002_1	0	2	0	0	2	0	0	0
k141_104031_4	0	2	0	18	0	0	0	0
k141_104214_1	0	2	0	18	0	0	0	0
k141_104474_1	0	2	0	16	0	0	0	0
k141_104604_1	0	2	0	14	0	0	0	0
k141_104667_1	0	2	0	50	0	0	0	0
k141_104700_1	0	2	0	16	0	0	0	0
k141_10476_1	0	2	0	6	0	0	0	0
k141_104987_2	0	2	0	16	0	0	0	0
k141_105216_1	0	2	0	16	0	0	0	0
k141_105261_1	0	2	0	24	0	0	0	0
k141_105367_1	0	2	0	12	0	0	0	0
k141_10538_39	25884	2	2	0	0	0	0	0
k141_10538_52	13356	2	0	4	0	0	0	0
k141_10538_6	20686	2	0	0	0	0	2	0
k141_105422_1	0	2	0	4	0	0	0	0
k141_10544_1	0	2	0	22	0	0	0	0
k141_105440_2	0	2	0	4	0	0	0	0
k141_105652_1	0	2	0	10	0	0	0	0
k141_105665_1	0	2	0	32	0	0	0	0
k141_105687_1	0	2	0	58	0	0	0	0
k141_105726_1	0	2	0	44	0	0	0	0
k141_105797_1	0	2	0	0	0	0	0	2
k141_105972_1	0	2	0	24	0	0	0	0
k141_105986_12	3388	2	0	2	0	0	0	0
k141_105986_8	15144	2	0	0	0	0	2	0
k141_105986_9	12638	2	0	0	2	0	0	0
k141_10639_1	0	2	0	6	0	0	0	0
k141_106500_1	0	2	0	2	0	0	0	0
k141_106915_1	0	2	0	6	0	0	0	0
k141_106933_1	0	2	0	30	0	0	0	0
k141_106956_1	0	2	0	28	0	0	0	0
k141_106995_2	0	2	0	6	0	0	0	0
k141_107326_2	0	2	0	20	0	0	0	0
k141_107428_1	0	2	0	6	0	0	0	0
k141_107465_1	0	2	0	42	0	0	0	0
k141_107488_1	0	2	0	10	0	0	0	0
k141_107558_1	0	2	0	2	0	0	0	0
k141_10763_1	0	2	0	82	0	0	0	0
k141_107703_1	0	2	0	8	0	0	0	0
k141_1078_1	0	2	0	38	0	0	0	0
k141_107888_1	0	2	0	42	0	0	0	0
k141_108354_1	0	2	0	32	0	0	0	0
k141_108383_2	0	2	0	2	0	0	0	0
k141_108403_2	0	2	0	18	0	0	0	0
k141_108428_1	0	2	0	14	0	0	0	0
k141_108498_1	0	2	0	16	0	0	0	0
k141_108648_4	0	2	0	34	0	0	0	0
k141_108756_1	0	2	0	40	0	0	0	0
k141_108801_1	0	2	0	4	0	0	0	0
k141_109072_1	0	2	0	26	0	0	0	0
k141_11020_2	0	2	0	12	0	0	0	0
k141_11111_1	0	2	0	0	2	0	0	0
k141_11186_1	0	2	0	26	0	0	0	0
k141_11468_3	0	2	0	22	0	0	0	0
k141_1149_1	0	2	0	0	0	2	0	0
k141_11510_1	0	2	0	10	0	0	0	0
k141_11628_1	0	2	0	6	0	0	0	0
k141_11645_1	0	2	0	22	0	0	0	0
k141_11741_1	0	2	0	16	0	0	0	0
k141_11812_1	0	2	0	12	0	0	0	0
k141_11890_2	0	2	0	6	0	0	0	0
k141_1210_1	0	2	0	32	0	0	0	0
k141_12102_1	0	2	0	20	0	0	0	0
k141_1225_1	0	2	0	2	0	0	0	0
k141_12414_1	0	2	0	30	0	0	0	0
k141_12439_1	0	2	0	22	0	0	0	0
k141_12511_1	0	2	0	2	0	0	0	0
k141_12573_2	0	2	0	6	0	0	0	0
k141_12592_1	0	2	0	20	0	0	0	0
k141_12731_1	0	2	0	12	0	0	0	0
k141_12767_1	0	2	0	10	0	0	0	0
k141_12767_2	0	2	0	54	0	0	0	0
k141_12775_1	0	2	0	14	0	0	0	0
k141_12777_1	0	2	0	8	0	0	0	0
k141_13023_1	0	2	0	8	0	0	0	0
k141_13071_1	0	2	0	18	0	0	0	0
k141_13100_1	0	2	0	14	0	0	0	0
k141_13141_1	0	2	0	10	0	0	0	0
k141_13236_2	0	2	0	36	0	0	0	0
k141_13249_1	0	2	0	56	0	0	0	0
k141_1329_1	0	2	0	32	0	0	0	0
k141_13351_3	13784	2	2	0	0	0	0	0
k141_134_1	0	2	0	8	0	0	0	0
k141_13648_1	0	2	0	8	0	0	0	0
k141_13740_2	0	2	0	2	0	0	0	0
k141_13754_62	20288	2	2	0	0	0	0	0
k141_13804_1	0	2	0	18	0	0	0	0
k141_13894_1	0	2	0	20	0	0	0	0
k141_14104_2	0	2	0	16	0	0	0	0
k141_14252_1	0	2	0	36	0	0	0	0
k141_14402_2	0	2	0	6	0	0	0	0
k141_14476_1	0	2	0	8	0	0	0	0
k141_14618_1	0	2	0	26	0	0	0	0
k141_14627_1	0	2	0	12	0	0	0	0
k141_14831_1	0	2	0	12	0	0	0	0
k141_150_1	0	2	0	12	0	0	0	0
k141_15091_2	0	2	0	2	0	0	0	0
k141_15103_1	0	2	0	2	0	0	0	0
k141_15134_2	0	2	0	2	0	0	0	0
k141_15173_1	0	2	0	18	0	0	0	0
k141_15200_1	0	2	0	38	0	0	0	0
k141_15309_2	0	2	0	12	0	0	0	0
k141_15420_4	0	2	0	28	0	0	0	0
k141_15542_38	5682	2	2	0	0	0	0	0
k141_15542_58	10774	2	0	0	2	0	0	0
k141_15637_1	0	2	0	0	6	0	0	0
k141_15690_14	13830	2	0	0	2	0	0	0
k141_15690_179	13708	2	0	0	0	0	4	0
k141_15690_181	16022	2	0	4	0	0	0	0
k141_15690_19	10536	2	0	0	4	0	0	0
k141_15690_31	31370	2	0	0	4	0	0	0
k141_15690_74	6798	2	2	0	0	0	0	0
k141_15914_1	0	2	0	8	0	0	0	0
k141_15934_28	15790	2	0	0	0	0	2	0
k141_15934_32	3492	2	0	0	0	2	0	0
k141_15939_2	0	2	0	18	0	0	0	0
k141_15990_2	0	2	0	18	0	0	0	0
k141_16327_1	0	2	0	30	0	0	0	0
k141_16349_1	0	2	0	0	6	0	0	0
k141_1640_1	0	2	0	32	0	0	0	0
k141_16434_1	0	2	0	12	0	0	0	0
k141_16434_2	0	2	0	16	0	0	0	0
k141_16543_1	0	2	0	28	0	0	0	0
k141_16768_1	0	2	0	4	0	0	0	0
k141_17004_2	0	2	0	16	0	0	0	0
k141_17129_2	0	2	0	6	0	0	0	0
k141_17287_1	0	2	0	54	0	0	0	0
k141_17318_1	0	2	0	38	0	0	0	0
k141_17422_1	0	2	0	6	0	0	0	0
k141_17623_116	9550	2	2	0	0	0	0	0
k141_17623_151	4600	2	0	4	0	0	0	0
k141_17623_164	1548	2	0	2	0	0	0	0
k141_17623_21	9044	2	0	0	0	0	2	0
k141_17623_216	1826	2	2	0	0	0	0	0
k141_17623_228	16316	2	0	0	2	0	0	0
k141_17623_253	10184	2	2	0	0	0	0	0
k141_17623_29	7956	2	0	0	0	2	0	0
k141_17623_294	9000	2	0	0	0	0	4	0
k141_17623_321	11712	2	0	0	4	0	0	0
k141_17623_331	8058	2	2	0	0	0	0	0
k141_17623_337	9920	2	2	0	0	0	0	0
k141_17623_348	3270	2	0	2	0	0	0	0
k141_17623_352	4610	2	0	0	2	0	0	0
k141_17623_61	9784	2	0	0	0	0	4	0
k141_17623_75	13358	2	0	0	0	0	2	0
k141_17623_76	2702	2	0	2	0	0	0	0
k141_17785_1	0	2	0	66	0	0	0	0
k141_17960_1	0	2	0	2	0	0	0	0
k141_18355_1	0	2	0	4	0	0	0	0
k141_18389_2	0	2	0	22	0	0	0	0
k141_1841_2	0	2	0	18	0	0	0	0
k141_18411_1	0	2	0	40	0	0	0	0
k141_1850_2	0	2	0	20	0	0	0	0
k141_18593_1	0	2	0	2	0	0	0	0
k141_18610_1	0	2	0	4	0	0	0	0
k141_18611_1	0	2	0	2	0	0	0	0
k141_18730_8	5988	2	0	0	2	0	0	0
k141_18777_1	0	2	0	4	0	0	0	0
k141_18791_1	0	2	0	14	0	0	0	0
k141_18871_1	0	2	0	14	0	0	0	0
k141_18931_1	0	2	0	8	0	0	0	0
k141_19300_1	0	2	0	8	0	0	0	0
k141_19449_2	0	2	0	6	0	0	0	0
k141_19516_1	0	2	0	14	0	0	0	0
k141_19575_1	0	2	0	0	6	0	0	0
k141_19598_1	0	2	0	8	0	0	0	0
k141_19678_2	0	2	0	2	0	0	0	0
k141_19707_1	0	2	0	26	0	0	0	0
k141_19868_1	0	2	0	0	2	0	0	0
k141_20016_1	0	2	0	12	0	0	0	0
k141_20111_1	0	2	0	58	0	0	0	0
k141_2021_1	0	2	0	24	0	0	0	0
k141_2040_1	0	2	0	6	0	0	0	0
k141_20503_33	8018	2	4	0	0	0	0	0
k141_20567_2	0	2	0	6	0	0	0	0
k141_20639_2	0	2	0	8	0	0	0	0
k141_2065_4	0	2	0	16	0	0	0	0
k141_20968_1	0	2	0	10	0	0	0	0
k141_21077_1	0	2	0	2	0	0	0	0
k141_21102_1	0	2	0	16	0	0	0	0
k141_21114_1	0	2	0	14	0	0	0	0
k141_21123_1	0	2	0	20	0	0	0	0
k141_21135_1	0	2	0	18	0	0	0	0
k141_21402_1	0	2	0	2	0	0	0	0
k141_21461_2	0	2	0	32	0	0	0	0
k141_21669_1	0	2	0	18	0	0	0	0
k141_21681_1	0	2	0	8	0	0	0	0
k141_21700_1	0	2	0	2	0	0	0	0
k141_2179_1	0	2	0	52	0	0	0	0
k141_21912_1	0	2	0	18	0	0	0	0
k141_22297_4	10152	2	2	0	0	0	0	0
k141_22297_6	12762	2	0	0	4	0	0	0
k141_22441_1	0	2	0	34	0	0	0	0
k141_22504_2	0	2	0	24	0	0	0	0
k141_22652_1	0	2	0	4	0	0	0	0
k141_22844_1	0	2	0	6	0	0	0	0
k141_23236_1	0	2	0	30	0	0	0	0
k141_23283_1	0	2	0	8	0	0	0	0
k141_23490_1	0	2	0	10	0	0	0	0
k141_23565_1	0	2	0	10	0	0	0	0
k141_23572_1	0	2	0	10	0	0	0	0
k141_23676_1	0	2	0	48	0	0	0	0
k141_23749_1	0	2	0	22	0	0	0	0
k141_23785_1	0	2	0	16	0	0	0	0
k141_23813_3	0	2	0	10	0	0	0	0
k141_23828_1	0	2	0	20	0	0	0	0
k141_23862_1	0	2	0	32	0	0	0	0
k141_23949_1	0	2	0	28	0	0	0	0
k141_24088_1	0	2	0	16	0	0	0	0
k141_24249_1	0	2	0	12	0	0	0	0
k141_24255_1	0	2	0	24	0	0	0	0
k141_24383_2	0	2	0	22	0	0	0	0
k141_24389_2	0	2	0	28	0	0	0	0
k141_24417_1	0	2	0	18	0	0	0	0
k141_24786_1	0	2	0	14	0	0	0	0
k141_2481_1	0	2	0	6	0	0	0	0
k141_2501_2	0	2	0	4	0	0	0	0
k141_25023_3	0	2	0	8	0	0	0	0
k141_2529_1	0	2	0	0	2	0	0	0
k141_25291_1	0	2	0	22	0	0	0	0
k141_25545_1	0	2	0	28	0	0	0	0
k141_2559_2	0	2	0	18	0	0	0	0
k141_25618_1	0	2	0	10	0	0	0	0
k141_25692_1	0	2	0	18	0	0	0	0
k141_25955_1	0	2	0	20	0	0	0	0
k141_26330_4	10692	2	0	0	2	0	0	0
k141_26671_1	0	2	0	10	0	0	0	0
k141_26758_1	0	2	0	10	0	0	0	0
k141_2678_1	0	2	0	8	0	0	0	0
k141_27088_1	0	2	0	14	0	0	0	0
k141_27274_1	0	2	0	2	0	0	0	0
k141_27438_1	0	2	0	6	0	0	0	0
k141_27927_1	0	2	0	26	0	0	0	0
k141_27990_1	0	2	0	8	0	0	0	0
k141_2803_2	0	2	0	22	0	0	0	0
k141_28100_1	0	2	0	28	0	0	0	0
k141_28165_1	0	2	0	10	0	0	0	0
k141_28357_1	0	2	0	40	0	0	0	0
k141_28409_1	0	2	0	6	0	0	0	0
k141_28505_2	0	2	0	0	2	0	0	0
k141_2863_1	0	2	0	18	0	0	0	0
k141_28690_1	0	2	0	32	0	0	0	0
k141_28754_3	0	2	0	14	0	0	0	0
k141_28880_1	0	2	0	4	0	0	0	0
k141_29295_16	10148	2	0	0	0	2	0	0
k141_29295_47	17146	2	0	0	2	0	0	0
k141_29295_61	4754	2	0	0	0	2	0	0
k141_29295_72	22132	2	0	2	0	0	0	0
k141_29295_80	5892	2	2	0	0	0	0	0
k141_29343_1	0	2	0	18	0	0	0	0
k141_29637_1	0	2	0	0	10	0	0	0
k141_30197_2	0	2	0	10	0	0	0	0
k141_30205_3	31470	2	2	0	0	0	0	0
k141_30269_2	0	2	0	2	0	0	0	0
k141_30364_1	0	2	0	10	0	0	0	0
k141_30467_1	0	2	0	12	0	0	0	0
k141_30561_1	0	2	0	16	0	0	0	0
k141_31133_1	0	2	0	10	0	0	0	0
k141_31190_3	0	2	0	14	0	0	0	0
k141_31377_1	0	2	0	10	0	0	0	0
k141_31578_1	0	2	0	2	0	0	0	0
k141_31588_3	0	2	0	12	0	0	0	0
k141_31631_1	0	2	0	20	0	0	0	0
k141_31699_1	0	2	0	16	0	0	0	0
k141_31740_1	0	2	0	18	0	0	0	0
k141_31814_1	0	2	0	46	0	0	0	0
k141_31860_2	0	2	0	2	0	0	0	0
k141_31865_1	0	2	0	12	0	0	0	0
k141_32163_1	0	2	0	16	0	0	0	0
k141_32214_1	0	2	0	10	0	0	0	0
k141_32245_2	0	2	0	12	0	0	0	0
k141_32309_1	0	2	0	30	0	0	0	0
k141_3247_1	0	2	0	22	0	0	0	0
k141_32541_1	0	2	0	54	0	0	0	0
k141_32580_1	0	2	0	12	0	0	0	0
k141_32627_2	0	2	0	24	0	0	0	0
k141_32662_1	0	2	0	14	0	0	0	0
k141_32726_1	0	2	0	10	0	0	0	0
k141_32753_1	0	2	0	8	0	0	0	0
k141_33055_1	0	2	0	32	0	0	0	0
k141_33079_1	0	2	0	12	0	0	0	0
k141_33116_2	0	2	0	12	0	0	0	0
k141_33156_4	0	2	0	8	0	0	0	0
k141_33227_1	0	2	0	12	0	0	0	0
k141_33394_1	0	2	0	14	0	0	0	0
k141_33570_1	0	2	0	14	0	0	0	0
k141_33660_1	0	2	0	4	0	0	0	0
k141_33682_1	0	2	0	26	0	0	0	0
k141_33831_1	0	2	0	36	0	0	0	0
k141_33848_3	0	2	0	12	0	0	0	0
k141_33885_2	0	2	0	48	0	0	0	0
k141_34463_1	0	2	0	8	0	0	0	0
k141_34565_2	0	2	0	12	0	0	0	0
k141_34585_1	0	2	0	8	0	0	0	0
k141_34612_2	0	2	0	10	0	0	0	0
k141_34939_1	0	2	0	8	0	0	0	0
k141_34970_1	0	2	0	14	0	0	0	0
k141_34989_1	0	2	0	14	0	0	0	0
k141_34996_1	0	2	0	22	0	0	0	0
k141_35234_1	0	2	0	20	0	0	0	0
k141_35250_26	8828	2	0	0	2	0	0	0
k141_35250_34	8510	2	0	0	0	0	2	0
k141_35250_37	2502	2	0	0	0	0	2	0
k141_35250_40	5264	2	0	0	2	0	0	0
k141_35250_53	10310	2	0	2	0	0	0	0
k141_35370_4	14350	2	0	0	2	0	0	0
k141_35379_2	0	2	0	2	0	0	0	0
k141_35506_2	0	2	0	20	0	0	0	0
k141_35507_1	0	2	0	0	2	0	0	0
k141_35589_42	42564	2	0	0	0	0	4	0
k141_35700_2	0	2	0	6	0	0	0	0
k141_35750_1	0	2	0	6	0	0	0	0
k141_3577_1	0	2	0	26	0	0	0	0
k141_35781_2	0	2	0	62	0	0	0	0
k141_35921_1	0	2	0	28	0	0	0	0
k141_35949_1	0	2	0	16	0	0	0	0
k141_36019_1	0	2	0	74	0	0	0	0
k141_361_1	0	2	0	4	0	0	0	0
k141_36146_1	0	2	0	36	0	0	0	0
k141_36361_1	0	2	0	6	0	0	0	0
k141_36563_1	0	2	0	12	0	0	0	0
k141_37154_1	0	2	0	2	0	0	0	0
k141_37273_1	0	2	0	4	0	0	0	0
k141_3752_1	0	2	0	10	0	0	0	0
k141_37968_1	0	2	0	4	0	0	0	0
k141_37995_1	0	2	0	16	0	0	0	0
k141_38016_1	0	2	0	10	0	0	0	0
k141_38068_1	0	2	0	10	0	0	0	0
k141_38244_1	0	2	0	8	0	0	0	0
k141_38258_1	0	2	0	20	0	0	0	0
k141_38345_1	0	2	0	30	0	0	0	0
k141_38345_2	0	2	0	10	0	0	0	0
k141_38371_1	0	2	0	12	0	0	0	0
k141_38610_1	0	2	0	38	0	0	0	0
k141_38732_1	0	2	0	18	0	0	0	0
k141_38733_2	0	2	0	10	0	0	0	0
k141_38962_2	0	2	0	26	0	0	0	0
k141_39030_22	6686	2	0	0	0	0	0	2
k141_39030_26	12090	2	0	0	2	0	0	0
k141_39030_31	7888	2	0	0	0	0	2	0
k141_39030_8	16334	2	0	0	0	2	0	0
k141_39163_1	0	2	0	6	0	0	0	0
k141_39328_2	0	2	0	2	0	0	0	0
k141_39330_2	0	2	0	6	0	0	0	0
k141_39421_2	0	2	0	36	0	0	0	0
k141_39522_1	0	2	0	14	0	0	0	0
k141_396_1	0	2	0	0	4	0	0	0
k141_39724_1	0	2	0	42	0	0	0	0
k141_3981_3	0	2	0	34	0	0	0	0
k141_39924_1	0	2	0	0	2	0	0	0
k141_40200_1	0	2	0	20	0	0	0	0
k141_40263_1	0	2	0	2	0	0	0	0
k141_40268_1	0	2	0	26	0	0	0	0
k141_40393_45	9732	2	2	0	0	0	0	0
k141_40398_2	0	2	0	16	0	0	0	0
k141_40758_1	0	2	0	18	0	0	0	0
k141_40779_1	0	2	0	36	0	0	0	0
k141_40855_1	0	2	0	18	0	0	0	0
k141_41281_2	0	2	0	36	0	0	0	0
k141_41313_1	0	2	0	12	0	0	0	0
k141_41450_1	0	2	0	26	0	0	0	0
k141_41453_1	0	2	0	14	0	0	0	0
k141_41492_5	8858	2	4	0	0	0	0	0
k141_41556_1	0	2	0	12	0	0	0	0
k141_4184_2	2	2	0	20	0	0	0	0
k141_42060_1	0	2	0	10	0	0	0	0
k141_42097_2	0	2	0	10	0	0	0	0
k141_42225_1	0	2	0	8	0	0	0	0
k141_42327_2	0	2	0	20	0	0	0	0
k141_42533_1	0	2	0	4	0	0	0	0
k141_4268_1	0	2	2	0	0	0	0	0
k141_42697_1	0	2	0	26	0	0	0	0
k141_42757_2	0	2	0	16	0	0	0	0
k141_42975_1	0	2	0	6	0	0	0	0
k141_43188_2	0	2	0	10	0	0	0	0
k141_43208_1	0	2	0	36	0	0	0	0
k141_43210_1	0	2	0	28	0	0	0	0
k141_43258_1	0	2	0	4	0	0	0	0
k141_43371_1	0	2	0	4	0	0	0	0
k141_43529_1	0	2	0	18	0	0	0	0
k141_43594_1	0	2	0	6	0	0	0	0
k141_43696_103	17494	2	2	0	0	0	0	0
k141_43696_106	12836	2	0	0	0	2	0	0
k141_43696_11	5008	2	2	0	0	0	0	0
k141_43696_151	5822	2	0	4	0	0	0	0
k141_43696_57	14922	2	0	6	0	0	0	0
k141_43720_1	0	2	0	2	0	0	0	0
k141_4384_1	0	2	0	22	0	0	0	0
k141_43927_1	0	2	0	30	0	0	0	0
k141_44037_1	0	2	0	10	0	0	0	0
k141_44052_21	10220	2	0	4	0	0	0	0
k141_44052_43	4780	2	2	0	0	0	0	0
k141_44052_5	11818	2	2	0	0	0	0	0
k141_44052_50	9948	2	0	0	0	0	2	0
k141_44052_63	5448	2	2	0	0	0	0	0
k141_44052_75	4544	2	0	0	0	0	2	0
k141_44052_84	16208	2	0	0	0	0	4	0
k141_4406_1	0	2	0	24	0	0	0	0
k141_44177_1	0	2	0	24	0	0	0	0
k141_44280_1	0	2	0	42	0	0	0	0
k141_44297_1	0	2	0	0	6	0	0	0
k141_44379_3	0	2	0	86	0	0	0	0
k141_44398_1	0	2	0	10	0	0	0	0
k141_44453_1	0	2	0	20	0	0	0	0
k141_4450_2	0	2	0	14	0	0	0	0
k141_44533_1	0	2	0	2	0	0	0	0
k141_44556_1	0	2	0	2	0	0	0	0
k141_4484_1	0	2	0	24	0	0	0	0
k141_44842_1	0	2	0	8	0	0	0	0
k141_44895_1	0	2	0	20	0	0	0	0
k141_44943_2	0	2	0	32	0	0	0	0
k141_45029_1	0	2	2	0	0	0	0	0
k141_45108_1	0	2	0	48	0	0	0	0
k141_45164_2	0	2	0	2	0	0	0	0
k141_45336_2	0	2	0	32	0	0	0	0
k141_45408_1	0	2	0	24	0	0	0	0
k141_45430_1	0	2	0	14	0	0	0	0
k141_45496_3	0	2	0	8	0	0	0	0
k141_45595_1	0	2	0	10	0	0	0	0
k141_4561_1	0	2	0	24	0	0	0	0
k141_45662_1	0	2	0	0	6	0	0	0
k141_45963_2	0	2	0	2	0	0	0	0
k141_45982_4	5724	2	0	0	0	2	0	0
k141_45990_1	0	2	0	24	0	0	0	0
k141_46080_1	0	2	0	32	0	0	0	0
k141_46350_1	0	2	0	10	0	0	0	0
k141_46401_1	0	2	0	34	0	0	0	0
k141_46441_1	0	2	0	20	0	0	0	0
k141_46613_1	0	2	0	10	0	0	0	0
k141_46623_10	15848	2	0	0	2	0	0	0
k141_46623_103	9756	2	0	2	0	0	0	0
k141_46623_107	22436	2	0	0	0	0	4	0
k141_46623_108	3396	2	2	0	0	0	0	0
k141_46623_122	5430	2	0	2	0	0	0	0
k141_46623_167	6566	2	0	6	0	0	0	0
k141_46623_20	15364	2	0	0	2	0	0	0
k141_46623_25	8238	2	0	6	0	0	0	0
k141_46623_41	15728	2	0	0	0	2	0	0
k141_46623_42	20494	2	2	0	0	0	0	0
k141_46623_86	12766	2	2	0	0	0	0	0
k141_46632_1	0	2	0	10	0	0	0	0
k141_4701_45	8492	2	0	0	0	0	2	0
k141_4701_5	7654	2	0	0	0	2	0	0
k141_4706_1	0	2	0	22	0	0	0	0
k141_47071_2	0	2	0	22	0	0	0	0
k141_47102_1	0	2	0	0	2	0	0	0
k141_47136_1	0	2	0	36	0	0	0	0
k141_4731_2	0	2	0	4	0	0	0	0
k141_47480_1	0	2	0	10	0	0	0	0
k141_47519_2	0	2	0	26	0	0	0	0
k141_47616_1	0	2	0	12	0	0	0	0
k141_47701_2	0	2	0	68	0	0	0	0
k141_47785_2	0	2	0	0	4	0	0	0
k141_47822_1	0	2	0	6	0	0	0	0
k141_4796_1	0	2	0	18	0	0	0	0
k141_48064_1	0	2	0	4	0	0	0	0
k141_48361_1	0	2	0	14	0	0	0	0
k141_48597_2	0	2	0	2	0	0	0	0
k141_48666_2	0	2	0	12	0	0	0	0
k141_48857_2	0	2	0	20	0	0	0	0
k141_49084_37	34374	2	0	0	0	0	2	0
k141_49084_56	2616	2	0	0	0	2	0	0
k141_49150_1	0	2	0	28	0	0	0	0
k141_49151_2	0	2	0	10	0	0	0	0
k141_49214_1	0	2	0	8	0	0	0	0
k141_49409_1	0	2	0	0	2	0	0	0
k141_49631_1	0	2	0	6	0	0	0	0
k141_49654_3	0	2	0	16	0	0	0	0
k141_49667_1	0	2	0	34	0	0	0	0
k141_49812_1	0	2	0	50	0	0	0	0
k141_50126_1	0	2	0	12	0	0	0	0
k141_50172_2	0	2	0	10	0	0	0	0
k141_50301_1	0	2	0	10	0	0	0	0
k141_50317_1	0	2	0	22	0	0	0	0
k141_50714_2	0	2	0	14	0	0	0	0
k141_50743_3	0	2	0	24	0	0	0	0
k141_5086_1	0	2	0	22	0	0	0	0
k141_50920_34	11220	2	0	0	0	2	0	0
k141_50953_1	0	2	0	6	0	0	0	0
k141_51023_2	0	2	0	8	0	0	0	0
k141_5117_1	0	2	0	14	0	0	0	0
k141_51194_1	0	2	0	14	0	0	0	0
k141_51208_1	0	2	0	2	0	0	0	0
k141_51227_1	0	2	0	38	0	0	0	0
k141_51379_1	0	2	0	20	0	0	0	0
k141_51531_1	0	2	0	4	0	0	0	0
k141_51653_2	5114	2	2	0	0	0	0	0
k141_5170_1	0	2	0	20	0	0	0	0
k141_51817_1	0	2	0	0	0	0	4	0
k141_52028_1	0	2	0	14	0	0	0	0
k141_52028_2	0	2	0	26	0	0	0	0
k141_52150_1	0	2	0	22	0	0	0	0
k141_52323_2	0	2	0	38	0	0	0	0
k141_52354_1	0	2	0	8	0	0	0	0
k141_52394_1	0	2	0	26	0	0	0	0
k141_52397_1	0	2	0	20	0	0	0	0
k141_52737_1	0	2	0	18	0	0	0	0
k141_52852_1	0	2	0	8	0	0	0	0
k141_52892_2	0	2	0	20	0	0	0	0
k141_5298_1	0	2	0	12	0	0	0	0
k141_53101_1	0	2	0	26	0	0	0	0
k141_53178_2	0	2	0	4	0	0	0	0
k141_53292_1	0	2	0	14	0	0	0	0
k141_5330_2	0	2	0	8	0	0	0	0
k141_53416_1	0	2	0	20	0	0	0	0
k141_53417_2	0	2	0	28	0	0	0	0
k141_53472_2	0	2	0	14	0	0	0	0
k141_53507_2	0	2	0	12	0	0	0	0
k141_53526_2	0	2	0	20	0	0	0	0
k141_53576_1	0	2	0	18	0	0	0	0
k141_53605_1	0	2	0	8	0	0	0	0
k141_53666_2	0	2	0	8	0	0	0	0
k141_5369_2	0	2	0	14	0	0	0	0
k141_53694_1	0	2	0	44	0	0	0	0
k141_53721_2	0	2	0	20	0	0	0	0
k141_54182_1	0	2	0	6	0	0	0	0
k141_54198_1	0	2	0	10	0	0	0	0
k141_54454_1	0	2	0	6	0	0	0	0
k141_54732_1	0	2	0	18	0	0	0	0
k141_54786_2	0	2	0	6	0	0	0	0
k141_54875_1	0	2	0	2	0	0	0	0
k141_54927_1	0	2	0	2	0	0	0	0
k141_54946_2	0	2	0	12	0	0	0	0
k141_5501_1	0	2	0	2	0	0	0	0
k141_55049_17	15760	2	0	0	0	2	0	0
k141_55049_24	24250	2	0	0	0	0	4	0
k141_55074_1	0	2	0	18	0	0	0	0
k141_55079_1	0	2	0	6	0	0	0	0
k141_55386_1	0	2	0	16	0	0	0	0
k141_55410_1	0	2	0	18	0	0	0	0
k141_5556_1	0	2	0	10	0	0	0	0
k141_55887_1	0	2	0	26	0	0	0	0
k141_56037_1	0	2	0	40	0	0	0	0
k141_56165_1	0	2	0	12	0	0	0	0
k141_5631_19	10498	2	0	6	0	0	0	0
k141_5631_27	13586	2	0	0	0	0	2	0
k141_5632_3	0	2	0	6	0	0	0	0
k141_56352_1	0	2	0	16	0	0	0	0
k141_56374_1	0	2	0	14	0	0	0	0
k141_56500_1	0	2	0	26	0	0	0	0
k141_5660_1	0	2	0	10	0	0	0	0
k141_56692_2	0	2	0	20	0	0	0	0
k141_56944_10	37230	2	0	0	0	0	6	0
k141_57003_2	0	2	0	6	0	0	0	0
k141_57112_1	0	2	0	44	0	0	0	0
k141_5723_1	0	2	0	16	0	0	0	0
k141_57258_2	0	2	0	16	0	0	0	0
k141_57309_1	0	2	0	10	0	0	0	0
k141_57545_1	0	2	0	32	0	0	0	0
k141_57606_1	0	2	0	4	0	0	0	0
k141_57631_1	0	2	0	42	0	0	0	0
k141_57790_2	0	2	0	8	0	0	0	0
k141_57981_1	0	2	0	16	0	0	0	0
k141_58064_1	0	2	0	8	0	0	0	0
k141_5807_1	0	2	0	8	0	0	0	0
k141_58097_1	0	2	0	20	0	0	0	0
k141_58195_1	0	2	0	8	0	0	0	0
k141_58341_2	0	2	0	2	0	0	0	0
k141_58361_1	0	2	0	6	0	0	0	0
k141_58467_2	0	2	0	18	0	0	0	0
k141_58648_1	0	2	0	10	0	0	0	0
k141_58830_2	0	2	0	2	0	0	0	0
k141_58865_1	0	2	0	4	0	0	0	0
k141_59388_2	0	2	0	12	0	0	0	0
k141_59513_5	52098	2	0	0	0	0	6	0
k141_59626_1	0	2	0	6	0	0	0	0
k141_59632_1	0	2	0	38	0	0	0	0
k141_59692_1	0	2	0	10	0	0	0	0
k141_59715_1	0	2	0	22	0	0	0	0
k141_59778_1	0	2	0	4	0	0	0	0
k141_59955_1	0	2	0	12	0	0	0	0
k141_60169_56	8976	2	0	0	0	0	4	0
k141_60245_1	0	2	0	22	0	0	0	0
k141_60270_1	0	2	0	48	0	0	0	0
k141_60372_1	0	2	0	4	0	0	0	0
k141_6064_2	0	2	0	8	0	0	0	0
k141_60731_1	0	2	0	30	0	0	0	0
k141_60731_2	0	2	0	10	0	0	0	0
k141_6097_1	0	2	0	18	0	0	0	0
k141_61134_1	0	2	0	36	0	0	0	0
k141_61274_2	0	2	0	16	0	0	0	0
k141_616_1	0	2	0	36	0	0	0	0
k141_62065_2	0	2	0	22	0	0	0	0
k141_62137_1	0	2	0	16	0	0	0	0
k141_62153_1	0	2	0	42	0	0	0	0
k141_62298_102	11984	2	0	0	0	0	2	0
k141_62298_116	9866	2	2	0	0	0	0	0
k141_62298_135	19600	2	0	0	0	0	2	0
k141_62298_185	15938	2	0	0	2	0	0	0
k141_62298_59	2772	2	0	4	0	0	0	0
k141_62298_73	18938	2	0	0	2	0	0	0
k141_62459_1	0	2	0	18	0	0	0	0
k141_62553_1	0	2	0	20	0	0	0	0
k141_62631_1	0	2	0	14	0	0	0	0
k141_62681_2	0	2	0	38	0	0	0	0
k141_62762_1	0	2	0	12	0	0	0	0
k141_6278_2	0	2	0	8	0	0	0	0
k141_62794_2	0	2	0	22	0	0	0	0
k141_62930_3	0	2	0	38	0	0	0	0
k141_62970_1	0	2	0	16	0	0	0	0
k141_63288_1	0	2	0	30	0	0	0	0
k141_63325_3	0	2	0	10	0	0	0	0
k141_63429_1	0	2	0	2	0	0	0	0
k141_63470_1	0	2	0	38	0	0	0	0
k141_63484_1	0	2	0	18	0	0	0	0
k141_63511_1	0	2	0	22	0	0	0	0
k141_63561_1	0	2	0	6	0	0	0	0
k141_63588_1	0	2	0	14	0	0	0	0
k141_6384_1	0	2	0	12	0	0	0	0
k141_63988_1	0	2	0	0	2	0	0	0
k141_64028_1	0	2	0	24	0	0	0	0
k141_64077_1	0	2	0	14	0	0	0	0
k141_64141_1	0	2	0	48	0	0	0	0
k141_64201_1	0	2	0	14	0	0	0	0
k141_64406_1	0	2	0	4	0	0	0	0
k141_64414_2	0	2	0	8	0	0	0	0
k141_64422_1	0	2	0	16	0	0	0	0
k141_64503_1	0	2	0	4	0	0	0	0
k141_6469_1	0	2	0	12	0	0	0	0
k141_64917_1	0	2	0	28	0	0	0	0
k141_65029_1	0	2	0	8	0	0	0	0
k141_65150_1	0	2	0	2	0	0	0	0
k141_65214_10	9500	2	0	0	0	0	2	0
k141_65214_24	12796	2	0	0	0	0	2	0
k141_65214_60	7100	2	0	0	0	0	0	2
k141_65436_2	0	2	0	16	0	0	0	0
k141_65462_1	0	2	0	16	0	0	0	0
k141_65533_1	0	2	0	16	0	0	0	0
k141_65603_1	0	2	0	2	0	0	0	0
k141_65896_1	0	2	0	18	0	0	0	0
k141_65941_2	0	2	0	2	0	0	0	0
k141_66098_1	0	2	0	40	0	0	0	0
k141_6610_1	0	2	0	12	0	0	0	0
k141_66225_1	0	2	0	24	0	0	0	0
k141_66294_18	2514	2	0	0	0	0	2	0
k141_66294_5	19316	2	0	0	0	0	2	0
k141_66608_1	0	2	0	34	0	0	0	0
k141_66965_26	13464	2	0	0	0	2	0	0
k141_66965_7	4468	2	0	0	0	2	0	0
k141_66985_1	0	2	0	16	0	0	0	0
k141_67129_20	21076	2	4	0	0	0	0	0
k141_67195_1	0	2	0	26	0	0	0	0
k141_67316_2	0	2	0	8	0	0	0	0
k141_67348_2	0	2	0	16	0	0	0	0
k141_67511_1	0	2	0	20	0	0	0	0
k141_67586_1	0	2	0	12	0	0	0	0
k141_67591_1	0	2	0	4	0	0	0	0
k141_67694_1	0	2	0	2	0	0	0	0
k141_67729_1	0	2	0	20	0	0	0	0
k141_67782_1	0	2	0	10	0	0	0	0
k141_67804_1	0	2	0	12	0	0	0	0
k141_67819_1	0	2	0	6	0	0	0	0
k141_67829_1	0	2	0	12	0	0	0	0
k141_67862_1	0	2	0	10	0	0	0	0
k141_67862_2	0	2	0	28	0	0	0	0
k141_68029_9	5606	2	0	6	0	0	0	0
k141_68043_2	0	2	0	6	0	0	0	0
k141_68323_1	0	2	0	30	0	0	0	0
k141_68348_3	0	2	0	16	0	0	0	0
k141_68382_1	0	2	0	10	0	0	0	0
k141_68579_1	0	2	0	16	0	0	0	0
k141_6892_2	0	2	0	12	0	0	0	0
k141_69021_1	0	2	0	2	0	0	0	0
k141_69070_1	0	2	0	16	0	0	0	0
k141_69104_1	0	2	0	40	0	0	0	0
k141_69217_2	0	2	0	22	0	0	0	0
k141_69341_1	0	2	0	18	0	0	0	0
k141_69409_1	0	2	0	22	0	0	0	0
k141_69569_1	0	2	0	22	0	0	0	0
k141_6961_1	0	2	0	20	0	0	0	0
k141_69750_1	0	2	0	0	0	0	0	4
k141_70089_1	0	2	0	4	0	0	0	0
k141_70448_1	0	2	0	42	0	0	0	0
k141_70701_2	0	2	0	18	0	0	0	0
k141_70764_1	0	2	0	0	2	0	0	0
k141_70889_2	0	2	0	6	0	0	0	0
k141_70895_2	0	2	0	8	0	0	0	0
k141_71010_2	0	2	0	0	2	0	0	0
k141_71011_1	0	2	0	26	0	0	0	0
k141_71432_1	0	2	0	8	0	0	0	0
k141_71573_1	0	2	0	14	0	0	0	0
k141_71698_1	0	2	0	44	0	0	0	0
k141_71903_1	0	2	0	18	0	0	0	0
k141_72020_1	0	2	0	30	0	0	0	0
k141_72021_1	0	2	0	24	0	0	0	0
k141_72032_1	0	2	0	12	0	0	0	0
k141_72109_1	0	2	0	24	0	0	0	0
k141_72185_2	0	2	0	30	0	0	0	0
k141_72291_1	0	2	0	2	0	0	0	0
k141_7239_1	0	2	0	16	0	0	0	0
k141_72639_5	0	2	0	4	0	0	0	0
k141_72710_3	0	2	0	22	0	0	0	0
k141_72774_2	0	2	0	18	0	0	0	0
k141_73447_1	0	2	0	40	0	0	0	0
k141_73667_1	0	2	0	6	0	0	0	0
k141_73805_1	0	2	0	32	0	0	0	0
k141_74134_1	0	2	0	0	6	0	0	0
k141_74286_1	0	2	0	12	0	0	0	0
k141_74347_1	0	2	0	34	0	0	0	0
k141_74490_1	0	2	0	18	0	0	0	0
k141_74546_1	0	2	0	0	6	0	0	0
k141_74632_1	0	2	0	18	0	0	0	0
k141_74747_1	0	2	0	56	0	0	0	0
k141_74888_30	5408	2	0	0	0	0	2	0
k141_74888_42	8006	2	0	0	0	0	2	0
k141_74888_45	8800	2	0	0	2	0	0	0
k141_74888_85	11218	2	0	2	0	0	0	0
k141_74888_86	10100	2	0	2	0	0	0	0
k141_74888_96	6830	2	0	0	0	0	2	0
k141_75442_1	0	2	0	6	0	0	0	0
k141_75497_2	0	2	0	24	0	0	0	0
k141_75617_1	0	2	0	6	0	0	0	0
k141_7566_6	10534	2	0	0	2	0	0	0
k141_75689_2	0	2	0	26	0	0	0	0
k141_7587_2	0	2	4	0	0	0	0	0
k141_76127_1	0	2	0	14	0	0	0	0
k141_76259_3	0	2	0	12	0	0	0	0
k141_7650_2	0	2	0	18	0	0	0	0
k141_76525_2	0	2	0	4	0	0	0	0
k141_76640_1	0	2	0	40	0	0	0	0
k141_76698_1	0	2	0	48	0	0	0	0
k141_76818_1	0	2	0	18	0	0	0	0
k141_76838_2	0	2	0	4	0	0	0	0
k141_7691_1	0	2	0	18	0	0	0	0
k141_77104_1	0	2	0	20	0	0	0	0
k141_77160_1	0	2	0	8	0	0	0	0
k141_77195_1	0	2	0	14	0	0	0	0
k141_77485_2	0	2	0	6	0	0	0	0
k141_77623_1	0	2	0	18	0	0	0	0
k141_7771_2	0	2	0	72	0	0	0	0
k141_7771_4	0	2	0	6	0	0	0	0
k141_7815_1	0	2	0	28	0	0	0	0
k141_78182_27	2416	2	2	0	0	0	0	0
k141_78182_55	8612	2	2	0	0	0	0	0
k141_78182_79	6674	2	0	0	0	0	2	0
k141_78182_83	8880	2	0	4	0	0	0	0
k141_78185_1	0	2	0	12	0	0	0	0
k141_78537_1	0	2	0	24	0	0	0	0
k141_78641_2	0	2	0	2	0	0	0	0
k141_78672_1	0	2	0	16	0	0	0	0
k141_78822_1	0	2	0	10	0	0	0	0
k141_78885_2	0	2	0	28	0	0	0	0
k141_790_1	0	2	0	20	0	0	0	0
k141_79102_1	0	2	0	20	0	0	0	0
k141_79317_1	0	2	0	20	0	0	0	0
k141_79455_2	0	2	0	10	0	0	0	0
k141_79770_2	0	2	0	16	0	0	0	0
k141_79834_1	0	2	0	18	0	0	0	0
k141_79948_2	0	2	0	6	0	0	0	0
k141_79986_2	0	2	0	18	0	0	0	0
k141_80086_1	0	2	4	0	0	0	0	0
k141_80472_1	0	2	0	16	0	0	0	0
k141_805_1	0	2	0	26	0	0	0	0
k141_80563_4	0	2	0	42	0	0	0	0
k141_80669_1	0	2	0	16	0	0	0	0
k141_80714_2	0	2	0	22	0	0	0	0
k141_80942_1	0	2	0	12	0	0	0	0
k141_81042_1	0	2	0	10	0	0	0	0
k141_81103_2	0	2	0	24	0	0	0	0
k141_8117_2	0	2	0	28	0	0	0	0
k141_8118_1	0	2	0	10	0	0	0	0
k141_81436_1	0	2	0	16	0	0	0	0
k141_81511_1	0	2	0	68	0	0	0	0
k141_81511_2	0	2	0	18	0	0	0	0
k141_81552_30	6622	2	0	0	0	2	0	0
k141_81552_79	17676	2	0	0	0	0	0	2
k141_81594_1	0	2	0	16	0	0	0	0
k141_82316_1	0	2	0	38	0	0	0	0
k141_82519_1	0	2	0	0	4	0	0	0
k141_82644_1	0	2	0	18	0	0	0	0
k141_82941_1	0	2	0	10	0	0	0	0
k141_83163_37	6092	2	0	0	0	0	2	0
k141_8370_1	0	2	0	4	0	0	0	0
k141_83733_2	0	2	0	8	0	0	0	0
k141_83803_2	0	2	0	14	0	0	0	0
k141_84159_1	0	2	0	10	0	0	0	0
k141_8419_1	0	2	0	10	0	0	0	0
k141_84286_2	0	2	0	12	0	0	0	0
k141_84320_1	0	2	0	2	0	0	0	0
k141_84331_1	0	2	0	6	0	0	0	0
k141_8480_107	10238	2	0	0	4	0	0	0
k141_8480_109	10324	2	0	0	2	0	0	0
k141_8480_130	11136	2	0	0	2	0	0	0
k141_8480_131	11304	2	0	0	2	0	0	0
k141_8480_140	16526	2	2	0	0	0	0	0
k141_8480_147	3396	2	0	0	2	0	0	0
k141_8480_167	6560	2	0	0	0	0	2	0
k141_8480_174	23008	2	0	0	0	2	0	0
k141_8480_184	21044	2	0	6	0	0	0	0
k141_8480_188	7874	2	0	0	0	2	0	0
k141_8480_26	8402	2	0	0	0	2	0	0
k141_8480_3	5812	2	0	0	2	0	0	0
k141_8480_80	13632	2	2	0	0	0	0	0
k141_84805_1	0	2	0	2	0	0	0	0
k141_84849_2	0	2	0	14	0	0	0	0
k141_84887_1	0	2	0	40	0	0	0	0
k141_84946_1	0	2	0	24	0	0	0	0
k141_85207_1	0	2	0	28	0	0	0	0
k141_8527_1	0	2	0	14	0	0	0	0
k141_85328_1	0	2	0	12	0	0	0	0
k141_85344_1	0	2	0	18	0	0	0	0
k141_85415_1	0	2	0	8	0	0	0	0
k141_85549_2	0	2	0	32	0	0	0	0
k141_8561_1	0	2	0	6	0	0	0	0
k141_86450_1	0	2	0	10	0	0	0	0
k141_8649_2	0	2	0	26	0	0	0	0
k141_86617_1	0	2	0	16	0	0	0	0
k141_867_2	0	2	0	2	0	0	0	0
k141_86774_2	2	2	0	14	0	0	0	0
k141_86776_1	0	2	0	8	0	0	0	0
k141_86779_1	0	2	0	10	0	0	0	0
k141_8678_2	0	2	0	18	0	0	0	0
k141_86862_2	0	2	0	18	0	0	0	0
k141_87253_1	0	2	0	22	0	0	0	0
k141_87459_1	0	2	0	8	0	0	0	0
k141_87541_1	0	2	0	38	0	0	0	0
k141_87661_1	0	2	6	0	0	0	0	0
k141_87696_1	0	2	0	2	0	0	0	0
k141_87945_103	11626	2	0	2	0	0	0	0
k141_87945_108	4222	2	0	6	0	0	0	0
k141_87945_166	7256	2	0	0	0	0	4	0
k141_87945_178	7060	2	0	6	0	0	0	0
k141_87945_183	7774	2	2	0	0	0	0	0
k141_87945_215	15220	2	4	0	0	0	0	0
k141_87945_267	9542	2	2	0	0	0	0	0
k141_87945_278	14902	2	0	0	0	0	2	0
k141_87945_48	23582	2	2	0	0	0	0	0
k141_87945_61	7094	2	0	0	2	0	0	0
k141_87945_62	15156	2	2	0	0	0	0	0
k141_87945_63	18924	2	2	0	0	0	0	0
k141_87988_1	0	2	0	0	8	0	0	0
k141_88853_1	0	2	0	10	0	0	0	0
k141_89196_1	0	2	0	6	0	0	0	0
k141_89371_2	0	2	0	2	0	0	0	0
k141_89433_1	0	2	0	6	0	0	0	0
k141_89591_1	0	2	0	0	2	0	0	0
k141_89872_2	0	2	0	34	0	0	0	0
k141_9015_1	0	2	0	26	0	0	0	0
k141_90157_2	0	2	0	4	0	0	0	0
k141_90288_2	0	2	0	26	0	0	0	0
k141_90450_1	0	2	0	26	0	0	0	0
k141_9051_1	0	2	0	28	0	0	0	0
k141_90717_2	0	2	0	14	0	0	0	0
k141_90731_1	0	2	0	10	0	0	0	0
k141_90840_37	15740	2	0	6	0	0	0	0
k141_90840_48	11348	2	2	0	0	0	0	0
k141_90840_88	23944	2	0	0	2	0	0	0
k141_91019_1	0	2	0	18	0	0	0	0
k141_91024_2	0	2	0	2	0	0	0	0
k141_91257_2	0	2	0	8	0	0	0	0
k141_91325_1	0	2	0	4	0	0	0	0
k141_9164_1	0	2	0	10	0	0	0	0
k141_91709_1	0	2	0	2	0	0	0	0
k141_91791_1	0	2	0	2	0	0	0	0
k141_91949_2	0	2	0	6	0	0	0	0
k141_92155_1	0	2	0	2	0	0	0	0
k141_92620_1	0	2	0	8	0	0	0	0
k141_93027_1	0	2	0	22	0	0	0	0
k141_93240_2	0	2	0	32	0	0	0	0
k141_93890_1	0	2	0	18	0	0	0	0
k141_94804_1	0	2	0	18	0	0	0	0
k141_94807_1	0	2	0	16	0	0	0	0
k141_95219_1	0	2	0	34	0	0	0	0
k141_95280_2	0	2	0	22	0	0	0	0
k141_95293_1	0	2	0	6	0	0	0	0
k141_95945_3	0	2	0	2	0	0	0	0
k141_96003_2	0	2	0	8	0	0	0	0
k141_96169_1	0	2	0	48	0	0	0	0
k141_96691_1	0	2	0	6	0	0	0	0
k141_96785_1	0	2	0	10	0	0	0	0
k141_96957_1	0	2	0	26	0	0	0	0
k141_97040_2	0	2	0	6	0	0	0	0
k141_97128_1	0	2	0	24	0	0	0	0
k141_97203_1	0	2	0	4	0	0	0	0
k141_97210_2	0	2	0	24	0	0	0	0
k141_97316_1	0	2	0	24	0	0	0	0
k141_97334_2	0	2	0	4	0	0	0	0
k141_97362_1	0	2	0	32	0	0	0	0
k141_97420_1	0	2	0	4	0	0	0	0
k141_97455_1	0	2	0	6	0	0	0	0
k141_97554_3	0	2	0	16	0	0	0	0
k141_97674_1	0	2	0	6	0	0	0	0
k141_97832_1	0	2	0	4	0	0	0	0
k141_97907_1	0	2	0	22	0	0	0	0
k141_97934_1	0	2	0	14	0	0	0	0
k141_98177_1	0	2	0	16	0	0	0	0
k141_9827_1	0	2	0	14	0	0	0	0
k141_98345_1	0	2	0	14	0	0	0	0
k141_98372_2	0	2	0	2	0	0	0	0
k141_98496_1	0	2	0	8	0	0	0	0
k141_9871_1	0	2	0	16	0	0	0	0
k141_9871_2	0	2	0	12	0	0	0	0
k141_98852_12	3708	2	0	0	0	0	0	2
k141_98852_40	1472	2	0	2	0	0	0	0
k141_98852_59	5696	2	0	0	0	0	2	0
k141_9888_2	0	2	0	18	0	0	0	0
k141_99193_1	0	2	0	24	0	0	0	0
k141_99244_1	0	2	0	4	0	0	0	0
k141_99355_21	19632	2	0	0	0	0	2	0
k141_99397_1	0	2	0	10	0	0	0	0
k141_99398_1	0	2	0	16	0	0	0	0
k141_99415_1	0	2	0	16	0	0	0	0
k141_10008_1	18	4	0	0	0	0	0	2
k141_100175_1	0	4	0	42	0	0	0	0
k141_10068_1	0	4	0	46	0	0	0	0
k141_100853_1	0	4	0	24	0	0	0	0
k141_101007_1	0	4	0	22	0	0	0	0
k141_101282_1	0	4	0	8	0	0	0	0
k141_101430_1	0	4	0	20	0	0	0	0
k141_101480_1	0	4	0	2	0	0	0	0
k141_101496_2	0	4	0	16	0	0	0	0
k141_101575_8	7192	4	0	0	2	0	0	0
k141_102039_2	0	4	0	4	0	0	0	0
k141_102136_3	0	4	0	12	0	0	0	0
k141_102178_1	0	4	0	12	0	0	0	0
k141_10234_1	0	4	0	14	0	0	0	0
k141_102632_1	0	4	0	22	0	0	0	0
k141_102730_3	0	4	0	10	0	0	0	0
k141_10277_1	0	4	0	24	0	0	0	0
k141_102772_1	0	4	0	14	0	0	0	0
k141_102796_1	0	4	0	26	0	0	0	0
k141_102940_1	0	4	0	12	0	0	0	0
k141_102964_1	0	4	0	24	0	0	0	0
k141_102969_1	0	4	0	18	0	0	0	0
k141_103027_2	0	4	0	26	0	0	0	0
k141_10312_1	0	4	0	22	0	0	0	0
k141_103194_1	0	4	0	36	0	0	0	0
k141_103194_2	0	4	0	26	0	0	0	0
k141_103730_1	0	4	0	12	0	0	0	0
k141_103964_1	0	4	0	4	0	0	0	0
k141_104031_1	0	4	0	16	0	0	0	0
k141_104082_1	0	4	0	12	0	0	0	0
k141_10443_1	0	4	0	10	0	0	0	0
k141_104447_1	0	4	0	38	0	0	0	0
k141_104625_1	0	4	0	14	0	0	0	0
k141_104729_1	0	4	0	32	0	0	0	0
k141_105226_1	0	4	0	16	0	0	0	0
k141_105252_1	0	4	0	14	0	0	0	0
k141_105324_1	0	4	0	16	0	0	0	0
k141_10538_45	21378	4	0	0	0	4	0	0
k141_10613_1	0	4	0	8	0	0	0	0
k141_106238_2	0	4	0	2	0	0	0	0
k141_107334_1	0	4	0	30	0	0	0	0
k141_107999_1	0	4	0	30	0	0	0	0
k141_108155_1	0	4	0	14	0	0	0	0
k141_108227_1	0	4	0	32	0	0	0	0
k141_108336_1	0	4	0	34	0	0	0	0
k141_108648_3	0	4	0	8	0	0	0	0
k141_108836_1	0	4	0	18	0	0	0	0
k141_10976_1	0	4	0	20	0	0	0	0
k141_1102_1	0	4	0	16	0	0	0	0
k141_11086_3	0	4	0	48	0	0	0	0
k141_11128_1	0	4	0	4	0	0	0	0
k141_11185_1	0	4	0	0	2	0	0	0
k141_11490_2	0	4	0	62	0	0	0	0
k141_11850_2	0	4	0	18	0	0	0	0
k141_11871_1	0	4	0	20	0	0	0	0
k141_11925_1	0	4	0	8	0	0	0	0
k141_11934_1	0	4	0	14	0	0	0	0
k141_1204_1	0	4	0	24	0	0	0	0
k141_12091_1	0	4	0	22	0	0	0	0
k141_1222_2	0	4	0	8	0	0	0	0
k141_12254_1	0	4	0	4	0	0	0	0
k141_12494_3	0	4	0	18	0	0	0	0
k141_12616_1	0	4	0	0	4	0	0	0
k141_12796_1	0	4	0	0	0	2	0	0
k141_12914_2	0	4	0	12	0	0	0	0
k141_13506_2	0	4	0	6	0	0	0	0
k141_13636_1	0	4	0	2	0	0	0	0
k141_13754_52	34698	4	4	0	0	0	0	0
k141_13919_2	0	4	0	18	0	0	0	0
k141_14139_1	0	4	0	44	0	0	0	0
k141_14164_1	0	4	0	38	0	0	0	0
k141_14182_1	0	4	0	24	0	0	0	0
k141_14402_3	0	4	0	10	0	0	0	0
k141_14438_2	0	4	0	2	0	0	0	0
k141_14589_1	0	4	0	18	0	0	0	0
k141_14715_1	0	4	0	10	0	0	0	0
k141_14737_2	0	4	0	8	0	0	0	0
k141_14781_2	0	4	0	32	0	0	0	0
k141_14943_1	0	4	0	28	0	0	0	0
k141_15123_1	0	4	0	20	0	0	0	0
k141_15379_2	0	4	0	38	0	0	0	0
k141_15405_1	0	4	0	2	0	0	0	0
k141_15690_135	11618	4	0	0	8	0	0	0
k141_15690_141	16086	4	0	0	0	0	2	0
k141_15690_184	6252	4	2	0	0	0	0	0
k141_15714_1	0	4	0	14	0	0	0	0
k141_15818_2	0	4	0	2	0	0	0	0
k141_15821_1	0	4	0	24	0	0	0	0
k141_1591_1	0	4	0	32	0	0	0	0
k141_15934_10	12164	4	0	0	2	0	0	0
k141_15934_33	11144	4	0	0	0	2	0	0
k141_15934_34	18498	4	0	0	2	0	0	0
k141_15934_46	10276	4	2	0	0	0	0	0
k141_15934_9	4980	4	0	0	0	0	0	2
k141_15975_2	0	4	0	8	0	0	0	0
k141_16150_1	0	4	0	32	0	0	0	0
k141_16438_1	0	4	0	28	0	0	0	0
k141_16655_2	0	4	0	6	0	0	0	0
k141_16722_1	0	4	0	42	0	0	0	0
k141_16737_1	0	4	0	12	0	0	0	0
k141_16913_1	0	4	0	6	0	0	0	0
k141_17062_1	0	4	0	2	0	0	0	0
k141_1710_1	0	4	0	42	0	0	0	0
k141_17245_1	0	4	0	14	0	0	0	0
k141_17623_160	8872	4	0	0	0	2	0	0
k141_17623_165	9140	4	2	0	0	0	0	0
k141_17623_269	27438	4	0	0	2	0	0	0
k141_17623_46	14348	4	0	0	0	2	0	0
k141_17623_84	13798	4	0	0	2	0	0	0
k141_17888_2	0	4	0	0	2	0	0	0
k141_17931_1	0	4	0	6	0	0	0	0
k141_1841_1	0	4	0	2	0	0	0	0
k141_18423_1	0	4	0	30	0	0	0	0
k141_18448_1	0	4	0	4	0	0	0	0
k141_18567_2	0	4	0	40	0	0	0	0
k141_19060_1	0	4	0	6	0	0	0	0
k141_19308_1	0	4	0	2	0	0	0	0
k141_1945_1	0	4	0	10	0	0	0	0
k141_1953_1	0	4	0	78	0	0	0	0
k141_19804_3	0	4	0	4	0	0	0	0
k141_20175_1	0	4	0	2	0	0	0	0
k141_20394_1	0	4	0	0	2	0	0	0
k141_20675_1	0	4	0	20	0	0	0	0
k141_20719_2	0	4	0	14	0	0	0	0
k141_20736_1	0	4	0	14	0	0	0	0
k141_21116_1	0	4	0	50	0	0	0	0
k141_21152_1	0	4	0	6	0	0	0	0
k141_21570_2	0	4	0	22	0	0	0	0
k141_21817_1	0	4	0	2	0	0	0	0
k141_21893_2	0	4	0	8	0	0	0	0
k141_21985_10	4482	4	0	0	0	0	2	0
k141_21985_6	4658	4	0	0	0	0	2	0
k141_21985_7	4590	4	0	0	0	0	0	2
k141_22012_1	0	4	0	8	0	0	0	0
k141_22064_2	0	4	0	28	0	0	0	0
k141_22297_12	19990	4	0	0	0	2	0	0
k141_22328_2	0	4	0	2	0	0	0	0
k141_23090_1	0	4	0	2	0	0	0	0
k141_23095_1	0	4	0	10	0	0	0	0
k141_23199_1	0	4	0	0	0	0	2	0
k141_23319_2	0	4	0	10	0	0	0	0
k141_23399_1	0	4	0	8	0	0	0	0
k141_23476_1	0	4	0	6	0	0	0	0
k141_23590_1	0	4	0	12	0	0	0	0
k141_2389_1	0	4	0	22	0	0	0	0
k141_23974_1	0	4	0	0	4	0	0	0
k141_23988_1	0	4	0	8	0	0	0	0
k141_24075_1	0	4	0	36	0	0	0	0
k141_24205_10	7576	4	0	0	0	2	0	0
k141_24205_19	27434	4	2	0	0	0	0	0
k141_24349_2	0	4	0	4	0	0	0	0
k141_24389_4	0	4	0	12	0	0	0	0
k141_24458_2	0	4	0	18	0	0	0	0
k141_24495_1	0	4	0	40	0	0	0	0
k141_24906_1	0	4	0	16	0	0	0	0
k141_2496_1	0	4	0	28	0	0	0	0
k141_2496_2	0	4	0	2	0	0	0	0
k141_25274_1	0	4	0	14	0	0	0	0
k141_25401_1	0	4	0	24	0	0	0	0
k141_25600_1	0	4	0	30	0	0	0	0
k141_2612_1	0	4	0	42	0	0	0	0
k141_26245_1	0	4	0	22	0	0	0	0
k141_26279_9	19156	4	4	0	0	0	0	0
k141_26314_1	0	4	0	6	0	0	0	0
k141_26352_1	0	4	0	50	0	0	0	0
k141_26513_1	0	4	0	0	2	0	0	0
k141_26532_2	0	4	0	8	0	0	0	0
k141_26613_1	0	4	0	4	0	0	0	0
k141_27204_1	0	4	0	32	0	0	0	0
k141_27261_1	0	4	0	0	2	0	0	0
k141_27466_1	0	4	0	26	0	0	0	0
k141_27601_1	0	4	0	30	0	0	0	0
k141_28241_1	0	4	0	4	0	0	0	0
k141_28280_1	0	4	0	4	0	0	0	0
k141_2844_1	0	4	0	12	0	0	0	0
k141_28450_1	0	4	0	6	0	0	0	0
k141_28507_1	0	4	0	16	0	0	0	0
k141_28920_5	4452	4	0	0	0	0	2	0
k141_28953_2	0	4	0	12	0	0	0	0
k141_28975_1	0	4	0	20	0	0	0	0
k141_29046_1	0	4	0	26	0	0	0	0
k141_29118_1	0	4	0	16	0	0	0	0
k141_29293_1	0	4	0	104	0	0	0	0
k141_29295_20	11972	4	0	0	2	0	0	0
k141_29295_51	18068	4	2	0	0	0	0	0
k141_29295_52	11264	4	0	0	2	0	0	0
k141_29295_55	8760	4	0	0	0	4	0	0
k141_29352_1	0	4	0	2	0	0	0	0
k141_29868_1	0	4	0	14	0	0	0	0
k141_29957_2	0	4	0	10	0	0	0	0
k141_29994_1	0	4	0	32	0	0	0	0
k141_30112_1	0	4	0	10	0	0	0	0
k141_30197_1	0	4	0	8	0	0	0	0
k141_30227_1	0	4	0	36	0	0	0	0
k141_30322_2	0	4	0	14	0	0	0	0
k141_30780_2	0	4	0	4	0	0	0	0
k141_30796_1	0	4	0	8	0	0	0	0
k141_30875_1	0	4	0	44	0	0	0	0
k141_31050_1	0	4	0	0	2	0	0	0
k141_31063_1	0	4	0	24	0	0	0	0
k141_31184_1	0	4	0	16	0	0	0	0
k141_31439_1	0	4	0	2	0	0	0	0
k141_31624_1	0	4	0	12	0	0	0	0
k141_31625_1	0	4	0	22	0	0	0	0
k141_31650_2	0	4	0	6	0	0	0	0
k141_31801_1	0	4	0	6	0	0	0	0
k141_3189_2	0	4	0	14	0	0	0	0
k141_32271_1	0	4	0	8	0	0	0	0
k141_32464_2	0	4	0	30	0	0	0	0
k141_32488_1	0	4	0	20	0	0	0	0
k141_32652_1	0	4	0	10	0	0	0	0
k141_32767_1	0	4	0	2	0	0	0	0
k141_33364_1	0	4	0	10	0	0	0	0
k141_33387_1	0	4	0	22	0	0	0	0
k141_33478_1	0	4	0	50	0	0	0	0
k141_33612_2	0	4	0	8	0	0	0	0
k141_34242_1	0	4	0	2	0	0	0	0
k141_34291_1	0	4	0	14	0	0	0	0
k141_3462_1	0	4	0	0	0	2	0	0
k141_34866_4	0	4	0	12	0	0	0	0
k141_34931_1	0	4	0	10	0	0	0	0
k141_34977_1	0	4	0	2	0	0	0	0
k141_35250_15	3454	4	0	0	2	0	0	0
k141_35250_44	7826	4	0	0	0	0	2	0
k141_35250_57	764	4	0	2	0	0	0	0
k141_35274_15	10958	4	0	0	2	0	0	0
k141_35494_2	0	4	0	28	0	0	0	0
k141_35568_1	0	4	0	30	0	0	0	0
k141_36477_1	0	4	0	0	6	0	0	0
k141_36507_1	0	4	0	30	0	0	0	0
k141_36565_2	0	4	0	2	0	0	0	0
k141_37102_1	0	4	0	54	0	0	0	0
k141_3724_2	2	4	0	22	0	0	0	0
k141_37687_1	0	4	0	16	0	0	0	0
k141_37781_1	0	4	0	2	0	0	0	0
k141_3780_1	0	4	0	4	0	0	0	0
k141_37877_2	0	4	0	14	0	0	0	0
k141_37995_2	0	4	0	30	0	0	0	0
k141_38079_1	0	4	0	0	4	0	0	0
k141_38443_2	0	4	0	20	0	0	0	0
k141_38575_1	0	4	0	20	0	0	0	0
k141_38844_1	0	4	0	20	0	0	0	0
k141_39114_1	0	4	0	20	0	0	0	0
k141_39454_1	0	4	0	10	0	0	0	0
k141_39487_1	0	4	0	16	0	0	0	0
k141_395_1	0	4	0	32	0	0	0	0
k141_39595_1	0	4	0	22	0	0	0	0
k141_39628_1	0	4	0	8	0	0	0	0
k141_39741_1	0	4	0	2	0	0	0	0
k141_40069_1	0	4	0	2	0	0	0	0
k141_40393_21	18666	4	0	0	2	0	0	0
k141_40732_1	0	4	0	20	0	0	0	0
k141_41191_2	0	4	0	8	0	0	0	0
k141_41202_1	0	4	0	10	0	0	0	0
k141_41205_1	0	4	0	18	0	0	0	0
k141_41450_2	0	4	0	48	0	0	0	0
k141_41492_33	13490	4	0	0	0	2	0	0
k141_41492_38	19702	4	6	0	0	0	0	0
k141_41515_1	0	4	0	10	0	0	0	0
k141_41852_1	0	4	0	2	0	0	0	0
k141_42236_1	0	4	0	6	0	0	0	0
k141_42285_1	0	4	0	20	0	0	0	0
k141_42403_2	0	4	0	28	0	0	0	0
k141_42422_1	0	4	0	32	0	0	0	0
k141_42599_1	0	4	0	0	2	0	0	0
k141_42867_1	0	4	0	12	0	0	0	0
k141_4296_3	0	4	0	32	0	0	0	0
k141_43356_1	0	4	0	26	0	0	0	0
k141_43374_1	0	4	2	0	0	0	0	0
k141_43436_1	0	4	0	8	0	0	0	0
k141_43513_1	0	4	0	0	2	0	0	0
k141_43696_15	10220	4	0	4	0	0	0	0
k141_43696_20	6986	4	0	0	0	0	4	0
k141_43704_1	0	4	0	14	0	0	0	0
k141_44007_2	0	4	0	44	0	0	0	0
k141_44052_16	18882	4	0	0	0	0	4	0
k141_4417_2	0	4	0	12	0	0	0	0
k141_4425_2	0	4	0	18	0	0	0	0
k141_44443_1	0	4	0	8	0	0	0	0
k141_44877_1	0	4	0	18	0	0	0	0
k141_45026_1	0	4	0	30	0	0	0	0
k141_45052_1	0	4	0	4	0	0	0	0
k141_45399_1	0	4	0	46	0	0	0	0
k141_45455_1	0	4	0	2	0	0	0	0
k141_45648_1	0	4	0	0	4	0	0	0
k141_45787_1	0	4	0	0	8	0	0	0
k141_45880_1	0	4	0	42	0	0	0	0
k141_45978_1	0	4	0	4	0	0	0	0
k141_46092_1	0	4	0	12	0	0	0	0
k141_46531_1	0	4	0	18	0	0	0	0
k141_46603_2	0	4	0	14	0	0	0	0
k141_46604_1	0	4	0	4	0	0	0	0
k141_46623_141	12412	4	0	0	4	0	0	0
k141_46623_144	12284	4	0	0	0	2	0	0
k141_46623_177	6596	4	0	4	0	0	0	0
k141_46623_35	8654	4	0	0	0	0	2	0
k141_46623_43	7996	4	0	0	0	0	2	0
k141_46623_56	7706	4	0	0	0	2	0	0
k141_46623_76	7466	4	0	0	0	0	2	0
k141_46625_1	0	4	0	56	0	0	0	0
k141_46904_1	0	4	0	20	0	0	0	0
k141_4701_2	18076	4	0	0	0	0	4	0
k141_47135_2	0	4	0	20	0	0	0	0
k141_47149_1	0	4	0	10	0	0	0	0
k141_47252_1	0	4	0	22	0	0	0	0
k141_47305_2	0	4	0	24	0	0	0	0
k141_47422_2	9442	4	2	0	0	0	0	0
k141_47476_1	0	4	0	0	4	0	0	0
k141_47575_2	0	4	0	2	0	0	0	0
k141_47832_1	0	4	0	26	0	0	0	0
k141_48331_2	0	4	0	4	0	0	0	0
k141_49005_1	0	4	0	16	0	0	0	0
k141_49005_2	0	4	0	20	0	0	0	0
k141_49492_1	0	4	0	28	0	0	0	0
k141_49652_1	0	4	0	18	0	0	0	0
k141_49990_4	0	4	0	12	0	0	0	0
k141_50344_1	0	4	0	30	0	0	0	0
k141_50355_1	0	4	0	12	0	0	0	0
k141_50494_2	0	4	0	10	0	0	0	0
k141_50808_2	0	4	0	8	0	0	0	0
k141_50920_14	10288	4	0	0	0	0	2	0
k141_50920_32	26606	4	0	0	0	0	2	0
k141_50984_1	0	4	0	12	0	0	0	0
k141_51065_1	0	4	0	20	0	0	0	0
k141_51511_2	0	4	0	20	0	0	0	0
k141_52000_1	0	4	0	50	0	0	0	0
k141_52005_1	0	4	0	36	0	0	0	0
k141_52112_1	0	4	0	14	0	0	0	0
k141_52118_1	0	4	0	2	0	0	0	0
k141_52140_1	0	4	0	44	0	0	0	0
k141_52180_2	0	4	0	16	0	0	0	0
k141_52244_1	0	4	0	24	0	0	0	0
k141_52328_1	0	4	0	34	0	0	0	0
k141_52504_2	0	4	0	26	0	0	0	0
k141_52886_1	0	4	0	22	0	0	0	0
k141_53204_1	0	4	0	10	0	0	0	0
k141_53222_1	0	4	0	2	0	0	0	0
k141_53504_1	0	4	0	12	0	0	0	0
k141_5353_2	0	4	0	8	0	0	0	0
k141_53616_1	0	4	0	20	0	0	0	0
k141_53743_1	0	4	0	14	0	0	0	0
k141_53902_1	0	4	0	26	0	0	0	0
k141_54007_1	0	4	0	26	0	0	0	0
k141_54198_2	0	4	0	4	0	0	0	0
k141_54645_1	0	4	0	6	0	0	0	0
k141_54697_1	0	4	0	36	0	0	0	0
k141_5477_1	0	4	0	0	2	0	0	0
k141_54875_2	0	4	0	34	0	0	0	0
k141_55049_43	7196	4	0	0	0	2	0	0
k141_55233_1	0	4	0	34	0	0	0	0
k141_5529_1	0	4	0	6	0	0	0	0
k141_55599_1	0	4	0	14	0	0	0	0
k141_55793_1	0	4	0	22	0	0	0	0
k141_55989_1	0	4	0	0	2	0	0	0
k141_56118_1	0	4	0	6	0	0	0	0
k141_5620_1	0	4	0	20	0	0	0	0
k141_56244_1	0	4	0	0	2	0	0	0
k141_56438_1	0	4	0	2	0	0	0	0
k141_56726_2	0	4	0	22	0	0	0	0
k141_56787_1	0	4	0	8	0	0	0	0
k141_56989_1	0	4	0	20	0	0	0	0
k141_57273_1	0	4	0	52	0	0	0	0
k141_57846_1	0	4	0	48	0	0	0	0
k141_58251_1	0	4	0	42	0	0	0	0
k141_5845_1	0	4	0	42	0	0	0	0
k141_58519_1	0	4	0	2	0	0	0	0
k141_58539_3	0	4	0	18	0	0	0	0
k141_58546_1	0	4	0	46	0	0	0	0
k141_5872_1	0	4	0	2	0	0	0	0
k141_5874_2	0	4	0	22	0	0	0	0
k141_59305_1	0	4	0	8	0	0	0	0
k141_5951_2	0	4	0	2	0	0	0	0
k141_59513_1	6766	4	0	2	0	0	0	0
k141_59601_2	0	4	0	4	0	0	0	0
k141_59736_1	0	4	0	26	0	0	0	0
k141_59751_1	0	4	0	10	0	0	0	0
k141_59983_1	0	4	0	30	0	0	0	0
k141_60231_1	0	4	0	8	0	0	0	0
k141_60327_1	0	4	0	6	0	0	0	0
k141_60594_1	0	4	0	0	8	0	0	0
k141_60629_2	0	4	0	22	0	0	0	0
k141_60947_3	0	4	0	18	0	0	0	0
k141_6108_1	0	4	0	4	0	0	0	0
k141_61457_2	0	4	0	4	0	0	0	0
k141_61666_2	0	4	0	10	0	0	0	0
k141_6168_2	0	4	0	6	0	0	0	0
k141_61686_1	0	4	0	26	0	0	0	0
k141_6171_1	0	4	0	16	0	0	0	0
k141_61963_3	0	4	0	22	0	0	0	0
k141_61970_1	0	4	0	32	0	0	0	0
k141_62142_2	0	4	0	6	0	0	0	0
k141_62298_12	18970	4	0	2	0	0	0	0
k141_62298_129	15062	4	0	0	2	0	0	0
k141_62298_162	16240	4	0	0	0	0	4	0
k141_62298_168	16570	4	0	0	0	0	2	0
k141_62298_7	14034	4	2	0	0	0	0	0
k141_62298_74	16318	4	2	0	0	0	0	0
k141_62613_1	0	4	0	24	0	0	0	0
k141_63149_1	0	4	0	22	0	0	0	0
k141_63365_1	0	4	0	32	0	0	0	0
k141_63612_1	0	4	0	6	0	0	0	0
k141_63739_2	0	4	0	20	0	0	0	0
k141_63792_2	0	4	0	20	0	0	0	0
k141_63897_1	0	4	0	38	0	0	0	0
k141_63910_1	0	4	0	12	0	0	0	0
k141_6401_2	0	4	0	8	0	0	0	0
k141_64051_1	0	4	0	14	0	0	0	0
k141_64414_1	0	4	0	6	0	0	0	0
k141_64494_1	0	4	0	20	0	0	0	0
k141_64710_1	0	4	0	4	0	0	0	0
k141_64866_1	0	4	0	32	0	0	0	0
k141_65021_1	0	4	0	2	0	0	0	0
k141_65021_2	0	4	0	14	0	0	0	0
k141_65214_50	3802	4	0	2	0	0	0	0
k141_65214_58	15548	4	0	0	2	0	0	0
k141_65214_92	21370	4	0	0	4	0	0	0
k141_65352_3	0	4	0	8	0	0	0	0
k141_66051_1	0	4	0	14	0	0	0	0
k141_66294_70	22684	4	0	0	0	0	2	0
k141_66527_1	0	4	0	38	0	0	0	0
k141_66965_3	10620	4	0	0	2	0	0	0
k141_67129_53	11260	4	0	0	2	0	0	0
k141_67183_2	0	4	0	2	0	0	0	0
k141_67420_2	0	4	0	4	0	0	0	0
k141_67474_1	0	4	0	48	0	0	0	0
k141_67683_2	0	4	0	14	0	0	0	0
k141_67928_1	0	4	0	30	0	0	0	0
k141_68171_1	0	4	0	2	0	0	0	0
k141_68242_2	0	4	0	12	0	0	0	0
k141_68244_2	0	4	0	20	0	0	0	0
k141_68348_4	0	4	0	24	0	0	0	0
k141_68521_2	0	4	0	12	0	0	0	0
k141_68759_4	0	4	0	6	0	0	0	0
k141_68780_1	0	4	0	0	4	0	0	0
k141_68900_1	0	4	0	16	0	0	0	0
k141_69101_1	0	4	0	34	0	0	0	0
k141_69553_2	0	4	0	0	2	0	0	0
k141_69915_2	0	4	0	12	0	0	0	0
k141_69997_1	0	4	0	2	0	0	0	0
k141_7002_2	0	4	0	4	0	0	0	0
k141_70042_1	0	4	0	0	4	0	0	0
k141_70217_1	0	4	0	50	0	0	0	0
k141_7029_1	0	4	0	6	0	0	0	0
k141_70324_1	0	4	0	8	0	0	0	0
k141_70621_1	0	4	0	10	0	0	0	0
k141_70688_1	0	4	0	18	0	0	0	0
k141_70842_2	0	4	0	12	0	0	0	0
k141_70889_1	0	4	0	10	0	0	0	0
k141_7121_1	0	4	0	28	0	0	0	0
k141_71378_1	0	4	0	22	0	0	0	0
k141_71382_2	0	4	0	2	0	0	0	0
k141_71465_1	0	4	0	30	0	0	0	0
k141_71532_1	0	4	0	36	0	0	0	0
k141_71648_1	0	4	0	46	0	0	0	0
k141_7180_2	0	4	0	4	0	0	0	0
k141_71805_1	0	4	0	26	0	0	0	0
k141_71812_1	0	4	0	24	0	0	0	0
k141_71892_3	0	4	0	0	2	0	0	0
k141_71923_1	0	4	0	4	0	0	0	0
k141_7197_3	0	4	0	4	0	0	0	0
k141_7224_1	0	4	0	18	0	0	0	0
k141_72639_3	0	4	0	32	0	0	0	0
k141_72790_3	0	4	0	8	0	0	0	0
k141_72884_1	0	4	0	18	0	0	0	0
k141_731_1	0	4	0	14	0	0	0	0
k141_73342_2	0	4	0	26	0	0	0	0
k141_73709_1	0	4	0	60	0	0	0	0
k141_7390_17	9450	4	0	2	0	0	0	0
k141_7395_1	0	4	0	18	0	0	0	0
k141_73962_2	0	4	0	0	4	0	0	0
k141_74018_1	0	4	0	24	0	0	0	0
k141_74178_1	0	4	0	22	0	0	0	0
k141_7425_1	0	4	2	0	0	0	0	0
k141_74424_5	12364	4	0	0	2	0	0	0
k141_74472_1	0	4	0	30	0	0	0	0
k141_74514_1	0	4	0	34	0	0	0	0
k141_74888_52	11680	4	0	0	0	0	2	0
k141_74888_57	11234	4	0	2	0	0	0	0
k141_74888_95	19150	4	4	0	0	0	0	0
k141_74895_1	0	4	0	20	0	0	0	0
k141_74966_1	0	4	0	10	0	0	0	0
k141_75066_1	0	4	0	0	2	0	0	0
k141_75127_1	0	4	0	4	0	0	0	0
k141_75257_1	0	4	0	4	0	0	0	0
k141_75384_1	0	4	0	8	0	0	0	0
k141_75497_1	0	4	0	22	0	0	0	0
k141_75557_1	0	4	0	6	0	0	0	0
k141_7566_14	8394	4	0	0	2	0	0	0
k141_76375_2	0	4	0	28	0	0	0	0
k141_76442_1	0	4	0	34	0	0	0	0
k141_76451_1	0	4	0	16	0	0	0	0
k141_76468_1	0	4	0	0	2	0	0	0
k141_76531_2	0	4	0	12	0	0	0	0
k141_76641_1	0	4	0	0	0	2	0	0
k141_76827_1	0	4	0	26	0	0	0	0
k141_76870_1	0	4	0	6	0	0	0	0
k141_77262_1	0	4	0	14	0	0	0	0
k141_77279_2	0	4	0	2	0	0	0	0
k141_77300_1	0	4	0	8	0	0	0	0
k141_77419_2	0	4	0	20	0	0	0	0
k141_77823_1	0	4	0	10	0	0	0	0
k141_77978_1	0	4	0	10	0	0	0	0
k141_780_1	0	4	0	12	0	0	0	0
k141_78110_1	0	4	0	6	0	0	0	0
k141_78122_1	0	4	0	22	0	0	0	0
k141_78135_1	0	4	0	28	0	0	0	0
k141_78195_1	0	4	0	12	0	0	0	0
k141_78310_1	0	4	0	14	0	0	0	0
k141_78532_2	0	4	0	16	0	0	0	0
k141_78799_1	0	4	0	12	0	0	0	0
k141_78875_1	0	4	0	2	0	0	0	0
k141_78928_1	0	4	0	8	0	0	0	0
k141_78930_1	0	4	0	4	0	0	0	0
k141_79083_1	0	4	0	18	0	0	0	0
k141_79825_1	0	4	0	4	0	0	0	0
k141_80021_1	0	4	0	20	0	0	0	0
k141_80283_1	0	4	0	18	0	0	0	0
k141_80421_1	0	4	0	6	0	0	0	0
k141_80421_2	0	4	0	20	0	0	0	0
k141_80563_6	0	4	0	80	0	0	0	0
k141_80644_1	0	4	0	0	6	0	0	0
k141_80677_2	0	4	0	10	0	0	0	0
k141_80706_2	0	4	0	12	0	0	0	0
k141_80774_1	0	4	0	24	0	0	0	0
k141_80827_1	0	4	0	14	0	0	0	0
k141_80836_1	0	4	0	38	0	0	0	0
k141_81336_1	0	4	0	22	0	0	0	0
k141_81343_2	2	4	0	0	0	0	0	2
k141_81552_104	9958	4	2	0	0	0	0	0
k141_81552_56	7822	4	2	0	0	0	0	0
k141_81552_94	5600	4	2	0	0	0	0	0
k141_81604_2	0	4	0	18	0	0	0	0
k141_81646_1	0	4	0	12	0	0	0	0
k141_81864_1	0	4	0	24	0	0	0	0
k141_82123_2	0	4	0	20	0	0	0	0
k141_82163_1	0	4	0	44	0	0	0	0
k141_8264_12	11326	4	0	0	0	0	2	0
k141_83096_2	0	4	0	10	0	0	0	0
k141_83163_52	11194	4	0	0	0	2	0	0
k141_83163_8	8738	4	0	0	0	0	0	4
k141_83311_2	0	4	0	14	0	0	0	0
k141_83353_1	0	4	0	8	0	0	0	0
k141_83884_1	0	4	0	10	0	0	0	0
k141_83930_1	0	4	0	0	0	0	2	0
k141_84036_1	0	4	0	12	0	0	0	0
k141_84511_1	0	4	0	6	0	0	0	0
k141_84766_1	0	4	0	10	0	0	0	0
k141_8480_104	13748	4	0	0	2	0	0	0
k141_8480_71	21936	4	0	0	4	0	0	0
k141_85178_1	0	4	0	2	0	0	0	0
k141_85259_1	0	4	0	10	0	0	0	0
k141_85259_2	0	4	0	16	0	0	0	0
k141_85319_1	0	4	0	24	0	0	0	0
k141_85624_1	0	4	0	6	0	0	0	0
k141_85704_1	0	4	0	14	0	0	0	0
k141_85726_1	0	4	0	2	0	0	0	0
k141_8585_2	0	4	0	18	0	0	0	0
k141_8587_1	0	4	0	16	0	0	0	0
k141_8602_2	0	4	0	24	0	0	0	0
k141_86023_1	0	4	0	0	2	0	0	0
k141_86288_1	0	4	0	38	0	0	0	0
k141_86444_1	0	4	0	6	0	0	0	0
k141_86493_2	0	4	0	2	0	0	0	0
k141_86673_1	0	4	0	32	0	0	0	0
k141_87194_2	0	4	0	0	2	0	0	0
k141_87262_1	0	4	0	12	0	0	0	0
k141_87415_1	0	4	0	22	0	0	0	0
k141_8742_2	0	4	0	50	0	0	0	0
k141_87475_1	0	4	0	24	0	0	0	0
k141_87500_1	0	4	0	28	0	0	0	0
k141_87837_3	0	4	0	6	0	0	0	0
k141_87945_244	14578	4	0	0	0	2	0	0
k141_87945_248	18742	4	0	4	0	0	0	0
k141_87945_292	10954	4	0	0	2	0	0	0
k141_87945_52	5578	4	0	0	0	6	0	0
k141_87945_78	8680	4	0	0	0	2	0	0
k141_88586_2	0	4	0	10	0	0	0	0
k141_889_1	0	4	0	26	0	0	0	0
k141_89135_1	0	4	0	0	6	0	0	0
k141_89158_2	0	4	0	4	0	0	0	0
k141_89405_2	0	4	0	16	0	0	0	0
k141_89575_1	0	4	0	42	0	0	0	0
k141_90046_1	0	4	0	0	2	0	0	0
k141_90210_2	0	4	0	12	0	0	0	0
k141_90237_1	0	4	0	30	0	0	0	0
k141_90378_1	0	4	0	48	0	0	0	0
k141_90518_3	0	4	0	24	0	0	0	0
k141_90588_3	0	4	0	24	0	0	0	0
k141_90766_2	0	4	0	4	0	0	0	0
k141_90840_36	7096	4	2	0	0	0	0	0
k141_90840_75	3094	4	0	0	0	0	0	2
k141_90876_1	0	4	0	40	0	0	0	0
k141_90903_2	0	4	0	2	0	0	0	0
k141_90978_3	0	4	0	20	0	0	0	0
k141_91277_1	0	4	0	2	0	0	0	0
k141_91442_1	0	4	0	28	0	0	0	0
k141_91635_2	0	4	0	2	0	0	0	0
k141_92313_1	0	4	0	54	0	0	0	0
k141_92444_1	0	4	0	14	0	0	0	0
k141_92512_2	0	4	0	28	0	0	0	0
k141_93110_2	0	4	0	18	0	0	0	0
k141_93307_1	0	4	0	20	0	0	0	0
k141_93583_2	0	4	0	4	0	0	0	0
k141_93630_1	0	4	0	34	0	0	0	0
k141_93639_9	0	4	0	32	0	0	0	0
k141_94050_2	0	4	0	6	0	0	0	0
k141_94190_1	0	4	0	10	0	0	0	0
k141_94280_2	0	4	0	10	0	0	0	0
k141_94602_1	0	4	0	10	0	0	0	0
k141_9474_1	0	4	0	14	0	0	0	0
k141_94746_1	0	4	0	16	0	0	0	0
k141_95185_2	0	4	0	38	0	0	0	0
k141_95518_1	0	4	0	8	0	0	0	0
k141_95656_1	0	4	0	24	0	0	0	0
k141_95750_1	0	4	0	18	0	0	0	0
k141_95823_1	0	4	0	8	0	0	0	0
k141_95945_2	0	4	0	36	0	0	0	0
k141_96352_2	0	4	0	26	0	0	0	0
k141_96521_1	0	4	0	24	0	0	0	0
k141_96525_1	0	4	0	42	0	0	0	0
k141_96575_3	0	4	0	2	0	0	0	0
k141_96702_2	0	4	0	10	0	0	0	0
k141_96826_1	0	4	0	20	0	0	0	0
k141_96905_1	0	4	0	2	0	0	0	0
k141_96984_2	0	4	0	6	0	0	0	0
k141_97039_1	0	4	0	16	0	0	0	0
k141_97352_1	0	4	0	20	0	0	0	0
k141_97490_1	0	4	0	12	0	0	0	0
k141_97521_2	0	4	0	2	0	0	0	0
k141_97655_2	0	4	0	16	0	0	0	0
k141_98429_1	0	4	0	10	0	0	0	0
k141_98458_1	0	4	0	10	0	0	0	0
k141_98498_1	0	4	0	12	0	0	0	0
k141_98717_1	0	4	0	12	0	0	0	0
k141_98852_8	5710	4	0	0	0	0	2	0
k141_99007_1	0	4	0	0	2	0	0	0
k141_99036_2	0	4	0	30	0	0	0	0
k141_99064_3	0	4	0	32	0	0	0	0
k141_99070_1	0	4	0	26	0	0	0	0
k141_99097_1	0	4	0	28	0	0	0	0
k141_99192_1	0	4	0	12	0	0	0	0
k141_99358_1	0	4	0	12	0	0	0	0
k141_99397_2	0	4	0	10	0	0	0	0
k141_99607_1	0	4	0	24	0	0	0	0
k141_99971_1	0	4	0	8	0	0	0	0
k141_100418_1	0	6	0	40	0	0	0	0
k141_100542_2	0	6	0	6	0	0	0	0
k141_100834_1	0	6	0	14	0	0	0	0
k141_101108_2	0	6	0	60	0	0	0	0
k141_10175_1	0	6	0	2	0	0	0	0
k141_101888_1	0	6	0	12	0	0	0	0
k141_101991_1	0	6	0	30	0	0	0	0
k141_102321_1	0	6	0	32	0	0	0	0
k141_102581_3	0	6	0	8	0	0	0	0
k141_102619_1	0	6	0	58	0	0	0	0
k141_102652_1	0	6	0	4	0	0	0	0
k141_102706_2	0	6	0	34	0	0	0	0
k141_102844_1	0	6	0	14	0	0	0	0
k141_102978_2	0	6	0	10	0	0	0	0
k141_103032_1	0	6	0	18	0	0	0	0
k141_103093_1	0	6	0	14	0	0	0	0
k141_103347_2	0	6	0	20	0	0	0	0
k141_103355_1	0	6	0	38	0	0	0	0
k141_103541_2	0	6	0	10	0	0	0	0
k141_1038_23	7616	6	0	0	0	0	2	0
k141_104140_1	0	6	0	48	0	0	0	0
k141_10461_1	0	6	0	20	0	0	0	0
k141_104799_1	0	6	0	12	0	0	0	0
k141_105075_1	0	6	0	30	0	0	0	0
k141_105562_2	0	6	0	10	0	0	0	0
k141_105729_1	0	6	0	12	0	0	0	0
k141_105769_1	0	6	0	20	0	0	0	0
k141_106062_2	0	6	0	12	0	0	0	0
k141_106067_1	0	6	0	10	0	0	0	0
k141_10643_1	0	6	0	14	0	0	0	0
k141_106773_1	0	6	0	16	0	0	0	0
k141_106956_3	0	6	0	18	0	0	0	0
k141_107631_1	0	6	0	12	0	0	0	0
k141_107706_1	0	6	0	4	0	0	0	0
k141_107999_2	0	6	0	42	0	0	0	0
k141_1080_1	0	6	0	38	0	0	0	0
k141_108025_1	0	6	0	6	0	0	0	0
k141_108320_1	0	6	0	20	0	0	0	0
k141_108434_1	0	6	0	6	0	0	0	0
k141_11835_1	0	6	0	12	0	0	0	0
k141_12124_1	0	6	0	22	0	0	0	0
k141_1222_1	0	6	0	38	0	0	0	0
k141_1224_2	0	6	0	16	0	0	0	0
k141_12494_2	0	6	0	22	0	0	0	0
k141_12900_1	0	6	0	4	0	0	0	0
k141_13065_1	0	6	0	8	0	0	0	0
k141_13086_1	0	6	0	14	0	0	0	0
k141_13099_1	0	6	0	20	0	0	0	0
k141_13153_1	0	6	0	56	0	0	0	0
k141_13351_5	23650	6	0	2	0	0	0	0
k141_13753_1	0	6	0	38	0	0	0	0
k141_13893_1	0	6	0	18	0	0	0	0
k141_1421_1	0	6	0	12	0	0	0	0
k141_14468_1	0	6	0	32	0	0	0	0
k141_14513_1	0	6	0	48	0	0	0	0
k141_14656_2	0	6	0	4	0	0	0	0
k141_1499_1	0	6	0	20	0	0	0	0
k141_14997_9	0	6	0	2	0	0	0	0
k141_15349_1	0	6	0	52	0	0	0	0
k141_15466_2	0	6	0	4	0	0	0	0
k141_15542_15	23086	6	0	0	0	0	2	0
k141_15542_21	8672	6	0	0	0	0	0	2
k141_15542_43	7140	6	0	2	0	0	0	0
k141_15593_2	0	6	0	72	0	0	0	0
k141_15690_108	7438	6	0	0	0	2	0	0
k141_15690_117	3156	6	0	0	0	2	0	0
k141_15690_127	7736	6	0	0	2	0	0	0
k141_15690_185	4402	6	2	0	0	0	0	0
k141_16399_2	0	6	0	40	0	0	0	0
k141_16973_1	0	6	0	0	0	0	2	0
k141_17284_1	0	6	0	24	0	0	0	0
k141_17316_2	0	6	0	32	0	0	0	0
k141_17431_1	0	6	0	2	0	0	0	0
k141_17623_117	8170	6	0	0	4	0	0	0
k141_17623_324	15106	6	2	0	0	0	0	0
k141_17623_359	26254	6	0	0	2	0	0	0
k141_17623_403	16910	6	0	0	2	0	0	0
k141_17623_72	10482	6	0	0	0	0	4	0
k141_17883_1	0	6	0	18	0	0	0	0
k141_18069_1	0	6	0	38	0	0	0	0
k141_1809_2	0	6	0	10	0	0	0	0
k141_18607_1	0	6	0	26	0	0	0	0
k141_18692_1	0	6	0	22	0	0	0	0
k141_19067_2	0	6	0	12	0	0	0	0
k141_19178_2	0	6	0	24	0	0	0	0
k141_1942_1	0	6	0	2	0	0	0	0
k141_19922_1	0	6	0	2	0	0	0	0
k141_20132_3	11958	6	0	0	0	2	0	0
k141_20254_1	0	6	0	10	0	0	0	0
k141_20466_1	0	6	0	2	0	0	0	0
k141_2060_1	0	6	0	54	0	0	0	0
k141_20648_2	0	6	0	18	0	0	0	0
k141_2065_2	0	6	0	16	0	0	0	0
k141_20803_1	0	6	0	62	0	0	0	0
k141_21130_1	0	6	0	6	0	0	0	0
k141_21271_1	0	6	0	36	0	0	0	0
k141_21404_1	0	6	0	6	0	0	0	0
k141_2170_1	0	6	0	24	0	0	0	0
k141_22318_1	0	6	0	18	0	0	0	0
k141_22809_1	0	6	0	28	0	0	0	0
k141_23145_2	0	6	0	0	4	0	0	0
k141_23476_3	0	6	0	6	0	0	0	0
k141_23658_1	0	6	0	18	0	0	0	0
k141_2411_1	0	6	0	48	0	0	0	0
k141_24205_15	22438	6	4	0	0	0	0	0
k141_24312_1	0	6	0	0	2	0	0	0
k141_24557_1	0	6	0	38	0	0	0	0
k141_24703_1	0	6	0	6	0	0	0	0
k141_24740_2	0	6	0	4	0	0	0	0
k141_24777_1	0	6	0	0	8	0	0	0
k141_24868_1	0	6	0	40	0	0	0	0
k141_26169_2	0	6	0	2	0	0	0	0
k141_27263_2	0	6	0	16	0	0	0	0
k141_27300_2	0	6	0	50	0	0	0	0
k141_27626_1	0	6	0	10	0	0	0	0
k141_27665_1	0	6	0	20	0	0	0	0
k141_27939_1	0	6	0	10	0	0	0	0
k141_28162_1	0	6	0	10	0	0	0	0
k141_29051_1	0	6	0	6	0	0	0	0
k141_29295_84	22646	6	2	0	0	0	0	0
k141_29651_2	0	6	0	32	0	0	0	0
k141_30020_1	0	6	0	38	0	0	0	0
k141_3004_2	0	6	0	4	0	0	0	0
k141_3067_2	0	6	0	4	0	0	0	0
k141_30703_1	0	6	0	22	0	0	0	0
k141_31488_2	0	6	0	22	0	0	0	0
k141_31659_1	0	6	0	10	0	0	0	0
k141_31888_1	0	6	0	12	0	0	0	0
k141_31983_2	0	6	0	52	0	0	0	0
k141_32223_2	0	6	0	44	0	0	0	0
k141_32431_1	0	6	0	4	0	0	0	0
k141_32517_1	0	6	0	30	0	0	0	0
k141_32652_2	0	6	0	36	0	0	0	0
k141_33408_1	0	6	0	12	0	0	0	0
k141_33515_1	0	6	0	18	0	0	0	0
k141_33773_1	0	6	0	2	0	0	0	0
k141_3416_2	0	6	0	26	0	0	0	0
k141_34723_1	0	6	0	8	0	0	0	0
k141_34729_2	0	6	0	34	0	0	0	0
k141_35250_71	5028	6	0	0	2	0	0	0
k141_35436_1	0	6	0	12	0	0	0	0
k141_35565_1	0	6	0	2	0	0	0	0
k141_36582_1	0	6	0	8	0	0	0	0
k141_36816_1	0	6	0	12	0	0	0	0
k141_37096_1	0	6	0	16	0	0	0	0
k141_37097_2	0	6	0	14	0	0	0	0
k141_37465_1	0	6	0	46	0	0	0	0
k141_37527_2	0	6	0	52	0	0	0	0
k141_37581_2	0	6	0	20	0	0	0	0
k141_37826_1	0	6	0	24	0	0	0	0
k141_37905_2	2	6	0	16	0	0	0	0
k141_37974_1	0	6	0	2	0	0	0	0
k141_38933_2	0	6	0	28	0	0	0	0
k141_39117_1	0	6	0	6	0	0	0	0
k141_39421_1	0	6	0	12	0	0	0	0
k141_39906_1	0	6	0	12	0	0	0	0
k141_40022_1	0	6	0	6	0	0	0	0
k141_40393_70	10292	6	0	2	0	0	0	0
k141_40735_2	0	6	0	60	0	0	0	0
k141_40855_3	0	6	0	14	0	0	0	0
k141_4111_1	0	6	0	42	0	0	0	0
k141_4129_1	0	6	0	4	0	0	0	0
k141_41492_18	12762	6	2	0	0	0	0	0
k141_41607_1	0	6	0	18	0	0	0	0
k141_41918_1	0	6	0	32	0	0	0	0
k141_4198_2	0	6	0	6	0	0	0	0
k141_42469_1	0	6	0	4	0	0	0	0
k141_42614_1	0	6	0	38	0	0	0	0
k141_42668_2	0	6	0	6	0	0	0	0
k141_4297_3	0	6	0	2	0	0	0	0
k141_43315_1	0	6	0	4	0	0	0	0
k141_43452_1	0	6	0	2	0	0	0	0
k141_43481_1	0	6	0	26	0	0	0	0
k141_44052_24	14154	6	0	0	2	0	0	0
k141_4414_1	0	6	0	8	0	0	0	0
k141_44797_1	0	6	0	0	4	0	0	0
k141_44943_1	0	6	0	16	0	0	0	0
k141_45469_1	0	6	0	16	0	0	0	0
k141_45963_1	0	6	0	8	0	0	0	0
k141_46133_1	0	6	0	30	0	0	0	0
k141_46623_114	7902	6	0	0	0	0	2	0
k141_4701_17	14628	6	0	0	4	0	0	0
k141_4701_20	19252	6	0	0	2	0	0	0
k141_4701_43	37384	6	0	0	0	0	4	0
k141_47209_1	0	6	0	12	0	0	0	0
k141_47214_1	0	6	0	48	0	0	0	0
k141_47305_1	0	6	0	10	0	0	0	0
k141_47601_1	0	6	0	2	0	0	0	0
k141_47884_3	0	6	0	14	0	0	0	0
k141_48388_1	0	6	0	2	0	0	0	0
k141_48940_1	0	6	0	14	0	0	0	0
k141_49574_1	0	6	0	12	0	0	0	0
k141_49827_2	0	6	0	50	0	0	0	0
k141_50055_1	0	6	0	20	0	0	0	0
k141_50606_1	0	6	0	12	0	0	0	0
k141_50645_1	0	6	0	28	0	0	0	0
k141_50904_1	0	6	0	26	0	0	0	0
k141_5095_1	0	6	0	44	0	0	0	0
k141_51888_1	0	6	0	18	0	0	0	0
k141_51938_1	0	6	0	12	0	0	0	0
k141_52038_1	0	6	0	14	0	0	0	0
k141_52553_1	0	6	0	2	0	0	0	0
k141_53452_1	0	6	0	14	0	0	0	0
k141_53884_1	0	6	0	28	0	0	0	0
k141_54235_1	0	6	0	0	2	0	0	0
k141_54602_1	0	6	0	18	0	0	0	0
k141_54844_2	0	6	0	26	0	0	0	0
k141_54946_1	0	6	0	14	0	0	0	0
k141_55068_2	0	6	0	12	0	0	0	0
k141_561_2	0	6	0	46	0	0	0	0
k141_56234_3	0	6	0	14	0	0	0	0
k141_56459_1	0	6	0	18	0	0	0	0
k141_56871_1	0	6	0	12	0	0	0	0
k141_56963_1	0	6	0	8	0	0	0	0
k141_5710_2	0	6	0	16	0	0	0	0
k141_57231_1	0	6	0	16	0	0	0	0
k141_57305_1	0	6	0	22	0	0	0	0
k141_57745_2	0	6	0	68	0	0	0	0
k141_57790_3	0	6	0	8	0	0	0	0
k141_57921_2	0	6	0	8	0	0	0	0
k141_58770_1	0	6	0	26	0	0	0	0
k141_59382_1	0	6	0	14	0	0	0	0
k141_59927_1	0	6	0	32	0	0	0	0
k141_60360_1	0	6	0	10	0	0	0	0
k141_6051_1	0	6	0	34	0	0	0	0
k141_61803_1	0	6	0	6	0	0	0	0
k141_62130_1	0	6	0	22	0	0	0	0
k141_62293_1	0	6	0	14	0	0	0	0
k141_62298_113	14410	6	0	0	0	0	0	2
k141_62298_189	14730	6	0	0	2	0	0	0
k141_62298_28	7338	6	0	0	2	0	0	0
k141_62298_3	15736	6	0	0	2	0	0	0
k141_62448_2	0	6	0	18	0	0	0	0
k141_62726_1	0	6	0	32	0	0	0	0
k141_63666_1	0	6	0	4	0	0	0	0
k141_64256_1	0	6	0	14	0	0	0	0
k141_6428_1	0	6	0	12	0	0	0	0
k141_64283_1	0	6	0	10	0	0	0	0
k141_64986_2	0	6	0	4	0	0	0	0
k141_65208_1	0	6	0	12	0	0	0	0
k141_65214_51	16236	6	0	2	0	0	0	0
k141_65214_52	758	6	0	2	0	0	0	0
k141_65214_75	8994	6	0	0	0	2	0	0
k141_6530_1	0	6	0	12	0	0	0	0
k141_65352_2	0	6	0	36	0	0	0	0
k141_65632_2	0	6	0	6	0	0	0	0
k141_6570_1	0	6	0	0	0	2	0	0
k141_6573_1	0	6	0	12	0	0	0	0
k141_66257_1	0	6	0	10	0	0	0	0
k141_66294_24	10338	6	0	2	0	0	0	0
k141_66294_61	11380	6	0	0	2	0	0	0
k141_66354_2	0	6	0	22	0	0	0	0
k141_66602_1	0	6	0	26	0	0	0	0
k141_66814_1	0	6	0	4	0	0	0	0
k141_6682_1	0	6	0	18	0	0	0	0
k141_66965_28	7100	6	0	10	0	0	0	0
k141_67315_1	0	6	0	26	0	0	0	0
k141_67960_1	0	6	0	20	0	0	0	0
k141_68293_1	0	6	0	8	0	0	0	0
k141_68296_2	0	6	0	4	0	0	0	0
k141_6840_1	0	6	0	6	0	0	0	0
k141_68649_2	0	6	0	6	0	0	0	0
k141_68773_1	0	6	0	14	0	0	0	0
k141_68880_1	0	6	0	38	0	0	0	0
k141_69982_1	0	6	0	4	0	0	0	0
k141_69986_2	0	6	0	22	0	0	0	0
k141_70462_1	0	6	0	30	0	0	0	0
k141_70782_1	0	6	0	2	0	0	0	0
k141_7148_3	0	6	0	22	0	0	0	0
k141_717_1	0	6	0	10	0	0	0	0
k141_71944_3	0	6	0	26	0	0	0	0
k141_72045_1	0	6	0	6	0	0	0	0
k141_72329_1	0	6	0	4	0	0	0	0
k141_72340_1	0	6	0	16	0	0	0	0
k141_72479_27	12614	6	0	0	0	0	4	0
k141_72488_1	0	6	0	48	0	0	0	0
k141_72800_1	0	6	0	38	0	0	0	0
k141_73316_1	0	6	0	12	0	0	0	0
k141_73781_1	0	6	0	2	0	0	0	0
k141_73914_1	0	6	0	16	0	0	0	0
k141_73951_1	0	6	0	18	0	0	0	0
k141_73966_3	0	6	0	34	0	0	0	0
k141_7400_2	0	6	0	8	0	0	0	0
k141_74189_2	0	6	0	28	0	0	0	0
k141_7422_1	0	6	0	6	0	0	0	0
k141_74527_1	0	6	0	16	0	0	0	0
k141_74888_32	16642	6	2	0	0	0	0	0
k141_74888_58	11198	6	0	2	0	0	0	0
k141_74888_69	1978	6	0	0	0	2	0	0
k141_75144_1	0	6	0	10	0	0	0	0
k141_75755_1	0	6	0	30	0	0	0	0
k141_75997_1	0	6	0	32	0	0	0	0
k141_76081_1	0	6	0	4	0	0	0	0
k141_76725_2	0	6	0	52	0	0	0	0
k141_76850_1	0	6	0	6	0	0	0	0
k141_76973_1	0	6	0	4	0	0	0	0
k141_7727_3	7824	6	0	0	0	0	4	0
k141_77332_1	0	6	0	14	0	0	0	0
k141_77334_1	0	6	0	46	0	0	0	0
k141_77515_1	0	6	0	6	0	0	0	0
k141_77634_2	0	6	0	4	0	0	0	0
k141_77639_3	0	6	0	10	0	0	0	0
k141_78107_1	0	6	2	0	0	0	0	0
k141_78182_45	13900	6	0	0	2	0	0	0
k141_7820_1	0	6	0	34	0	0	0	0
k141_78295_1	0	6	0	2	0	0	0	0
k141_78641_1	0	6	0	50	0	0	0	0
k141_78669_1	0	6	0	36	0	0	0	0
k141_78803_1	0	6	0	4	0	0	0	0
k141_7934_1	0	6	0	32	0	0	0	0
k141_79406_2	0	6	0	18	0	0	0	0
k141_79949_3	0	6	0	48	0	0	0	0
k141_80094_2	0	6	0	12	0	0	0	0
k141_8082_1	0	6	0	2	0	0	0	0
k141_80873_1	0	6	0	90	0	0	0	0
k141_81466_1	0	6	0	12	0	0	0	0
k141_81552_78	5430	6	0	0	0	0	0	2
k141_81633_1	0	6	0	0	8	0	0	0
k141_82012_1	0	6	0	50	0	0	0	0
k141_82209_1	0	6	0	60	0	0	0	0
k141_82411_1	0	6	0	32	0	0	0	0
k141_8264_1	14994	6	2	0	0	0	0	0
k141_82697_2	0	6	0	6	0	0	0	0
k141_82755_1	0	6	0	10	0	0	0	0
k141_83529_1	0	6	0	20	0	0	0	0
k141_8359_2	0	6	0	14	0	0	0	0
k141_83651_1	0	6	0	16	0	0	0	0
k141_83942_1	0	6	0	22	0	0	0	0
k141_84089_1	0	6	0	10	0	0	0	0
k141_8415_1	0	6	0	22	0	0	0	0
k141_8480_116	23156	6	0	0	0	2	0	0
k141_84849_1	0	6	0	12	0	0	0	0
k141_85065_3	0	6	0	10	0	0	0	0
k141_8529_1	0	6	0	0	8	0	0	0
k141_85347_1	0	6	0	24	0	0	0	0
k141_86379_1	0	6	0	38	0	0	0	0
k141_86674_1	0	6	0	2	0	0	0	0
k141_86911_1	0	6	0	12	0	0	0	0
k141_87036_1	0	6	0	34	0	0	0	0
k141_87159_3	0	6	0	2	0	0	0	0
k141_87418_2	0	6	0	28	0	0	0	0
k141_87651_1	0	6	0	34	0	0	0	0
k141_87945_251	14282	6	0	2	0	0	0	0
k141_87945_269	9414	6	2	0	0	0	0	0
k141_87945_8	20012	6	0	0	0	2	0	0
k141_89203_1	0	6	0	48	0	0	0	0
k141_89347_1	0	6	0	16	0	0	0	0
k141_89682_1	0	6	0	0	6	0	0	0
k141_90718_2	0	6	0	0	12	0	0	0
k141_90742_1	0	6	0	18	0	0	0	0
k141_90879_1	0	6	0	2	0	0	0	0
k141_91268_2	0	6	0	10	0	0	0	0
k141_91325_2	0	6	0	10	0	0	0	0
k141_9178_1	0	6	0	8	0	0	0	0
k141_92448_2	0	6	0	6	0	0	0	0
k141_9251_1	0	6	0	4	0	0	0	0
k141_93391_1	0	6	0	48	0	0	0	0
k141_93634_1	0	6	0	44	0	0	0	0
k141_9366_1	0	6	0	40	0	0	0	0
k141_94075_1	0	6	0	6	0	0	0	0
k141_9409_2	0	6	0	18	0	0	0	0
k141_94192_1	0	6	0	62	0	0	0	0
k141_94871_2	0	6	0	12	0	0	0	0
k141_95325_1	0	6	0	32	0	0	0	0
k141_95340_2	0	6	0	8	0	0	0	0
k141_95438_2	0	6	0	18	0	0	0	0
k141_95581_1	0	6	0	8	0	0	0	0
k141_97383_2	0	6	0	24	0	0	0	0
k141_97651_3	0	6	0	24	0	0	0	0
k141_97890_1	0	6	0	4	0	0	0	0
k141_98287_1	0	6	0	4	0	0	0	0
k141_98368_1	0	6	0	24	0	0	0	0
k141_98490_1	0	6	0	60	0	0	0	0
k141_98852_5	6944	6	0	0	0	0	2	0
k141_98852_58	11194	6	0	0	2	0	0	0
k141_99041_1	0	6	0	8	0	0	0	0
k141_99140_2	0	6	0	36	0	0	0	0
k141_99158_1	0	6	0	34	0	0	0	0
k141_99572_3	0	6	0	38	0	0	0	0
k141_99993_1	0	6	0	40	0	0	0	0
k141_100051_1	0	8	0	14	0	0	0	0
k141_100225_1	0	8	0	26	0	0	0	0
k141_100974_1	0	8	0	0	4	0	0	0
k141_100991_1	0	8	0	28	0	0	0	0
k141_10132_1	0	8	0	2	0	0	0	0
k141_10145_1	0	8	0	20	0	0	0	0
k141_102160_1	0	8	0	16	0	0	0	0
k141_103117_1	0	8	0	12	0	0	0	0
k141_103516_1	0	8	0	12	0	0	0	0
k141_103551_1	0	8	0	10	0	0	0	0
k141_103855_1	0	8	0	6	0	0	0	0
k141_104198_1	0	8	0	36	0	0	0	0
k141_10452_1	0	8	0	82	0	0	0	0
k141_104535_1	0	8	0	22	0	0	0	0
k141_104607_2	2	8	0	8	0	0	0	0
k141_104705_1	0	8	0	18	0	0	0	0
k141_106190_1	0	8	0	4	0	0	0	0
k141_108768_2	0	8	0	12	0	0	0	0
k141_11012_1	0	8	0	24	0	0	0	0
k141_11365_1	0	8	0	28	0	0	0	0
k141_11380_1	0	8	0	14	0	0	0	0
k141_11499_1	0	8	0	48	0	0	0	0
k141_12035_1	0	8	0	32	0	0	0	0
k141_12214_2	0	8	0	14	0	0	0	0
k141_1224_1	0	8	0	22	0	0	0	0
k141_12650_1	0	8	0	28	0	0	0	0
k141_12914_1	0	8	0	12	0	0	0	0
k141_13441_2	0	8	0	28	0	0	0	0
k141_14317_1	0	8	0	38	0	0	0	0
k141_14455_1	0	8	0	12	0	0	0	0
k141_14535_1	0	8	0	24	0	0	0	0
k141_14760_1	0	8	0	18	0	0	0	0
k141_15100_1	0	8	0	8	0	0	0	0
[truncated: 3,206 more rows]

## Sheet: Supplementary Table S3
Supplementary Table S3 The unique genes in cecal content samples in metatranscriptomic dataset
gene id	P	N	C1	C2	C3	C4	C5	C6
mix_1001_3	1413	0	0	0	2	0	0	0
mix_10019_1	0	0	0	0	7	0	0	0
mix_10038_1	0	0	0	0	0	0	3	0
mix_1004_1	0	0	0	0	2	0	0	0
mix_10050_1	0	0	0	17	0	0	0	0
mix_10130_1	0	0	0	0	0	0	4	0
mix_10179_1	0	0	0	0	0	0	0	14
mix_10248_1	1068	0	0	0	0	0	1	0
mix_10261_1	0	0	0	0	0	0	3	0
mix_10265_1	91	0	0	0	0	0	1	0
mix_10281_1	0	0	0	0	9	0	0	0
mix_10294_1	0	0	0	0	15	0	0	0
mix_10303_1	0	0	0	0	1	0	0	0
mix_10327_1	115	0	0	0	4	0	0	0
mix_10356_1	41	0	0	0	1	0	0	0
mix_10379_1	72	0	0	0	0	0	0	1
mix_10402_1	69	0	0	0	10	0	0	0
mix_10413_1	133	0	0	0	1	0	0	0
mix_10424_1	668	0	0	0	1	0	0	0
mix_10434_1	593	0	1	0	0	0	0	0
mix_10454_1	0	0	10	0	0	0	0	0
mix_10490_1	33	0	0	6	0	0	0	0
mix_10491_1	5	0	0	0	0	0	7	0
mix_10504_1	45	0	0	0	0	0	1	0
mix_10510_1	0	0	0	0	0	0	0	14
mix_10514_1	0	0	0	0	0	0	4	0
mix_10548_2	334	0	0	0	1	0	0	0
mix_10570_1	0	0	0	0	13	0	0	0
mix_10592_1	8	0	0	0	9	0	0	0
mix_10624_1	0	0	0	13	0	0	0	0
mix_10634_1	480	0	0	0	1	0	0	0
mix_10648_1	59	0	0	0	7	0	0	0
mix_10691_4	174	0	0	0	0	0	0	3
mix_10699_1	0	0	12	0	0	0	0	0
mix_10721_2	19	0	0	0	3	0	0	0
mix_10726_2	92	0	0	15	0	0	0	0
mix_10748_1	0	0	0	0	0	0	0	17
mix_10767_1	0	0	0	0	0	27	0	0
mix_10792_1	0	0	0	0	3	0	0	0
mix_10801_1	0	0	0	0	0	0	4	0
mix_10831_1	669	0	0	0	0	0	1	0
mix_10839_1	241	0	0	0	0	0	12	0
mix_10844_1	172	0	0	0	0	0	1	0
mix_10860_1	0	0	0	9	0	0	0	0
mix_10874_1	0	0	0	0	11	0	0	0
mix_10880_1	0	0	0	0	0	0	7	0
mix_10885_1	371	0	11	0	0	0	0	0
mix_10899_1	0	0	11	0	0	0	0	0
mix_1091_2	221	0	1	0	0	0	0	0
mix_1091_3	395	0	0	0	0	0	1	0
mix_10920_1	0	0	0	0	0	0	6	0
mix_10926_1	22	0	0	0	7	0	0	0
mix_1093_2	41	0	0	19	0	0	0	0
mix_10954_1	0	0	0	0	11	0	0	0
mix_1097_7	122	0	0	0	0	0	1	0
mix_10986_1	0	0	0	0	1	0	0	0
mix_11007_1	15	0	0	0	0	0	1	0
mix_11023_1	0	0	0	0	0	0	1	0
mix_11031_1	3	0	0	17	0	0	0	0
mix_11038_1	0	0	0	0	15	0	0	0
mix_11047_1	0	0	23	0	0	0	0	0
mix_11048_1	0	0	0	12	0	0	0	0
mix_1109_2	44	0	0	0	0	17	0	0
mix_11126_1	98	0	6	0	0	0	0	0
mix_11129_1	0	0	0	0	4	0	0	0
mix_11130_1	0	0	0	0	14	0	0	0
mix_11139_1	7	0	0	0	1	0	0	0
mix_11182_1	0	0	0	0	9	0	0	0
mix_1125_1	15	0	0	0	0	0	0	1
mix_1129_1	0	0	0	0	7	0	0	0
mix_11291_1	27	0	0	0	0	8	0	0
mix_1134_1	0	0	0	0	19	0	0	0
mix_11378_1	0	0	0	0	0	0	3	0
mix_1138_1	398	0	0	0	1	0	0	0
mix_11462_1	0	0	19	0	0	0	0	0
mix_1152_1	0	0	0	11	0	0	0	0
mix_11533_1	0	0	0	0	0	0	3	0
mix_11551_1	0	0	0	12	0	0	0	0
mix_11576_1	22	0	0	0	0	0	2	0
mix_11601_1	0	0	0	0	5	0	0	0
mix_1167_1	5	0	0	0	0	0	0	20
mix_11676_1	0	0	0	0	5	0	0	0
mix_11689_1	0	0	0	0	0	16	0	0
mix_1172_2	0	0	13	0	0	0	0	0
mix_11736_1	0	0	18	0	0	0	0	0
mix_11758_1	0	0	12	0	0	0	0	0
mix_11804_1	0	0	0	0	0	0	5	0
mix_11837_1	0	0	0	0	0	0	0	16
mix_11865_1	0	0	0	0	0	0	5	0
mix_11882_1	0	0	0	0	0	0	0	32
mix_1189_1	289	0	0	13	0	0	0	0
mix_11899_1	0	0	0	0	0	0	6	0
mix_1191_1	1173	0	0	0	0	34	0	0
mix_11919_1	10	0	0	13	0	0	0	0
mix_12035_1	0	0	5	0	0	0	0	0
mix_12073_1	0	0	0	0	0	0	0	12
mix_12117_1	0	0	0	0	9	0	0	0
mix_12172_1	0	0	0	9	0	0	0	0
mix_12173_1	0	0	0	0	5	0	0	0
mix_12186_1	821	0	0	0	0	0	1	0
mix_12232_1	0	0	0	0	4	0	0	0
mix_12254_1	0	0	0	0	10	0	0	0
mix_12288_1	0	0	0	0	0	0	1	0
mix_12309_1	0	0	0	0	0	12	0	0
mix_12382_1	0	0	0	6	0	0	0	0
mix_12415_1	0	0	9	0	0	0	0	0
mix_12418_1	0	0	0	0	0	7	0	0
mix_12471_1	0	0	0	0	0	0	3	0
mix_12479_1	0	0	0	0	3	0	0	0
mix_12563_1	0	0	0	0	6	0	0	0
mix_12576_1	0	0	0	0	0	0	6	0
mix_12635_1	0	0	0	0	0	0	3	0
mix_12658_1	0	0	0	0	0	0	5	0
mix_12668_1	0	0	0	0	9	0	0	0
mix_12681_1	0	0	0	0	7	0	0	0
mix_1275_1	0	0	0	0	11	0	0	0
mix_12783_1	0	0	0	0	0	16	0	0
mix_1285_2	914	0	1	0	0	0	0	0
mix_1286_1	0	0	0	0	0	0	13	0
mix_12862_1	0	0	0	0	9	0	0	0
mix_12991_1	0	0	0	0	0	0	0	17
mix_13016_1	0	0	0	0	0	0	5	0
mix_1303_2	195	0	0	0	0	21	0	0
mix_1316_1	169	0	0	0	0	14	0	0
mix_13172_1	0	0	0	0	0	0	0	16
mix_13197_1	111	0	1	0	0	0	0	0
mix_13212_1	1318	0	0	0	0	0	1	0
mix_13213_1	1966	0	0	0	1	0	0	0
mix_13213_2	647	0	0	0	0	40	0	0
mix_13213_3	463	0	0	0	7	0	0	0
mix_13215_2	919	0	0	0	11	0	0	0
mix_13235_1	113	0	0	0	0	0	1	0
mix_1325_1	0	0	0	0	3	0	0	0
mix_13272_1	385	0	0	0	0	1	0	0
mix_13285_1	99	0	0	0	0	31	0	0
mix_13285_2	459	0	0	0	0	15	0	0
mix_13288_1	0	0	0	5	0	0	0	0
mix_13290_1	0	0	0	0	0	0	4	0
mix_13313_1	71	0	0	0	1	0	0	0
mix_13325_1	979	0	0	0	0	0	0	1
mix_1333_1	0	0	0	0	0	0	13	0
mix_13334_1	223	0	0	0	0	16	0	0
mix_13335_1	376	0	0	0	0	17	0	0
mix_13364_1	11	0	0	0	3	0	0	0
mix_13397_1	0	0	0	0	0	0	4	0
mix_13425_1	0	0	6	0	0	0	0	0
mix_13436_2	138	0	0	0	0	36	0	0
mix_13442_2	816	0	0	0	9	0	0	0
mix_13459_1	0	0	0	0	7	0	0	0
mix_13464_1	0	0	0	0	0	0	4	0
mix_13484_2	616	0	0	0	13	0	0	0
mix_13485_2	195	0	0	0	0	0	1	0
mix_13491_1	1203	0	0	0	0	0	1	0
mix_13521_1	104	0	0	12	0	0	0	0
mix_13525_1	169	0	0	0	0	0	0	8
mix_13533_1	4	0	0	0	0	23	0	0
mix_13544_1	43	0	0	0	4	0	0	0
mix_13578_1	0	0	0	0	0	0	0	7
mix_13583_2	45	0	0	0	0	0	1	0
mix_13586_1	1022	0	0	0	0	0	2	0
mix_13601_1	0	0	0	0	0	0	0	10
mix_13614_1	33	0	0	0	0	1	0	0
mix_13660_1	29	0	0	0	0	21	0	0
mix_13668_1	441	0	0	0	10	0	0	0
mix_13703_1	1793	0	0	0	0	0	0	1
mix_13762_1	0	0	0	2	0	0	0	0
mix_13782_1	9	0	0	0	0	0	0	1
mix_13815_1	302	0	0	0	0	0	0	1
mix_13841_1	0	0	0	0	0	0	0	19
mix_13871_1	350	0	0	0	1	0	0	0
mix_13931_2	87	0	0	0	1	0	0	0
mix_13931_3	344	0	0	0	0	0	1	0
mix_13935_1	0	0	0	0	0	0	0	22
mix_13945_1	0	0	0	0	0	0	0	8
mix_13953_1	42	0	0	0	1	0	0	0
mix_14007_1	0	0	10	0	0	0	0	0
mix_1407_1	293	0	0	0	0	10	0	0
mix_14081_1	18	0	0	0	0	0	0	1
mix_14096_1	66	0	0	0	0	16	0	0
mix_14108_1	0	0	0	0	9	0	0	0
mix_14110_1	0	0	0	13	0	0	0	0
mix_14125_1	1	0	0	0	0	0	0	10
mix_1414_1	0	0	0	15	0	0	0	0
mix_14178_2	26	0	0	0	1	0	0	0
mix_14185_1	0	0	0	0	7	0	0	0
mix_1421_1	0	0	0	0	8	0	0	0
mix_14236_1	0	0	0	14	0	0	0	0
mix_14262_1	0	0	0	0	0	0	0	15
mix_143_1	325	0	0	0	0	0	1	0
mix_1432_1	1	0	0	0	0	1	0	0
mix_14372_1	0	0	6	0	0	0	0	0
mix_14385_1	0	0	0	11	0	0	0	0
mix_14475_1	33	0	0	10	0	0	0	0
mix_14485_1	37	0	0	0	0	0	1	0
mix_14486_1	0	0	0	0	0	0	3	0
mix_14550_1	0	0	0	0	0	0	7	0
mix_14600_1	0	0	4	0	0	0	0	0
mix_14606_1	0	0	0	0	7	0	0	0
mix_14616_1	0	0	0	0	0	0	7	0
mix_14641_1	0	0	0	0	0	11	0	0
mix_14647_1	0	0	17	0	0	0	0	0
mix_14653_1	0	0	0	0	0	19	0	0
mix_14666_1	0	0	8	0	0	0	0	0
mix_14708_1	0	0	0	0	0	21	0	0
mix_14752_1	0	0	0	0	10	0	0	0
mix_14779_1	0	0	0	0	0	0	3	0
mix_14895_1	0	0	0	8	0	0	0	0
mix_14930_1	0	0	0	14	0	0	0	0
mix_14970_1	0	0	0	0	0	7	0	0
mix_14995_1	0	0	0	12	0	0	0	0
mix_15083_1	0	0	0	0	5	0	0	0
mix_15121_1	0	0	0	0	4	0	0	0
mix_15126_1	0	0	6	0	0	0	0	0
mix_15154_1	0	0	0	0	0	0	4	0
mix_15168_1	0	0	12	0	0	0	0	0
mix_15261_1	0	0	0	0	12	0	0	0
mix_1528_1	48	0	0	0	1	0	0	0
mix_15356_1	0	0	0	0	0	10	0	0
mix_15361_1	0	0	0	0	16	0	0	0
mix_15438_1	0	0	0	0	0	0	2	0
mix_15444_1	0	0	14	0	0	0	0	0
mix_15482_1	0	0	25	0	0	0	0	0
mix_1558_1	0	0	0	0	20	0	0	0
mix_15660_1	0	0	0	0	0	0	6	0
mix_15777_1	0	0	0	0	0	0	3	0
mix_1578_1	0	0	0	0	0	0	0	18
mix_15856_1	0	0	0	0	0	16	0	0
mix_15863_1	0	0	0	18	0	0	0	0
mix_15903_1	0	0	0	0	0	0	0	16
mix_15940_1	0	0	0	23	0	0	0	0
mix_15956_1	0	0	0	0	0	5	0	0
mix_1600_1	0	0	13	0	0	0	0	0
mix_16000_1	2	0	12	0	0	0	0	0
mix_16026_1	0	0	0	0	0	0	0	21
mix_16035_4	443	0	0	0	2	0	0	0
mix_16036_2	190	0	0	0	0	1	0	0
mix_16049_14	0	0	0	0	0	0	1	0
mix_16053_1	121	0	0	0	0	0	2	0
mix_1610_1	0	0	0	44	0	0	0	0
mix_16123_1	1436	0	0	0	0	25	0	0
mix_16126_1	634	0	0	0	1	0	0	0
mix_16136_2	70	0	0	0	0	0	1	0
mix_16139_1	15	0	0	0	0	0	1	0
mix_16144_1	0	0	0	0	0	0	0	7
mix_16152_1	0	0	25	0	0	0	0	0
mix_16158_2	369	0	0	0	1	0	0	0
mix_16163_1	0	0	0	0	0	14	0	0
mix_16168_2	674	0	0	0	0	1	0	0
mix_16225_1	453	0	0	0	0	0	1	0
mix_16321_1	1229	0	0	0	1	0	0	0
mix_16340_1	0	0	20	0	0	0	0	0
mix_16347_1	6	0	0	0	4	0	0	0
mix_16356_1	146	0	0	0	0	0	5	0
mix_16358_1	47	0	0	0	0	0	1	0
mix_16384_1	0	0	0	0	0	0	0	18
mix_16385_1	0	0	0	0	0	0	10	0
mix_16392_1	0	0	0	0	0	0	4	0
mix_16434_1	0	0	0	0	6	0	0	0
mix_16479_1	0	0	0	0	0	0	0	20
mix_16484_1	106	0	0	0	1	0	0	0
mix_1649_1	0	0	0	0	0	0	0	2
mix_1651_2	161	0	0	0	0	0	0	1
mix_16535_1	0	0	0	0	9	0	0	0
mix_16545_1	405	0	0	0	0	0	1	0
mix_16597_1	6	0	0	0	0	0	0	1
mix_16620_1	0	0	0	10	0	0	0	0
mix_16621_2	30	0	6	0	0	0	0	0
mix_16626_1	11	0	0	0	0	6	0	0
mix_1667_1	13	0	0	0	0	0	1	0
mix_16671_1	86	0	0	0	1	0	0	0
mix_16713_1	0	0	0	0	3	0	0	0
mix_1672_1	1418	0	0	0	0	0	0	16
mix_16722_1	0	0	28	0	0	0	0	0
mix_1673_1	99	0	0	0	0	0	1	0
mix_16762_1	0	0	0	0	7	0	0	0
mix_16768_1	0	0	0	0	0	0	0	13
mix_16797_2	53	0	0	0	1	0	0	0
mix_16798_1	0	0	3	0	0	0	0	0
mix_16818_1	0	0	0	0	0	0	0	26
mix_16822_1	35	0	1	0	0	0	0	0
mix_16851_1	532	0	0	0	1	0	0	0
mix_16857_1	0	0	10	0	0	0	0	0
mix_1687_1	0	0	0	0	0	0	3	0
mix_16880_1	1.77	0	9	0	0	0	0	0
mix_1689_1	77	0	0	0	0	0	0	1
mix_169_1	0	0	0	26	0	0	0	0
mix_16932_1	0	0	12	0	0	0	0	0
mix_16960_1	0	0	0	0	6	0	0	0
mix_1699_1	1361	0	0	0	0	0	0	1
mix_16997_1	0	0	0	0	0	0	2	0
mix_17_1	155	0	0	0	0	0	0	1
mix_17023_1	11.09	0	0	0	0	16	0	0
mix_17025_1	181	0	0	0	0	0	1	0
mix_171_1	0	0	0	0	3	0	0	0
mix_17103_1	0	0	0	0	0	0	0	14
mix_1713_2	211	0	0	0	0	32	0	0
mix_17131_1	0	0	2	0	0	0	0	0
mix_17158_1	2.1	0	0	0	0	0	0	1
mix_17256_1	0	0	0	0	8	0	0	0
mix_17291_1	0	0	0	8	0	0	0	0
mix_1734_1	0	0	0	0	0	0	0	12
mix_17355_1	0	0	0	0	0	0	0	17
mix_17366_1	0	0	0	0	0	0	0	16
mix_17387_1	70	0	4	0	0	0	0	0
mix_1740_1	0	0	0	0	7	0	0	0
mix_1742_1	400	0	0	0	0	26	0	0
mix_17441_1	0	0	0	14	0	0	0	0
mix_1745_1	0	0	0	0	14	0	0	0
mix_17513_1	0	0	15	0	0	0	0	0
mix_1752_1	0	0	0	0	0	0	2	0
mix_17527_1	0	0	14	0	0	0	0	0
mix_17603_1	0	0	0	0	5	0	0	0
mix_1763_4	50	0	0	0	1	0	0	0
mix_17649_1	0	0	0	21	0	0	0	0
mix_1766_2	111	0	0	0	0	0	1	0
mix_17685_1	0	0	0	0	0	0	6	0
mix_1776_1	858	0	0	0	0	0	0	1
mix_1776_3	200	0	0	0	1	0	0	0
mix_1779_2	109	0	0	22	0	0	0	0
mix_17807_1	1	0	11	0	0	0	0	0
mix_1782_2	1257	0	0	0	0	0	1	0
mix_1783_1	285	0	0	14	0	0	0	0
mix_17845_1	0	0	0	0	22	0	0	0
mix_17881_1	0	0	0	0	0	0	5	0
mix_17899_1	0	0	0	0	11	0	0	0
mix_1795_1	0	0	0	0	0	0	1	0
mix_17950_1	0	0	9	0	0	0	0	0
mix_17963_1	0	0	0	14	0	0	0	0
mix_180_2	485	0	0	0	5	0	0	0
mix_1800_1	73.77	0	0	0	0	24	0	0
mix_1803_1	215	0	0	0	0	0	1	0
mix_1807_3	110	0	0	0	2	0	0	0
mix_18084_1	0	0	0	26	0	0	0	0
mix_18124_1	0	0	0	0	10	0	0	0
mix_18133_1	0	0	22	0	0	0	0	0
mix_18224_1	0	0	12	0	0	0	0	0
mix_1825_1	0	0	0	0	8	0	0	0
mix_18315_1	0	0	0	0	0	0	5	0
mix_18352_1	0	0	7	0	0	0	0	0
mix_1839_1	145	0	0	0	0	0	0	7
mix_18463_2	0	0	0	0	4	0	0	0
mix_18505_1	0	0	0	0	10	0	0	0
mix_1851_1	530	0	0	0	1	0	0	0
mix_18554_1	0	0	0	0	0	9	0	0
mix_1862_1	0	0	0	0	0	11	0	0
mix_1864_2	517	0	0	0	1	0	0	0
mix_18668_1	0	0	0	0	0	0	0	11
mix_1867_2	131	0	0	0	0	0	0	1
mix_18700_1	0	0	0	0	16	0	0	0
mix_18715_1	0	0	5	0	0	0	0	0
mix_1876_1	92	0	0	12	0	0	0	0
mix_18767_1	0	0	0	0	0	0	11	0
mix_1881_1	0	0	5	0	0	0	0	0
mix_18863_1	0	0	0	0	0	0	6	0
mix_18930_1	0	0	0	0	0	0	0	12
mix_18952_1	0	0	0	0	3	0	0	0
mix_18984_2	111	0	0	0	1	0	0	0
mix_19054_1	171	0	0	0	1	0	0	0
mix_19057_1	0	0	0	0	0	21	0	0
mix_19060_1	0	0	0	15	0	0	0	0
mix_19076_1	0	0	0	0	4	0	0	0
mix_19097_1	293	0	0	0	0	0	1	0
mix_19099_3	250	0	0	0	0	0	1	0
mix_19107_1	59	0	9	0	0	0	0	0
mix_19152_1	493	0	1	0	0	0	0	0
mix_19159_1	2	0	0	12	0	0	0	0
mix_19168_1	782	0	0	0	1	0	0	0
mix_19189_1	190	0	0	0	0	0	1	0
mix_19193_1	86	0	0	0	5	0	0	0
mix_19195_2	204	0	0	0	1	0	0	0
mix_19201_1	0	0	0	0	0	0	3	0
mix_1921_1	0	0	0	0	0	0	1	0
mix_19214_1	111	0	0	0	0	0	0	1
mix_19218_1	0	0	15	0	0	0	0	0
mix_19237_1	0	0	0	15	0	0	0	0
mix_19242_1	33	0	0	0	0	12	0	0
mix_19246_1	0	0	0	0	0	12	0	0
mix_1925_2	59	0	0	0	9	0	0	0
mix_19265_1	299	0	0	0	0	2	0	0
mix_19276_2	1448	0	0	0	0	12	0	0
mix_19276_5	36	0	0	0	0	0	1	0
mix_19293_1	549	0	0	0	0	0	2	0
mix_19312_1	139	0	0	0	1	0	0	0
mix_19321_1	0	0	0	0	0	0	6	0
mix_19332_1	522	0	0	0	0	0	1	0
mix_19339_1	0	0	0	0	7	0	0	0
mix_19378_1	339	0	0	0	1	0	0	0
mix_19393_1	0	0	0	0	0	0	0	9
mix_19395_1	0	0	0	0	9	0	0	0
mix_19399_2	0	0	0	0	3	0	0	0
mix_19414_1	0	0	0	0	4	0	0	0
mix_1945_3	96	0	0	0	0	1	0	0
mix_19491_1	0	0	0	0	10	0	0	0
mix_19503_1	0	0	11	0	0	0	0	0
mix_19591_2	34	0	0	0	0	0	2	0
mix_19619_1	0	0	0	0	0	0	0	10
mix_19640_1	0	0	24	0	0	0	0	0
mix_19642_1	0	0	0	0	4	0	0	0
mix_19646_1	0	0	0	0	0	0	4	0
mix_19666_2	509	0	1	0	0	0	0	0
mix_19681_1	391	0	0	0	1	0	0	0
mix_19793_1	0	0	0	0	18	0	0	0
mix_1983_1	0	0	0	0	10	0	0	0
mix_19847_2	103	0	0	0	1	0	0	0
mix_19848_1	333	0	0	0	0	0	0	1
mix_1986_1	224	0	0	0	1	0	0	0
mix_19869_1	0	0	0	11	0	0	0	0
mix_19879_1	0	0	0	0	15	0	0	0
mix_1991_3	984	0	0	0	0	0	1	0
mix_1991_6	174	0	0	8	0	0	0	0
mix_19930_1	0	0	0	0	0	0	0	14
mix_19982_2	1349	0	0	0	1	0	0	0
mix_20032_1	0	0	0	0	0	21	0	0
mix_2005_2	312	0	0	0	0	0	1	0
mix_20067_1	0	0	0	0	0	0	0	7
mix_20104_1	0	0	0	0	11	0	0	0
mix_2012_1	0	0	0	0	9	0	0	0
mix_20157_1	0	0	0	0	0	0	0	7
mix_20159_1	0	0	9	0	0	0	0	0
mix_20195_1	0	0	20	0	0	0	0	0
mix_2020_1	226	0	0	0	0	6	0	0
mix_2027_1	0	0	0	0	0	0	1	0
mix_20274_1	0	0	0	0	0	0	8	0
mix_2030_1	503	0	1	0	0	0	0	0
mix_20319_1	0	0	9	0	0	0	0	0
mix_20325_1	0	0	0	0	13	0	0	0
mix_20333_1	0	0	0	0	0	0	0	5
mix_20368_1	375	0	0	0	1	0	0	0
mix_2038_1	372	0	0	0	0	0	1	0
mix_20417_1	0	0	0	0	0	0	1	0
mix_20426_1	17	0	0	0	1	0	0	0
mix_20449_1	0	0	17	0	0	0	0	0
mix_2046_1	0	0	0	0	15	0	0	0
mix_20500_1	0	0	0	0	3	0	0	0
mix_20531_1	0	0	0	7	0	0	0	0
mix_2058_1	985	0	0	0	0	14	0	0
mix_2058_3	565	0	0	0	2	0	0	0
mix_20593_1	0	0	0	0	0	0	0	10
mix_2067_1	0	0	0	0	12	0	0	0
mix_20753_1	108	0	0	0	0	0	0	1
mix_2076_1	671.67	0	0	0	0.51	0	0	0
mix_20785_1	0	0	0	0	10	0	0	0
mix_2079_1	662	0	1	0	0	0	0	0
mix_20831_1	0	0	0	0	9	0	0	0
mix_20844_1	0	0	0	4	0	0	0	0
mix_20920_1	0	0	0	0	5	0	0	0
mix_20944_1	0	0	0	0	6	0	0	0
mix_20977_1	0	0	0	0	15	0	0	0
mix_21_1	0	0	0	0	0	0	0	1
mix_210_1	0	0	0	0	9	0	0	0
mix_21005_1	0	0	25	0	0	0	0	0
mix_21025_1	0	0	0	0	0	16	0	0
mix_2105_1	1152	0	0	0	0	0	1	0
mix_2110_1	0	0	0	0	1	0	0	0
mix_21110_1	0	0	0	0	15	0	0	0
mix_2114_1	71	0	0	0	2	0	0	0
mix_2115_3	137	0	0	0	0	0	0	13
mix_2115_4	1479	0	0	0	4	0	0	0
mix_21249_1	0	0	0	0	0	0	8	0
mix_21314_1	0	0	0	0	0	0	0	17
mix_21388_1	0	0	0	0	6	0	0	0
mix_2143_3	981	0	0	0	0	0	0	1
mix_21476_1	0	0	0	30	0	0	0	0
mix_21486_1	0	0	0	0	17	0	0	0
mix_2152_1	1838	0	0	0	0	42	0	0
mix_21533_1	0	0	0	0	0	12	0	0
mix_21545_1	0	0	20	0	0	0	0	0
mix_21564_1	0	0	0	0	0	0	0	12
mix_21657_1	0	0	0	0	0	20	0	0
mix_21678_1	0	0	0	0	14	0	0	0
mix_21719_1	0	0	0	15	0	0	0	0
mix_21745_1	0	0	17	0	0	0	0	0
mix_2181_1	0	0	0	0	0	0	0	9
mix_21819_1	0	0	0	0	18	0	0	0
mix_21820_1	0	0	0	0	0	28	0	0
mix_21827_1	0	0	0	0	0	0	1	0
mix_21871_1	0	0	0	0	0	0	6	0
mix_21927_1	0	0	0	0	0	0	1	0
mix_21992_2	2	0	0	0	0	20	0	0
mix_21999_1	1529	0	0	0	0	0	0	1
mix_22006_1	0	0	0	0	11	0	0	0
mix_22015_7	1126	0	0	0	1	0	0	0
mix_22036_2	552	0	0	0	0	0	1	0
mix_22047_2	814	0	0	0	0	0	2	0
mix_22064_2	25	0	0	0	0	0	2	0
mix_22081_1	118	0	0	16	0	0	0	0
mix_22101_1	209	0	0	0	0	0	0	1
mix_22142_1	266	0	0	0	2	0	0	0
mix_22155_1	205	0	0	0	0	0	1	0
mix_22162_1	66	0	14	0	0	0	0	0
mix_22172_1	124	0	0	0	1	0	0	0
mix_22172_2	61	0	0	19	0	0	0	0
mix_22187_2	101	0	0	0	0	0	0	1
mix_2220_1	136	0	0	0	0	0	1	0
mix_22230_1	200	0	0	0	0	0	1	0
mix_22246_1	169	0	0	0	0	0	0	1
mix_22254_1	0	0	15	0	0	0	0	0
mix_22255_1	0	0	0	0	0	10	0	0
mix_22259_1	0	0	0	0	1	0	0	0
mix_22268_2	136	0	0	0	1	0	0	0
mix_2228_2	101	0	10	0	0	0	0	0
mix_22284_1	0	0	0	7	0	0	0	0
mix_22287_2	74	0	0	0	0	0	1	0
mix_2237_1	0	0	0	0	0	0	0	43
mix_22386_1	3	0	0	0	3	0	0	0
mix_22389_1	0	0	8	0	0	0	0	0
mix_22395_1	0	0	0	0	0	23	0	0
mix_22396_4	90	0	0	1	0	0	0	0
mix_22414_1	1.48	0	0	0	6	0	0	0
mix_22423_1	118.44	0	0	0	1	0	0	0
mix_22482_2	243	0	0	0	5	0	0	0
mix_22489_1	83	0	0	0	0	1	0	0
mix_2249_1	0	0	0	0	0	0	0	36
mix_22509_1	2944	0	0	0	0	0	3	0
mix_22516_2	330	0	0	0	0	12	0	0
mix_22519_1	0	0	0	0	0	0	0	31
mix_22530_1	0	0	0	0	7	0	0	0
mix_22536_1	0	0	0	0	0	12	0	0
mix_22540_3	76	0	0	0	0	0	4	0
mix_22579_1	875	0	0	0	0	0	1	0
mix_22579_2	674	0	0	1	0	0	0	0
mix_22589_1	613	0	0	0	0	0	1	0
mix_2266_1	0	0	0	0	6	0	0	0
mix_22660_1	0	0	0	0	10	0	0	0
mix_22660_2	48	0	0	15	0	0	0	0
mix_22692_1	0	0	0	0	41	0	0	0
mix_22719_1	252	0	1	0	0	0	0	0
mix_22720_1	0	0	0	0	12	0	0	0
mix_22756_1	5	0	0	0	1	0	0	0
mix_22798_1	21	0	0	7	0	0	0	0
mix_22800_1	0	0	0	0	9	0	0	0
mix_22805_2	3	0	0	0	0	0	5	0
mix_2282_1	80	0	0	13	0	0	0	0
mix_22872_1	0	0	14	0	0	0	0	0
mix_22883_1	91	0	0	0	0	18	0	0
mix_22893_1	0	0	0	0	0	0	2	0
mix_22908_1	94	0	0	1	0	0	0	0
mix_22910_1	0	0	0	0	7	0	0	0
mix_22923_1	211	0	1	0	0	0	0	0
mix_22945_1	0	0	13	0	0	0	0	0
mix_22965_1	176	0	0	0	0	0	1	0
mix_22978_1	420	0	1	0	0	0	0	0
mix_23026_1	0	0	0	0	0	0	2	0
mix_23055_1	0	0	0	24	0	0	0	0
mix_23060_1	51	0	0	1	0	0	0	0
mix_23074_1	0	0	0	0	0	11	0	0
mix_23124_1	0	0	0	0	7	0	0	0
mix_23207_1	0	0	0	7	0	0	0	0
mix_23219_2	0	0	0	13	0	0	0	0
mix_23224_1	0	0	0	0	0	21	0	0
mix_23233_1	0	0	0	0	9	0	0	0
mix_23237_1	0	0	0	0	14	0	0	0
mix_23254_1	0	0	0	0	0	0	0	17
mix_23320_1	0	0	0	0	0	0	0	12
mix_2338_1	0	0	0	0	4	0	0	0
mix_2344_1	24	0	0	19	0	0	0	0
mix_23474_1	0	0	0	18	0	0	0	0
mix_23590_1	4.12	0	5	0	0	0	0	0
mix_23600_1	0	0	21	0	0	0	0	0
mix_23602_1	0	0	0	28	0	0	0	0
mix_23615_1	0	0	0	0	0	0	4	0
mix_2362_1	308	0	0	0	0	14	0	0
mix_23660_1	0	0	0	0	0	0	9	0
mix_23685_1	0	0	0	0	0	0	0	14
mix_23693_1	0	0	28	0	0	0	0	0
mix_23703_1	0	0	0	0	0	0	1	0
mix_2373_3	110	0	0	0	0	0	0	16
mix_23735_1	0	0	0	0	0	0	0	10
mix_23742_1	0	0	0	0	0	0	7	0
mix_2384_1	71	0	0	0	0	27	0	0
mix_24022_1	0	0	0	0	0	0	0	4
mix_24026_1	0	0	0	0	0	26	0	0
mix_24058_1	0	0	0	0	7	0	0	0
mix_2407_2	498	0	0	0	1	0	0	0
mix_2407_3	224	0	0	0	0	19	0	0
mix_2407_4	83	0	9	0	0	0	0	0
mix_2407_6	61	0	0	0	0	0	0	6
mix_24178_1	0	0	0	0	5	0	0	0
mix_24236_1	0	0	0	0	0	11	0	0
mix_2428_3	391	0	0	0	0	0	1	0
mix_24284_1	0	0	7	0	0	0	0	0
mix_24357_1	0	0	21	0	0	0	0	0
mix_24396_1	0	0	0	0	0	11	0	0
mix_24424_1	0	0	0	0	1	0	0	0
mix_2443_2	106	0	0	0	0	0	0	1
mix_24493_1	0	0	0	0	0	0	7	0
mix_24697_1	0	0	0	0	0	0	3	0
mix_24700_1	0	0	0	0	0	15	0	0
mix_24733_1	0	0	0	0	0	0	0	13
mix_2474_1	0	0	0	0	48	0	0	0
mix_2476_3	759	0	1	0	0	0	0	0
mix_24784_1	0	0	0	0	12	0	0	0
mix_24785_1	0	0	0	0	0	0	6	0
mix_2480_2	239	0	0	0	0	9	0	0
mix_24843_1	0	0	0	0	0	0	0	17
mix_2488_1	0	0	0	0	5	0	0	0
mix_2499_1	8	0	6	0	0	0	0	0
mix_2514_2	738	0	0	0	0	9	0	0
mix_2515_1	0	0	0	0	6	0	0	0
mix_2520_1	33	0	0	0	0	9	0	0
mix_2542_1	168	0	0	0	0	15	0	0
mix_2545_1	64	0	0	0	0	0	1	0
mix_2560_1	1753	0	0	0	1	0	0	0
mix_2570_1	257	0	0	0	2	0	0	0
mix_2625_1	1	0	0	0	9	0	0	0
mix_2629_2	49.85	0	0	0	8	0	0	0
mix_2646_1	187	0	0	0	0	0	0	8
mix_2646_2	69	0	1	0	0	0	0	0
mix_2646_6	684	0	0	0	1	0	0	0
mix_266_1	6	0	0	0	0	13	0	0
mix_2661_1	181	0	1	0	0	0	0	0
mix_2673_1	0	0	0	18	0	0	0	0
mix_2674_1	0	0	0	0	3	0	0	0
mix_2682_1	1	0	14	0	0	0	0	0
mix_2684_1	186	0	0	0	1	0	0	0
mix_2709_1	0	0	0	0	0	0	6	0
mix_2718_1	0	0	0	0	0	0	12	0
mix_2724_1	30	0	20	0	0	0	0	0
mix_2727_3	925	0	0	0	1	0	0	0
mix_2742_1	0	0	0	0	0	0	4	0
mix_2757_1	0	0	0	8	0	0	0	0
mix_2763_3	187	0	0	0	0	0	1	0
mix_2763_4	403	0	0	0	1	0	0	0
mix_2774_2	77	0	1	0	0	0	0	0
mix_278_1	0	0	0	0	9	0	0	0
mix_2815_1	0	0	0	0	0	0	7	0
mix_2890_1	21	0	0	0	0	0	0	28
mix_2894_1	0	0	0	0	0	0	15	0
mix_2898_1	0	0	0	0	0	0	9	0
mix_2908_1	455	0	0	1	0	0	0	0
mix_2915_1	0	0	0	0	6	0	0	0
mix_2936_1	0	0	0	0	6	0	0	0
mix_2968_1	0	0	0	0	10	0	0	0
mix_2987_1	12	0	10	0	0	0	0	0
mix_3005_2	200	0	0	0	0	5	0	0
mix_3009_11	3223	0	0	0	0	30	0	0
mix_3009_12	1084	0	0	0	0	0	1	0
mix_3009_3	108	0	0	0	0	0	1	0
mix_3009_5	251	0	0	0	1	0	0	0
mix_3009_7	172	0	0	0	7	0	0	0
mix_3022_3	1598	0	0	0	10	0	0	0
mix_3024_1	0	0	6	0	0	0	0	0
mix_3027_1	15	0	0	0	6	0	0	0
mix_3045_4	272	0	1	0	0	0	0	0
mix_3049_2	137	0	0	0	0	0	1	0
mix_3052_2	52	0	0	0	0	28	0	0
mix_3063_3	113	0	0	0	0	0	0	1
mix_3069_2	24	0	0	0	1	0	0	0
mix_3076_1	32	0	0	0	1	0	0	0
mix_3079_1	49	0	0	1	0	0	0	0
mix_3090_1	302	0	0	0	0	0	4	0
mix_3113_1	0	0	0	0	0	0	7	0
mix_3116_2	122	0	0	0	0	0	1	0
mix_3139_4	43	0	0	0	1	0	0	0
mix_3143_2	66	0	0	0	1	0	0	0
mix_3149_3	544	0	0	0	0	10	0	0
mix_3149_6	7	0	0	0	0	37	0	0
mix_3158_1	0	0	0	0	10	0	0	0
mix_3163_2	487	0	0	0	0	0	1	0
mix_3173_1	449	0	0	26	0	0	0	0
mix_3173_3	36	0	0	0	0	14	0	0
mix_3186_1	97	0	0	0	1	0	0	0
mix_3186_6	705	0	0	0	0	0	2	0
mix_3188_1	30	0	16	0	0	0	0	0
mix_3215_2	75	0	0	4	0	0	0	0
mix_3219_3	195	0	15	0	0	0	0	0
mix_3219_6	225	0	0	0	6	0	0	0
mix_3228_1	174	0	0	0	0	8	0	0
mix_3230_1	185	0	0	0	1	0	0	0
mix_3249_1	0	0	0	0	0	37	0	0
mix_325_1	363	0	0	0	1	0	0	0
mix_326_1	0	0	0	0	5	0	0	0
mix_3265_1	131	0	0	0	0	0	2	0
mix_327_2	95	0	18	0	0	0	0	0
mix_3293_3	318	0	0	0	0	9	0	0
mix_3295_1	1263	0	0	0	2	0	0	0
mix_3296_1	111	0	18	0	0	0	0	0
mix_3296_3	72	0	0	0	0	0	1	0
mix_3296_8	23	0	0	0	0	0	1	0
mix_3296_9	229	0	0	0	0	0	1	0
mix_3304_1	0	0	0	0	0	0	4	0
mix_3318_2	99	0	0	0	0	0	0	33
mix_332_1	0	0	0	0	11	0	0	0
mix_3330_1	236	0	25	0	0	0	0	0
mix_3347_1	0	0	0	0	0	0	1	0
mix_3359_1	0	0	0	0	0	0	1	0
mix_3362_1	0	0	0	0	8	0	0	0
mix_3364_4	223	0	0	2	0	0	0	0
mix_3365_1	40	0	0	0	0	0	6	0
mix_3375_1	99	0	0	0	0	0	1	0
mix_3384_1	0	0	0	0	0	0	2	0
mix_3403_1	0	0	0	0	2	0	0	0
mix_3414_3	711	0	0	0	0	15	0	0
mix_3419_3	1695	0	23	0	0	0	0	0
mix_3470_2	82	0	7	0	0	0	0	0
mix_3470_4	494	0	22	0	0	0	0	0
mix_3486_1	1074	0	0	0	1	0	0	0
mix_3486_13	185	0	0	0	0	0	0	1
mix_3492_1	269	0	0	0	0	0	3	0
mix_3509_2	531	0	0	0	0	0	0	3
mix_3537_4	247	0	0	0	0	0	1	0
mix_3562_1	697	0	0	0	0	0	0	1
mix_3562_4	258	0	0	0	0	0	1	0
mix_3567_2	349	0	0	0	0	0	2	0
mix_3583_1	547	0	0	0	0	0	1	0
mix_3614_1	291	0	0	2	0	0	0	0
mix_3620_1	203	0	0	0	0	34	0	0
mix_3620_4	200	0	0	0	7	0	0	0
mix_3627_1	0	0	0	0	0	0	6	0
mix_3629_1	226	0	13	0	0	0	0	0
mix_3637_1	33	0	0	9	0	0	0	0
mix_3646_1	0	0	0	0	9	0	0	0
mix_3664_3	283	0	0	0	0	0	1	0
mix_3704_3	211	0	0	0	0	48	0	0
mix_3705_1	0	0	0	0	9	0	0	0
mix_3718_1	0	0	0	0	0	0	19	0
mix_3720_1	0	0	0	9	0	0	0	0
mix_3749_1	0	0	0	0	24	0	0	0
mix_3783_3	1467	0	0	0	1	0	0	0
mix_3816_1	0	0	0	0	30	0	0	0
mix_382_1	0	0	0	0	6	0	0	0
mix_3858_1	0	0	0	0	0	0	2	0
mix_3861_2	174	0	1	0	0	0	0	0
mix_3863_1	0	0	0	16	0	0	0	0
mix_3875_3	225	0	0	0	0	1	0	0
mix_3886_1	89	0	0	0	6	0	0	0
mix_389_1	1	0	0	0	0	17	0	0
mix_3907_1	1	0	0	0	0	13	0	0
mix_3917_1	0	0	0	0	0	0	16	0
mix_393_1	39	0	0	0	1	0	0	0
mix_3955_1	210	0	0	0	1	0	0	0
mix_3977_1	235	0	1	0	0	0	0	0
mix_3977_2	0.01	0	0	0	0	13	0	0
mix_3978_4	132	0	0	0	7	0	0	0
mix_3980_2	156	0	0	0	0	0	0	1
mix_3983_1	0	0	0	0	1.82	0	0	0
mix_3992_1	631	0	0	0	0	0	2	0
mix_3995_1	60	0	0	0	1	0	0	0
mix_3995_5	147	0	0	0	0	1	0	0
mix_4003_1	257	0	0	0	0	18	0	0
mix_4005_1	0	0	0	0	0	20	0	0
mix_4017_1	226	0	0	0	1	0	0	0
mix_4027_1	0	0	0	0	4	0	0	0
mix_4035_2	351.97	0	0	0	0	15	0	0
mix_4037_1	0	0	0	0	0	13	0	0
mix_405_1	36	0	0	0	4	0	0	0
mix_4052_4	74	0	0	0	0	0	0	1
mix_4066_3	20	0	0	0	0	0	1	0
mix_4068_1	0	0	0	0	17	0	0	0
mix_407_2	35	0	0	0	5	0	0	0
mix_410_1	662	0	0	0	0	0	3	0
mix_413_1	0	0	6	0	0	0	0	0
mix_4148_4	90	0	0	0	0	0	1	0
mix_4152_1	0	0	0	0	0	0	0	10
mix_4180_1	712	0	0	0	1	0	0	0
mix_4181_5	83	0	0	10	0	0	0	0
mix_4187_1	0	0	0	0	0	0	3	0
mix_4215_1	0	0	0	0	2	0	0	0
mix_4216_1	0	0	0	16	0	0	0	0
mix_4217_1	0	0	0	0	0	0	2	0
mix_4250_1	0	0	0	0	44	0	0	0
mix_4271_1	0	0	0	0	0	0	5	0
mix_4278_3	83	0	0	9	0	0	0	0
mix_4286_4	205	0	0	0	0	16	0	0
mix_4301_2	125	0	0	0	0	23	0	0
mix_4310_2	277	0	0	0	0	16	0	0
mix_4345_1	121	0	0	0	0	0	0	1
mix_435_1	0	0	19	0	0	0	0	0
mix_4372_1	0	0	0	0	10	0	0	0
mix_4389_1	0	0	0	0	0	0	2	0
mix_4390_4	914	0	0	0	0	0	1	0
mix_4391_1	923	0	0	0	0	0	0	1
mix_4395_1	165	0	0	0	1	0	0	0
mix_4395_7	281	0	7	0	0	0	0	0
mix_4396_10	398	0	0	0	0	0	1	0
mix_441_1	288	0	0	0	0	0	1	0
mix_4420_2	1080	0	0	0	1	0	0	0
mix_4438_1	303	0	22	0	0	0	0	0
mix_4440_1	409	0	0	0	0	0	1	0
mix_4482_1	0	0	0	0	0	21	0	0
mix_4485_1	1332	0	0	0	0	0	1	0
mix_4491_1	0	0	6	0	0	0	0	0
mix_4493_1	0	0	16	0	0	0	0	0
mix_4511_1	0	0	0	0	13	0	0	0
mix_4525_1	0	0	0	0	0	0	41	0
mix_4532_1	61.89	0	14	0	0	0	0	0
mix_4588_2	115	0	0	0	0	0	1	0
mix_462_1	86	0	1	0	0	0	0	0
mix_463_1	0	0	0	0	11	0	0	0
mix_4637_2	171	0	0	0	8	0	0	0
mix_4716_1	333	0	0	0	0	0	1	0
mix_4731_1	0	0	0	0	0	0	0	7
mix_4756_1	0	0	0	0	6	0	0	0
mix_4763_1	0	0	0	0	5	0	0	0
mix_4764_1	111	0	0	0	0	0	0	1
mix_4768_1	103	0	0	0	0	1	0	0
mix_477_10	177	0	0	0	0	0	1	0
mix_477_3	1135	0	0	0	0	0	1	0
mix_4790_2	26	0	1	0	0	0	0	0
mix_482_1	175	0	0	0	0	26	0	0
mix_4820_1	0	0	0	90	0	0	0	0
mix_483_1	21	0	11	0	0	0	0	0
mix_484_2	381	0	14	0	0	0	0	0
mix_4851_1	774.84	0	1	0	0	0	0	0
mix_4851_3	1048	0	0	0	0	1	0	0
mix_4851_4	92	0	0	0	0	0	1	0
mix_4851_5	93	0	16	0	0	0	0	0
mix_4851_7	1072	0	0	0	0	0	1	0
mix_4859_2	184	0	17	0	0	0	0	0
mix_4859_3	174	0	1	0	0	0	0	0
mix_4868_5	137	0	0	7	0	0	0	0
mix_4868_7	609	0	0	0	0	0	1	0
mix_488_2	98	0	0	0	0	11	0	0
mix_4915_1	0	0	13	0	0	0	0	0
mix_4922_1	69	0	0	0	0	7	0	0
mix_493_1	1273	0	0	0	0	0	1	0
mix_493_3	49	0	0	0	0	0	0	12
mix_4955_1	75	0	0	0	1	0	0	0
mix_496_2	79	0	0	0	0	15	0	0
mix_4963_1	0	0	0	0	0	23	0	0
mix_4968_2	0	0	0	0	0	0	11	0
mix_5001_2	22	0	0	0	0	9	0	0
mix_5019_14	16	0	22	0	0	0	0	0
mix_5039_1	0	0	0	0	0	0	1.11	0
mix_5053_2	1	0	15	0	0	0	0	0
mix_5061_1	0	0	0	0	0	0	9	0
mix_5071_1	1	0	0	0	0	0	0	2
mix_5110_2	24	0	0	28	0	0	0	0
mix_5110_3	521	0	0	0	0	0	1	0
mix_5110_5	509	0	0	0	0	0	2	0
mix_5114_2	417	0	0	0	0	25	0	0
mix_5121_2	317	0	0	41	0	0	0	0
mix_514_1	210	0	0	0	0	0	1	0
mix_5143_1	0	0	0	0	0	0	0	3
mix_5206_1	67	0	17	0	0	0	0	0
mix_5209_2	121	0	0	0	0	19	0	0
mix_521_1	0	0	0	0	0	11	0	0
mix_5211_2	469	0	0	29	0	0	0	0
mix_5220_1	240	0	0	0	0	0	1	0
mix_5222_3	121	0	0	0	1	0	0	0
mix_5244_1	82	0	0	0	0	0	1	0
mix_5248_3	1332	0	0	0	1	0	0	0
mix_525_3	209	0	0	0	0	23	0	0
mix_5251_3	240	0	0	0	0	15	0	0
mix_5251_6	260	0	18	0	0	0	0	0
mix_5251_7	140	0	0	1	0	0	0	0
mix_5251_9	134	0	0	0	0	0	1	0
mix_5274_1	0	0	0	0	0	48	0	0
mix_5275_1	0	0	0	0	0	70	0	0
mix_5276_1	0	0	0	0	0	0	0	16
mix_5305_1	0	0	0	7	0	0	0	0
mix_5325_9	134	0	0	0	1	0	0	0
mix_533_1	495	0	0	0	0	0	0	8
mix_533_5	1114	0	0	0	0	0	1	0
mix_5332_1	53	0	0	0	0	16	0	0
mix_538_1	45	0	0	0	0	0	3	0
mix_5394_4	0	0	0	0	3	0	0	0
mix_5431_1	0	0	0	0	0	0	1	0
mix_5432_2	78	0	0	0	0	0	0	1
mix_5441_1	0	0	0	0	0	0	1	0
mix_545_1	435	0	0	0	0	0	0	1
mix_545_2	514	0	0	0	1	0	0	0
mix_5458_3	201	0	0	0	0	0	1	0
mix_5458_4	353	0	0	0	1	0	0	0
mix_5458_9	85	0	0	1	0	0	0	0
mix_5477_1	0	0	0	13	0	0	0	0
mix_5480_5	750	0	3	0	0	0	0	0
mix_5503_4	272	0	0	0	0	0	1	0
mix_555_3	53	0	0	0	0	0	0	1
mix_5606_5	100	0	9	0	0	0	0	0
mix_5606_6	138	0	0	0	1	0	0	0
mix_5606_7	466	0	0	0	0	25	0	0
mix_5611_1	0	0	0	9	0	0	0	0
mix_5615_1	0	0	0	0	0	0	0	19
mix_5618_1	0	0	0	30	0	0	0	0
mix_5722_2	20	0	0	0	0	13	0	0
mix_5729_1	0	0	0	0	0	0	2	0
mix_5740_1	97	0	0	0	0	0	0	8
mix_576_1	0	0	0	0	11	0	0	0
mix_5760_3	252	0	0	0	0	0	2	0
mix_5773_1	425	0	0	0	0	0	1	0
mix_5773_5	53	0	12	0	0	0	0	0
mix_5773_6	57	0	14	0	0	0	0	0
mix_5782_2	184	0	0	0	0	1	0	0
mix_5787_4	314	0	0	0	0	0	1	0
mix_5790_4	59	0	0	0	3	0	0	0
mix_5804_1	340	0	0	0	0	14	0	0
mix_5804_5	70	0	0	0	4	0	0	0
mix_5813_4	103	0	0	0	0	0	0	24
mix_5827_1	0	0	0	0	0	0	8	0
mix_5830_2	450	0	0	0	0	0	4	0
mix_5830_4	228	0	0	0	0	0	1	0
mix_601_1	30	0	0	0	1	0	0	0
mix_6075_2	0	0	0	0	0	10	0	0
mix_6099_2	1115	0	0	0	0	0	1	0
mix_6099_3	220	0	0	0	0	19	0	0
mix_6101_3	772	0	0	0	0	0	2	0
mix_6115_1	0	0	0	0	0	0	4.89	0
mix_6141_2	411	0	0	0	3	0	0	0
mix_6153_3	81	0	0	0	0	0	0	1
mix_6183_1	450	0	0	0	0	12	0	0
mix_620_1	0	0	0	0	0	19	0	0
mix_6245_4	370	0	0	0	2	0	0	0
mix_6245_5	356	0	0	0	0	0	0	1
mix_6245_7	864	0	0	1	0	0	0	0
mix_6245_9	957	0	0	0	0	0	1	0
mix_6247_5	922	0	0	0	0	0	2	0
mix_628_5	243	0	0	0	0	0	0	1
mix_6341_1	0	0	0	0	0	14	0	0
mix_6374_1	83	0	0	0	0	0	7	0
mix_6374_13	686	0	0	0	0	0	1	0
mix_6374_2	470	0	0	0	2	0	0	0
mix_6374_3	20	0	0	0	0	17	0	0
mix_6414_1	0	0	0	0	0	20	0	0
mix_6424_1	0	0	0	0	3	0	0	0
mix_652_2	17	0	14	0	0	0	0	0
mix_656_2	9	0	3	0	0	0	0	0
mix_661_1	0	0	0	0	0	0	0	13
mix_6613_1	0	0	0	0	0	0	0	6
mix_666_1	0	0	0	0	5	0	0	0
mix_6682_1	165	0	13	0	0	0	0	0
mix_679_2	401	0	0	0	0	0	1	0
mix_6815_8	222	0	0	0	1	0	0	0
mix_682_2	500	0	0	0	0	0	6	0
mix_6821_2	107	0	0	0	8	0	0	0
mix_6821_3	421	0	0	0	2	0	0	0
mix_6822_1	0	0	0	0	11	0	0	0
mix_6829_1	0	0	0	0	0	46	0	0
mix_686_1	5	0	0	0	0	0	8	0
mix_6870_1	0	0	10	0	0	0	0	0
mix_689_1	71	0	0	0	6	0	0	0
mix_70_1	76	0	0	0	0	4	0	0
mix_716_2	349	0	0	0	1	0	0	0
mix_716_4	124	0	0	0	0	0	0	1
mix_7188_1	0	0	0	0	0	0	4	0
mix_719_1	259	0	32	0	0	0	0	0
mix_72_1	503	0	0	0	1	0	0	0
mix_7201_1	0	0	0	0	0	0	12	0
mix_7208_3	202	0	0	0	0	0	0	1
mix_7213_2	294	0	0	21	0	0	0	0
mix_7213_4	653	0	0	1	0	0	0	0
mix_7219_1	113	0	0	0	0	0	0	1
mix_7255_1	0	0	0	0	0	11	0	0
mix_7271_1	0	0	0	0	0	0	1	0
mix_7299_1	0	0	0	0	0	0	1	0
mix_7318_1	75	0	8	0	0	0	0	0
mix_740_1	0	0	0	0	0	23	0	0
mix_744_1	0	0	0	0	0	0	4	0
mix_7444_1	0	0	0	0	0	3	0	0
mix_753_1	0	0	0	0	24	0	0	0
mix_7545_1	0	0	0	0	0	0	0	1
mix_7589_1	0	0	0	0	5	0	0	0
mix_7598_1	0	0	0	6	0	0	0	0
mix_763_2	57	0	0	0	0	13	0	0
mix_765_1	9	0	0	0	0	0	0	16
mix_767_1	27	0	0	0	0	0	0	12
mix_7691_1	0	0	15	0	0	0	0	0
mix_770_2	908	0	0	0	0	0	2	0
mix_7743_6	0	0	0	0	0	27	0	0
mix_7743_9	0	0	6	0	0	0	0	0
mix_7756_1	0	0	0	0	0	0	1	0
mix_776_1	0	0	0	0	6	0	0	0
mix_7830_1	0	0	8	0	0	0	0	0
mix_79_2	174	0	0	0	1	0	0	0
mix_79_5	13	0	0	0	1	0	0	0
mix_8009_1	292	0	0	0	0	0	0	1
mix_8089_1	84	0	0	0	0	0	1	0
mix_8113_2	12	0	0	0	1	0	0	0
mix_8133_1	69	0	0	0	0	0	1	0
mix_8179_2	402	0	0	0	1	0	0	0
mix_8180_2	1176	0	0	0	0	0	4	0
mix_8207_1	19	0	0	0	0	0	0	1
mix_8213_1	199	0	0	0	0	28	0	0
mix_8217_1	16	0	1	0	0	0	0	0
mix_8223_1	406	0	0	0	0	0	1	0
mix_8223_2	142	0	0	0	5	0	0	0
mix_8227_1	175	0	0	0	0	0	0	1
mix_8246_3	154	0	0	0	0	0	0	10
mix_8248_1	1237	0	0	0	0	0	1	0
mix_8249_1	0	0	0	16	0	0	0	0
mix_8255_1	0	0	0	0	3	0	0	0
mix_8275_1	67	0	0	0	0	20	0	0
mix_8277_3	586	0	1	0	0	0	0	0
mix_8301_1	88	0	0	0	0	0	0	1
mix_8311_1	81	0	0	0	0	0	6	0
mix_8313_2	446	0	0	0	0	0	1	0
mix_8323_1	0	0	0	0	3	0	0	0
mix_8329_1	0	0	0	0	0	0	0	25
mix_8357_2	24	0	0	0	0	0	1	0
mix_8377_1	175	0	0	0	0	17	0	0
mix_839_1	0	0	0	0	0	0	0	7
mix_8404_1	48	0	0	0	0	0	0	6
mix_8407_1	21	0	0	0	0	0	6	0
mix_846_1	191	0	0	0	0	0	0	2
mix_847_1	0	0	0	19	0	0	0	0
mix_8470_1	12	0	0	0	0	1	0	0
mix_8494_1	0	0	0	0	1	0	0	0
mix_85_1	403	0	0	0	1	0	0	0
mix_8564_1	25	0	0	0	0	0	0	10
mix_8579_2	57	0	0	0	1	0	0	0
mix_8585_1	0	0	0	0	0	0	9	0
mix_8595_1	0	0	0	22	0	0	0	0
mix_8628_1	0	0	32	0	0	0	0	0
mix_8856_1	0	0	0	4	0	0	0	0
mix_8902_1	232	0	0	0	0	0	1	0
mix_8921_1	0	0	0	0	0	21	0	0
mix_9006_1	0	0	0	0	0	0	0	34
mix_905_1	0	0	10	0	0	0	0	0
mix_907_1	328	0	7	0	0	0	0	0
mix_9081_2	126	0	0	0	1	0	0	0
mix_9116_2	136	0	0	0	0	0	1	0
mix_9146_1	0	0	0	0	0	0	6	0
mix_9157_1	3	0	1	0	0	0	0	0
mix_9159_1	0	0	0	0	4	0	0	0
mix_9258_1	0	0	0	0	0	0	5	0
mix_930_1	0	0	0	0	5	0	0	0
mix_9354_1	0	0	0	0	7	0	0	0
mix_9442_1	0	0	0	9	0	0	0	0
mix_947_2	57	0	0	0	20	0	0	0
mix_95_1	0	0	0	0	25	0	0	0
mix_9504_1	0	0	0	0	0	0	3	0
mix_9510_1	0	0	0	0	0	0	7	0
mix_9536_1	0	0	0	0	19	0	0	0
mix_956_1	0	0	0	0	0	0	1	0
mix_9570_1	4	0	10	0	0	0	0	0
mix_959_1	59	0	0	0	0	0	0	8
mix_9598_1	0	0	0	0	6	0	0	0
mix_96_3	51	0	0	13	0	0	0	0
mix_9625_1	0	0	4	0	0	0	0	0
mix_9641_1	0	0	11	0	0	0	0	0
mix_9661_1	0	0	0	0	0	12	0	0
mix_9664_1	0	0	0	0	0	12	0	0
mix_9772_1	0	0	0	0	0	0	11	0
mix_980_2	766	0	0	0	0	34	0	0
mix_980_3	308	0	0	0	0	0	1	0
mix_9807_1	0	0	0	0	0	0	4	0
mix_9829_1	0	0	0	0	0	0	2	0
mix_9843_1	0	0	6	0	0	0	0	0
mix_9844_1	0	0	0	0	0	0	1	0
mix_99_1	51	0	0	0	0	1	0	0
mix_9929_1	0	0	0	0	7	0	0	0
mix_9953_1	0	0	11	0	0	0	0	0
mix_9961_1	0	0	0	0	0	23	0	0
mix_9962_1	0	0	0	0	0	8	0	0
mix_997_2	74	0	0	0	0	0	0	17
mix_998_3	33.2	0	0	0	1	0	0	0
mix_999_1	975	0	0	0	1	0	0	0
mix_1002_3	119	0	0	0	1	0	0	1
mix_10274_1	0	0	0	0	25	0	1	0
mix_10343_2	831.59	0	0	0	2	0	1	0
mix_10387_1	0	0	0	0	0	34	12	0
mix_10593_1	88	0	1	1	0	0	0	0
mix_113_1	0	0	27	0	6	0	0	0
mix_11342_1	801	0	0	1	0	0	0	2
mix_1165_1	0	0	0	0	0	0	5	6
mix_11925_1	0	0	0	0	13	24	0	0
mix_12202_1	0	0	28	0	53	0	0	0
mix_1236_1	0	0	0	13	0	17	0	0
mix_1285_1	2257	0	1	0	0	59	0	0
mix_13131_1	0	0	0	0	8	0	4	0
mix_13206_1	87	0	0	0	0	8	0	1
mix_1323_1	0	0	0	0	0	0	2	1
mix_13398_1	1134	0	0	0	0	0	1	1
mix_13419_1	14	0	0	9	0	0	0	7
mix_13527_2	926	0	0	0	1	0	2	0
mix_13528_2	654	0	0	0	1	0	1	0
mix_1366_1	146	0	0	0	1	4	0	0
mix_13779_1	309	0	0	0	1	1	0	0
mix_13931_4	1039	0	0	0	9	31	0	0
mix_14040_1	0	0	0	0	6	0	0	13
mix_1417_1	16	0	0	0	7	0	6	0
mix_14202_1	0	0	0	0	7	0	4	0
mix_14366_1	280	0	0	0	0	6	1	0
mix_1448_1	0	0	3	0	22	0	0	0
mix_1598_1	98	0	0	14	7	0	0	0
mix_16052_5	864	0	0	0	2	0	0	1
mix_16057_1	2824	0	0	0	2	0	2	0
mix_16099_1	173	0	12	0	0	0	0	1
mix_16126_2	725	0	0	1	1	0	0	0
mix_16131_2	647	0	0	0	0	42	2	0
mix_16168_1	490	0	0	0	1	0	0	1
mix_16231_2	1293	0	0	0	0	20	1	0
mix_16264_1	820	0	0	0	3	16	0	0
mix_16318_1	507	0	0	0	1	0	1	0
mix_16424_1	407	0	0	0	1	1	0	0
mix_16425_2	465	0	0	0	0	41	1	0
mix_1645_1	0	0	0	15	0	0	0	21
mix_16480_1	155	0	0	0	1	0	1	0
mix_1664_1	831	0	0	0	1	0	7	0
mix_17012_2	158	0	0	0	1	0	0	1
mix_17127_1	0	0	0	19	0	0	6	0
mix_1727_4	803	0	0	0	1	0	0	1
mix_17319_1	0	0	27	0	12	0	0	0
mix_17611_2	724	0	0	0	1	29	0	0
mix_1762_1	275	0	0	0	1	0	0	1
mix_1763_2	581	0	0	0	1	0	0	1
mix_1783_2	118	0	2	0	1	0	0	0
mix_1791_1	0	0	0	4	35	0	0	0
mix_1807_2	1627	0	0	0	0	13	0	6
mix_1809_1	1034	0	0	0	0	29	0	1
mix_1831_1	0	0	0	0	12	0	3	0
mix_1845_1	0	0	37	0	0	0	4	0
mix_1878_1	2	0	14	0	15	0	0	0
mix_19018_1	19	0	3	3	0	0	0	0
mix_19066_3	6522	0	0	0	0	70	10	0
mix_19149_1	0	0	13	0	1	0	0	0
mix_19195_1	930	0	0	0	0	7	0	1
mix_19195_3	680	0	1	0	0	0	1	0
mix_19267_4	1652	0	0	0	2	0	1	0
mix_19273_1	2875	0	0	0	1	0	1	0
mix_19276_1	666	0	0	0	0	35	1	0
mix_19403_1	0	0	0	0	11	19	0	0
mix_19467_1	1746	0	0	0	0	0	1	1
mix_19492_1	1912	0	0	0	1	0	0	2
mix_1952_1	0	0	17	0	10	0	0	0
mix_19557_1	1009	0	0	1	1	0	0	0
mix_1982_1	0	0	0	0	8	0	7	0
mix_19847_1	340	0	1	0	1	0	0	0
mix_19982_1	448	0	0	0	1	0	0	1
mix_2000_1	612	0	0	0	9	0	0	11
mix_2018_1	171	0	0	0	0	0	1	1
mix_2055_1	236	0	0	21	0	14	0	0
mix_2068_1	646	0	0	0	1	1	0	0
mix_2074_1	1318.33	0	0	0	1.49	0	0	1
mix_20812_1	0	0	0	0	11	0	7	0
mix_2115_7	299	0	0	0	1	0	0	1
mix_2116_1	0	0	0	0	3	0	3	0
mix_21477_1	0	0	0	0	0	0	4	1
mix_2152_2	875	0	0	0	1	31	0	0
mix_21918_1	0	0	0	0	4	0	7	0
mix_21925_1	0	0	0	14	0	0	0	25
mix_21996_1	2427	0	0	0	0	24	1	0
mix_22015_1	1118	0	0	0	1	0	1	0
mix_22015_6	864	0	0	0	0	17	0	1
mix_2203_1	0	0	0	16	0	0	5	0
mix_2207_1	0	0	0	0	8.43	9.97	0	0
mix_22150_1	362	0	0	0	1	0	1	0
mix_22169_1	195	0	0	0	0	1	0	13
mix_22182_1	352	0	6	0	0	0	1	0
mix_22191_1	829	0	0	1	0	0	0	1
mix_22287_4	347	0	0	1	0	30	0	0
mix_22303_1	121.49	0	0	0	6	29	0	0
mix_22364_2	47	0	34	0	0	0	4	0
mix_22469_1	0	0	0	0	34	1	0	0
mix_2253_1	0	0	33	0	29	0	0	0
mix_22587_2	4078	0	0	0	0	17	2	0
mix_2278_1	0	0	0	0	3	0	8	0
mix_23411_1	0	0	21	0	0	0	0	11
mix_23673_1	0	0	29	0	6	0	0	0
mix_238_2	1514	0	0	6	1	0	0	0
mix_2409_1	316	0	0	8	0	29	0	0
mix_2413_1	37	0	0	7	0	0	2	0
mix_2462_1	0	0	0	0	36	0	12	0
mix_247_1	245	0	0	1	1	0	0	0
mix_24817_1	0	0	0	0	5	0	1	0
mix_2541_1	0	0	0	0	8	0	0	27
mix_2560_2	1610	0	0	0	1	39	0	0
mix_2646_5	30	0	1	0	1	0	0	0
mix_267_1	0	0	0	30	6	0	0	0
mix_2727_2	457	0	0	0	2	0	1	0
mix_2760_2	540	0	0	0	1	0	1	0
mix_2770_1	0	0	0	0	11	0	1	0
mix_2811_1	0	0	0	0	2	0	2	0
mix_2877_1	0	0	0	0	18	0	3	0
mix_2918_1	0	0	0	0	89	28	0	0
mix_2992_1	342	0	4	0	1	0	0	0
mix_3005_1	2205	0	0	0	1	0	0	1
mix_3005_4	999	0	0	0	1	0	1	0
mix_3021_2	192	0	16	0	0	0	1	0
mix_3068_1	0	0	15	0	4	0	0	0
mix_3069_1	405	0	0	0	4	0	0	17
mix_3091_1	0	0	0	6	0	0	2	0
mix_3151_1	424	0	9	14	0	0	0	0
mix_3176_2	0	0	0	0	32	17	0	0
mix_3178_1	0	0	0	20	9	0	0	0
mix_3186_5	239	0	0	0	8	0	0	1
mix_3219_4	39	0	0	0	1	0	0	8
mix_3269_1	0	0	0	0.5	0	0	0.5	0
mix_3270_1	0	0	0	0.5	0	0	0.5	0
mix_3296_6	474	0	0	0	1	9	0	0
mix_3318_1	726	0	0	13	2	0	0	0
mix_3328_1	0	0	0	0	0	1	1	0
mix_3333_1	0	0	49	0	21	0	0	0
mix_3333_3	2	0	16	0	30	0	0	0
mix_336_1	0	0	0	22	0	0	8	0
mix_3364_1	597	0	0	0	0	0	1	24
mix_3364_2	2097	0	0	0	0	41	2	0
mix_3364_3	268	0	0	0	1	0	0	1
mix_3383_1	4469	0	0	0	4	0	1	0
mix_3389_2	323	0	1	0	0	0	1	0
mix_3414_1	2506	0	0	0	1	0	0	1
mix_3414_2	1801	0	0	0	2	19	0	0
mix_3479_1	1814	0	0	0	1	1	0	0
mix_3486_3	453	0	0	0	0	1	1	0
mix_3491_1	153	0	0	1	1	0	0	0
mix_3495_1	563.8	0	0	0	1	0	1	0
mix_3536_4	291	0	0	0	1	0	1	0
mix_3537_3	176	0	1	0	1	0	0	0
mix_37_1	0	0	0	0	23	0	6	0
mix_3704_5	328	0	0	0	3	0	2	0
mix_3704_6	728	0	0	0	9	0	3	0
mix_3721_1	0	0	0	0	16	0	13	0
mix_3755_1	0	0	0	0	9	0	4	0
mix_3834_1	0	0	0	0	16	0	11	0
mix_3984_1	0	0	0	0	23.18	0	19	0
mix_3985_1	0	0	0	0	3	0	4	0
mix_4072_1	53	0	0	31	0	0	0	1
mix_4180_3	156	0	0	0	1	1	0	0
mix_420_1	0	0	0	0	23	0	0	15
mix_4209_1	619	0	0	0	1	6	0	0
mix_4278_1	341	0	0	0	1	0	0	24
mix_4284_1	62	0	0	0	1	26	0	0
mix_4285_1	0	0	0	0	11	0	4	0
mix_4286_3	730	0	0	0	1	0	0	1
mix_4347_1	0	0	0	0	4	0	5	0
mix_4353_1	128	0	0	0	0	0	2	9
mix_4375_1	0	0	0	0	5	0	10	0
mix_4395_3	834	0	0	0	2	0	0	2
mix_4396_7	1596	0	0	0	0	31	1	0
mix_4396_8	640	0	0	0	1	0	0	1
mix_440_1	158	0	0	0	0	19	1	0
mix_4412_1	0	0	0	0	68.01	0	25.56	0
mix_4438_3	298	0	0	0	6	20	0	0
mix_4470_1	0	0	0	0	4	0	2	0
mix_4517_1	0	0	0	0	21	12	0	0
mix_4524_2	0	0	0	0	0	0	43	34
mix_4600_1	782	0	0	0	0	0	1	6
mix_4682_1	215	0	0	0	14	0	1	0
mix_4705_1	0	0	9	0	0	24	0	0
mix_477_13	2857	0	0	0	0	0	2	1
mix_477_24	953	0	0	0	0	0	1	1
mix_477_26	5435	0	0	0	3	0	1	0
mix_4790_1	346	0	0	0	2	0	1	0
mix_4897_1	426	0	0	0	2	0	1	0
mix_4898_1	1834	0	0	0	0	1	0	28
mix_4898_2	158	0	7	0	0	0	1	0
mix_493_2	540	0	0	0	0	0	1	1
mix_4966_1	0	0	0	0	0	0	6	1
mix_5019_3	1425	0	0	32	0	0	0	1
mix_5019_6	469	0	0	0	1	0	1	0
mix_5088_1	0	0	0	0	0	0	2	2
mix_5126_1	0	0	0	0	0	0	9	16
mix_5202_1	0	0	0	0	0	0	13	13
mix_523_1	0	0	0	0	12	0	5	0
mix_5251_2	694	0	0	0	0	0	1	1
mix_5251_4	284	0	0	0	1	0	1	0
mix_5393_2	0	0	39	0	11	0	0	0
mix_542_1	0	0	0	0	11	23	0	0
mix_5490_2	140	0	1	17	0	0	0	0
mix_5511_1	0	0	0	0	9	33	0	0
mix_5514_1	0	0	23	0	0	25	0	0
mix_5619_1	0	0	0	0	18	15	0	0
mix_5665_1	0	0	0	0	3	0	24	0
mix_567_1	0	0	0	0	6	0	3	0
mix_5692_2	489	0	0	0	1	0	0	16
mix_5702_1	0	0	2	13	0	0	0	0
mix_5779_1	2537	0	0	0	1	0	5	0
mix_5780_2	541.16	0	0	1	1	0	0	0
mix_5790_2	932	0	12	0	1	0	0	0
mix_5804_3	374	0	0	0	0	31	1	0
mix_6011_2	0	0	0	9	22	0	0	0
mix_6012_2	0	0	12	0	18	0	0	0
mix_6074_1	0	0	0	0	6	0	0	18
mix_6101_6	260	0	0	0	1	16	0	0
mix_6142_1	458	0	0	1	1	0	0	0
mix_618_1	0	0	0	0	25	0	0	18
mix_6247_2	550	0	0	0	0	17	0	1
mix_631_2	385	0	0	0	10	0	7	0
mix_6374_15	895	0	16	0	0	0	0	1
mix_6425_3	0	0	0	14	13	0	0	0
mix_6425_4	0	0	42	0	22	0	0	0
mix_6425_5	0	0	0	0	6	0	6	0
mix_6572_1	0	0	0	14	6	0	0	0
mix_676_1	0	0	0	13	0	22	0	0
mix_680_1	0	0	0	0	1	0	2	0
mix_681_3	176	0	0	0	0	12	2	0
mix_702_2	546	0	0	0	1	0	1	0
mix_716_1	536	0	1	0	1	0	0	0
mix_717_1	1196	0	0	0	11	0	1	0
mix_7212_2	1663	0	0	1	0	1	0	0
mix_7439_2	0	0	0	0	2	0	0	1
mix_7542_1	0	0	0	0	7	0	31	0
mix_7671_1	0	0	0	0	0	8	0	17
mix_7743_4	0	0	10	0	0	0	11	0
mix_7932_1	0	0	0	0	9	0	1	0
mix_8106_1	380	0	0	0	1	0	1	0
mix_8118_1	0	0	26	0	15	0	0	0
mix_814_1	249	0	0	8	0	0	0	1
mix_8228_1	1032	0	0	0	1	20	0	0
mix_8253_1	726	0	0	10	0	0	1	0
mix_8280_1	543	0	0	0	1	0	2	0
mix_8424_2	516	0	0	0	0	0	1	1
mix_8599_1	0	0	0	0	6	0	10	0
mix_8743_1	0	0	19	0	0	0	9	0
mix_877_1	0	0	0	0	22	0	3	0
mix_9009_1	423	0	0	0	1	21	0	0
mix_9056_1	0	0	41	0	6	0	0	0
mix_915_1	0	0	0	0	8	0	3	0
mix_9478_1	0	0	26	0	1	0	0	0
mix_9540_1	0	0	26	0	5	0	0	0
mix_989_2	260	0	1	0	0	0	0	1
mix_9969_1	0	0	0	0	0	0	7	13
mix_997_3	906	0	0	0	1	9	0	0
mix_10256_1	1759	0	0	0	1	11	2	0
mix_10595_1	0	0	21	0	13	0	10	0
mix_1087_2	1851	0	0	13	1	0	5	0
mix_1097_8	3474	0	23	0	3	0	0	1
mix_1124_1	0	0	8	0	8	0	1	0
mix_1209_1	0	0	17	10	12	0	0	0
mix_13486_1	731	0	12	0	3	0	1	0
mix_15363_1	0	0	27	0	24	0	7	0
mix_1566_1	0	0	0	0	9	0	12	23
mix_16518_1	1631	0	1	1	0	9	0	0
mix_1727_3	992	0	0	0	0	13	2	21
mix_17504_1	1	0	14	0	0	0	2	17
mix_1763_3	1008	0	1	13	0	0	2	0
mix_1991_1	4346	0	0	0	0	8	3	2
mix_2002_1	1522	0	0	0	6	8	0	15
mix_2074_2	3220	0	11	0	2	0	0	1
mix_2075_2	3279	0	0	1	0	45	2	0
mix_21997_3	2916	0	0	1	0	0	1	2
mix_22015_3	437	0	1	1	0	21	0	0
mix_22028_1	2265	0	0	0	2	0	3	1
mix_2262_1	0	0	0	0	12	0	55	43
mix_2327_1	471	0	1	7	1	0	0	0
mix_2343_1	0	0	0	0	4	0	5	13
mix_23692_1	0	0	0	0	6	0	18	10
mix_2404_2	1099	0	0	0	1	12	0	1
mix_244_1	0	0	13	0	13	0	6	0
mix_2514_1	620	0	0	0	1	43	1	0
mix_2560_3	1872	0	0	0	7	0	1	1
mix_2584_1	0	0	0	0	7	0	7	3
mix_2727_4	3928	0	0	0	0	21	1	19
mix_3009_2	3960	0	2	0	3	0	1	0
mix_3009_8	2859	0	0	19	0	28	6	0
mix_3149_4	1007	0	0	0	1	27	2	0
mix_3163_1	1486	0	0	0	0	15	1	1
mix_3183_1	0	0	0	0	6	0	1	10
mix_3186_2	3706	0	0	0	0	54	1	1
mix_3235_1	3455	0	0	0	0	39	3	1
mix_3486_2	3525	0	0	0	2	0	1	2
mix_3555_1	881	0	7	0	0	0	4	1
mix_3611_1	306	0	1	0	0	17	0	1
mix_373_1	0	0	3	0	21	0	3	0
mix_3818_1	0	0	0	0	38	0	41	6
mix_3861_1	1695	0	0	0	3	1	1	0
mix_3876_1	0	0	9	0	63	0	0	11
mix_3878_1	0	0	0	0	5	0	9	8
mix_3936_1	0	0	0	1	17	0	5	0
mix_4196_1	0	0	0	11	0	24	0	24
mix_4382_1	0	0	0	0	7	0	52	12
mix_4411_1	0	0	0	0	24.99	0	21.44	1
mix_4518_2	0	0	12	0	40	0	0	15
mix_4757_1	0	0	7	0	22	0	4	0
mix_477_16	759	0	0	0	1	57	1	0
mix_477_19	2063	0	0	0	1	0	1	1
mix_477_4	627	0	0	1	1	0	0	1
mix_5248_2	1705	0	0	0	6	12	1	0
mix_5251_8	274	0	0	0	0	6	1	30
mix_5454_1	0	0	0	0	13	0	6	5
mix_5525_2	0	0	0	0	2	4	19	0
mix_5652_1	0	0	0	16	14	11	0	0
mix_6067_1	0	0	0	41	0	0	5	19
mix_6075_1	0	0	0	19	26	29	0	0
mix_6101_5	192	0	0	0	1	30	1	0
mix_6153_2	534	0	1	0	1	0	1	0
mix_6245_14	1865	0	0	9	1	0	1	0
mix_6245_6	3504	0	2	0	0	29	0	1
mix_6245_8	1160	0	0	0	0	32	5	1
mix_6374_18	1216	0	0	0	1	29	1	0
mix_6550_1	0	0	0	0	10	0	2	1
mix_679_3	5223	0	0	0	2	28	1	0
mix_760_1	0	0	25	0	20	0	3	0
mix_7768_1	0	0	10	0	8	5	0	0
mix_778_2	618	0	0	0	1	17	1	0
mix_7973_1	0	0	9	0	5	11	0	0
mix_8092_1	0	0	13	0	14	32	0	0
mix_8169_4	2162	0	15	0	0	26	0	22
mix_8180_5	1526	0	0	0	2	0	2	1
mix_8763_2	424	0	0	0	1	10	1	0
mix_8770_1	0	0	35	0	3	0	5	0
mix_9877_1	0	0	0	0	25	0	12	8
mix_10383_2	5314	0	0	0	1	40	1	1
mix_1097_6	2077	0	0	0	1	21	2	1
mix_16205_2	829	0	0	0	3	33	1	1
mix_16228_2	953	0	1	0	1	0	2	1
mix_1628_1	0	0	0	0	41	3	103	45
mix_1651_1	509	0	0	0	1	14	1	2
mix_18983_1	1501	0	0	1	1	17	1	0
mix_18988_1	3341	0	1	0	2	42	1	0
mix_1991_5	977	0	0	9	1	41	2	0
mix_2002_2	8012	0	0	0	1	38	4	1
mix_2077_4	2049	0	0	0	2	13	1	1
mix_2390_1	0	0	0	141.27	7	35	1.01	0
mix_271_1	2912	0	3	0	3	0	1	1
mix_2836_1	0	0	30	0	27	0	1	10
mix_2867_1	1	0	32	0	32	24	4	0
mix_3280_2	701	0	21	0	1	17	3	0
mix_3485_2	7163	0	0	1	2	0	2	1
mix_3555_4	2464	0	0	0	1	63	4	21
mix_4396_14	1653	0	1	0	1	0	1	1
mix_4642_1	0	0	7	17	94	0	11	0
mix_4685_1	0	0	21	14	6	0	0	12
mix_477_17	2779	0	0	0	5	21	1	1
mix_477_8	7481	0	0	0	3	14	3	3
mix_4983_1	0	0	0	2	5	0	7	3
mix_5067_1	0	0	8	11	0	13	6	0
mix_5209_1	3818	0	0	0	5	1	1	1
mix_5257_1	0	0	3	0	42	38	6	0
mix_5491_1	0	0	41	5	84	45	0	0
mix_5661_1	0	0	7	23	1	0	0	9
mix_6542_1	0	0	0	2	15	0	13	15
mix_6617_1	0	0	0	14	8	15	13	0
mix_6823_1	0	0	0	16	10	14	3	0
mix_7868_1	0	0	8	0	4	0	3	9
mix_1097_11	4899	0	1	1	1	0	2	1
mix_1097_12	2507	0	0	1	8	16	9	1
mix_1809_3	7350	0	2	0	3	87	3	3
mix_19194_3	6194	0	1	0	1	59	2	6
mix_1991_4	5300	0	1	7	3	43	2	0
mix_23360_1	0	0	28	0	40	25	3	15
mix_2727_7	6170	0	0	1	2	72	3	1
mix_3125_1	1	0	0	56	3	103	4	16
mix_3129_1	1	0	10	21	6	0	1	29
mix_3562_3	2770	0	0	1	2	28	1	11
mix_4172_2	3604	0	7	0	3	16	1	2
mix_477_14	3394	0	0	1	1	59	3	1
mix_477_5	5026	0	1	0	3	1	3	3
mix_5366_2	0	0	32	0	27	13	15	12
mix_5394_3	0	0	29	17	70	18	9	0
mix_5445_1	0	0	9	12	34	0	5	30
mix_5560_1	0	0	0	2	79	1	111	21
mix_5667_1	0	0	28	0	37	20	3	19
mix_7408_1	0	0	10	70	10	92	0	15
mix_7633_1	0	0	0	74	3040	58	3691	570
mix_7942_1	0	0	0	50	1337	16	1901	413
mix_923_1	3461	0	9	17	0	2	2	1
mix_1097_13	5487	0	1	2	4	1	1	1
mix_18988_3	3618	0	11	5	8	20	2	1
mix_22015_2	10874	0	1	1	1	57	3	2
mix_2785_1	0	0	25	78	6	32	6	27
mix_4729_1	0	0	24	8	1	24	17	2
mix_6436_1	0	0	62	91	36	105	24	116
mix_6552_1	0	0	25	347	8339	112	10250	2823
mix_6815_14	9425	0	1	1	5	50	7	16
mix_7632_1	0	0	2	2	16714	336	14987	2748

## Sheet: Supplementary Table S4
Supplementary Table S4 The shared genes between cecal content samples and negative control in metatranscriptomic dataset
gene id	P	N	C1	C2	C3	C4	C5	C6
mix_1154_1	113	1	0	0	0	0	1	0
mix_16395_3	401	1	0	0	0	0	1	0
mix_16594_1	1581.74	1	0	0	0	0	0	1
mix_271_2	866	1	0	0	1	0	0	0
mix_5110_6	778	1	0	0	0	0	2	0
mix_6815_4	797	1	0	0	1	0	0	0
mix_13283_2	2076	1	0	0	0	33	0	1
mix_1727_1	1070	1	0	0	1	0	0	4
mix_3202_1	0	1	0	0	23	0	25	0
mix_16220_1	1259	1	0	1	2	0	1	0
mix_16411_2	2994	1	1	0	0	0	4	1
mix_3009_1	3878	1	0	1	3	0	0	2
mix_3555_2	611	1	0	0	1	33	1	0
mix_4172_8	3222	1	0	1	0	0	3	2
mix_477_11	1452	1	0	1	0	19	0	4
mix_8169_5	3171	1	0	0	1	0	2	1
mix_8170_2	2458	1	0	0	2	1	2	0
mix_16264_2	3045	1	1	0	3	10	3	0
mix_477_2	2646	1	0	0	1	12	1	1
mix_13207_4	11	1	6	13	10	1	14	12
mix_4545_1	0	1	0	0	0	0	0	9
mix_5490_3	266	2	0	0	0	0	2	0
mix_22015_5	1368	2	1	0	1	0	0	0
mix_477_9	1886	2	0	0	6	0	0	1
mix_1077_1	147	3	0	0	2	0	0	0
mix_8295_2	113	3	0	0	3	0	0	0
mix_5790_5	486	4	0	0	0	0	0	2
mix_19398_2	3512	4	0	0	3	0	2	0
mix_6245_12	2583	4	1	0	0	0	2	0
mix_108_1	217	5	0	0	0	0	0	1
mix_3557_3	795	5	0	0	2	0	1	0
mix_3590_1	788	6	0	16	0	0	0	0
mix_4691_1	0	6	20	0	0	0	0	0
mix_13422_4	1436	6	0	0	1	16	0	1
mix_5378_1	0	6	30	0	97	0	8	42
mix_6790_1	0	6	13	26	0	0	4	10
mix_1002_2	12191	6	1	2	14	76	3	0
mix_13489_2	543	7	0	0	0	21	0	0
mix_18983_2	484	7	0	0	0	1	0	0
mix_10280_2	1641	7	1	1	0	17	0	1
mix_16053_2	7871	7	0	2	2	59	5	4
mix_3945_2	331	8	0	0	0	0	1	0
mix_4701_1	1	8	0	0	8	0	0	0
mix_6815_9	739	8	1	0	0	0	0	0
mix_19565_1	3323	8	0	0	1	0	1	2
mix_3397_1	0	8	28	0	11	0	0	5
mix_4853_1	2835	8	1	0	2	0	2	2
mix_5073_1	0	8	0	1	24	30	0	29
mix_17557_1	5	9	0	0	1	0	0	0
mix_2239_2	139	9	0	0	1	0	0	0
mix_2463_1	0	9	0	0	10	0	0	0
mix_5019_2	7968	9	0	0	3	36	6	0
mix_3583_2	2812	9	2	0	12	19	1	0
mix_8295_1	7754	9	1	4	3	1	1	1
mix_3495_2	424	10	0	0	0	0	1	0
mix_3612_1	160	10	0	0	1	0	0	0
mix_4603_2	646	10	0	0	0	0	0	1
mix_6374_11	423	10	0	29	0	26	1	0
mix_681_2	4616	10	2	0	2	0	3	2
mix_477_27	34955	10	4	1	11	146	15	10
mix_4513_1	0	11	17	0	32	0	0	0
mix_8070_1	0	11	16	0	0	0	3	0
mix_3704_1	944	12	0	0	0	0	0	1
mix_4003_2	396	12	0	0	0	0	1	0
mix_5251_12	871	12	0	0	0	0	0	1
mix_5478_1	0	12	0	0	2	0	0	0
mix_2050_1	2045	12	1	0	0	24	2	1
mix_3284_1	1	12	202	31	215	74	17	37
mix_5968_2	0	12	20	11	20	10	2	5
mix_980_4	8032	12	2	2	1	44	3	1
mix_1097_9	3471	13	0	0	0	0	1	0
mix_1726_1	550	13	0	0	0	0	1	0
mix_22047_3	743	13	0	0	0	0	1	0
mix_3562_6	877	13	0	0	1	0	0	0
mix_681_1	229	13	0	0	1	0	0	0
mix_19065_4	1242	13	0	0	1	0	0	3
mix_2057_1	827	13	0	0	0	17	2	0
mix_22015_4	3475	13	0	0	1	0	2	0
mix_16052_1	1289	13	0	1	2	0	1	0
mix_2450_1	1302	13	1	17	0	0	1	0
mix_1842_2	3885	13	24	0	1	29	2	0
mix_477_12	9388	13	0	2	3	38	4	1
mix_19225_1	480	14	0	0	0	0	1	0
mix_22385_1	504	14	0	0	1	0	0	0
mix_6815_5	2137	14	0	1	0	0	3	0
mix_4709_1	0	14	8	0	50	0	1	9
mix_4391_2	497	15	0	0	1	0	0	0
mix_5526_1	0	15	0	0	0	0	0	23
mix_3562_2	2428	15	0	0	2	0	2	1
mix_10436_1	8520	15	0	1	4	17	1	5
mix_16052_3	7985	15	1	1	2	63	3	0
mix_10398_2	333	16	0	0	3	0	0	0
mix_980_1	748	16	0	0	1	0	0	0
mix_7496_1	0	16	31	0	15	0	0	0
mix_4527_1	0	16	9	0	0	9	0	8
mix_477_21	6103	16	1	0	7	0	6	0
mix_6815_10	8044	16	0	0	5	42	3	20
mix_7782_1	0	16	0	11	1	36	7	0
mix_480_1	0	17	20	0	0	0	0	0
mix_16113_1	837	17	0	0	0	27	1	0
mix_5281_1	0	17	22	46	0	0	4	18
mix_5830_3	953	17	1	20	3	42	0	0
mix_7421_1	0	17	11	99	4	51	2	8
mix_2327_2	306	18	0	0	1	0	0	0
mix_2492_1	212	18	0	0	0	0	5	0
mix_3489_1	350	18	0	0	0	8	0	0
mix_5399_1	981	18	37	0	1	0	7	0
mix_5790_6	929	19	0	0	1	0	0	0
mix_7178_1	1031	19	1	0	0	0	0	0
mix_995_1	154	19	0	6	0	0	0	0
mix_4172_7	1787	19	1	0	1	0	0	0
mix_5194_1	0	19	0	0	4	0	0	16
mix_3112_2	1	19	0	14	40	0	8	0
mix_10260_1	9295	19	3	0	7	90	2	2
mix_1097_10	5612	19	4	1	2	21	3	0
mix_2989_1	1456	20	0	0	0	0	1	0
mix_7778_1	0	20	0	42	0	0	1	0
mix_5787_3	5335	20	1	0	2	32	1	2
mix_2357_1	16205	20	2	1	7	338	3	1
mix_6815_15	11443	20	20	21	8	70	9	3
mix_3149_1	799	21	0	1	1	0	0	0
mix_6141_5	1901	21	0	0	1	20	1	0
mix_1991_2	1490	21	0	0	1	29	1	26
mix_3186_9	5245	21	0	1	3	53	2	1
mix_3218_1	1119	22	0	0	5	0	0	0
mix_8011_1	1044	22	0	0	0	0	0	1
mix_3318_4	902	22	0	0	2	0	0	1
mix_271_3	2234	22	0	0	2	2	3	0
mix_3006_1	0	22	22	0	17	0	5	0
mix_10596_1	266	23	0	0	1	0	0	8
mix_2071_1	0	23	41	0	24	32	0	0
mix_477_15	1065	23	0	24	1	38	0	0
mix_5366_3	0	24	82	0	112	0	23	0
mix_3783_2	2560	24	2	1	2	0	1	0
mix_477_25	4113	24	0	0	1	42	3	1
mix_2860_1	0	24	15	29	7	0	5	8
mix_3186_8	2099.26	25	0	0	2	0	1	0
mix_3704_2	2876	25	0	2	1	66	3	0
mix_6374_16	10844	25	2	2	3	72	5	3
mix_60_1	1749	26	0	0	0	0	3	0
mix_4169_2	0	26	29	0	35	0	0	0
mix_22101_2	2356	26	0	1	0	26	0	1
mix_5426_1	0	26	0	7	0	20	9	0
mix_10455_3	8749	26	1	0	3	34	3	0
mix_3043_1	0	27	13	25	0	0	0	0
mix_922_1	790	27	0	0	1	0	1	0
mix_7805_1	0	27	0	65	1	79	0	0
mix_13292_1	2327	27	0	22	2	0	3	1
mix_6260_1	0	27	11	79	20	101	26	48
mix_6340_1	0	28	0	0	0	36	0	0
mix_2077_3	1561	28	0	1	0	14	0	0
mix_4548_1	1	28	0	29	9	47	5	0
mix_6245_10	2122	28	2	0	1	0	1	2
mix_6372_1	2	29	0	2	19	20	14	1
mix_83_1	5080	29	1	0	2	37	1	2
mix_8368_1	732	30	0	0	0	0	1	0
mix_3873_2	3287	30	0	0	0	0	5	2
mix_3009_9	2207	30	0	0	11	27	1	0
mix_4172_6	554	31	0	0	0	0	0	1
mix_679_4	3450	31	0	1	1	0	1	0
mix_2560_4	2912	32	0	1	0	1	3	0
mix_4395_6	1939	32	15	1	0	0	1	0
mix_4970_1	0	32	34	25	118	0	0	5
mix_3296_2	329	33	10	0	0	0	0	0
mix_18988_2	14627	33	3	1	7	185	5	3
mix_8088_1	550	34	0	0	0	1	0	0
mix_5257_2	0	34	223	28	235	88	18	0
mix_3699_1	0	35	0	0	0	0	3	0
mix_16035_3	1737	35	0	0	0	20	1	1
mix_2166_4	5374	35	15	0	2	90	3	18
mix_13479_1	1118	36	0	0	0	33	0	0
mix_2050_2	1842	36	0	0	0	0	0	1
mix_5743_1	1	36	25	0	53	52	4	0
mix_10383_1	7899	36	2	0	3	53	4	1
mix_16046_1	6185	36	1	1	2	78	1	4
mix_16047_2	15666	37	2	0	10	140	6	5
mix_4728_2	1324	38	0	0	0	0	0	1
mix_10257_2	12913	38	1	1	17	135	4	4
mix_13887_1	1359	39	0	0	0	40	1	0
mix_3186_7	7244	39	0	0	6	21	6	3
mix_4018_1	148	42	0	0	0	0	0	1
mix_477_28	2929	42	0	0	1	0	1	0
mix_14171_1	476	43	0	0	0	0	0	1
mix_5654_1	0	43	0	18	11	0	0	0
mix_2496_1	303	45	0	0	0	0	1	0
mix_16052_4	5234	45	1	0	2	44	1	0
mix_6815_6	32262	46	30	11	19	140	16	3
mix_8220_3	1676	48	0	0	2	0	1	0
mix_1583_1	0	48	209	52	151	66	6	36
mix_7662_1	0	50	1	43	0	21	8	8
mix_5444_1	0	51	0	0	12	0	3	0
mix_22188_1	9290	51	1	15	6	27	9	2
mix_7475_1	0	52	27	12	19	0	0	13
mix_4172_5	15869	54	0	2	8	32	5	0
mix_4725_1	0	56	0	223	47	55	15	47
mix_7971_1	0	59	15	26	18	0	0	0
mix_3308_1	1	60	0	9	7	144	0	0
mix_6815_7	23226	60	10	0	29	142	5	2
mix_10336_1	11223	62	1	0	4	74	3	2
mix_4779_1	0	62	21	0	19.57	77.03	6	7
mix_7158_1	0	63	0	0	0	35	1	0
mix_3009_13	8186	64	2	0	4	65	6	1
mix_6815_12	30534	64	2	2	20	72	14	4
mix_6815_11	47588	66	5	3	20	205	23	9
mix_4172_3	10861	67	0	26	8	45	5	0
mix_7319_2	754	70	23	36	38	30	8	31
mix_7316_1	0	72	52	1	14	58	9	44
mix_6252_1	0	75	41	44	42	0	29	32
mix_4328_1	0	77	61	30	30	73	17	0
mix_5609_1	0	78	90	1532.21	85	51.74	29	87
mix_477_22	33465	89	1	2	15	109	20	8
mix_5267_1	0	104	17	48	9	30	14	28
mix_4544_1	0	164.35	36.21	44.85	17.73	1	3.12	46.19
mix_6461_1	0	170	0	37	9	0	0	10
mix_13207_5	392	170	265	745	948	161	1108	653
mix_6815_13	16202	170	3	4	5	25	9	5
mix_5341_1	0	178	31	243.73	64	14	18.99	35
mix_7777_1	0	193	0	0	0	0	1	0
mix_7416_1	0	258	54	123	57	144	26	91
mix_4478_1	1	290	26	227	111	198	37	115
mix_7923_1	0	358	183	218	73	208	75	138
mix_6882_1	1	364	86	73	146	84	13	93
mix_6879_1	4	372	212	366	293	533	109	305
mix_13207_8	1110	388	716	2120	2310	353	2924	1685
mix_4543_1	0	395.18	93.66	53	44.39	140.54	13.62	30.11
mix_7562_1	0	470	59	113	63	90	32	119
mix_6885_1	1	582.08	103	284.79	92	24.26	26	8
mix_13207_2	1406	599	1102	2613	3331	548	4129	2269
mix_7798_1	1.78	736.33	177.67	300.71	176.21	320.45	96.94	122.23
mix_7974_1	6	1429	1310	1263	869	1402	349	1111
mix_5571_1	3	1505.99	575	643	262	617.02	133	248
mix_13207_3	3485	1508	2550	6643	7820	1320	10071	5681
mix_13207_7	4058	1717	2905	7666	8999	1510	11724	6531
mix_4547_1	0	1900.85	577	705	225.09	606	234	380
mix_4542_1	0	1907.86	607.08	496.95	346.55	604.57	220.2	376.85
mix_7428_1	0	2624	994	1178	676	1051	265	581
mix_2434_1	4.34	3384.06	1482.34	1215.83	969.9	1343.52	444.04	772.44
mix_7743_7	16	4137	3252	3055	2443	3711	1011	2917
mix_5567_1	4	5244.01	1726	2226	1179	2206.98	535	785
mix_22010_1	5.66	5316.94	3319.66	3006.17	1689.1	3986.48	836.96	2048.56
mix_3810_1	2	6693	3147	3706	1934	3691	1198	2563
mix_7975_2	10	13168	9717	10651	6120	13634	2495	7596
mix_7803_1	10.22	14454.6	6304.37	6520.49	3737.03	7043.43	2058.13	4514.55
mix_1038_1	64	40790	31545	32000	17898	42987	8429	22649
mix_1061_1	81	49465	36534	39392	24210	47992	10744	30597

## Sheet: Supplementary Table S5
Supplementary Table S5 Gut microbial metagenomic reference gene catalog
gene id	N	C1	C2	C3	C4	C5	C6
k141_1000_1	0	0	0	0	2	0	0
k141_100006_1	0	0	0	0	2	0	0
k141_100011_1	0	0	0	0	0	2	0
k141_100027_2	0	0	4	0	0	0	0
k141_100040_1	0	2	0	0	0	0	0
k141_100051_2	0	0	2	0	0	0	0
k141_100142_2	0	0	22	0	0	0	0
k141_100143_1	0	0	8	0	0	0	0
k141_100153_2	0	0	16	0	0	0	0
k141_100162_1	0	0	18	0	0	0	0
k141_100203_3	0	0	0	2	0	0	0
k141_10023_1	0	0	8	0	0	0	0
k141_100242_1	0	0	0	4	0	0	0
k141_100266_1	0	0	0	0	4	0	0
k141_100282_1	0	0	2	0	0	0	0
k141_100282_2	0	0	10	0	0	0	0
k141_100297_2	0	0	8	0	0	0	0
k141_100297_3	0	0	4	0	0	0	0
k141_100318_1	0	0	26	0	0	0	0
k141_10032_3	0	0	2	0	0	0	0
k141_100335_1	0	0	12	0	0	0	0
k141_100381_1	0	0	0	0	0	2	0
k141_100410_1	0	0	14	0	0	0	0
k141_100438_1	0	0	6	0	0	0	0
k141_100443_2	0	0	0	4	0	0	0
k141_100448_1	0	0	22	0	0	0	0
k141_100448_2	0	0	2	0	0	0	0
k141_100458_1	0	0	0	2	0	0	0
k141_100469_1	0	0	0	0	2	0	0
k141_100504_2	0	0	12	0	0	0	0
k141_100506_1	0	0	16	0	0	0	0
k141_100519_1	0	0	0	0	2	0	0
k141_10053_1	0	0	4	0	0	0	0
k141_10053_2	0	0	2	0	0	0	0
k141_100535_1	0	0	6	0	0	0	0
k141_100573_1	0	0	32	0	0	0	0
k141_100585_1	0	2	0	0	0	0	0
k141_100629_1	0	0	0	0	2	0	0
k141_100637_1	0	0	0	0	0	2	0
k141_100646_1	0	0	4	0	0	0	0
k141_100648_3	0	0	12	0	0	0	0
k141_100649_1	0	6	0	0	0	0	0
k141_100687_1	0	0	0	0	2	0	0
k141_100692_2	0	0	0	2	0	0	0
k141_100693_1	0	0	0	0	0	4	0
k141_100699_1	0	0	14	0	0	0	0
k141_100699_2	0	0	8	0	0	0	0
k141_10071_1	0	0	0	0	2	0	0
k141_100749_1	0	0	0	0	4	0	0
k141_100753_1	0	0	14	0	0	0	0
k141_100753_2	0	0	4	0	0	0	0
k141_100758_2	0	0	6	0	0	0	0
k141_100777_2	0	0	0	0	0	4	0
k141_100800_1	0	0	2	0	0	0	0
k141_100804_1	0	0	34	0	0	0	0
k141_100807_2	0	0	2	0	0	0	0
k141_100815_1	0	0	34	0	0	0	0
k141_100830_1	0	0	6	0	0	0	0
k141_10084_2	0	0	10	0	0	0	0
k141_100844_1	0	0	6	0	0	0	0
k141_100847_3	0	0	0	0	2	0	0
k141_100849_1	0	0	0	0	0	2	0
k141_100877_1	0	0	4	0	0	0	0
k141_100897_1	0	0	22	0	0	0	0
k141_100899_1	0	0	0	0	0	2	0
k141_100902_1	0	0	16	0	0	0	0
k141_100945_1	0	0	8	0	0	0	0
k141_100964_1	0	0	16	0	0	0	0
k141_100978_1	0	0	0	0	2	0	0
k141_101010_1	0	0	14	0	0	0	0
k141_101047_1	0	0	26	0	0	0	0
k141_101047_2	0	0	6	0	0	0	0
k141_101055_1	0	0	0	0	2	0	0
k141_101059_1	0	0	14	0	0	0	0
k141_101060_1	0	0	0	2	0	0	0
k141_101090_1	0	0	0	2	0	0	0
k141_101093_1	0	0	2	0	0	0	0
k141_1011_1	0	0	0	0	0	2	0
k141_101108_1	0	0	18	0	0	0	0
k141_101144_1	0	0	0	0	2	0	0
k141_101172_1	0	0	2	0	0	0	0
k141_101178_1	0	0	0	0	2	0	0
k141_101222_1	0	2	0	0	0	0	0
k141_101222_3	0	2	0	0	0	0	0
k141_101222_4	0	0	0	0	2	0	0
k141_101237_1	0	0	12	0	0	0	0
k141_101242_1	0	2	0	0	0	0	0
k141_101276_1	0	0	0	4	0	0	0
k141_10128_1	0	2	0	0	0	0	0
k141_101291_2	0	0	0	0	2	0	0
k141_101320_1	0	0	6	0	0	0	0
k141_101320_2	0	0	2	0	0	0	0
k141_101320_3	0	0	4	0	0	0	0
k141_101332_2	0	0	0	0	0	0	2
k141_101353_2	0	0	0	0	0	2	0
k141_101377_1	0	0	4	0	0	0	0
k141_101388_1	0	0	0	2	0	0	0
k141_101392_1	0	0	0	4	0	0	0
k141_101411_1	0	0	12	0	0	0	0
k141_101413_1	0	0	16	0	0	0	0
k141_101435_1	0	0	0	0	2	0	0
k141_101441_1	0	0	14	0	0	0	0
k141_101459_1	0	0	8	0	0	0	0
k141_101464_1	0	0	22	0	0	0	0
k141_101468_1	0	0	0	0	0	0	4
k141_101475_1	0	0	2	0	0	0	0
k141_101496_1	0	0	2	0	0	0	0
k141_10151_1	0	0	4	0	0	0	0
k141_101516_2	0	0	0	0	0	2	0
k141_101519_2	0	0	16	0	0	0	0
k141_101526_1	0	0	10	0	0	0	0
k141_101554_1	0	0	0	0	0	0	2
k141_101562_2	0	0	0	0	2	0	0
k141_101575_19	0	0	2	0	0	0	0
k141_101575_27	0	0	0	2	0	0	0
k141_101575_29	0	0	8	0	0	0	0
k141_101575_32	0	0	2	0	0	0	0
k141_101578_1	0	0	6	0	0	0	0
k141_101613_1	0	0	26	0	0	0	0
k141_101627_1	0	2	0	0	0	0	0
k141_101631_1	0	0	0	0	2	0	0
k141_101645_1	0	0	20	0	0	0	0
k141_101646_1	0	0	0	0	0	0	4
k141_101667_1	0	0	2	0	0	0	0
k141_101692_1	0	0	16	0	0	0	0
k141_101702_1	0	0	30	0	0	0	0
k141_101704_1	0	0	26	0	0	0	0
k141_101704_2	0	0	20	0	0	0	0
k141_101711_1	0	0	2	0	0	0	0
k141_101727_1	0	0	12	0	0	0	0
k141_101729_1	0	8	0	0	0	0	0
k141_101729_2	0	0	0	4	0	0	0
k141_101736_1	0	0	18	0	0	0	0
k141_101739_2	0	0	0	2	0	0	0
k141_101744_1	0	0	10	0	0	0	0
k141_101777_2	0	0	16	0	0	0	0
k141_101792_1	0	0	14	0	0	0	0
k141_101808_2	0	0	2	0	0	0	0
k141_101816_1	0	0	0	0	2	0	0
k141_10182_1	0	4	0	0	0	0	0
k141_101874_1	0	0	2	0	0	0	0
k141_101874_2	0	0	16	0	0	0	0
k141_10191_1	0	0	0	2	0	0	0
k141_101927_2	0	0	22	0	0	0	0
k141_101954_1	0	0	6	0	0	0	0
k141_101964_1	0	0	20	0	0	0	0
k141_101966_1	0	0	0	0	0	2	0
k141_101995_1	0	0	40	0	0	0	0
k141_102005_1	0	2	0	0	0	0	0
k141_102032_1	0	0	0	6	0	0	0
k141_102068_1	0	0	6	0	0	0	0
k141_102072_1	0	0	24	0	0	0	0
k141_102075_3	0	0	0	0	0	2	0
k141_10208_1	0	0	0	2	0	0	0
k141_10208_2	0	2	0	0	0	0	0
k141_102081_1	0	0	0	2	0	0	0
k141_102082_1	0	0	6	0	0	0	0
k141_102108_2	0	0	0	0	0	0	2
k141_102112_1	0	0	2	0	0	0	0
k141_102118_1	0	0	12	0	0	0	0
k141_102138_2	0	0	22	0	0	0	0
k141_102139_1	0	0	0	0	2	0	0
k141_102159_2	0	0	0	0	2	0	0
k141_102203_2	0	0	8	0	0	0	0
k141_102206_1	0	0	6	0	0	0	0
k141_102206_3	0	0	30	0	0	0	0
k141_102216_1	0	0	10	0	0	0	0
k141_102218_2	0	0	26	0	0	0	0
k141_102264_1	0	0	12	0	0	0	0
k141_102291_1	0	0	0	0	4	0	0
k141_102304_1	0	0	2	0	0	0	0
k141_102319_1	0	0	0	0	0	0	4
k141_102335_2	0	0	0	0	0	2	0
k141_102343_1	0	0	2	0	0	0	0
k141_102345_1	0	0	2	0	0	0	0
k141_102355_1	0	0	2	0	0	0	0
k141_10239_1	0	4	0	0	0	0	0
k141_102424_1	0	0	28	0	0	0	0
k141_102454_1	0	0	0	0	2	0	0
k141_102523_1	0	0	8	0	0	0	0
k141_102538_1	0	0	12	0	0	0	0
k141_102541_1	0	0	4	0	0	0	0
k141_102541_2	0	0	2	0	0	0	0
k141_102560_1	0	0	0	0	0	2	0
k141_102578_1	0	0	0	0	2	0	0
k141_102589_2	0	0	18	0	0	0	0
k141_102592_1	0	0	0	2	0	0	0
k141_102599_1	0	0	4	0	0	0	0
k141_102599_3	0	0	14	0	0	0	0
k141_102599_4	0	0	12	0	0	0	0
k141_102608_1	0	0	26	0	0	0	0
k141_102618_1	0	0	20	0	0	0	0
k141_102642_1	0	0	4	0	0	0	0
k141_102642_2	0	0	18	0	0	0	0
k141_102645_1	0	0	34	0	0	0	0
k141_102668_2	0	0	0	2	0	0	0
k141_102687_2	0	0	2	0	0	0	0
k141_102689_2	0	0	0	0	2	0	0
k141_10269_2	0	0	74	0	0	0	0
k141_102699_1	0	0	24	0	0	0	0
k141_102711_2	0	0	20	0	0	0	0
k141_102721_1	0	0	30	0	0	0	0
k141_102730_1	0	0	6	0	0	0	0
k141_102747_1	0	0	0	0	4	0	0
k141_102755_2	0	0	28	0	0	0	0
k141_102774_2	0	0	4	0	0	0	0
k141_102789_1	0	0	0	2	0	0	0
k141_10283_1	0	0	4	0	0	0	0
k141_102854_1	0	4	0	0	0	0	0
k141_102863_1	0	0	0	0	0	2	0
k141_1029_1	0	0	4	0	0	0	0
k141_102909_2	0	0	6	0	0	0	0
k141_10291_1	0	0	14	0	0	0	0
k141_10291_2	0	0	4	0	0	0	0
k141_102956_1	0	0	0	2	0	0	0
k141_102978_1	0	0	6	0	0	0	0
k141_102981_2	0	0	0	0	0	2	0
k141_102999_1	0	0	4	0	0	0	0
k141_103010_1	0	0	2	0	0	0	0
k141_103027_1	0	0	12	0	0	0	0
k141_103036_1	0	0	26	0	0	0	0
k141_103083_1	0	0	6	0	0	0	0
k141_103098_1	0	2	0	0	0	0	0
k141_103117_2	0	0	20	0	0	0	0
k141_103143_1	0	0	8	0	0	0	0
k141_103187_1	0	0	0	0	0	0	2
k141_103193_1	0	0	12	0	0	0	0
k141_103222_2	0	0	18	0	0	0	0
k141_103237_1	0	2	0	0	0	0	0
k141_103249_2	0	0	2	0	0	0	0
k141_103273_1	0	2	0	0	0	0	0
k141_103288_1	0	0	16	0	0	0	0
k141_103303_1	0	0	26	0	0	0	0
k141_103320_1	0	0	22	0	0	0	0
k141_103322_1	0	0	10	0	0	0	0
k141_103324_1	0	0	22	0	0	0	0
k141_103324_2	0	0	22	0	0	0	0
k141_103325_1	0	0	4	0	0	0	0
k141_103325_2	0	0	2	0	0	0	0
k141_10334_1	0	0	0	2	0	0	0
k141_103373_1	0	0	14	0	0	0	0
k141_103374_1	0	0	6	0	0	0	0
k141_103392_1	0	0	12	0	0	0	0
k141_103393_1	0	0	4	0	0	0	0
k141_103393_2	0	0	26	0	0	0	0
k141_103413_1	0	0	14	0	0	0	0
k141_103413_2	0	0	24	0	0	0	0
k141_10343_1	0	2	0	0	0	0	0
k141_103448_1	0	0	2	0	0	0	0
k141_10345_1	0	0	0	28	0	0	0
k141_10346_1	0	0	0	0	0	0	4
k141_103474_2	0	0	8	0	0	0	0
k141_103479_1	0	0	12	0	0	0	0
k141_103494_1	0	0	14	0	0	0	0
k141_103496_1	0	0	14	0	0	0	0
k141_103502_1	0	0	10	0	0	0	0
k141_103512_1	0	0	0	2	0	0	0
k141_103516_2	0	0	2	0	0	0	0
k141_103573_1	0	0	26	0	0	0	0
k141_103594_1	0	0	26	0	0	0	0
k141_103622_1	0	0	14	0	0	0	0
k141_103626_1	0	0	0	0	2	0	0
k141_103632_1	0	2	0	0	0	0	0
k141_103641_1	0	0	6	0	0	0	0
k141_103651_1	0	0	0	0	0	0	6
k141_103724_1	0	0	0	2	0	0	0
k141_103749_1	0	0	20	0	0	0	0
k141_103752_1	0	0	8	0	0	0	0
k141_103756_1	0	0	0	4	0	0	0
k141_103765_1	0	0	8	0	0	0	0
k141_103765_2	0	0	4	0	0	0	0
k141_10379_1	0	0	0	0	2	0	0
k141_103795_2	0	0	20	0	0	0	0
k141_1038_11	0	2	0	0	0	0	0
k141_1038_17	0	0	0	2	0	0	0
k141_1038_39	0	2	0	0	0	0	0
k141_1038_4	0	0	4	0	0	0	0
k141_103804_1	0	0	14	0	0	0	0
k141_103804_2	0	0	4	0	0	0	0
k141_103806_1	0	0	12	0	0	0	0
k141_103807_1	0	0	4	0	0	0	0
k141_103831_1	0	0	0	0	2	0	0
k141_103833_1	0	0	12	0	0	0	0
k141_103844_1	0	0	22	0	0	0	0
k141_103850_1	0	0	0	0	0	0	2
k141_103867_1	0	0	14	0	0	0	0
k141_103873_4	0	0	0	0	2	0	0
k141_103906_1	0	0	12	0	0	0	0
k141_103917_1	0	0	2	0	0	0	0
k141_103917_2	0	0	2	0	0	0	0
k141_103948_2	0	0	2	0	0	0	0
k141_103962_1	0	0	34	0	0	0	0
k141_103972_2	0	0	8	0	0	0	0
k141_103985_1	0	0	20	0	0	0	0
k141_104056_1	0	0	18	0	0	0	0
k141_104057_1	0	0	2	0	0	0	0
k141_104057_2	0	0	2	0	0	0	0
k141_104065_1	0	0	0	0	2	0	0
k141_104066_1	0	0	20	0	0	0	0
k141_104078_2	0	0	42	0	0	0	0
k141_104102_1	0	0	24	0	0	0	0
k141_104106_1	0	0	28	0	0	0	0
k141_104106_2	0	0	26	0	0	0	0
k141_104109_2	0	0	0	2	0	0	0
k141_104130_1	0	0	0	2	0	0	0
k141_104176_1	0	0	38	0	0	0	0
k141_10418_1	0	0	12	0	0	0	0
k141_104183_1	0	0	10	0	0	0	0
k141_104183_2	0	0	2	0	0	0	0
k141_104188_1	0	0	12	0	0	0	0
k141_104203_1	0	0	0	0	0	4	0
k141_104204_1	0	2	0	0	0	0	0
k141_104228_1	0	0	12	0	0	0	0
k141_104238_1	0	0	10	0	0	0	0
k141_104239_1	0	0	8	0	0	0	0
k141_104270_1	0	0	4	0	0	0	0
k141_104270_2	0	0	6	0	0	0	0
k141_104270_3	0	0	26	0	0	0	0
k141_10428_1	0	2	0	0	0	0	0
k141_104283_2	0	0	2	0	0	0	0
k141_104307_1	0	0	0	0	0	0	6
k141_104311_1	0	0	2	0	0	0	0
k141_104325_2	0	0	14	0	0	0	0
k141_104325_3	0	0	14	0	0	0	0
k141_104330_1	0	0	14	0	0	0	0
k141_104330_2	0	0	22	0	0	0	0
k141_104351_2	0	0	18	0	0	0	0
k141_104361_1	0	0	28	0	0	0	0
k141_104364_1	0	0	20	0	0	0	0
k141_104376_2	0	0	8	0	0	0	0
k141_104391_1	0	0	0	0	0	0	4
k141_1044_1	0	0	14	0	0	0	0
k141_104440_1	0	0	22	0	0	0	0
k141_104454_2	0	0	4	0	0	0	0
k141_104454_4	0	0	4	0	0	0	0
k141_104460_1	0	0	22	0	0	0	0
k141_104460_2	0	0	14	0	0	0	0
k141_104467_1	0	0	6	0	0	0	0
k141_104470_1	0	0	0	0	0	0	2
k141_104498_2	0	0	12	0	0	0	0
k141_104507_1	0	0	10	0	0	0	0
k141_104509_1	0	0	8	0	0	0	0
k141_104528_1	0	0	18	0	0	0	0
k141_104607_1	0	0	8	0	0	0	0
k141_104607_3	0	0	4	0	0	0	0
k141_104629_2	0	0	2	0	0	0	0
k141_104661_1	0	0	4	0	0	0	0
k141_104677_1	0	0	8	0	0	0	0
k141_104726_1	0	0	0	0	0	0	2
k141_10473_2	0	0	22	0	0	0	0
k141_10474_1	0	0	24	0	0	0	0
k141_104774_1	0	0	0	2	0	0	0
k141_104778_1	0	0	0	0	0	0	2
k141_10481_1	0	0	34	0	0	0	0
k141_104810_1	0	0	20	0	0	0	0
k141_104819_1	0	0	0	4	0	0	0
k141_104835_1	0	0	0	0	0	2	0
k141_104876_1	0	0	0	2	0	0	0
k141_104899_1	0	0	18	0	0	0	0
k141_104899_2	0	0	2	0	0	0	0
k141_104905_1	0	0	2	0	0	0	0
k141_104906_1	0	0	2	0	0	0	0
k141_104906_2	0	0	20	0	0	0	0
k141_105035_1	0	0	6	0	0	0	0
k141_105085_2	0	0	2	0	0	0	0
k141_105106_1	0	0	0	0	2	0	0
k141_105157_2	0	0	4	0	0	0	0
k141_105170_2	0	0	0	0	0	2	0
k141_105170_4	0	0	0	0	0	0	2
k141_105211_1	0	0	0	0	0	0	2
k141_105216_2	0	0	2	0	0	0	0
k141_105246_1	0	0	24	0	0	0	0
k141_105279_2	0	0	0	2	0	0	0
k141_10531_1	0	0	12	0	0	0	0
k141_105323_1	0	2	0	0	0	0	0
k141_105324_2	0	0	2	0	0	0	0
k141_105330_1	0	0	12	0	0	0	0
k141_105334_1	0	0	26	0	0	0	0
k141_105341_1	0	0	0	0	0	2	0
k141_105354_1	0	0	0	0	0	2	0
k141_105370_1	0	0	18	0	0	0	0
k141_10538_15	0	0	0	0	2	0	0
k141_10538_2	0	0	0	0	0	2	0
k141_10538_20	0	0	0	2	0	0	0
k141_10538_23	0	0	0	2	0	0	0
k141_10538_3	0	0	0	0	0	2	0
k141_10538_31	0	0	0	0	0	2	0
k141_10538_34	0	0	0	0	2	0	0
k141_10538_36	0	0	0	4	0	0	0
k141_10538_38	0	0	0	0	0	2	0
k141_10538_46	0	0	0	0	2	0	0
k141_10538_50	0	0	2	0	0	0	0
k141_105401_1	0	0	28	0	0	0	0
k141_105404_2	0	0	2	0	0	0	0
k141_105414_1	0	0	10	0	0	0	0
k141_105420_3	0	0	30	0	0	0	0
k141_10544_2	0	0	22	0	0	0	0
k141_105445_1	0	0	12	0	0	0	0
k141_10545_1	0	0	0	0	4	0	0
k141_105457_1	0	0	10	0	0	0	0
k141_105459_1	0	0	0	0	4	0	0
k141_10546_2	0	0	24	0	0	0	0
k141_105539_2	0	0	4	0	0	0	0
k141_105644_1	0	0	6	0	0	0	0
k141_105663_1	0	0	0	0	0	2	0
k141_10567_1	0	0	6	0	0	0	0
k141_105696_1	0	0	22	0	0	0	0
k141_105722_1	0	0	24	0	0	0	0
k141_105722_2	0	0	30	0	0	0	0
k141_105728_1	0	0	4	0	0	0	0
k141_10573_2	0	0	16	0	0	0	0
k141_105761_1	0	0	4	0	0	0	0
k141_105801_2	0	0	22	0	0	0	0
k141_105826_1	0	0	4	0	0	0	0
k141_105845_1	0	0	2	0	0	0	0
k141_105857_1	0	2	0	0	0	0	0
k141_105877_1	0	0	32	0	0	0	0
k141_105892_1	0	0	10	0	0	0	0
k141_105904_2	0	0	4	0	0	0	0
k141_105924_2	0	0	14	0	0	0	0
k141_105986_11	0	0	0	2	0	0	0
k141_105986_16	0	0	0	0	0	2	0
k141_105986_17	0	0	0	2	0	0	0
k141_105986_24	0	4	0	0	0	0	0
k141_105986_32	0	0	0	2	0	0	0
k141_105986_34	0	0	0	0	2	0	0
k141_105986_4	0	0	2	0	0	0	0
k141_105987_1	0	0	8	0	0	0	0
k141_1061_1	0	0	2	0	0	0	0
k141_106133_1	0	0	0	0	0	0	2
k141_106158_1	0	0	0	4	0	0	0
k141_106165_1	0	0	18	0	0	0	0
k141_106194_2	0	0	16	0	0	0	0
k141_106222_1	0	0	0	0	2	0	0
k141_106235_1	0	0	2	0	0	0	0
k141_10629_1	0	0	8	0	0	0	0
k141_106297_2	0	0	6	0	0	0	0
k141_106297_3	0	0	18	0	0	0	0
k141_106327_1	0	0	4	0	0	0	0
k141_106359_1	0	0	6	0	0	0	0
k141_106375_1	0	0	0	0	2	0	0
k141_106383_1	0	0	16	0	0	0	0
k141_106398_1	0	0	22	0	0	0	0
k141_10641_1	0	0	18	0	0	0	0
k141_106413_1	0	0	26	0	0	0	0
k141_106434_1	0	0	14	0	0	0	0
k141_106483_1	0	0	12	0	0	0	0
k141_106498_1	0	0	0	0	0	4	0
k141_106573_2	0	0	14	0	0	0	0
k141_106575_1	0	0	10	0	0	0	0
k141_106595_1	0	0	24	0	0	0	0
k141_106631_1	0	0	2	0	0	0	0
k141_106635_1	0	0	12	0	0	0	0
k141_106635_2	0	0	12	0	0	0	0
k141_10665_2	0	0	4	0	0	0	0
k141_106663_2	0	2	0	0	0	0	0
k141_106703_1	0	0	8	0	0	0	0
k141_106752_1	0	0	0	4	0	0	0
k141_106753_1	0	0	30	0	0	0	0
k141_106794_1	0	0	16	0	0	0	0
k141_106794_2	0	0	12	0	0	0	0
k141_10686_1	0	0	0	0	0	2	0
k141_106881_1	0	0	0	0	0	2	0
k141_106956_2	0	0	14	0	0	0	0
k141_106960_1	0	0	0	0	2	0	0
k141_106969_2	0	0	2	0	0	0	0
k141_10702_2	0	0	4	0	0	0	0
k141_107038_1	0	0	0	0	2	0	0
k141_107082_1	0	0	0	0	4	0	0
k141_107091_1	0	0	16	0	0	0	0
k141_10711_1	0	0	14	0	0	0	0
k141_107160_1	0	0	0	0	0	2	0
k141_107181_2	0	0	12	0	0	0	0
k141_107209_1	0	0	8	0	0	0	0
k141_107264_1	0	0	0	2	0	0	0
k141_107274_1	0	2	0	0	0	0	0
k141_10731_1	0	0	0	0	0	0	2
k141_107329_2	0	0	0	0	0	2	0
k141_107355_1	0	0	0	0	4	0	0
k141_107356_2	0	0	6	0	0	0	0
k141_107386_1	0	0	2	0	0	0	0
k141_107396_1	0	2	0	0	0	0	0
k141_107400_1	0	0	0	0	0	0	2
k141_107427_1	0	0	6	0	0	0	0
k141_107446_2	0	0	14	0	0	0	0
k141_107496_1	0	0	0	6	0	0	0
k141_107510_1	0	0	0	2	0	0	0
k141_107524_1	0	0	0	0	4	0	0
k141_107545_1	0	0	8	0	0	0	0
k141_10755_1	0	0	0	2	0	0	0
k141_107570_1	0	0	0	0	0	0	2
k141_107572_2	0	0	8	0	0	0	0
k141_107583_1	0	0	20	0	0	0	0
k141_107648_2	0	0	16	0	0	0	0
k141_107680_1	0	0	0	0	2	0	0
k141_10769_2	0	0	20	0	0	0	0
k141_107690_2	0	0	8	0	0	0	0
k141_10776_1	0	0	0	0	0	0	4
k141_107766_1	0	2	0	0	0	0	0
k141_107804_1	0	0	4	0	0	0	0
k141_10782_2	0	0	40	0	0	0	0
k141_107835_1	0	0	14	0	0	0	0
k141_107838_1	0	0	0	0	2	0	0
k141_107841_1	0	0	20	0	0	0	0
k141_107846_1	0	0	36	0	0	0	0
k141_107852_1	0	0	6	0	0	0	0
k141_107852_2	0	0	18	0	0	0	0
k141_107866_1	0	0	12	0	0	0	0
k141_107867_1	0	0	0	6	0	0	0
k141_107869_1	0	0	6	0	0	0	0
k141_107880_1	0	0	6	0	0	0	0
k141_107901_2	0	2	0	0	0	0	0
k141_107931_1	0	2	0	0	0	0	0
k141_107941_1	0	0	0	0	0	2	0
k141_107963_1	0	0	24	0	0	0	0
k141_107966_2	0	0	0	0	0	2	0
k141_107976_3	0	0	4	0	0	0	0
k141_108017_1	0	0	18	0	0	0	0
k141_108043_1	0	0	6	0	0	0	0
k141_108043_2	0	0	4	0	0	0	0
k141_108079_1	0	0	0	0	2	0	0
k141_108085_1	0	0	12	0	0	0	0
k141_108085_2	0	0	8	0	0	0	0
k141_108085_3	0	0	4	0	0	0	0
k141_108105_1	0	0	6	0	0	0	0
k141_108118_1	0	0	0	2	0	0	0
k141_108197_1	0	0	12	0	0	0	0
k141_108209_1	0	0	0	2	0	0	0
k141_108233_2	0	0	0	0	0	0	2
k141_108236_1	0	0	0	0	2	0	0
k141_108240_1	0	0	0	0	4	0	0
k141_108290_1	0	0	40	0	0	0	0
k141_108297_1	0	0	2	0	0	0	0
k141_108297_2	0	0	2	0	0	0	0
k141_1083_1	0	0	0	0	0	2	0
k141_108320_2	0	0	6	0	0	0	0
k141_108335_1	0	0	8	0	0	0	0
k141_108345_2	0	0	6	0	0	0	0
k141_10836_1	0	0	14	0	0	0	0
k141_108363_1	0	0	10	0	0	0	0
k141_108383_1	0	0	6	0	0	0	0
k141_108397_1	0	0	0	0	0	0	6
k141_108404_1	0	2	0	0	0	0	0
k141_108411_2	0	0	4	0	0	0	0
k141_108419_1	0	0	0	2	0	0	0
k141_108428_2	0	0	6	0	0	0	0
k141_10843_2	0	0	6	0	0	0	0
k141_10843_3	0	0	6	0	0	0	0
k141_108433_1	0	0	8	0	0	0	0
k141_108464_1	0	0	22	0	0	0	0
k141_108464_2	0	0	4	0	0	0	0
k141_108478_2	0	0	0	0	0	0	2
k141_10853_1	0	0	2	0	0	0	0
k141_108558_2	0	0	6	0	0	0	0
k141_108574_1	0	0	0	0	0	2	0
k141_108591_1	0	0	0	2	0	0	0
k141_108608_2	0	0	18	0	0	0	0
k141_108614_1	0	0	8	0	0	0	0
k141_108614_2	0	0	22	0	0	0	0
k141_108630_1	0	0	14	0	0	0	0
k141_10864_2	0	0	2	0	0	0	0
k141_108648_1	0	0	2	0	0	0	0
k141_108650_1	0	0	0	0	0	0	2
k141_10870_1	0	0	0	0	0	0	4
k141_108705_1	0	0	2	0	0	0	0
k141_108729_1	0	0	2	0	0	0	0
k141_108751_2	0	2	0	0	0	0	0
k141_108797_1	0	0	16	0	0	0	0
k141_108806_2	0	0	2	0	0	0	0
k141_108838_4	0	2	0	0	0	0	0
k141_108880_2	0	0	32	0	0	0	0
k141_108912_1	0	0	14	0	0	0	0
k141_108912_2	0	0	18	0	0	0	0
k141_108935_1	0	0	0	0	2	0	0
k141_108996_1	0	0	2	0	0	0	0
k141_1090_1	0	0	26	0	0	0	0
k141_109098_1	0	0	0	2	0	0	0
k141_109146_1	0	0	2	0	0	0	0
k141_1092_1	0	0	26	0	0	0	0
k141_109222_1	0	0	0	0	0	2	0
k141_10924_2	0	0	0	0	0	0	2
k141_109249_1	0	0	8	0	0	0	0
k141_109259_1	0	2	0	0	0	0	0
k141_10933_1	0	0	2	0	0	0	0
k141_10936_1	0	0	20	0	0	0	0
k141_10945_1	0	0	8	0	0	0	0
k141_10950_2	0	0	18	0	0	0	0
k141_10972_1	0	0	20	0	0	0	0
k141_10973_1	0	0	0	2	0	0	0
k141_10978_1	0	0	0	0	2	0	0
k141_11027_1	0	0	0	0	2	0	0
k141_11034_1	0	0	4	0	0	0	0
k141_11034_2	0	0	10	0	0	0	0
k141_11064_1	0	0	0	0	2	0	0
k141_1108_1	0	0	24	0	0	0	0
k141_11086_4	0	0	4	0	0	0	0
k141_11091_2	0	0	4	0	0	0	0
k141_11110_2	0	0	4	0	0	0	0
k141_11130_1	0	0	16	0	0	0	0
k141_11144_1	0	0	10	0	0	0	0
k141_11145_1	0	0	0	0	2	0	0
k141_11150_1	0	0	4	0	0	0	0
k141_11176_2	0	0	0	0	0	2	0
k141_11206_1	0	0	0	2	0	0	0
k141_11215_1	0	0	0	0	0	0	2
k141_11241_1	0	0	18	0	0	0	0
k141_11241_2	0	0	10	0	0	0	0
k141_11241_3	0	0	4	0	0	0	0
k141_1126_1	0	0	2	0	0	0	0
k141_11287_3	0	0	16	0	0	0	0
k141_11287_4	0	0	4	0	0	0	0
k141_1131_1	0	0	20	0	0	0	0
k141_11321_1	0	0	0	2	0	0	0
k141_11322_2	0	0	34	0	0	0	0
k141_11324_1	0	0	0	0	2	0	0
k141_11347_1	0	0	0	2	0	0	0
k141_11360_1	0	0	0	0	0	2	0
k141_11389_1	0	0	8	0	0	0	0
k141_11400_2	0	0	4	0	0	0	0
k141_11409_1	0	0	0	0	6	0	0
k141_11423_1	0	0	14	0	0	0	0
k141_11462_1	0	0	0	0	0	2	0
k141_11482_1	0	0	6	0	0	0	0
k141_11484_1	0	0	10	0	0	0	0
k141_11490_3	0	0	4	0	0	0	0
k141_11495_1	0	2	0	0	0	0	0
k141_11501_1	0	0	12	0	0	0	0
k141_11515_1	0	0	0	2	0	0	0
k141_11536_1	0	0	0	0	2	0	0
k141_11541_1	0	0	14	0	0	0	0
k141_11568_2	0	0	2	0	0	0	0
k141_11584_1	0	0	0	2	0	0	0
k141_11610_2	0	0	4	0	0	0	0
k141_11614_1	0	0	0	2	0	0	0
k141_11648_1	0	0	0	2	0	0	0
k141_11651_1	0	0	20	0	0	0	0
k141_11657_2	0	0	2	0	0	0	0
k141_11666_1	0	0	12	0	0	0	0
k141_11666_2	0	0	2	0	0	0	0
k141_11666_3	0	0	4	0	0	0	0
k141_11676_1	0	0	0	0	0	0	8
k141_11688_2	0	0	14	0	0	0	0
k141_11689_1	0	0	0	0	2	0	0
k141_11691_1	0	0	4	0	0	0	0
k141_1171_2	0	0	0	0	0	0	2
k141_11721_1	0	0	12	0	0	0	0
k141_11721_2	0	0	14	0	0	0	0
k141_11736_1	0	0	24	0	0	0	0
k141_11753_1	0	0	2	0	0	0	0
k141_11775_1	0	0	4	0	0	0	0
k141_11777_1	0	0	10	0	0	0	0
k141_11785_1	0	0	16	0	0	0	0
k141_11790_1	0	0	20	0	0	0	0
k141_11804_1	0	0	4	0	0	0	0
k141_11809_1	0	0	2	0	0	0	0
k141_11809_2	0	0	4	0	0	0	0
k141_11815_2	0	0	6	0	0	0	0
k141_11850_3	0	0	10	0	0	0	0
k141_11873_1	0	0	6	0	0	0	0
k141_11874_1	0	0	0	0	2	0	0
k141_119_1	0	0	0	0	0	0	4
k141_11902_1	0	0	40	0	0	0	0
k141_11915_1	0	0	8	0	0	0	0
k141_11930_1	0	0	4	0	0	0	0
k141_11937_2	0	0	14	0	0	0	0
k141_11975_1	0	0	0	0	0	2	0
k141_12016_2	0	0	0	4	0	0	0
k141_12019_4	0	0	0	0	0	2	0
k141_12029_1	0	0	0	4	0	0	0
k141_1203_1	0	0	6	0	0	0	0
k141_12052_1	0	0	0	2	0	0	0
k141_12072_1	0	0	0	0	0	0	2
k141_12090_2	0	0	2	0	0	0	0
k141_12096_1	0	2	0	0	0	0	0
k141_12107_2	0	0	8	0	0	0	0
k141_12118_2	0	0	20	0	0	0	0
k141_12141_1	0	0	10	0	0	0	0
k141_12141_2	0	0	2	0	0	0	0
k141_12153_1	0	0	16	0	0	0	0
k141_12158_1	0	0	12	0	0	0	0
k141_12158_2	0	0	12	0	0	0	0
k141_12185_1	0	0	2	0	0	0	0
k141_12211_1	0	0	28	0	0	0	0
k141_12222_2	0	0	0	2	0	0	0
k141_12233_1	0	2	0	0	0	0	0
k141_12263_2	0	0	4	0	0	0	0
k141_12267_1	0	0	14	0	0	0	0
k141_12281_1	0	0	6	0	0	0	0
k141_12281_2	0	0	4	0	0	0	0
k141_1231_1	0	0	0	0	0	2	0
k141_12322_1	0	0	6	0	0	0	0
k141_12324_1	0	0	22	0	0	0	0
k141_12358_2	0	0	20	0	0	0	0
k141_12404_1	0	0	8	0	0	0	0
k141_12408_1	0	0	10	0	0	0	0
k141_1242_1	0	0	4	0	0	0	0
k141_1242_2	0	0	6	0	0	0	0
k141_1244_1	0	0	0	4	0	0	0
k141_12448_1	0	0	18	0	0	0	0
k141_12448_2	0	0	16	0	0	0	0
k141_1245_1	0	0	24	0	0	0	0
k141_1246_3	0	0	0	0	0	2	0
k141_12465_1	0	0	0	0	2	0	0
k141_12477_1	0	0	0	0	6	0	0
k141_12505_1	0	0	22	0	0	0	0
k141_12537_1	0	2	0	0	0	0	0
k141_12552_1	0	0	0	0	0	4	0
k141_12554_1	0	0	0	0	0	2	0
k141_12566_1	0	0	16	0	0	0	0
k141_12567_1	0	0	18	0	0	0	0
k141_12573_1	0	0	6	0	0	0	0
k141_12597_2	0	0	0	0	0	2	0
k141_12612_2	0	0	0	0	2	0	0
k141_12612_3	0	4	0	0	0	0	0
k141_12626_1	0	0	2	0	0	0	0
k141_12642_1	0	0	28	0	0	0	0
k141_12647_2	0	0	24	0	0	0	0
k141_12673_2	0	0	2	0	0	0	0
k141_12679_2	0	0	0	0	0	2	0
k141_12735_1	0	0	4	0	0	0	0
k141_12755_1	0	0	16	0	0	0	0
k141_1276_2	0	0	6	0	0	0	0
k141_128_1	0	2	0	0	0	0	0
k141_1280_1	0	0	26	0	0	0	0
k141_12825_1	0	0	14	0	0	0	0
k141_12833_1	0	0	0	0	2	0	0
k141_12844_1	0	0	16	0	0	0	0
k141_12864_1	0	2	0	0	0	0	0
k141_12911_1	0	0	8	0	0	0	0
k141_12926_2	0	0	0	0	0	0	2
k141_12946_2	0	0	10	0	0	0	0
k141_12947_10	0	0	0	0	0	0	2
k141_12953_2	0	0	10	0	0	0	0
k141_12960_1	0	0	0	2	0	0	0
k141_12972_3	0	0	0	0	2	0	0
k141_13010_1	0	0	0	0	0	2	0
k141_1302_1	0	0	8	0	0	0	0
k141_1302_2	0	0	10	0	0	0	0
k141_13028_1	0	0	0	0	2	0	0
k141_13044_1	0	0	0	12	0	0	0
k141_1305_1	0	0	2	0	0	0	0
k141_13053_1	0	0	0	0	0	2	0
k141_13063_1	0	0	8	0	0	0	0
k141_1313_1	0	0	0	0	0	0	4
k141_13140_1	0	0	0	2	0	0	0
k141_13155_1	0	0	8	0	0	0	0
k141_13171_1	0	0	34	0	0	0	0
k141_13173_2	0	0	28	0	0	0	0
k141_13173_3	0	0	6	0	0	0	0
k141_13177_1	0	2	0	0	0	0	0
k141_13179_1	0	0	0	0	4	0	0
k141_13215_1	0	0	0	2	0	0	0
k141_13250_1	0	0	2	0	0	0	0
k141_13302_2	0	0	0	0	0	2	0
k141_13310_5	0	0	2	0	0	0	0
k141_13347_1	0	0	0	2	0	0	0
k141_1335_1	0	0	20	0	0	0	0
k141_13351_6	0	0	0	0	2	0	0
k141_13351_7	0	0	0	0	0	6	0
k141_13363_1	0	0	8	0	0	0	0
k141_13373_2	0	0	2	0	0	0	0
k141_13378_1	0	0	4	0	0	0	0
k141_13391_1	0	0	4	0	0	0	0
k141_13391_2	0	0	2	0	0	0	0
k141_134_3	0	0	8	0	0	0	0
k141_13402_1	0	0	16	0	0	0	0
k141_13402_2	0	0	6	0	0	0	0
k141_13403_1	0	0	2	0	0	0	0
k141_1342_1	0	0	36	0	0	0	0
k141_13455_1	0	0	16	0	0	0	0
k141_13497_1	0	0	8	0	0	0	0
k141_13506_1	0	0	2	0	0	0	0
k141_13547_1	0	0	16	0	0	0	0
k141_13567_2	0	0	16	0	0	0	0
k141_13576_1	0	0	0	0	2	0	0
k141_1359_1	0	0	0	2	0	0	0
k141_13614_1	0	2	0	0	0	0	0
k141_13627_1	0	0	20	0	0	0	0
k141_13640_1	0	0	14	0	0	0	0
k141_13658_1	0	0	0	0	0	2	0
k141_13659_2	0	0	4	0	0	0	0
k141_13669_1	0	0	0	4	0	0	0
k141_13718_1	0	0	6	0	0	0	0
k141_13722_1	0	0	12	0	0	0	0
k141_13732_1	0	0	0	2	0	0	0
k141_13745_1	0	0	0	0	0	2	0
k141_13754_15	0	2	0	0	0	0	0
k141_13754_18	0	0	0	0	2	0	0
k141_13754_2	0	2	0	0	0	0	0
k141_13754_21	0	0	0	0	0	2	0
k141_13754_23	0	0	0	0	0	2	0
k141_13754_26	0	0	0	2	0	0	0
k141_13754_33	0	6	0	0	0	0	0
k141_13754_50	0	0	0	0	0	2	0
k141_13754_7	0	0	0	0	0	2	0
k141_13776_1	0	0	0	0	2	0	0
k141_13777_1	0	0	4	0	0	0	0
k141_13810_1	0	0	4	0	0	0	0
k141_13821_1	0	0	24	0	0	0	0
k141_13838_2	0	0	10	0	0	0	0
k141_13865_1	0	14	0	0	0	0	0
k141_13919_1	0	0	6	0	0	0	0
k141_13933_1	0	0	28	0	0	0	0
k141_13955_1	0	0	22	0	0	0	0
k141_13957_2	0	0	10	0	0	0	0
k141_13980_1	0	2	0	0	0	0	0
k141_13992_1	0	0	0	0	2	0	0
k141_13997_1	0	0	0	0	0	0	4
k141_14013_1	0	0	24	0	0	0	0
k141_14023_2	0	0	6	0	0	0	0
k141_14025_1	0	0	0	0	2	0	0
k141_14030_2	0	0	0	2	0	0	0
k141_14033_1	0	0	10	0	0	0	0
k141_14049_1	0	0	2	0	0	0	0
k141_14049_2	0	0	34	0	0	0	0
k141_14057_1	0	0	0	0	2	0	0
k141_14079_1	0	0	28	0	0	0	0
k141_14081_1	0	0	0	0	0	2	0
k141_1409_1	0	0	0	0	2	0	0
k141_14114_1	0	0	20	0	0	0	0
k141_14114_2	0	0	10	0	0	0	0
k141_14127_1	0	0	10	0	0	0	0
k141_14127_2	0	0	16	0	0	0	0
k141_1413_1	0	0	6	0	0	0	0
k141_14137_3	0	0	2	0	0	0	0
k141_14150_1	0	0	22	0	0	0	0
k141_14159_1	0	0	0	2	0	0	0
k141_1418_1	0	2	0	0	0	0	0
k141_14210_1	0	0	0	0	2	0	0
k141_14229_1	0	0	2	0	0	0	0
k141_14242_1	0	0	0	0	0	2	0
k141_14271_1	0	0	26	0	0	0	0
k141_1432_1	0	0	10	0	0	0	0
k141_14321_1	0	0	0	0	2	0	0
k141_14326_1	0	0	0	0	0	2	0
k141_14336_1	0	0	16	0	0	0	0
k141_14355_1	0	0	16	0	0	0	0
k141_14360_1	0	0	0	2	0	0	0
k141_14385_2	0	0	0	0	0	2	0
k141_14400_1	0	0	8	0	0	0	0
k141_14413_1	0	0	0	2	0	0	0
k141_14427_1	0	0	12	0	0	0	0
k141_14449_2	0	0	2	0	0	0	0
k141_14453_1	0	0	6	0	0	0	0
k141_14462_1	0	0	2	0	0	0	0
k141_14462_2	0	0	4	0	0	0	0
k141_14503_2	0	0	16	0	0	0	0
k141_14505_1	0	0	0	0	2	0	0
k141_14510_1	0	0	0	2	0	0	0
k141_14544_1	0	0	0	0	0	2	0
k141_14569_1	0	0	0	2	0	0	0
k141_14581_1	0	0	0	0	2	0	0
k141_14582_1	0	0	0	0	0	0	2
k141_1463_1	0	0	18	0	0	0	0
k141_14640_1	0	0	0	0	2	0	0
k141_14661_1	0	0	12	0	0	0	0
k141_14680_1	0	0	6	0	0	0	0
k141_14686_1	0	0	0	0	0	2	0
k141_14729_1	0	0	18	0	0	0	0
k141_14739_1	0	0	16	0	0	0	0
k141_14754_1	0	0	0	0	0	4	0
k141_14777_1	0	0	0	2	0	0	0
k141_14810_2	0	0	10	0	0	0	0
k141_14819_1	0	6	0	0	0	0	0
k141_14824_1	0	0	0	2	0	0	0
k141_14855_1	0	0	0	0	2	0	0
k141_14859_1	0	0	0	0	4	0	0
k141_14868_1	0	0	0	0	2	0	0
k141_14878_1	0	0	0	0	0	2	0
k141_1489_2	0	0	16	0	0	0	0
k141_14896_1	0	0	2	0	0	0	0
k141_14902_2	0	0	14	0	0	0	0
k141_14928_1	0	0	6	0	0	0	0
k141_14937_2	0	2	0	0	0	0	0
k141_14945_2	0	0	4	0	0	0	0
k141_14955_2	0	0	10	0	0	0	0
k141_14964_1	0	0	2	0	0	0	0
k141_14988_2	0	0	4	0	0	0	0
k141_14994_1	0	0	2	0	0	0	0
k141_15004_2	0	0	2	0	0	0	0
k141_15063_1	0	0	6	0	0	0	0
k141_15091_3	0	0	2	0	0	0	0
k141_15108_1	0	0	0	0	0	2	0
k141_1512_1	0	0	0	2	0	0	0
k141_15144_1	0	0	2	0	0	0	0
k141_15156_1	0	0	0	2	0	0	0
k141_15180_2	0	0	0	2	0	0	0
k141_15206_1	0	0	8	0	0	0	0
k141_15235_1	0	0	0	0	0	0	2
k141_15250_1	0	0	0	0	2	0	0
k141_15252_1	0	0	0	0	2	0	0
k141_15261_1	0	0	26	0	0	0	0
k141_15273_1	0	0	6	0	0	0	0
k141_15275_1	0	0	10	0	0	0	0
k141_15282_1	0	6	0	0	0	0	0
k141_15319_2	0	0	34	0	0	0	0
k141_15330_1	0	0	12	0	0	0	0
k141_15330_2	0	0	18	0	0	0	0
k141_15336_1	0	0	6	0	0	0	0
k141_15360_1	0	0	18	0	0	0	0
k141_15379_1	0	0	10	0	0	0	0
k141_15383_1	0	0	4	0	0	0	0
k141_15384_1	0	0	0	0	2	0	0
k141_15386_1	0	0	12	0	0	0	0
k141_15405_2	0	0	8	0	0	0	0
k141_15419_1	0	0	10	0	0	0	0
k141_15420_1	0	0	2	0	0	0	0
k141_15420_2	0	0	14	0	0	0	0
k141_15420_3	0	0	2	0	0	0	0
k141_15421_1	0	0	0	0	0	2	0
k141_15431_1	0	0	0	2	0	0	0
k141_15438_1	0	0	14	0	0	0	0
k141_1544_1	0	0	0	2	0	0	0
k141_15444_1	0	0	0	0	0	2	0
k141_15466_1	0	0	2	0	0	0	0
k141_15466_3	0	0	2	0	0	0	0
k141_15478_1	0	0	38	0	0	0	0
k141_15498_2	0	0	8	0	0	0	0
k141_15530_2	0	0	24	0	0	0	0
k141_15535_1	0	0	0	0	0	2	0
k141_15542_17	0	0	0	0	2	0	0
k141_15542_22	0	0	0	0	2	0	0
k141_15542_23	0	0	0	2	0	0	0
k141_15542_28	0	2	0	0	0	0	0
k141_15542_31	0	0	0	0	0	2	0
k141_15542_44	0	0	0	0	0	0	4
k141_15542_52	0	0	0	0	0	2	0
k141_15550_1	0	0	0	0	0	2	0
k141_15568_1	0	0	18	0	0	0	0
k141_15593_1	0	0	4	0	0	0	0
k141_15593_3	0	0	20	0	0	0	0
k141_15599_1	0	0	16	0	0	0	0
k141_15625_1	0	0	6	0	0	0	0
k141_15634_1	0	0	6	0	0	0	0
k141_15634_2	0	0	28	0	0	0	0
k141_15634_3	0	0	16	0	0	0	0
k141_1564_1	0	0	20	0	0	0	0
k141_15652_1	0	0	2	0	0	0	0
k141_15690_101	0	0	4	0	0	0	0
k141_15690_104	0	0	2	0	0	0	0
k141_15690_11	0	2	0	0	0	0	0
k141_15690_114	0	0	0	2	0	0	0
k141_15690_116	0	0	0	0	2	0	0
k141_15690_121	0	0	0	0	0	2	0
k141_15690_125	0	0	2	0	0	0	0
k141_15690_126	0	0	2	0	0	0	0
k141_15690_134	0	0	0	0	0	0	2
k141_15690_143	0	0	0	0	2	0	0
k141_15690_146	0	2	0	0	0	0	0
k141_15690_149	0	0	0	0	0	4	0
k141_15690_153	0	0	0	0	0	4	0
k141_15690_160	0	2	0	0	0	0	0
k141_15690_163	0	0	0	2	0	0	0
k141_15690_170	0	0	0	8	0	0	0
k141_15690_172	0	0	0	2	0	0	0
k141_15690_173	0	0	0	0	4	0	0
k141_15690_174	0	0	0	0	0	2	0
k141_15690_175	0	0	0	2	0	0	0
k141_15690_180	0	0	0	0	0	2	0
k141_15690_29	0	0	0	0	0	4	0
k141_15690_37	0	0	2	0	0	0	0
k141_15690_61	0	0	4	0	0	0	0
k141_15690_66	0	0	0	2	0	0	0
k141_15690_73	0	0	0	0	4	0	0
k141_15690_81	0	0	0	0	2	0	0
k141_15690_85	0	0	0	0	0	2	0
k141_15690_89	0	0	0	0	0	2	0
k141_15690_93	0	0	0	0	0	2	0
k141_15690_94	0	0	0	0	2	0	0
k141_15690_95	0	0	0	2	0	0	0
k141_15690_96	0	2	0	0	0	0	0
k141_15699_1	0	0	0	2	0	0	0
k141_15737_1	0	0	66	0	0	0	0
k141_15737_2	0	0	2	0	0	0	0
k141_15751_2	0	0	2	0	0	0	0
k141_15799_1	0	0	8	0	0	0	0
k141_15809_1	0	0	0	0	10	0	0
k141_15818_3	0	0	2	0	0	0	0
k141_15831_1	0	0	0	0	0	0	2
k141_15873_1	0	0	0	2	0	0	0
k141_15885_1	0	0	0	2	0	0	0
k141_15897_1	0	0	14	0	0	0	0
k141_15934_21	0	2	0	0	0	0	0
k141_15934_25	0	0	0	0	2	0	0
k141_15934_30	0	0	0	2	0	0	0
k141_15934_35	0	0	0	0	0	2	0
k141_15934_56	0	6	0	0	0	0	0
k141_15934_57	0	0	0	2	0	0	0
k141_15934_58	0	0	0	0	0	2	0
k141_15934_6	0	0	0	2	0	0	0
k141_15934_66	0	2	0	0	0	0	0
k141_15934_73	0	0	0	0	0	2	0
k141_15938_1	0	0	6	0	0	0	0
k141_15939_1	0	0	6	0	0	0	0
k141_15951_1	0	0	0	0	2	0	0
k141_15952_1	0	0	0	0	2	0	0
k141_16022_1	0	0	0	2	0	0	0
k141_1604_1	0	0	6	0	0	0	0
k141_1604_2	0	0	22	0	0	0	0
k141_16127_1	0	0	0	0	2	0	0
k141_16136_2	0	0	0	0	2	0	0
k141_16145_2	0	0	2	0	0	0	0
k141_16145_3	0	0	2	0	0	0	0
k141_16165_1	0	0	16	0	0	0	0
k141_16184_2	0	0	4	0	0	0	0
k141_16187_2	0	0	0	0	0	0	2
k141_16216_7	0	2	0	0	0	0	0
k141_16238_2	0	0	2	0	0	0	0
k141_16244_1	0	0	0	2	0	0	0
k141_16265_2	0	0	8	0	0	0	0
k141_16283_1	0	0	22	0	0	0	0
k141_16336_1	0	0	12	0	0	0	0
k141_16336_2	0	0	20	0	0	0	0
k141_16343_1	0	0	0	0	0	2	0
k141_16382_1	0	0	8	0	0	0	0
k141_16399_1	0	0	4	0	0	0	0
k141_16399_3	0	0	8	0	0	0	0
k141_16401_4	0	2	0	0	0	0	0
k141_16435_1	0	0	0	2	0	0	0
k141_16449_1	0	0	14	0	0	0	0
k141_16452_1	0	0	2	0	0	0	0
k141_16453_2	0	0	0	0	0	2	0
k141_16478_1	0	0	0	2	0	0	0
k141_16491_1	0	0	0	2	0	0	0
k141_16531_1	0	0	0	0	0	2	0
k141_16544_1	0	0	0	0	2	0	0
k141_16550_1	0	0	0	4	0	0	0
k141_16588_1	0	0	0	2	0	0	0
k141_16590_1	0	2	0	0	0	0	0
k141_16602_2	0	0	0	2	0	0	0
k141_1664_1	0	0	6	0	0	0	0
k141_1664_2	0	0	6	0	0	0	0
k141_1664_3	0	0	8	0	0	0	0
k141_16657_1	0	0	20	0	0	0	0
k141_16672_1	0	0	0	2	0	0	0
k141_16719_1	0	2	0	0	0	0	0
k141_16720_2	0	0	12	0	0	0	0
k141_16720_3	0	0	14	0	0	0	0
k141_16729_1	0	0	8	0	0	0	0
k141_16760_1	0	0	40	0	0	0	0
k141_16795_2	0	0	2	0	0	0	0
k141_1680_1	0	0	4	0	0	0	0
k141_16808_1	0	0	16	0	0	0	0
k141_16812_1	0	0	0	0	4	0	0
k141_16825_1	0	0	4	0	0	0	0
k141_16879_1	0	0	26	0	0	0	0
k141_1688_1	0	0	0	8	0	0	0
k141_16939_1	0	0	0	0	0	6	0
k141_16972_1	0	0	4	0	0	0	0
k141_16977_1	0	0	0	0	0	0	2
k141_16996_1	0	0	2	0	0	0	0
k141_17004_1	0	0	2	0	0	0	0
k141_17021_1	0	0	12	0	0	0	0
k141_17033_1	0	0	0	0	2	0	0
k141_17034_1	0	0	0	2	0	0	0
k141_17037_1	0	0	0	0	0	2	0
k141_1704_1	0	0	12	0	0	0	0
k141_17074_1	0	0	6	0	0	0	0
k141_17092_1	0	0	12	0	0	0	0
k141_17106_1	0	0	4	0	0	0	0
k141_17114_1	0	2	0	0	0	0	0
k141_17129_1	0	0	26	0	0	0	0
k141_17182_2	0	0	6	0	0	0	0
k141_17189_1	0	0	0	2	0	0	0
k141_17213_1	0	0	8	0	0	0	0
k141_17223_1	0	0	2	0	0	0	0
k141_17259_2	0	0	0	0	2	0	0
k141_17284_2	0	0	2	0	0	0	0
k141_17290_1	0	0	0	0	2	0	0
k141_17304_1	0	0	10	0	0	0	0
k141_1731_1	0	0	0	0	2	0	0
k141_17316_1	0	0	4	0	0	0	0
k141_17342_1	0	0	36	0	0	0	0
k141_17361_1	0	0	0	0	0	4	0
k141_17380_1	0	0	0	0	2	0	0
k141_17381_1	0	0	2	0	0	0	0
k141_17381_2	0	0	8	0	0	0	0
k141_17426_1	0	0	28	0	0	0	0
k141_17458_2	0	0	0	2	0	0	0
k141_17486_1	0	0	6	0	0	0	0
k141_17494_1	0	0	18	0	0	0	0
k141_17503_2	0	0	0	2	0	0	0
k141_17511_1	0	0	2	0	0	0	0
k141_17515_2	0	0	0	2	0	0	0
k141_17517_1	0	0	0	0	6	0	0
k141_1752_1	0	0	4	0	0	0	0
k141_1752_2	0	0	16	0	0	0	0
k141_17520_1	0	2	0	0	0	0	0
k141_17524_2	0	0	2	0	0	0	0
k141_17542_1	0	0	0	2	0	0	0
k141_17549_1	0	0	0	0	0	2	0
k141_17606_1	0	0	8	0	0	0	0
k141_17621_2	0	0	0	2	0	0	0
k141_17623_103	0	2	0	0	0	0	0
k141_17623_110	0	2	0	0	0	0	0
k141_17623_113	0	0	0	0	0	2	0
k141_17623_125	0	0	0	2	0	0	0
k141_17623_133	0	0	0	2	0	0	0
k141_17623_134	0	0	0	2	0	0	0
k141_17623_145	0	0	0	0	2	0	0
k141_17623_149	0	0	0	0	0	2	0
k141_17623_153	0	0	0	0	0	2	0
k141_17623_166	0	0	0	2	0	0	0
k141_17623_168	0	0	0	0	0	2	0
k141_17623_169	0	0	0	2	0	0	0
k141_17623_177	0	0	0	0	0	2	0
k141_17623_178	0	0	0	0	2	0	0
k141_17623_184	0	2	0	0	0	0	0
k141_17623_185	0	0	0	0	0	2	0
k141_17623_196	0	0	0	0	0	2	0
k141_17623_203	0	0	6	0	0	0	0
k141_17623_212	0	0	0	0	0	0	2
k141_17623_214	0	0	0	2	0	0	0
k141_17623_219	0	0	2	0	0	0	0
k141_17623_222	0	0	2	0	0	0	0
k141_17623_226	0	0	8	0	0	0	0
k141_17623_23	0	0	0	0	2	0	0
k141_17623_231	0	0	0	2	0	0	0
k141_17623_234	0	4	0	0	0	0	0
k141_17623_237	0	0	0	0	0	2	0
k141_17623_24	0	0	2	0	0	0	0
k141_17623_245	0	0	0	0	4	0	0
k141_17623_246	0	0	0	0	0	2	0
k141_17623_264	0	0	0	0	0	2	0
k141_17623_267	0	0	0	0	0	2	0
k141_17623_275	0	0	2	0	0	0	0
k141_17623_285	0	2	0	0	0	0	0
k141_17623_303	0	0	0	2	0	0	0
k141_17623_306	0	2	0	0	0	0	0
k141_17623_307	0	0	0	0	2	0	0
k141_17623_31	0	0	0	0	0	2	0
k141_17623_317	0	0	0	0	2	0	0
k141_17623_33	0	0	0	2	0	0	0
k141_17623_336	0	0	0	0	0	2	0
k141_17623_340	0	0	0	0	4	0	0
k141_17623_358	0	0	0	0	0	6	0
k141_17623_365	0	0	0	2	0	0	0
k141_17623_367	0	0	2	0	0	0	0
k141_17623_369	0	0	0	2	0	0	0
k141_17623_379	0	0	0	0	2	0	0
k141_17623_387	0	0	4	0	0	0	0
k141_17623_389	0	0	0	0	2	0	0
k141_17623_398	0	0	0	0	2	0	0
k141_17623_404	0	0	0	4	0	0	0
k141_17623_406	0	2	0	0	0	0	0
k141_17623_42	0	0	0	0	2	0	0
k141_17623_44	0	0	0	2	0	0	0
k141_17623_5	0	0	0	2	0	0	0
k141_17623_50	0	0	0	0	2	0	0
k141_17623_52	0	0	0	0	0	2	0
k141_17623_54	0	0	0	0	0	4	0
k141_17623_57	0	0	0	2	0	0	0
k141_17623_60	0	0	0	2	0	0	0
k141_17623_69	0	0	0	0	2	0	0
k141_17623_85	0	0	2	0	0	0	0
k141_17623_93	0	0	0	0	0	2	0
k141_17623_95	0	0	0	0	0	2	0
k141_17634_3	0	0	0	2	0	0	0
k141_17655_2	0	0	14	0	0	0	0
k141_17659_1	0	0	0	2	0	0	0
k141_17663_2	0	0	4	0	0	0	0
k141_17671_1	0	0	28	0	0	0	0
k141_17686_1	0	0	0	0	2	0	0
k141_1769_1	0	0	4	0	0	0	0
k141_1769_2	0	0	6	0	0	0	0
k141_17758_1	0	0	4	0	0	0	0
k141_17769_1	0	0	0	2	0	0	0
k141_17797_1	0	0	10	0	0	0	0
k141_17824_1	0	0	0	0	6	0	0
k141_17825_2	0	0	2	0	0	0	0
k141_17901_1	0	0	0	0	0	0	6
k141_17918_2	0	0	16	0	0	0	0
k141_17974_1	0	2	0	0	0	0	0
k141_18003_1	0	0	0	2	0	0	0
k141_18015_1	0	0	0	0	2	0	0
k141_18064_1	0	0	0	0	0	0	4
k141_1809_3	0	0	8	0	0	0	0
k141_18114_1	0	0	4	0	0	0	0
k141_18123_1	0	0	0	2	0	0	0
k141_18144_1	0	0	2	0	0	0	0
k141_18144_2	0	0	6	0	0	0	0
k141_18162_1	0	0	10	0	0	0	0
k141_18169_2	0	0	10	0	0	0	0
k141_18215_1	0	0	14	0	0	0	0
k141_18268_1	0	0	4	0	0	0	0
k141_183_1	0	0	32	0	0	0	0
k141_18302_1	0	4	0	0	0	0	0
k141_18305_1	0	2	0	0	0	0	0
k141_1831_1	0	0	14	0	0	0	0
k141_1831_2	0	0	12	0	0	0	0
k141_18312_1	0	0	0	2	0	0	0
k141_18313_1	0	0	0	0	2	0	0
k141_18336_1	0	0	0	0	0	2	0
k141_18342_1	0	0	0	2	0	0	0
k141_18357_1	0	0	2	0	0	0	0
k141_18364_1	0	0	0	0	6	0	0
k141_18420_1	0	0	16	0	0	0	0
k141_18425_1	0	0	0	2	0	0	0
k141_18478_2	0	0	0	0	2	0	0
k141_18486_1	0	0	0	2	0	0	0
k141_1850_1	0	0	2	0	0	0	0
k141_18583_1	0	0	0	0	0	2	0
k141_18587_2	0	0	24	0	0	0	0
k141_18593_2	0	0	2	0	0	0	0
k141_18616_1	0	0	0	0	0	2	0
k141_18618_1	0	0	8	0	0	0	0
k141_18652_1	0	0	24	0	0	0	0
k141_1867_1	0	0	24	0	0	0	0
k141_18723_1	0	0	0	2	0	0	0
k141_1873_1	0	0	18	0	0	0	0
k141_18730_12	0	0	4	0	0	0	0
k141_18730_5	0	0	0	0	0	4	0
k141_18730_9	0	2	0	0	0	0	0
k141_18808_2	0	0	0	6	0	0	0
k141_18814_1	0	2	0	0	0	0	0
k141_18815_1	0	0	0	0	0	2	0
k141_1882_2	0	0	4	0	0	0	0
k141_18822_2	0	0	0	0	2	0	0
k141_1883_2	0	0	0	0	0	0	8
k141_18836_1	0	0	0	0	2	0	0
k141_18859_2	0	0	0	4	0	0	0
k141_18871_2	0	0	14	0	0	0	0
k141_18874_1	0	0	0	0	0	2	0
k141_18883_1	0	0	0	0	4	0	0
k141_18916_1	0	0	10	0	0	0	0
k141_18922_1	0	0	0	0	2	0	0
k141_18970_1	0	0	12	0	0	0	0
k141_18976_1	0	0	2	0	0	0	0
k141_19017_1	0	0	8	0	0	0	0
k141_19047_1	0	0	4	0	0	0	0
k141_19051_1	0	0	0	2	0	0	0
k141_19067_3	0	0	8	0	0	0	0
k141_19083_1	0	0	6	0	0	0	0
k141_191_1	0	0	2	0	0	0	0
k141_19105_1	0	0	0	0	0	0	2
k141_19106_1	0	0	0	0	0	0	2
k141_1912_1	0	0	8	0	0	0	0
k141_19171_2	0	0	0	0	2	0	0
k141_19175_1	0	2	0	0	0	0	0
k141_19178_1	0	0	2	0	0	0	0
k141_19181_1	0	0	4	0	0	0	0
k141_1921_1	0	0	0	2	0	0	0
k141_19235_2	0	0	0	8	0	0	0
k141_1925_1	0	2	0	0	0	0	0
k141_19308_2	0	0	12	0	0	0	0
k141_19361_1	0	0	0	2	0	0	0
k141_19362_1	0	0	0	0	2	0	0
k141_19367_1	0	0	0	0	0	0	2
k141_1937_2	0	4	0	0	0	0	0
k141_19383_1	0	0	28	0	0	0	0
k141_19393_1	0	0	10	0	0	0	0
k141_19400_1	0	0	32	0	0	0	0
k141_19400_2	0	0	20	0	0	0	0
k141_19425_1	0	0	14	0	0	0	0
k141_19430_1	0	0	0	0	0	2	0
k141_19433_1	0	0	20	0	0	0	0
k141_19439_8	0	4	0	0	0	0	0
k141_19443_1	0	0	4	0	0	0	0
k141_19449_1	0	0	2	0	0	0	0
k141_19493_1	0	0	16	0	0	0	0
k141_19493_2	0	0	10	0	0	0	0
k141_19494_1	0	0	6	0	0	0	0
k141_19552_2	0	0	6	0	0	0	0
k141_19559_1	0	0	14	0	0	0	0
k141_19598_2	0	0	6	0	0	0	0
k141_19602_1	0	0	4	0	0	0	0
k141_19634_1	0	0	30	0	0	0	0
k141_19636_1	0	0	0	4	0	0	0
k141_19641_2	0	0	4	0	0	0	0
k141_1965_1	0	0	8	0	0	0	0
k141_19672_1	0	0	0	0	2	0	0
k141_19701_1	0	0	4	0	0	0	0
k141_19723_1	0	0	12	0	0	0	0
k141_19723_2	0	0	8	0	0	0	0
k141_19732_2	0	0	26	0	0	0	0
k141_19749_2	0	0	0	0	0	2	0
k141_19770_1	0	0	8	0	0	0	0
k141_19773_1	0	0	10	0	0	0	0
k141_19775_1	0	0	4	0	0	0	0
k141_19775_2	0	0	2	0	0	0	0
k141_19799_1	0	0	0	2	0	0	0
k141_19800_1	0	0	0	0	2	0	0
k141_19804_1	0	0	8	0	0	0	0
k141_19804_2	0	0	22	0	0	0	0
k141_19806_1	0	2	0	0	0	0	0
k141_19823_2	0	0	6	0	0	0	0
k141_19842_1	0	0	4	0	0	0	0
k141_19842_2	0	0	2	0	0	0	0
k141_19853_1	0	0	10	0	0	0	0
k141_19859_1	0	0	2	0	0	0	0
k141_19859_2	0	0	2	0	0	0	0
k141_19869_2	0	0	0	0	0	6	0
k141_19892_1	0	0	26	0	0	0	0
k141_19910_1	0	0	0	0	0	2	0
k141_19913_1	0	0	6	0	0	0	0
k141_19939_1	0	2	0	0	0	0	0
k141_19981_1	0	0	6	0	0	0	0
k141_19984_1	0	0	18	0	0	0	0
k141_20039_2	0	0	6	0	0	0	0
k141_20054_1	0	0	4	0	0	0	0
k141_20055_1	0	0	0	0	0	2	0
k141_20066_1	0	0	0	0	0	2	0
k141_20092_5	0	0	0	0	0	2	0
k141_20094_1	0	0	4	0	0	0	0
k141_20118_1	0	0	2	0	0	0	0
k141_20140_1	0	0	0	0	0	2	0
k141_20149_1	0	0	0	2	0	0	0
k141_20166_1	0	0	12	0	0	0	0
k141_2017_1	0	0	34	0	0	0	0
k141_20171_1	0	2	0	0	0	0	0
k141_20172_1	0	0	6	0	0	0	0
k141_20172_2	0	0	8	0	0	0	0
k141_20182_2	0	0	0	0	0	2	0
k141_20202_1	0	0	10	0	0	0	0
k141_20229_1	0	0	0	2	0	0	0
k141_20292_1	0	0	0	0	0	10	0
k141_20296_2	0	0	4	0	0	0	0
k141_20300_1	0	0	0	0	0	2	0
k141_20317_1	0	0	10	0	0	0	0
k141_20317_2	0	0	6	0	0	0	0
k141_20325_2	0	0	18	0	0	0	0
k141_2034_1	0	0	20	0	0	0	0
k141_20346_1	0	0	4	0	0	0	0
k141_20352_1	0	0	28	0	0	0	0
k141_20369_1	0	0	0	0	0	4	0
k141_20388_3	0	0	2	0	0	0	0
k141_20462_2	0	0	2	0	0	0	0
k141_20501_1	0	0	0	0	2	0	0
k141_20503_11	0	0	0	0	2	0	0
k141_20503_17	0	0	0	0	0	2	0
k141_20503_18	0	0	0	2	0	0	0
k141_20503_23	0	0	4	0	0	0	0
k141_20503_3	0	8	0	0	0	0	0
k141_20503_37	0	2	0	0	0	0	0
k141_20503_4	0	0	0	6	0	0	0
k141_20503_43	0	0	0	2	0	0	0
k141_20514_3	0	4	0	0	0	0	0
k141_20533_3	0	0	14	0	0	0	0
k141_20567_1	0	0	10	0	0	0	0
k141_20568_1	0	0	0	4	0	0	0
k141_20610_1	0	0	10	0	0	0	0
k141_20612_2	0	0	0	0	0	2	0
k141_20623_2	0	0	14	0	0	0	0
k141_20637_1	0	2	0	0	0	0	0
k141_20639_3	0	0	2	0	0	0	0
k141_20648_1	0	0	8	0	0	0	0
k141_2065_3	0	0	8	0	0	0	0
k141_20664_1	0	2	0	0	0	0	0
k141_20678_1	0	0	6	0	0	0	0
k141_20719_1	0	0	2	0	0	0	0
k141_20741_2	0	0	8	0	0	0	0
k141_20744_1	0	0	6	0	0	0	0
k141_20751_2	0	0	10	0	0	0	0
k141_20787_1	0	0	18	0	0	0	0
k141_20837_1	0	0	0	0	2	0	0
k141_2085_1	0	0	0	0	0	2	0
k141_20862_1	0	0	0	0	0	6	0
k141_2088_1	0	0	0	0	0	2	0
k141_20887_1	0	0	2	0	0	0	0
k141_20924_2	0	0	0	0	0	2	0
k141_20941_1	0	0	0	0	2	0	0
k141_20944_1	0	0	0	0	2	0	0
k141_20986_1	0	0	18	0	0	0	0
k141_21007_1	0	0	0	0	2	0	0
k141_21012_1	0	0	0	2	0	0	0
k141_21028_1	0	0	0	2	0	0	0
k141_21029_1	0	0	2	0	0	0	0
k141_21036_2	0	4	0	0	0	0	0
k141_21046_1	0	0	0	0	2	0	0
k141_21057_1	0	0	12	0	0	0	0
k141_21070_1	0	0	0	2	0	0	0
k141_21075_1	0	0	0	2	0	0	0
k141_21088_1	0	0	12	0	0	0	0
k141_21101_1	0	0	0	0	2	0	0
k141_21116_2	0	0	2	0	0	0	0
k141_21165_1	0	0	0	2	0	0	0
k141_21167_3	0	0	6	0	0	0	0
k141_21189_2	0	0	6	0	0	0	0
k141_21328_1	0	0	0	0	2	0	0
k141_21343_1	0	0	2	0	0	0	0
k141_21350_2	0	0	8	0	0	0	0
k141_21367_1	0	0	4	0	0	0	0
k141_2137_1	0	0	0	2	0	0	0
k141_21372_1	0	0	0	0	0	2	0
k141_21374_1	0	0	0	0	0	0	2
k141_21385_1	0	0	0	0	4	0	0
k141_21446_1	0	0	18	0	0	0	0
k141_21467_1	0	0	0	0	2	0	0
k141_21471_1	0	0	20	0	0	0	0
k141_21474_1	0	0	0	0	0	0	2
k141_21482_1	0	0	8	0	0	0	0
k141_21516_1	0	2	0	0	0	0	0
k141_21537_1	0	0	0	0	0	2	0
k141_21551_2	0	0	2	0	0	0	0
k141_21581_1	0	0	4	0	0	0	0
k141_21596_1	0	0	12	0	0	0	0
k141_21607_1	0	0	4	0	0	0	0
k141_21646_1	0	0	8	0	0	0	0
k141_21680_1	0	0	0	0	0	2	0
k141_21681_2	0	0	20	0	0	0	0
k141_21687_1	0	0	0	0	0	2	0
k141_21697_1	0	0	0	2	0	0	0
k141_21700_2	0	0	4	0	0	0	0
k141_2171_1	0	0	6	0	0	0	0
k141_21714_3	0	0	0	2	0	0	0
k141_21718_2	0	0	0	0	0	2	0
k141_21724_1	0	0	0	2	0	0	0
k141_21731_1	0	0	0	0	0	2	0
k141_21763_1	0	0	2	0	0	0	0
k141_21808_1	0	0	28	0	0	0	0
k141_2181_2	0	0	6	0	0	0	0
k141_21834_1	0	0	4	0	0	0	0
k141_21848_1	0	0	0	0	0	14	0
k141_21866_1	0	0	0	0	0	2	0
k141_2187_1	0	0	18	0	0	0	0
k141_21880_1	0	0	0	0	2	0	0
k141_21888_1	0	0	0	0	2	0	0
k141_21892_1	0	0	16	0	0	0	0
k141_21893_1	0	0	10	0	0	0	0
k141_2191_3	0	0	0	0	0	0	4
k141_21944_1	0	0	0	0	2	0	0
k141_21956_1	0	0	2	0	0	0	0
k141_21966_1	0	2	0	0	0	0	0
k141_21976_2	0	0	12	0	0	0	0
k141_2198_1	0	0	0	0	0	0	2
k141_21985_3	0	0	0	0	0	2	0
k141_21999_1	0	0	0	0	0	2	0
k141_22012_2	0	0	2	0	0	0	0
k141_2205_2	0	0	10	0	0	0	0
k141_22064_3	0	0	8	0	0	0	0
k141_22064_4	0	0	4	0	0	0	0
k141_22068_1	0	0	22	0	0	0	0
k141_22091_1	0	0	10	0	0	0	0
k141_22100_1	0	0	2	0	0	0	0
k141_22114_1	0	0	8	0	0	0	0
k141_22129_1	0	0	0	0	2	0	0
k141_22303_1	0	0	0	2	0	0	0
k141_22304_1	0	0	0	0	0	2	0
k141_22325_1	0	2	0	0	0	0	0
k141_22328_1	0	0	40	0	0	0	0
k141_22344_1	0	0	4	0	0	0	0
k141_22374_2	0	0	20	0	0	0	0
k141_22374_3	0	0	8	0	0	0	0
k141_22378_1	0	0	0	2	0	0	0
k141_22384_1	0	0	28	0	0	0	0
k141_22391_1	0	0	6	0	0	0	0
k141_22399_2	0	0	26	0	0	0	0
k141_22427_1	0	0	14	0	0	0	0
k141_2243_1	0	0	14	0	0	0	0
k141_22431_1	0	0	0	0	2	0	0
k141_22468_1	0	2	0	0	0	0	0
k141_2250_1	0	0	20	0	0	0	0
k141_22584_1	0	0	4	0	0	0	0
k141_22584_2	0	0	6	0	0	0	0
k141_22594_1	0	0	20	0	0	0	0
k141_22595_1	0	6	0	0	0	0	0
k141_22599_1	0	0	2	0	0	0	0
k141_22614_1	0	0	4	0	0	0	0
k141_22617_1	0	0	4	0	0	0	0
k141_2263_1	0	0	0	2	0	0	0
k141_22630_1	0	0	0	0	0	0	8
k141_22641_1	0	0	8	0	0	0	0
k141_22653_1	0	0	24	0	0	0	0
k141_22700_1	0	0	8	0	0	0	0
k141_22705_1	0	0	0	0	0	2	0
k141_22708_1	0	0	18	0	0	0	0
k141_22708_2	0	0	14	0	0	0	0
k141_22765_2	0	0	0	2	0	0	0
k141_22782_1	0	0	12	0	0	0	0
k141_22807_1	0	0	0	2	0	0	0
k141_22809_2	0	0	4	0	0	0	0
k141_22810_2	0	0	4	0	0	0	0
k141_22813_2	0	0	0	0	2	0	0
k141_22818_1	0	0	2	0	0	0	0
k141_22828_1	0	0	12	0	0	0	0
k141_22844_2	0	0	14	0	0	0	0
k141_22847_2	0	2	0	0	0	0	0
k141_22916_1	0	0	26	0	0	0	0
k141_22944_2	0	0	36	0	0	0	0
k141_22949_1	0	0	0	0	0	0	12
k141_22985_1	0	0	0	0	0	2	0
k141_22986_1	0	0	10	0	0	0	0
k141_230_1	0	2	0	0	0	0	0
k141_23017_1	0	0	6	0	0	0	0
k141_23017_2	0	0	4	0	0	0	0
k141_23020_1	0	0	4	0	0	0	0
k141_23024_1	0	0	2	0	0	0	0
k141_23024_2	0	0	24	0	0	0	0
k141_23031_1	0	0	0	6	0	0	0
k141_23047_1	0	0	2	0	0	0	0
k141_23047_5	0	0	0	0	2	0	0
k141_23048_1	0	0	12	0	0	0	0
k141_23060_1	0	0	0	0	0	2	0
k141_23103_1	0	0	16	0	0	0	0
k141_23103_2	0	0	12	0	0	0	0
k141_23123_1	0	0	12	0	0	0	0
k141_23145_1	0	0	0	2	0	0	0
k141_23146_1	0	0	10	0	0	0	0
k141_23147_1	0	0	16	0	0	0	0
k141_23164_1	0	0	0	0	0	4	0
k141_23170_2	0	0	0	0	4	0	0
k141_23186_1	0	0	0	2	0	0	0
k141_23199_2	0	0	26	0	0	0	0
k141_23200_1	0	0	0	0	0	2	0
k141_23200_2	0	0	0	0	2	0	0
k141_23237_1	0	0	0	0	0	2	0
k141_23265_1	0	0	0	0	0	0	2
k141_23286_1	0	0	6	0	0	0	0
k141_23286_2	0	0	2	0	0	0	0
k141_23297_1	0	0	24	0	0	0	0
k141_23299_1	0	0	0	2	0	0	0
k141_23302_1	0	0	0	2	0	0	0
k141_23303_1	0	2	0	0	0	0	0
k141_23304_1	0	2	0	0	0	0	0
k141_23309_2	0	0	6	0	0	0	0
k141_23324_1	0	0	24	0	0	0	0
k141_23331_1	0	0	30	0	0	0	0
k141_23354_2	0	0	4	0	0	0	0
k141_23407_1	0	0	0	0	0	4	0
k141_2341_1	0	0	24	0	0	0	0
k141_23422_1	0	0	2	0	0	0	0
k141_23441_1	0	0	4	0	0	0	0
k141_23466_1	0	2	0	0	0	0	0
k141_23501_1	0	2	0	0	0	0	0
k141_23508_2	0	0	6	0	0	0	0
k141_23511_1	0	2	0	0	0	0	0
k141_23514_1	0	0	2	0	0	0	0
k141_23574_1	0	0	2	0	0	0	0
k141_2358_1	0	0	12	0	0	0	0
k141_23600_1	0	0	20	0	0	0	0
k141_23648_1	0	0	2	0	0	0	0
k141_23676_2	0	0	2	0	0	0	0
k141_2369_1	0	0	20	0	0	0	0
k141_23691_1	0	0	14	0	0	0	0
k141_237_3	0	0	0	0	0	2	0
k141_23719_1	0	0	0	0	0	2	0
k141_23738_4	0	0	0	2	0	0	0
k141_23744_1	0	0	0	0	0	2	0
k141_23749_2	0	0	2	0	0	0	0
k141_23751_1	0	0	0	2	0	0	0
k141_2380_1	0	0	16	0	0	0	0
k141_23806_1	0	2	0	0	0	0	0
k141_23813_1	0	2	0	0	0	0	0
k141_23813_2	0	0	6	0	0	0	0
k141_23828_2	0	0	4	0	0	0	0
k141_2383_1	0	0	22	0	0	0	0
k141_2383_2	0	0	4	0	0	0	0
k141_23834_1	0	0	0	0	0	0	2
k141_23850_1	0	0	10	0	0	0	0
k141_23864_1	0	0	2	0	0	0	0
k141_23865_1	0	0	6	0	0	0	0
k141_2387_1	0	0	0	0	0	2	0
k141_23875_1	0	0	0	0	0	2	0
k141_23879_1	0	0	0	0	0	0	2
k141_2389_2	0	0	8	0	0	0	0
k141_23893_1	0	0	0	0	2	0	0
k141_23911_1	0	0	6	0	0	0	0
k141_23926_1	0	0	6	0	0	0	0
k141_2393_2	0	0	2	0	0	0	0
k141_23934_1	0	2	0	0	0	0	0
k141_23962_1	0	0	0	0	0	0	2
k141_2398_1	0	0	0	0	0	4	0
k141_23992_2	0	0	8	0	0	0	0
k141_24006_2	0	0	18	0	0	0	0
k141_24034_1	0	0	10	0	0	0	0
k141_24053_1	0	0	20	0	0	0	0
k141_24075_2	0	0	14	0	0	0	0
k141_24076_1	0	0	6	0	0	0	0
k141_24076_2	0	0	20	0	0	0	0
k141_24083_2	0	0	2	0	0	0	0
k141_24089_1	0	0	8	0	0	0	0
k141_241_1	0	0	8	0	0	0	0
k141_24102_1	0	2	0	0	0	0	0
k141_24108_1	0	0	2	0	0	0	0
k141_24143_1	0	0	8	0	0	0	0
k141_2417_1	0	0	0	0	2	0	0
k141_24185_1	0	0	6	0	0	0	0
k141_24191_2	0	0	2	0	0	0	0
k141_24205_21	0	2	0	0	0	0	0
k141_24205_30	0	0	0	2	0	0	0
k141_24205_33	0	0	10	0	0	0	0
k141_24205_38	0	0	6	0	0	0	0
k141_24205_4	0	0	0	2	0	0	0
k141_24213_1	0	0	36	0	0	0	0
k141_24223_2	0	0	4	0	0	0	0
k141_24250_1	0	4	0	0	0	0	0
k141_24271_1	0	0	0	0	0	2	0
k141_24279_2	0	0	0	0	2	0	0
k141_24281_1	0	0	0	0	2	0	0
k141_24306_3	0	2	0	0	0	0	0
k141_24349_1	0	0	14	0	0	0	0
k141_24354_1	0	0	32	0	0	0	0
k141_24373_2	0	0	8	0	0	0	0
k141_24385_1	0	0	0	0	2	0	0
k141_24387_1	0	0	4	0	0	0	0
k141_2439_2	0	0	4	0	0	0	0
k141_24396_1	0	0	0	2	0	0	0
k141_24410_1	0	0	14	0	0	0	0
k141_24415_1	0	0	14	0	0	0	0
k141_24421_1	0	0	8	0	0	0	0
k141_24433_2	0	0	12	0	0	0	0
k141_24436_1	0	0	0	0	2	0	0
k141_24458_1	0	0	6	0	0	0	0
k141_24487_1	0	0	20	0	0	0	0
k141_2449_1	0	0	4	0	0	0	0
k141_24529_1	0	0	0	0	0	2	0
k141_24545_1	0	0	0	0	2	0	0
k141_24562_1	0	0	0	0	2	0	0
k141_24575_1	0	0	2	0	0	0	0
k141_24575_2	0	0	6	0	0	0	0
k141_24584_1	0	2	0	0	0	0	0
k141_24592_1	0	0	2	0	0	0	0
k141_24595_1	0	2	0	0	0	0	0
k141_24596_1	0	0	0	0	4	0	0
k141_24620_1	0	0	4	0	0	0	0
k141_24638_1	0	0	4	0	0	0	0
k141_24652_1	0	0	4	0	0	0	0
k141_24665_1	0	0	8	0	0	0	0
k141_24668_1	0	0	0	0	2	0	0
k141_24693_1	0	0	22	0	0	0	0
k141_24694_1	0	0	2	0	0	0	0
k141_24696_1	0	0	18	0	0	0	0
k141_24742_1	0	0	0	2	0	0	0
k141_24743_1	0	0	0	0	2	0	0
k141_24755_2	0	0	0	2	0	0	0
k141_24798_1	0	0	22	0	0	0	0
k141_24806_1	0	0	12	0	0	0	0
k141_2481_2	0	0	2	0	0	0	0
k141_24818_1	0	0	24	0	0	0	0
k141_24829_1	0	0	14	0	0	0	0
k141_24834_1	0	0	12	0	0	0	0
k141_24935_1	0	0	0	0	0	0	2
k141_24939_1	0	0	22	0	0	0	0
k141_24942_1	0	0	0	0	0	0	6
k141_24955_1	0	0	0	0	0	0	10
k141_24989_1	0	0	0	2	0	0	0
k141_25023_2	0	0	4	0	0	0	0
k141_25033_1	0	0	0	2	0	0	0
k141_25049_1	0	0	8	0	0	0	0
k141_25055_4	0	0	0	0	0	2	0
k141_25078_2	0	0	2	0	0	0	0
k141_25137_2	0	0	14	0	0	0	0
k141_2523_1	0	0	0	0	0	0	4
k141_25230_2	0	0	2	0	0	0	0
k141_25233_1	0	0	6	0	0	0	0
k141_25325_1	0	0	0	0	0	0	6
k141_25362_1	0	0	0	0	0	2	0
k141_25385_2	0	0	16	0	0	0	0
k141_25392_2	0	0	4	0	0	0	0
k141_25440_1	0	0	0	2	0	0	0
k141_25462_1	0	0	2	0	0	0	0
k141_25527_1	0	0	24	0	0	0	0
k141_2553_1	0	0	16	0	0	0	0
k141_25552_1	0	0	0	2	0	0	0
k141_25566_1	0	0	0	2	0	0	0
k141_25568_2	0	0	2	0	0	0	0
k141_2559_3	0	0	6	0	0	0	0
k141_25623_1	0	0	0	0	2	0	0
k141_25644_1	0	0	0	2	0	0	0
k141_25684_1	0	0	8	0	0	0	0
k141_25707_1	0	0	0	2	0	0	0
k141_25713_2	0	0	14	0	0	0	0
k141_25716_1	0	2	0	0	0	0	0
k141_25726_1	0	0	0	0	0	0	2
k141_25799_1	0	0	0	0	2	0	0
k141_25844_3	0	0	10	0	0	0	0
k141_25855_1	0	2	0	0	0	0	0
k141_25883_1	0	0	14	0	0	0	0
k141_25898_1	0	0	8	0	0	0	0
k141_25912_1	0	0	0	6	0	0	0
k141_25925_1	0	0	4	0	0	0	0
k141_2593_1	0	0	16	0	0	0	0
k141_25939_1	0	0	0	0	0	0	2
k141_2594_1	0	0	6	0	0	0	0
k141_2595_1	0	0	6	0	0	0	0
k141_25953_2	0	0	10	0	0	0	0
k141_25962_1	0	0	0	0	2	0	0
k141_25977_1	0	0	2	0	0	0	0
k141_25989_1	0	0	0	4	0	0	0
k141_26010_2	0	0	12	0	0	0	0
k141_26048_1	0	0	12	0	0	0	0
k141_26116_1	0	0	0	0	0	4	0
k141_26131_1	0	0	12	0	0	0	0
k141_26134_1	0	2	0	0	0	0	0
k141_26142_2	0	2	0	0	0	0	0
k141_26188_1	0	0	0	0	0	0	4
k141_26244_1	0	2	0	0	0	0	0
k141_26268_1	0	0	4	0	0	0	0
k141_26279_5	0	0	0	0	2	0	0
k141_26293_1	0	2	0	0	0	0	0
k141_26293_4	0	0	0	0	0	2	0
k141_26293_5	0	0	0	0	0	2	0
k141_26298_1	0	2	0	0	0	0	0
k141_26313_1	0	2	0	0	0	0	0
k141_26330_6	0	0	0	2	0	0	0
k141_26350_1	0	0	12	0	0	0	0
k141_26381_1	0	0	0	0	0	2	0
k141_26411_1	0	0	4	0	0	0	0
k141_26445_1	0	0	20	0	0	0	0
k141_26446_1	0	0	2	0	0	0	0
k141_26457_1	0	2	0	0	0	0	0
k141_2649_1	0	0	2	0	0	0	0
k141_2649_2	0	0	16	0	0	0	0
k141_26499_1	0	2	0	0	0	0	0
k141_26512_1	0	0	26	0	0	0	0
k141_26537_1	0	0	2	0	0	0	0
k141_26672_1	0	0	60	0	0	0	0
k141_26742_1	0	0	0	0	2	0	0
k141_26826_2	0	0	0	2	0	0	0
k141_26835_1	0	0	0	2	0	0	0
k141_26836_1	0	0	0	0	0	4	0
k141_26842_1	0	0	0	0	2	0	0
k141_26843_2	0	0	0	0	2	0	0
k141_26895_2	0	0	0	2	0	0	0
k141_26990_1	0	0	0	0	0	2	0
k141_2700_1	0	0	24	0	0	0	0
k141_27012_1	0	0	8	0	0	0	0
k141_27030_2	0	0	0	0	0	0	4
k141_27052_1	0	0	0	0	0	0	2
k141_27097_1	0	0	0	0	0	2	0
k141_271_1	0	0	0	4	0	0	0
k141_2714_1	0	0	4	0	0	0	0
k141_2714_2	0	0	24	0	0	0	0
k141_27165_1	0	0	50	0	0	0	0
k141_27199_2	0	0	0	0	0	2	0
k141_27245_1	0	0	14	0	0	0	0
k141_27260_1	0	2	0	0	0	0	0
k141_27263_1	0	0	18	0	0	0	0
k141_2729_1	0	0	2	0	0	0	0
k141_27300_1	0	0	4	0	0	0	0
k141_27318_2	0	2	0	0	0	0	0
k141_27325_1	0	0	4	0	0	0	0
k141_27359_1	0	0	12	0	0	0	0
k141_27375_1	0	0	0	2	0	0	0
k141_27379_1	0	2	0	0	0	0	0
k141_27384_1	0	0	0	0	2	0	0
k141_27387_1	0	0	0	0	2	0	0
k141_27395_2	0	0	4	0	0	0	0
k141_27432_1	0	0	8	0	0	0	0
k141_27441_1	0	0	2	0	0	0	0
k141_27455_1	0	0	18	0	0	0	0
k141_27482_1	0	0	0	0	2	0	0
k141_27494_1	0	0	2	0	0	0	0
k141_27494_2	0	0	30	0	0	0	0
k141_27529_1	0	0	6	0	0	0	0
k141_27543_1	0	0	0	2	0	0	0
k141_27558_1	0	0	0	0	0	2	0
k141_27567_1	0	0	6	0	0	0	0
k141_27573_1	0	0	0	2	0	0	0
k141_27586_1	0	0	0	2	0	0	0
k141_27639_1	0	0	6	0	0	0	0
k141_27656_1	0	0	2	0	0	0	0
k141_27661_1	0	0	0	4	0	0	0
k141_27663_1	0	0	20	0	0	0	0
k141_27685_1	0	0	0	0	2	0	0
k141_27690_1	0	0	12	0	0	0	0
k141_27692_1	0	0	0	0	0	2	0
k141_27698_1	0	2	0	0	0	0	0
k141_27722_1	0	0	8	0	0	0	0
k141_27727_1	0	0	16	0	0	0	0
k141_27762_1	0	0	20	0	0	0	0
k141_27783_2	0	2	0	0	0	0	0
k141_27785_1	0	0	0	0	2	0	0
k141_27786_1	0	0	46	0	0	0	0
k141_2782_1	0	0	10	0	0	0	0
k141_27822_2	0	2	0	0	0	0	0
k141_27827_1	0	0	0	2	0	0	0
k141_27844_1	0	0	28	0	0	0	0
k141_2785_1	0	0	2	0	0	0	0
k141_2787_2	0	0	0	0	0	0	2
k141_27879_1	0	0	4	0	0	0	0
k141_27879_2	0	0	26	0	0	0	0
k141_27902_1	0	0	68	0	0	0	0
k141_27931_1	0	2	0	0	0	0	0
k141_27932_1	0	0	14	0	0	0	0
k141_27934_2	0	0	20	0	0	0	0
k141_27948_1	0	0	4	0	0	0	0
k141_2795_1	0	4	0	0	0	0	0
k141_2802_2	0	0	48	0	0	0	0
k141_28036_1	0	0	2	0	0	0	0
k141_28144_1	0	0	0	0	0	2	0
k141_28165_2	0	0	2	0	0	0	0
k141_28170_1	0	0	0	0	0	4	0
k141_28183_1	0	0	10	0	0	0	0
k141_28192_1	0	0	6	0	0	0	0
k141_28194_1	0	0	0	2	0	0	0
k141_28213_1	0	0	6	0	0	0	0
k141_28243_1	0	0	0	0	0	0	6
k141_28250_1	0	2	0	0	0	0	0
k141_28345_1	0	0	20	0	0	0	0
k141_28358_1	0	2	0	0	0	0	0
k141_28359_1	0	0	2	0	0	0	0
k141_28384_1	0	0	24	0	0	0	0
k141_28384_2	0	0	6	0	0	0	0
k141_28386_2	0	0	20	0	0	0	0
k141_28388_1	0	0	0	0	2	0	0
k141_28404_1	0	0	18	0	0	0	0
k141_28415_1	0	0	0	2	0	0	0
k141_28435_1	0	0	18	0	0	0	0
k141_28438_2	0	0	20	0	0	0	0
k141_2845_1	0	0	0	0	4	0	0
k141_28452_1	0	0	0	0	0	0	4
k141_28461_1	0	2	0	0	0	0	0
k141_28475_1	0	0	8	0	0	0	0
k141_28514_2	0	0	10	0	0	0	0
k141_28584_1	0	2	0	0	0	0	0
k141_28610_1	0	0	2	0	0	0	0
k141_28616_1	0	0	6	0	0	0	0
k141_28616_2	0	0	2	0	0	0	0
k141_28617_1	0	0	0	2	0	0	0
k141_2862_1	0	0	4	0	0	0	0
k141_2863_2	0	0	10	0	0	0	0
k141_28636_1	0	0	0	0	2	0	0
k141_28656_1	0	0	10	0	0	0	0
k141_2867_2	0	0	14	0	0	0	0
k141_28702_1	0	0	0	0	0	0	2
k141_28704_1	0	0	12	0	0	0	0
k141_28730_1	0	0	16	0	0	0	0
k141_28738_1	0	0	4	0	0	0	0
k141_28746_1	0	0	4	0	0	0	0
k141_28767_1	0	0	6	0	0	0	0
k141_28783_1	0	0	10	0	0	0	0
k141_28797_1	0	0	12	0	0	0	0
k141_28801_1	0	0	26	0	0	0	0
k141_28814_1	0	0	4	0	0	0	0
k141_28814_2	0	0	14	0	0	0	0
k141_28817_1	0	0	0	0	2	0	0
k141_28823_1	0	0	18	0	0	0	0
k141_28823_2	0	0	6	0	0	0	0
k141_28855_1	0	0	0	0	2	0	0
k141_28865_1	0	0	16	0	0	0	0
k141_28872_1	0	0	0	0	2	0	0
k141_28877_1	0	0	24	0	0	0	0
k141_28886_1	0	0	8	0	0	0	0
k141_28887_2	0	0	24	0	0	0	0
k141_28898_1	0	0	26	0	0	0	0
k141_28902_2	0	0	16	0	0	0	0
k141_28920_1	0	2	0	0	0	0	0
k141_28920_11	0	0	0	0	0	2	0
k141_28920_9	0	0	0	0	0	2	0
k141_28936_1	0	0	12	0	0	0	0
k141_2894_1	0	0	0	0	0	0	2
k141_28949_1	0	0	12	0	0	0	0
k141_28949_2	0	0	2	0	0	0	0
k141_28959_1	0	0	0	0	0	2	0
k141_28961_1	0	0	0	0	2	0	0
k141_28963_1	0	2	0	0	0	0	0
k141_28969_1	0	0	2	0	0	0	0
k141_28987_2	0	0	0	2	0	0	0
k141_28990_1	0	0	0	6	0	0	0
k141_28994_1	0	0	2	0	0	0	0
k141_29015_1	0	0	0	0	0	2	0
k141_29028_1	0	2	0	0	0	0	0
k141_29051_2	0	0	10	0	0	0	0
k141_29079_1	0	0	34	0	0	0	0
k141_29123_2	0	0	0	0	2	0	0
k141_29130_2	0	0	2	0	0	0	0
k141_29151_1	0	0	8	0	0	0	0
k141_29189_1	0	0	0	2	0	0	0
k141_29209_1	0	0	20	0	0	0	0
k141_29235_1	0	0	20	0	0	0	0
k141_29241_1	0	0	2	0	0	0	0
k141_29246_1	0	0	0	0	2	0	0
k141_29263_1	0	0	16	0	0	0	0
k141_29274_1	0	2	0	0	0	0	0
k141_29295_21	0	0	0	0	0	4	0
k141_29295_32	0	0	0	0	2	0	0
k141_29295_38	0	0	0	0	2	0	0
k141_29295_4	0	0	0	2	0	0	0
k141_29295_41	0	0	0	0	0	2	0
k141_29295_45	0	2	0	0	0	0	0
k141_29295_50	0	0	0	0	0	2	0
k141_29295_56	0	0	0	0	2	0	0
k141_29295_58	0	0	0	0	0	4	0
k141_29295_6	0	2	0	0	0	0	0
k141_29295_65	0	0	0	0	2	0	0
k141_29295_75	0	0	14	0	0	0	0
k141_29295_8	0	0	2	0	0	0	0
k141_29295_91	0	8	0	0	0	0	0
k141_29295_97	0	0	0	2	0	0	0
k141_29295_99	0	2	0	0	0	0	0
k141_29314_1	0	0	4	0	0	0	0
k141_2932_6	0	0	0	0	0	2	0
k141_29337_1	0	0	0	0	2	0	0
k141_29374_1	0	2	0	0	0	0	0
k141_2940_1	0	0	0	2	0	0	0
k141_29403_1	0	0	0	2	0	0	0
k141_29405_1	0	2	0	0	0	0	0
k141_2942_1	0	0	8	0	0	0	0
k141_29444_2	0	0	4	0	0	0	0
k141_29457_1	0	0	0	6	0	0	0
k141_29467_1	0	0	18	0	0	0	0
k141_29481_1	0	0	4	0	0	0	0
k141_29488_1	0	0	0	0	0	2	0
k141_29500_1	0	0	18	0	0	0	0
k141_29544_1	0	0	0	0	2	0	0
k141_29567_1	0	0	16	0	0	0	0
k141_29569_1	0	0	8	0	0	0	0
k141_29597_2	0	0	8	0	0	0	0
k141_29611_1	0	0	0	0	4	0	0
k141_29614_2	0	0	4	0	0	0	0
k141_29618_1	0	0	0	2	0	0	0
k141_29631_1	0	0	2	0	0	0	0
k141_29631_2	0	0	8	0	0	0	0
k141_29651_1	0	0	4	0	0	0	0
k141_29654_1	0	0	0	2	0	0	0
k141_29662_2	0	0	8	0	0	0	0
k141_29673_1	0	0	0	0	2	0	0
k141_29674_1	0	0	4	0	0	0	0
k141_29699_2	0	0	28	0	0	0	0
k141_2970_1	0	0	12	0	0	0	0
k141_29716_2	0	0	22	0	0	0	0
k141_29719_1	0	0	0	2	0	0	0
k141_29721_2	0	0	2	0	0	0	0
k141_29721_3	0	0	18	0	0	0	0
k141_29725_1	0	0	0	0	0	2	0
k141_29751_1	0	0	32	0	0	0	0
k141_29758_1	0	0	24	0	0	0	0
k141_29760_1	0	0	2	0	0	0	0
k141_29822_5	0	0	0	0	2	0	0
k141_29822_9	0	0	0	2	0	0	0
k141_29840_2	0	0	2	0	0	0	0
k141_29865_3	0	0	8	0	0	0	0
k141_29903_1	0	0	4	0	0	0	0
k141_29903_2	0	0	26	0	0	0	0
k141_29903_3	0	0	2	0	0	0	0
k141_29946_1	0	0	8	0	0	0	0
k141_29988_1	0	0	0	4	0	0	0
k141_30018_1	0	0	0	0	2	0	0
k141_3004_1	0	0	42	0	0	0	0
k141_30077_1	0	2	0	0	0	0	0
k141_30088_1	0	0	14	0	0	0	0
k141_30103_1	0	0	10	0	0	0	0
k141_30104_1	0	0	2	0	0	0	0
k141_30121_1	0	2	0	0	0	0	0
k141_30126_1	0	0	0	0	0	2	0
k141_30135_1	0	0	0	0	0	2	0
k141_30135_2	0	0	0	0	0	4	0
k141_30135_3	0	0	6	0	0	0	0
k141_30142_2	0	0	2	0	0	0	0
k141_30199_2	0	0	0	0	2	0	0
k141_302_2	0	0	4	0	0	0	0
k141_302_3	0	0	18	0	0	0	0
k141_30205_10	0	0	0	2	0	0	0
k141_30205_18	0	0	0	0	2	0	0
k141_30205_2	0	0	0	0	0	2	0
k141_30205_30	0	0	0	0	0	2	0
k141_30205_37	0	0	0	0	0	2	0
k141_30205_38	0	0	0	0	0	2	0
k141_30205_47	0	0	6	0	0	0	0
k141_30205_8	0	0	0	0	0	6	0
k141_30209_3	0	0	0	0	2	0	0
k141_3021_1	0	0	32	0	0	0	0
k141_3022_1	0	0	42	0	0	0	0
k141_3024_1	0	0	16	0	0	0	0
k141_30248_1	0	0	20	0	0	0	0
k141_30335_1	0	0	8	0	0	0	0
k141_30335_2	0	0	4	0	0	0	0
k141_30344_1	0	0	10	0	0	0	0
k141_30344_2	0	0	8	0	0	0	0
k141_30346_1	0	0	12	0	0	0	0
k141_30381_2	0	2	0	0	0	0	0
k141_30399_1	0	0	0	0	0	0	2
k141_30413_2	0	0	0	2	0	0	0
k141_30446_1	0	0	2	0	0	0	0
k141_30486_1	0	0	0	4	0	0	0
k141_30489_1	0	0	2	0	0	0	0
k141_30499_1	0	0	14	0	0	0	0
k141_305_1	0	0	0	2	0	0	0
k141_30512_1	0	0	18	0	0	0	0
k141_30512_2	0	0	14	0	0	0	0
k141_3053_1	0	0	0	4	0	0	0
k141_30535_1	0	0	10	0	0	0	0
k141_30541_1	0	0	42	0	0	0	0
k141_30549_1	0	4	0	0	0	0	0
k141_30555_2	0	0	8	0	0	0	0
k141_30565_1	0	0	4	0	0	0	0
k141_30565_2	0	0	4	0	0	0	0
k141_30577_1	0	0	4	0	0	0	0
k141_30577_2	0	0	14	0	0	0	0
k141_30581_1	0	0	0	0	2	0	0
k141_30600_1	0	0	4	0	0	0	0
k141_30600_2	0	0	6	0	0	0	0
k141_30600_3	0	0	2	0	0	0	0
k141_30613_1	0	0	0	2	0	0	0
k141_30624_1	0	0	0	0	8	0	0
k141_30661_3	0	0	0	0	0	0	16
k141_30681_1	0	0	0	0	0	6	0
k141_30780_1	0	0	30	0	0	0	0
k141_30796_2	0	0	26	0	0	0	0
k141_3080_1	0	4	0	0	0	0	0
k141_30806_2	0	0	6	0	0	0	0
k141_30825_1	0	0	0	0	0	8	0
k141_30848_1	0	0	0	0	0	0	2
k141_30867_1	0	0	0	2	0	0	0
k141_3087_1	0	0	8	0	0	0	0
k141_30884_1	0	0	0	0	6	0	0
k141_3089_1	0	2	0	0	0	0	0
[truncated: 12,201 more rows]

## Sheet: Supplementary Table S6
Supplementary Table S6 Gut microbial metatranscriptomic reference gene catalog
gene id	N	C1	C2	C3	C4	C5	C6
mix_4278_3	0	0	9	0	0	0	0
mix_3721_1	0	0	0	16	0	13	0
mix_477_26	0	0	0	3	0	1	0
mix_10294_1	0	0	0	15	0	0	0
mix_3151_1	0	9	14	0	0	0	0
mix_23600_1	0	21	0	0	0	0	0
mix_13436_2	0	0	0	0	36	0	0
mix_22756_1	0	0	0	1	0	0	0
mix_16205_2	0	0	0	3	33	1	1
mix_1991_6	0	0	8	0	0	0	0
mix_3330_1	0	25	0	0	0	0	0
mix_5275_1	0	0	0	0	70	0	0
mix_5458_3	0	0	0	0	0	1	0
mix_2488_1	0	0	0	5	0	0	0
mix_4983_1	0	0	2	5	0	7	3
mix_16347_1	0	0	0	4	0	0	0
mix_3304_1	0	0	0	0	0	4	0
mix_8770_1	0	35	0	3	0	5	0
mix_14666_1	0	8	0	0	0	0	0
mix_16797_2	0	0	0	1	0	0	0
mix_716_2	0	0	0	1	0	0	0
mix_493_2	0	0	0	0	0	1	1
mix_1097_8	0	23	0	3	0	0	1
mix_5248_3	0	0	0	1	0	0	0
mix_947_2	0	0	0	20	0	0	0
mix_17504_1	0	14	0	0	0	2	17
mix_1002_3	0	0	0	1	0	0	1
mix_8213_1	0	0	0	0	28	0	0
mix_6245_9	0	0	0	0	0	1	0
mix_3052_2	0	0	0	0	28	0	0
mix_271_1	0	3	0	3	0	1	1
mix_420_1	0	0	0	23	0	0	15
mix_525_3	0	0	0	0	23	0	0
mix_13601_1	0	0	0	0	0	0	10
mix_20753_1	0	0	0	0	0	0	1
mix_22800_1	0	0	0	9	0	0	0
mix_523_1	0	0	0	12	0	5	0
mix_3491_1	0	0	1	1	0	0	0
mix_2908_1	0	0	1	0	0	0	0
mix_7271_1	0	0	0	0	0	1	0
mix_2476_3	0	1	0	0	0	0	0
mix_2000_1	0	0	0	9	0	0	11
mix_23411_1	0	21	0	0	0	0	11
mix_17012_2	0	0	0	1	0	0	1
mix_3620_4	0	0	0	7	0	0	0
mix_2629_2	0	0	0	8	0	0	0
mix_13172_1	0	0	0	0	0	0	16
mix_3318_2	0	0	0	0	0	0	33
mix_7318_1	0	8	0	0	0	0	0
mix_5804_5	0	0	0	4	0	0	0
mix_9354_1	0	0	0	7	0	0	0
mix_4180_3	0	0	0	1	1	0	0
mix_3219_6	0	0	0	6	0	0	0
mix_23660_1	0	0	0	0	0	9	0
mix_5490_2	0	1	17	0	0	0	0
mix_930_1	0	0	0	5	0	0	0
mix_12288_1	0	0	0	0	0	1	0
mix_21533_1	0	0	0	0	12	0	0
mix_488_2	0	0	0	0	11	0	0
mix_3296_6	0	0	0	1	9	0	0
mix_1651_1	0	0	0	1	14	1	2
mix_3176_2	0	0	0	32	17	0	0
mix_778_2	0	0	0	1	17	1	0
mix_24784_1	0	0	0	12	0	0	0
mix_7439_2	0	0	0	2	0	0	1
mix_1845_1	0	37	0	0	0	4	0
mix_16356_1	0	0	0	0	0	5	0
mix_5618_1	0	0	30	0	0	0	0
mix_2207_1	0	0	0	8.43	9.97	0	0
mix_13762_1	0	0	2	0	0	0	0
mix_846_1	0	0	0	0	0	0	2
mix_17649_1	0	0	21	0	0	0	0
mix_3347_1	0	0	0	0	0	1	0
mix_2763_4	0	0	0	1	0	0	0
mix_3992_1	0	0	0	0	0	2	0
mix_13425_1	0	6	0	0	0	0	0
mix_1566_1	0	0	0	9	0	12	23
mix_5560_1	0	0	2	79	1	111	21
mix_10019_1	0	0	0	7	0	0	0
mix_2545_1	0	0	0	0	0	1	0
mix_4271_1	0	0	0	0	0	5	0
mix_14606_1	0	0	0	7	0	0	0
mix_19982_2	0	0	0	1	0	0	0
mix_16385_1	0	0	0	0	0	10	0
mix_1809_1	0	0	0	0	29	0	1
mix_11804_1	0	0	0	0	0	5	0
mix_6613_1	0	0	0	0	0	0	6
mix_20417_1	0	0	0	0	0	1	0
mix_10839_1	0	0	0	0	0	12	0
mix_22423_1	0	0	0	1	0	0	0
mix_13235_1	0	0	0	0	0	1	0
mix_24022_1	0	0	0	0	0	0	4
mix_2110_1	0	0	0	1	0	0	0
mix_679_3	0	0	0	2	28	1	0
mix_14550_1	0	0	0	0	0	7	0
mix_6821_3	0	0	0	2	0	0	0
mix_13660_1	0	0	0	0	21	0	0
mix_9772_1	0	0	0	0	0	11	0
mix_9258_1	0	0	0	0	0	5	0
mix_4642_1	0	7	17	94	0	11	0
mix_2343_1	0	0	0	4	0	5	13
mix_2428_3	0	0	0	0	0	1	0
mix_998_3	0	0	0	1	0	0	0
mix_10356_1	0	0	0	1	0	0	0
mix_681_3	0	0	0	0	12	2	0
mix_6374_15	0	16	0	0	0	0	1
mix_16818_1	0	0	0	0	0	0	26
mix_7542_1	0	0	0	7	0	31	0
mix_16139_1	0	0	0	0	0	1	0
mix_1776_1	0	0	0	0	0	0	1
mix_4003_1	0	0	0	0	18	0	0
mix_7743_6	0	0	0	0	27	0	0
mix_2338_1	0	0	0	4	0	0	0
mix_4716_1	0	0	0	0	0	1	0
mix_22482_2	0	0	0	5	0	0	0
mix_5667_1	0	28	0	37	20	3	19
mix_5251_7	0	0	1	0	0	0	0
mix_22798_1	0	0	7	0	0	0	0
mix_2409_1	0	0	8	0	29	0	0
mix_2673_1	0	0	18	0	0	0	0
mix_3163_1	0	0	0	0	15	1	1
mix_661_1	0	0	0	0	0	0	13
mix_7188_1	0	0	0	0	0	4	0
mix_20067_1	0	0	0	0	0	0	7
mix_19640_1	0	24	0	0	0	0	0
mix_15168_1	0	12	0	0	0	0	0
mix_12232_1	0	0	0	4	0	0	0
mix_10514_1	0	0	0	0	0	4	0
mix_6436_1	0	62	91	36	105	24	116
mix_1766_2	0	0	0	0	0	1	0
mix_6424_1	0	0	0	3	0	0	0
mix_4180_1	0	0	0	1	0	0	0
mix_3486_2	0	0	0	2	0	1	2
mix_22191_1	0	0	1	0	0	0	1
mix_6245_7	0	0	1	0	0	0	0
mix_3818_1	0	0	0	38	0	41	6
mix_22395_1	0	0	0	0	23	0	0
mix_2407_2	0	0	0	1	0	0	0
mix_3995_5	0	0	0	0	1	0	0
mix_4851_1	0	1	0	0	0	0	0
mix_4705_1	0	9	0	0	24	0	0
mix_628_5	0	0	0	0	0	0	1
mix_4353_1	0	0	0	0	0	2	9
mix_4005_1	0	0	0	0	20	0	0
mix_1876_1	0	0	12	0	0	0	0
mix_2763_3	0	0	0	0	0	1	0
mix_79_5	0	0	0	1	0	0	0
mix_4215_1	0	0	0	2	0	0	0
mix_5202_1	0	0	0	0	0	13	13
mix_3076_1	0	0	0	1	0	0	0
mix_13398_1	0	0	0	0	0	1	1
mix_1783_1	0	0	14	0	0	0	0
mix_70_1	0	0	0	0	4	0	0
mix_3486_1	0	0	0	1	0	0	0
mix_15856_1	0	0	0	0	16	0	0
mix_21927_1	0	0	0	0	0	1	0
mix_1809_3	0	2	0	3	87	3	3
mix_19018_1	0	3	3	0	0	0	0
mix_1432_1	0	0	0	0	1	0	0
mix_8313_2	0	0	0	0	0	1	0
mix_15261_1	0	0	0	12	0	0	0
mix_5652_1	0	0	16	14	11	0	0
mix_2727_7	0	0	1	2	72	3	1
mix_22883_1	0	0	0	0	18	0	0
mix_3063_3	0	0	0	0	0	0	1
mix_22006_1	0	0	0	11	0	0	0
mix_435_1	0	19	0	0	0	0	0
mix_19492_1	0	0	0	1	0	0	2
mix_3414_1	0	0	0	1	0	0	1
mix_3858_1	0	0	0	0	0	2	0
mix_997_3	0	0	0	1	9	0	0
mix_3705_1	0	0	0	9	0	0	0
mix_1191_1	0	0	0	0	34	0	0
mix_3470_4	0	22	0	0	0	0	0
mix_5431_1	0	0	0	0	0	1	0
mix_21925_1	0	0	14	0	0	0	25
mix_8180_2	0	0	0	0	0	4	0
mix_7768_1	0	10	0	8	5	0	0
mix_14486_1	0	0	0	0	0	3	0
mix_2266_1	0	0	0	6	0	0	0
mix_4072_1	0	0	31	0	0	0	1
mix_21678_1	0	0	0	14	0	0	0
mix_20159_1	0	9	0	0	0	0	0
mix_2987_1	0	10	0	0	0	0	0
mix_22805_2	0	0	0	0	0	5	0
mix_656_2	0	3	0	0	0	0	0
mix_17441_1	0	0	14	0	0	0	0
mix_8628_1	0	32	0	0	0	0	0
mix_23026_1	0	0	0	0	0	2	0
mix_19414_1	0	0	0	4	0	0	0
mix_4066_3	0	0	0	0	0	1	0
mix_14385_1	0	0	11	0	0	0	0
mix_1881_1	0	5	0	0	0	0	0
mix_1762_1	0	0	0	1	0	0	1
mix_5274_1	0	0	0	0	48	0	0
mix_477_19	0	0	0	1	0	1	1
mix_8223_2	0	0	0	5	0	0	0
mix_19339_1	0	0	0	7	0	0	0
mix_7830_1	0	8	0	0	0	0	0
mix_23207_1	0	0	7	0	0	0	0
mix_533_1	0	0	0	0	0	0	8
mix_2181_1	0	0	0	0	0	0	9
mix_19168_1	0	0	0	1	0	0	0
mix_956_1	0	0	0	0	0	1	0
mix_3186_5	0	0	0	8	0	0	1
mix_3876_1	0	9	0	63	0	0	11
mix_13285_1	0	0	0	0	31	0	0
mix_16822_1	0	1	0	0	0	0	0
mix_16152_1	0	25	0	0	0	0	0
mix_4922_1	0	0	0	0	7	0	0
mix_22036_2	0	0	0	0	0	1	0
mix_776_1	0	0	0	6	0	0	0
mix_3917_1	0	0	0	0	0	16	0
mix_3296_3	0	0	0	0	0	1	0
mix_23703_1	0	0	0	0	0	1	0
mix_5779_1	0	0	0	1	0	5	0
mix_679_2	0	0	0	0	0	1	0
mix_1803_1	0	0	0	0	0	1	0
mix_7633_1	0	0	74	3040	58	3691	570
mix_6115_1	0	0	0	0	0	4.89	0
mix_10920_1	0	0	0	0	0	6	0
mix_16225_1	0	0	0	0	0	1	0
mix_3009_12	0	0	0	0	0	1	0
mix_716_1	0	1	0	1	0	0	0
mix_17_1	0	0	0	0	0	0	1
mix_3296_1	0	18	0	0	0	0	0
mix_9641_1	0	11	0	0	0	0	0
mix_13521_1	0	0	12	0	0	0	0
mix_2757_1	0	0	8	0	0	0	0
mix_24785_1	0	0	0	0	0	6	0
mix_2079_1	0	1	0	0	0	0	0
mix_22101_1	0	0	0	0	0	0	1
mix_1004_1	0	0	0	2	0	0	0
mix_6067_1	0	0	41	0	0	5	19
mix_3907_1	0	0	0	0	13	0	0
mix_905_1	0	10	0	0	0	0	0
mix_18715_1	0	5	0	0	0	0	0
mix_20449_1	0	17	0	0	0	0	0
mix_10748_1	0	0	0	0	0	0	17
mix_5305_1	0	0	7	0	0	0	0
mix_13484_2	0	0	0	13	0	0	0
mix_4588_2	0	0	0	0	0	1	0
mix_21476_1	0	0	30	0	0	0	0
mix_4729_1	0	24	8	1	24	17	2
mix_2278_1	0	0	0	3	0	8	0
mix_22540_3	0	0	0	0	0	4	0
mix_19982_1	0	0	0	1	0	0	1
mix_12668_1	0	0	0	9	0	0	0
mix_18463_2	0	0	0	4	0	0	0
mix_3280_2	0	21	0	1	17	3	0
mix_3983_1	0	0	0	1.82	0	0	0
mix_407_2	0	0	0	5	0	0	0
mix_24700_1	0	0	0	0	15	0	0
mix_3783_3	0	0	0	1	0	0	0
mix_4152_1	0	0	0	0	0	0	10
mix_4757_1	0	7	0	22	0	4	0
mix_16545_1	0	0	0	0	0	1	0
mix_6245_8	0	0	0	0	32	5	1
mix_3027_1	0	0	0	6	0	0	0
mix_20531_1	0	0	7	0	0	0	0
mix_8180_5	0	0	0	2	0	2	1
mix_14372_1	0	6	0	0	0	0	0
mix_1091_2	0	1	0	0	0	0	0
mix_2480_2	0	0	0	0	9	0	0
mix_5454_1	0	0	0	13	0	6	5
mix_493_3	0	0	0	0	0	0	12
mix_15356_1	0	0	0	0	10	0	0
mix_17319_1	0	27	0	12	0	0	0
mix_21545_1	0	20	0	0	0	0	0
mix_2890_1	0	0	0	0	0	0	28
mix_12382_1	0	0	6	0	0	0	0
mix_11291_1	0	0	0	0	8	0	0
mix_9006_1	0	0	0	0	0	0	34
mix_4285_1	0	0	0	11	0	4	0
mix_7598_1	0	0	6	0	0	0	0
mix_4396_10	0	0	0	0	0	1	0
mix_463_1	0	0	0	11	0	0	0
mix_4493_1	0	16	0	0	0	0	0
mix_15361_1	0	0	0	16	0	0	0
mix_13525_1	0	0	0	0	0	0	8
mix_5394_4	0	0	0	3	0	0	0
mix_3664_3	0	0	0	0	0	1	0
mix_10726_2	0	0	15	0	0	0	0
mix_2894_1	0	0	0	0	0	15	0
mix_10548_2	0	0	0	1	0	0	0
mix_10383_2	0	0	0	1	40	1	1
mix_22047_2	0	0	0	0	0	2	0
mix_2076_1	0	0	0	0.51	0	0	0
mix_17387_1	0	4	0	0	0	0	0
mix_3009_11	0	0	0	0	30	0	0
mix_4027_1	0	0	0	4	0	0	0
mix_20157_1	0	0	0	0	0	0	7
mix_6815_14	0	1	1	5	50	7	16
mix_1745_1	0	0	0	14	0	0	0
mix_6011_2	0	0	9	22	0	0	0
mix_10402_1	0	0	0	10	0	0	0
mix_1600_1	0	13	0	0	0	0	0
mix_8407_1	0	0	0	0	0	6	0
mix_5606_7	0	0	0	0	25	0	0
mix_17603_1	0	0	0	5	0	0	0
mix_16597_1	0	0	0	0	0	0	1
mix_3116_2	0	0	0	0	0	1	0
mix_1285_1	0	1	0	0	59	0	0
mix_5606_6	0	0	0	1	0	0	0
mix_23074_1	0	0	0	0	11	0	0
mix_20944_1	0	0	0	6	0	0	0
mix_9625_1	0	4	0	0	0	0	0
mix_9877_1	0	0	0	25	0	12	8
mix_1867_2	0	0	0	0	0	0	1
mix_3936_1	0	0	1	17	0	5	0
mix_3005_1	0	0	0	1	0	0	1
mix_6542_1	0	0	2	15	0	13	15
mix_10490_1	0	0	6	0	0	0	0
mix_13215_2	0	0	0	11	0	0	0
mix_3537_4	0	0	0	0	0	1	0
mix_989_2	0	1	0	0	0	0	1
mix_13419_1	0	0	9	0	0	0	7
mix_19378_1	0	0	0	1	0	0	0
mix_21819_1	0	0	0	18	0	0	0
mix_1687_1	0	0	0	0	0	3	0
mix_1740_1	0	0	0	7	0	0	0
mix_17899_1	0	0	0	11	0	0	0
mix_1316_1	0	0	0	0	14	0	0
mix_5209_1	0	0	0	5	1	1	1
mix_765_1	0	0	0	0	0	0	16
mix_9598_1	0	0	0	6	0	0	0
mix_652_2	0	14	0	0	0	0	0
mix_999_1	0	0	0	1	0	0	0
mix_8118_1	0	26	0	15	0	0	0
mix_3024_1	0	6	0	0	0	0	0
mix_278_1	0	0	0	9	0	0	0
mix_8106_1	0	0	0	1	0	1	0
mix_12117_1	0	0	0	9	0	0	0
mix_9478_1	0	26	0	1	0	0	0
mix_1672_1	0	0	0	0	0	0	16
mix_19201_1	0	0	0	0	0	3	0
mix_1991_1	0	0	0	0	8	3	2
mix_22015_7	0	0	0	1	0	0	0
mix_10570_1	0	0	0	13	0	0	0
mix_4438_3	0	0	0	6	20	0	0
mix_11899_1	0	0	0	0	0	6	0
mix_14995_1	0	0	12	0	0	0	0
mix_12418_1	0	0	0	0	7	0	0
mix_2002_2	0	0	0	1	38	4	1
mix_22414_1	0	0	0	6	0	0	0
mix_702_2	0	0	0	1	0	1	0
mix_4517_1	0	0	0	21	12	0	0
mix_1366_1	0	0	0	1	4	0	0
mix_5477_1	0	0	13	0	0	0	0
mix_18863_1	0	0	0	0	0	6	0
mix_22182_1	0	6	0	0	0	1	0
mix_1983_1	0	0	0	10	0	0	0
mix_760_1	0	25	0	20	0	3	0
mix_3704_5	0	0	0	3	0	2	0
mix_477_14	0	0	1	1	59	3	1
mix_23233_1	0	0	0	9	0	0	0
mix_5619_1	0	0	0	18	15	0	0
mix_16318_1	0	0	0	1	0	1	0
mix_3479_1	0	0	0	1	1	0	0
mix_5332_1	0	0	0	0	16	0	0
mix_5760_3	0	0	0	0	0	2	0
mix_20785_1	0	0	0	10	0	0	0
mix_576_1	0	0	0	11	0	0	0
mix_16626_1	0	0	0	0	6	0	0
mix_14081_1	0	0	0	0	0	0	1
mix_4347_1	0	0	0	4	0	5	0
mix_1991_4	0	1	7	3	43	2	0
mix_5491_1	0	41	5	84	45	0	0
mix_5722_2	0	0	0	0	13	0	0
mix_18952_1	0	0	0	3	0	0	0
mix_22287_4	0	0	1	0	30	0	0
mix_4851_4	0	0	0	0	0	1	0
mix_3414_2	0	0	0	2	19	0	0
mix_4286_3	0	0	0	1	0	0	1
mix_6101_3	0	0	0	0	0	2	0
mix_16851_1	0	0	0	1	0	0	0
mix_5251_8	0	0	0	0	6	1	30
mix_3364_2	0	0	0	0	41	2	0
mix_3978_4	0	0	0	7	0	0	0
mix_13544_1	0	0	0	4	0	0	0
mix_1333_1	0	0	0	0	0	13	0
mix_22389_1	0	8	0	0	0	0	0
mix_180_2	0	0	0	5	0	0	0
mix_12073_1	0	0	0	0	0	0	12
mix_4482_1	0	0	0	0	21	0	0
mix_2514_1	0	0	0	1	43	1	0
mix_3009_2	0	2	0	3	0	1	0
mix_13841_1	0	0	0	0	0	0	19
mix_2499_1	0	6	0	0	0	0	0
mix_5251_3	0	0	0	0	15	0	0
mix_22587_2	0	0	0	0	17	2	0
mix_4148_4	0	0	0	0	0	1	0
mix_10592_1	0	0	0	9	0	0	0
mix_16057_1	0	0	0	2	0	2	0
mix_12783_1	0	0	0	0	16	0	0
mix_5480_5	0	3	0	0	0	0	0
mix_19321_1	0	0	0	0	0	6	0
mix_6572_1	0	0	14	6	0	0	0
mix_16479_1	0	0	0	0	0	0	20
mix_5248_2	0	0	0	6	12	1	0
mix_1286_1	0	0	0	0	0	13	0
mix_13931_4	0	0	0	9	31	0	0
mix_3536_4	0	0	0	1	0	1	0
mix_3583_1	0	0	0	0	0	1	0
mix_3178_1	0	0	20	9	0	0	0
mix_484_2	0	14	0	0	0	0	0
mix_7691_1	0	15	0	0	0	0	0
mix_10986_1	0	0	0	1	0	0	0
mix_3129_1	0	10	21	6	0	1	29
mix_555_3	0	0	0	0	0	0	1
mix_13288_1	0	0	5	0	0	0	0
mix_2443_2	0	0	0	0	0	0	1
mix_4396_8	0	0	0	1	0	0	1
mix_8329_1	0	0	0	0	0	0	25
mix_22579_2	0	0	1	0	0	0	0
mix_14108_1	0	0	0	9	0	0	0
mix_8424_2	0	0	0	0	0	1	1
mix_5393_2	0	39	0	11	0	0	0
mix_15444_1	0	14	0	0	0	0	0
mix_24026_1	0	0	0	0	26	0	0
mix_16392_1	0	0	0	0	0	4	0
mix_23590_1	0	5	0	0	0	0	0
mix_19195_3	0	1	0	0	0	1	0
mix_1087_2	0	0	13	1	0	5	0
mix_382_1	0	0	0	6	0	0	0
mix_5071_1	0	0	0	0	0	0	2
mix_17023_1	0	0	0	0	16	0	0
mix_10050_1	0	0	17	0	0	0	0
mix_15126_1	0	6	0	0	0	0	0
mix_19237_1	0	0	15	0	0	0	0
mix_8301_1	0	0	0	0	0	0	1
mix_2282_1	0	0	13	0	0	0	0
mix_767_1	0	0	0	0	0	0	12
mix_493_1	0	0	0	0	0	1	0
mix_238_2	0	0	6	1	0	0	0
mix_4389_1	0	0	0	0	0	2	0
mix_22945_1	0	13	0	0	0	0	0
mix_11925_1	0	0	0	13	24	0	0
mix_14616_1	0	0	0	0	0	7	0
mix_10899_1	0	11	0	0	0	0	0
mix_5061_1	0	0	0	0	0	9	0
mix_1125_1	0	0	0	0	0	0	1
mix_6425_3	0	0	14	13	0	0	0
mix_6101_6	0	0	0	1	16	0	0
mix_9953_1	0	11	0	0	0	0	0
mix_19503_1	0	11	0	0	0	0	0
mix_5257_1	0	3	0	42	38	6	0
mix_17527_1	0	14	0	0	0	0	0
mix_16358_1	0	0	0	0	0	1	0
mix_5220_1	0	0	0	0	0	1	0
mix_3215_2	0	0	4	0	0	0	0
mix_3985_1	0	0	0	3	0	4	0
mix_16052_5	0	0	0	2	0	0	1
mix_717_1	0	0	0	11	0	1	0
mix_13931_3	0	0	0	0	0	1	0
mix_22028_1	0	0	0	2	0	3	1
mix_8595_1	0	0	22	0	0	0	0
mix_2661_1	0	1	0	0	0	0	0
mix_143_1	0	0	0	0	0	1	0
mix_3485_2	0	0	1	2	0	2	1
mix_1001_3	0	0	0	2	0	0	0
mix_23692_1	0	0	0	6	0	18	10
mix_4372_1	0	0	0	10	0	0	0
mix_6075_1	0	0	19	26	29	0	0
mix_5702_1	0	2	13	0	0	0	0
mix_12035_1	0	5	0	0	0	0	0
mix_16144_1	0	0	0	0	0	0	7
mix_18124_1	0	0	0	10	0	0	0
mix_3755_1	0	0	0	9	0	4	0
mix_16932_1	0	12	0	0	0	0	0
mix_15154_1	0	0	0	0	0	4	0
mix_533_5	0	0	0	0	0	1	0
mix_14366_1	0	0	0	0	6	1	0
mix_3562_1	0	0	0	0	0	0	1
mix_6829_1	0	0	0	0	46	0	0
mix_8009_1	0	0	0	0	0	0	1
mix_24843_1	0	0	0	0	0	0	17
mix_2012_1	0	0	0	9	0	0	0
mix_21388_1	0	0	0	6	0	0	0
mix_16620_1	0	0	10	0	0	0	0
mix_171_1	0	0	0	3	0	0	0
mix_3562_4	0	0	0	0	0	1	0
mix_22589_1	0	0	0	0	0	1	0
mix_24396_1	0	0	0	0	11	0	0
mix_521_1	0	0	0	0	11	0	0
mix_23673_1	0	29	0	6	0	0	0
mix_7632_1	0	2	2	16714	336	14987	2748
mix_23055_1	0	0	24	0	0	0	0
mix_18554_1	0	0	0	0	9	0	0
mix_1791_1	0	0	4	35	0	0	0
mix_2709_1	0	0	0	0	0	6	0
mix_19666_2	0	1	0	0	0	0	0
mix_1667_1	0	0	0	0	0	1	0
mix_10691_4	0	0	0	0	0	0	3
mix_22530_1	0	0	0	7	0	0	0
mix_1097_13	0	1	2	4	1	1	1
mix_9962_1	0	0	0	0	8	0	0
mix_8248_1	0	0	0	0	0	1	0
mix_37_1	0	0	0	23	0	6	0
mix_23742_1	0	0	0	0	0	7	0
mix_19267_4	0	0	0	2	0	1	0
mix_5665_1	0	0	0	3	0	24	0
mix_10261_1	0	0	0	0	0	3	0
mix_6870_1	0	10	0	0	0	0	0
mix_18988_1	0	1	0	2	42	1	0
mix_266_1	0	0	0	0	13	0	0
mix_11837_1	0	0	0	0	0	0	16
mix_1795_1	0	0	0	0	0	1	0
mix_16136_2	0	0	0	0	0	1	0
mix_9664_1	0	0	0	0	12	0	0
mix_23237_1	0	0	0	14	0	0	0
mix_10721_2	0	0	0	3	0	0	0
mix_13486_1	0	12	0	3	0	1	0
mix_8902_1	0	0	0	0	0	1	0
mix_2560_1	0	0	0	1	0	0	0
mix_18767_1	0	0	0	0	0	11	0
mix_4411_1	0	0	0	24.99	0	21.44	1
mix_3567_2	0	0	0	0	0	2	0
mix_5114_2	0	0	0	0	25	0	0
mix_13533_1	0	0	0	0	23	0	0
mix_1097_6	0	0	0	1	21	2	1
mix_2514_2	0	0	0	0	9	0	0
mix_3219_4	0	0	0	1	0	0	8
mix_96_3	0	0	13	0	0	0	0
mix_1752_1	0	0	0	0	0	2	0
mix_9844_1	0	0	0	0	0	1	0
mix_13016_1	0	0	0	0	0	5	0
mix_23474_1	0	0	18	0	0	0	0
mix_7201_1	0	0	0	0	0	12	0
mix_1152_1	0	0	11	0	0	0	0
mix_5432_2	0	0	0	0	0	0	1
mix_3269_1	0	0	0.5	0	0	0.5	0
mix_19642_1	0	0	0	4	0	0	0
mix_686_1	0	0	0	0	0	8	0
mix_6425_5	0	0	0	6	0	6	0
mix_22536_1	0	0	0	0	12	0	0
mix_1763_2	0	0	0	1	0	0	1
mix_4310_2	0	0	0	0	16	0	0
mix_12479_1	0	0	0	3	0	0	0
mix_3090_1	0	0	0	0	0	4	0
mix_19403_1	0	0	0	11	19	0	0
mix_9570_1	0	10	0	0	0	0	0
mix_2220_1	0	0	0	0	0	1	0
mix_19879_1	0	0	0	15	0	0	0
mix_12415_1	0	9	0	0	0	0	0
mix_3333_1	0	49	0	21	0	0	0
mix_980_2	0	0	0	0	34	0	0
mix_7255_1	0	0	0	0	11	0	0
mix_5441_1	0	0	0	0	0	1	0
mix_1776_3	0	0	0	1	0	0	0
mix_327_2	0	18	0	0	0	0	0
mix_17127_1	0	0	19	0	0	6	0
mix_1921_1	0	0	0	0	0	1	0
mix_4396_7	0	0	0	0	31	1	0
mix_169_1	0	0	26	0	0	0	0
mix_9116_2	0	0	0	0	0	1	0
mix_4017_1	0	0	0	1	0	0	0
mix_2027_1	0	0	0	0	0	1	0
mix_8227_1	0	0	0	0	0	0	1
mix_6245_6	0	2	0	0	29	0	1
mix_3186_2	0	0	0	0	54	1	1
mix_2077_4	0	0	0	2	13	1	1
mix_20844_1	0	0	4	0	0	0	0
mix_2811_1	0	0	0	2	0	2	0
mix_3620_1	0	0	0	0	34	0	0
mix_13464_1	0	0	0	0	0	4	0
mix_3718_1	0	0	0	0	0	19	0
mix_19793_1	0	0	0	18	0	0	0
mix_16535_1	0	0	0	9	0	0	0
mix_5143_1	0	0	0	0	0	0	3
mix_9540_1	0	26	0	5	0	0	0
mix_7208_3	0	0	0	0	0	0	1
mix_17881_1	0	0	0	0	0	5	0
mix_6617_1	0	0	14	8	15	13	0
mix_14040_1	0	0	0	6	0	0	13
mix_763_2	0	0	0	0	13	0	0
mix_13583_2	0	0	0	0	0	1	0
mix_10303_1	0	0	0	1	0	0	0
mix_8207_1	0	0	0	0	0	0	1
mix_8169_4	0	15	0	0	26	0	22
mix_1862_1	0	0	0	0	11	0	0
mix_15438_1	0	0	0	0	0	2	0
mix_2038_1	0	0	0	0	0	1	0
mix_10926_1	0	0	0	7	0	0	0
mix_13815_1	0	0	0	0	0	0	1
mix_14007_1	0	10	0	0	0	0	0
mix_2515_1	0	0	0	6	0	0	0
mix_8179_2	0	0	0	1	0	0	0
mix_5053_2	0	15	0	0	0	0	0
mix_13364_1	0	0	0	3	0	0	0
mix_405_1	0	0	0	4	0	0	0
mix_16518_1	0	1	1	0	9	0	0
mix_1651_2	0	0	0	0	0	0	1
mix_7671_1	0	0	0	0	8	0	17
mix_1558_1	0	0	0	20	0	0	0
mix_2253_1	0	33	0	29	0	0	0
mix_22692_1	0	0	0	41	0	0	0
mix_22142_1	0	0	0	2	0	0	0
mix_3149_6	0	0	0	0	37	0	0
mix_20274_1	0	0	0	0	0	8	0
mix_1782_2	0	0	0	0	0	1	0
mix_8228_1	0	0	0	1	20	0	0
mix_2115_3	0	0	0	0	0	0	13
mix_3749_1	0	0	0	24	0	0	0
mix_3704_6	0	0	0	9	0	3	0
mix_877_1	0	0	0	22	0	3	0
mix_13931_2	0	0	0	1	0	0	0
mix_477_13	0	0	0	0	0	2	1
mix_3403_1	0	0	0	2	0	0	0
mix_4396_14	0	1	0	1	0	1	1
mix_689_1	0	0	0	6	0	0	0
mix_5782_2	0	0	0	0	1	0	0
mix_5019_6	0	0	0	1	0	1	0
mix_2836_1	0	30	0	27	0	1	10
mix_21871_1	0	0	0	0	0	6	0
mix_22910_1	0	0	0	7	0	0	0
mix_13528_2	0	0	0	1	0	1	0
mix_8246_3	0	0	0	0	0	0	10
mix_9159_1	0	0	0	4	0	0	0
mix_2815_1	0	0	0	0	0	7	0
mix_3834_1	0	0	0	16	0	11	0
mix_19619_1	0	0	0	0	0	0	10
mix_8470_1	0	0	0	0	1	0	0
mix_7213_2	0	0	21	0	0	0	0
mix_1093_2	0	0	19	0	0	0	0
mix_1727_3	0	0	0	0	13	2	21
mix_4181_5	0	0	10	0	0	0	0
mix_23320_1	0	0	0	0	0	0	12
mix_4731_1	0	0	0	0	0	0	7
mix_2646_5	0	1	0	1	0	0	0
mix_4196_1	0	0	11	0	24	0	24
mix_11023_1	0	0	0	0	0	1	0
mix_2067_1	0	0	0	12	0	0	0
mix_13871_1	0	0	0	1	0	0	0
mix_2724_1	0	20	0	0	0	0	0
mix_5611_1	0	0	9	0	0	0	0
mix_4250_1	0	0	0	44	0	0	0
mix_10874_1	0	0	0	11	0	0	0
mix_6374_3	0	0	0	0	17	0	0
mix_389_1	0	0	0	0	17	0	0
mix_1991_5	0	0	9	1	41	2	0
mix_10434_1	0	1	0	0	0	0	0
mix_19393_1	0	0	0	0	0	0	9
mix_2404_2	0	0	0	1	12	0	1
mix_2560_2	0	0	0	1	39	0	0
mix_16434_1	0	0	0	6	0	0	0
mix_2005_2	0	0	0	0	0	1	0
mix_8585_1	0	0	0	0	0	9	0
mix_3486_3	0	0	0	0	1	1	0
mix_4068_1	0	0	0	17	0	0	0
mix_5692_2	0	0	0	1	0	0	16
mix_24817_1	0	0	0	5	0	1	0
mix_4035_2	0	0	0	0	15	0	0
mix_16099_1	0	12	0	0	0	0	1
mix_4820_1	0	0	90	0	0	0	0
mix_22908_1	0	0	1	0	0	0	0
mix_11130_1	0	0	0	14	0	0	0
mix_3149_4	0	0	0	1	27	2	0
mix_9536_1	0	0	0	19	0	0	0
mix_13779_1	0	0	0	1	1	0	0
mix_14475_1	0	0	10	0	0	0	0
mix_915_1	0	0	0	8	0	3	0
mix_3977_1	0	1	0	0	0	0	0
mix_3704_3	0	0	0	0	48	0	0
mix_20426_1	0	0	0	1	0	0	0
mix_7444_1	0	0	0	0	3	0	0
mix_23060_1	0	0	1	0	0	0	0
mix_19057_1	0	0	0	0	21	0	0
mix_4485_1	0	0	0	0	0	1	0
mix_2074_2	0	11	0	2	0	0	1
mix_21486_1	0	0	0	17	0	0	0
mix_24236_1	0	0	0	0	11	0	0
mix_7299_1	0	0	0	0	0	1	0
mix_12254_1	0	0	0	10	0	0	0
mix_496_2	0	0	0	0	15	0	0
mix_716_4	0	0	0	0	0	0	1
mix_12186_1	0	0	0	0	0	1	0
mix_23219_2	0	0	13	0	0	0	0
mix_19195_2	0	0	0	1	0	0	0
mix_1763_4	0	0	0	1	0	0	0
mix_325_1	0	0	0	1	0	0	0
mix_17807_1	0	11	0	0	0	0	0
mix_2390_1	0	0	141.27	7	35	1.01	0
mix_17256_1	0	0	0	8	0	0	0
mix_13213_1	0	0	0	1	0	0	0
mix_1097_11	0	1	1	1	0	2	1
mix_3611_1	0	1	0	0	17	0	1
mix_12681_1	0	0	0	7	0	0	0
mix_16168_2	0	0	0	0	1	0	0
mix_22015_1	0	0	0	1	0	1	0
mix_16340_1	0	20	0	0	0	0	0
mix_23602_1	0	0	28	0	0	0	0
mix_3021_2	0	16	0	0	0	1	0
mix_514_1	0	0	0	0	0	1	0
mix_631_2	0	0	0	10	0	7	0
mix_5001_2	0	0	0	0	9	0	0
mix_16798_1	0	3	0	0	0	0	0
mix_4217_1	0	0	0	0	0	2	0
mix_3389_2	0	1	0	0	0	1	0
mix_13485_2	0	0	0	0	0	1	0
mix_24058_1	0	0	0	7	0	0	0
mix_3228_1	0	0	0	0	8	0	0
mix_13325_1	0	0	0	0	0	0	1
mix_3470_2	0	7	0	0	0	0	0
mix_11048_1	0	0	12	0	0	0	0
mix_477_8	0	0	0	3	14	3	3
mix_2646_1	0	0	0	0	0	0	8
mix_14708_1	0	0	0	0	21	0	0
mix_5525_2	0	0	0	2	4	19	0
mix_7743_9	0	6	0	0	0	0	0
mix_5209_2	0	0	0	0	19	0	0
mix_19312_1	0	0	0	1	0	0	0
mix_2020_1	0	0	0	0	6	0	0
mix_8404_1	0	0	0	0	0	0	6
mix_5458_9	0	0	1	0	0	0	0
mix_21657_1	0	0	0	0	20	0	0
mix_8255_1	0	0	0	3	0	0	0
mix_3296_8	0	0	0	0	0	1	0
mix_1878_1	0	14	0	15	0	0	0
mix_20593_1	0	0	0	0	0	0	10
mix_9009_1	0	0	0	1	21	0	0
mix_19097_1	0	0	0	0	0	1	0
mix_19054_1	0	0	0	1	0	0	0
mix_21918_1	0	0	0	4	0	7	0
mix_3265_1	0	0	0	0	0	2	0
mix_16880_1	0	9	0	0	0	0	0
mix_770_2	0	0	0	0	0	2	0
mix_3183_1	0	0	0	6	0	1	10
mix_2718_1	0	0	0	0	0	12	0
mix_1407_1	0	0	0	0	10	0	0
mix_22364_2	0	34	0	0	0	4	0
mix_4412_1	0	0	0	68.01	0	25.56	0
mix_23735_1	0	0	0	0	0	0	10
mix_14641_1	0	0	0	0	11	0	0
mix_2384_1	0	0	0	0	27	0	0
mix_5276_1	0	0	0	0	0	0	16
mix_22015_2	0	1	1	1	57	3	2
mix_8579_2	0	0	0	1	0	0	0
mix_22172_2	0	0	19	0	0	0	0
mix_2674_1	0	0	0	3	0	0	0
mix_10379_1	0	0	0	0	0	0	1
mix_8377_1	0	0	0	0	17	0	0
mix_10343_2	0	0	0	2	0	1	0
mix_5503_4	0	0	0	0	0	1	0
mix_3230_1	0	0	0	1	0	0	0
mix_22155_1	0	0	0	0	0	1	0
mix_1783_2	0	2	0	1	0	0	0
mix_9969_1	0	0	0	0	0	7	13
mix_4790_2	0	1	0	0	0	0	0
mix_19557_1	0	0	1	1	0	0	0
mix_20032_1	0	0	0	0	21	0	0
mix_719_1	0	32	0	0	0	0	0
mix_8921_1	0	0	0	0	21	0	0
mix_20812_1	0	0	0	11	0	7	0
mix_16053_1	0	0	0	0	0	2	0
mix_20920_1	0	0	0	5	0	0	0
mix_19395_1	0	0	0	9	0	0	0
mix_4897_1	0	0	0	2	0	1	0
mix_8564_1	0	0	0	0	0	0	10
mix_3984_1	0	0	0	23.18	0	19	0
mix_4764_1	0	0	0	0	0	0	1
mix_2646_2	0	1	0	0	0	0	0
mix_4968_2	0	0	0	0	0	11	0
mix_4524_2	0	0	0	0	0	43	34
mix_5126_1	0	0	0	0	0	9	16
mix_1800_1	0	0	0	0	24	0	0
mix_5773_5	0	12	0	0	0	0	0
mix_753_1	0	0	0	24	0	0	0
mix_13131_1	0	0	0	8	0	4	0
mix_3296_9	0	0	0	0	0	1	0
mix_6374_18	0	0	0	1	29	1	0
mix_4955_1	0	0	0	1	0	0	0
mix_1713_2	0	0	0	0	32	0	0
mix_10256_1	0	0	0	1	11	2	0
mix_6012_2	0	12	0	18	0	0	0
mix_11462_1	0	19	0	0	0	0	0
mix_17131_1	0	2	0	0	0	0	0
mix_6075_2	0	0	0	0	10	0	0
mix_3955_1	0	0	0	1	0	0	0
mix_22268_2	0	0	0	1	0	0	0
mix_5790_4	0	0	0	3	0	0	0
mix_2727_3	0	0	0	1	0	0	0
mix_4898_1	0	0	0	0	1	0	28
mix_7545_1	0	0	0	0	0	0	1
mix_3364_4	0	0	2	0	0	0	0
mix_10265_1	0	0	0	0	0	1	0
mix_16321_1	0	0	0	1	0	0	0
mix_5445_1	0	9	12	34	0	5	30
mix_601_1	0	0	0	1	0	0	0
mix_4532_1	0	14	0	0	0	0	0
mix_10179_1	0	0	0	0	0	0	14
mix_17158_1	0	0	0	0	0	0	1
mix_18224_1	0	12	0	0	0	0	0
mix_4390_4	0	0	0	0	0	1	0
mix_18983_1	0	0	1	1	17	1	0
mix_2584_1	0	0	0	7	0	7	3
mix_13397_1	0	0	0	0	0	4	0
mix_18352_1	0	7	0	0	0	0	0
mix_5251_9	0	0	0	0	0	1	0
mix_3384_1	0	0	0	0	0	2	0
mix_14185_1	0	0	0	7	0	0	0
mix_22396_4	0	0	1	0	0	0	0
mix_2867_1	0	32	0	32	24	4	0
mix_12309_1	0	0	0	0	12	0	0
mix_12862_1	0	0	0	9	0	0	0
mix_3364_1	0	0	0	0	0	1	24
mix_16384_1	0	0	0	0	0	0	18
mix_676_1	0	0	13	0	22	0	0
mix_23615_1	0	0	0	0	0	4	0
mix_5222_3	0	0	0	1	0	0	0
mix_10454_1	0	10	0	0	0	0	0
mix_267_1	0	0	30	6	0	0	0
mix_19847_2	0	0	0	1	0	0	0
mix_20325_1	0	0	0	13	0	0	0
mix_1851_1	0	0	0	1	0	0	0
mix_1649_1	0	0	0	0	0	0	2
mix_9146_1	0	0	0	0	0	6	0
mix_19214_1	0	0	0	0	0	0	1
mix_5773_1	0	0	0	0	0	1	0
mix_4345_1	0	0	0	0	0	0	1
mix_3005_2	0	0	0	0	5	0	0
mix_10801_1	0	0	0	0	0	4	0
mix_6141_2	0	0	0	3	0	0	0
mix_2560_3	0	0	0	7	0	1	1
mix_15777_1	0	0	0	0	0	3	0
mix_3188_1	0	16	0	0	0	0	0
mix_2541_1	0	0	0	8	0	0	27
mix_19467_1	0	0	0	0	0	1	1
mix_11533_1	0	0	0	0	0	3	0
mix_9929_1	0	0	0	7	0	0	0
mix_16126_2	0	0	1	1	0	0	0
mix_13782_1	0	0	0	0	0	0	1
mix_10248_1	0	0	0	0	0	1	0
mix_2116_1	0	0	0	3	0	3	0
mix_477_17	0	0	0	5	21	1	1
mix_10130_1	0	0	0	0	0	4	0
mix_10593_1	0	1	1	0	0	0	0
mix_13527_2	0	0	0	1	0	2	0
mix_17685_1	0	0	0	0	0	6	0
mix_1807_2	0	0	0	0	13	0	6
mix_17950_1	0	9	0	0	0	0	0
mix_6374_1	0	0	0	0	0	7	0
mix_5088_1	0	0	0	0	0	2	2
mix_16168_1	0	0	0	1	0	0	1
mix_16126_1	0	0	0	1	0	0	0
mix_2058_1	0	0	0	0	14	0	0
mix_3293_3	0	0	0	0	9	0	0
mix_545_1	0	0	0	0	0	0	1
mix_5514_1	0	23	0	0	25	0	0
mix_2968_1	0	0	0	10	0	0	0
mix_17103_1	0	0	0	0	0	0	14
mix_11551_1	0	0	12	0	0	0	0
mix_5606_5	0	9	0	0	0	0	0
mix_21997_3	0	0	1	0	0	1	2
mix_15121_1	0	0	0	4	0	0	0
mix_10624_1	0	0	13	0	0	0	0
mix_2785_1	0	25	78	6	32	6	27
mix_13578_1	0	0	0	0	0	0	7
mix_3646_1	0	0	0	9	0	0	0
mix_5244_1	0	0	0	0	0	1	0
mix_5251_6	0	18	0	0	0	0	0
mix_11182_1	0	0	0	9	0	0	0
mix_16484_1	0	0	0	1	0	0	0
mix_79_2	0	0	0	1	0	0	0
mix_4395_1	0	0	0	1	0	0	0
mix_4600_1	0	0	0	0	0	1	6
mix_19847_1	0	1	0	1	0	0	0
mix_22489_1	0	0	0	0	1	0	0
mix_1189_1	0	0	13	0	0	0	0
mix_5511_1	0	0	0	9	33	0	0
mix_4768_1	0	0	0	0	1	0	0
mix_22255_1	0	0	0	0	10	0	0
mix_542_1	0	0	0	11	23	0	0
mix_3980_2	0	0	0	0	0	0	1
mix_20831_1	0	0	0	9	0	0	0
mix_2407_4	0	9	0	0	0	0	0
mix_4491_1	0	6	0	0	0	0	0
mix_1097_12	0	0	1	8	16	9	1
mix_5804_3	0	0	0	0	31	1	0
mix_22579_1	0	0	0	0	0	1	0
mix_16480_1	0	0	0	1	0	1	0
mix_16621_2	0	6	0	0	0	0	0
mix_3069_2	0	0	0	1	0	0	0
mix_4440_1	0	0	0	0	0	1	0
mix_23360_1	0	28	0	40	25	3	15
mix_3009_7	0	0	0	7	0	0	0
mix_72_1	0	0	0	1	0	0	0
mix_8133_1	0	0	0	0	0	1	0
mix_3995_1	0	0	0	1	0	0	0
mix_17291_1	0	0	8	0	0	0	0
mix_12991_1	0	0	0	0	0	0	17
mix_18084_1	0	0	26	0	0	0	0
mix_4286_4	0	0	0	0	16	0	0
mix_14485_1	0	0	0	0	0	1	0
mix_4868_7	0	0	0	0	0	1	0
mix_13197_1	0	1	0	0	0	0	0
mix_3414_3	0	0	0	0	15	0	0
mix_21314_1	0	0	0	0	0	0	17
mix_2030_1	0	1	0	0	0	0	0
mix_22660_1	0	0	0	10	0	0	0
mix_5830_2	0	0	0	0	0	4	0
mix_3362_1	0	0	0	8	0	0	0
mix_5740_1	0	0	0	0	0	0	8
mix_3629_1	0	13	0	0	0	0	0
mix_13213_2	0	0	0	0	40	0	0
mix_16264_1	0	0	0	3	16	0	0
mix_4375_1	0	0	0	5	0	10	0
mix_10634_1	0	0	0	1	0	0	0
mix_1825_1	0	0	0	8	0	0	0
mix_22150_1	0	0	0	1	0	1	0
mix_2327_1	0	1	7	1	0	0	0
mix_21025_1	0	0	0	0	16	0	0
mix_2105_1	0	0	0	0	0	1	0
mix_5325_9	0	0	0	1	0	0	0
mix_6414_1	0	0	0	0	20	0	0
mix_14236_1	0	0	14	0	0	0	0
mix_16857_1	0	10	0	0	0	0	0
mix_16722_1	0	28	0	0	0	0	0
mix_8357_2	0	0	0	0	0	1	0
mix_12471_1	0	0	0	0	0	3	0
mix_10767_1	0	0	0	0	27	0	0
mix_19276_2	0	0	0	0	12	0	0
mix_14895_1	0	0	8	0	0	0	0
mix_1578_1	0	0	0	0	0	0	18
mix_5729_1	0	0	0	0	0	2	0
mix_6245_14	0	0	9	1	0	1	0
mix_1323_1	0	0	0	0	0	2	1
mix_4052_4	0	0	0	0	0	0	1
mix_13614_1	0	0	0	0	1	0	0
mix_2877_1	0	0	0	18	0	3	0
mix_1664_1	0	0	0	1	0	7	0
mix_14779_1	0	0	0	0	0	3	0
mix_85_1	0	0	0	1	0	0	0
mix_6245_4	0	0	0	2	0	0	0
mix_22893_1	0	0	0	0	0	2	0
mix_373_1	0	3	0	21	0	3	0
mix_2237_1	0	0	0	0	0	0	43
mix_19242_1	0	0	0	0	12	0	0
mix_8217_1	0	1	0	0	0	0	0
mix_2407_3	0	0	0	0	19	0	0
mix_13459_1	0	0	0	7	0	0	0
mix_11038_1	0	0	0	15	0	0	0
mix_2413_1	0	0	7	0	0	2	0
mix_6682_1	0	13	0	0	0	0	0
mix_2362_1	0	0	0	0	14	0	0
mix_3143_2	0	0	0	1	0	0	0
mix_10885_1	0	11	0	0	0	0	0
mix_3875_3	0	0	0	0	1	0	0
mix_2742_1	0	0	0	0	0	4	0
mix_19276_1	0	0	0	0	35	1	0
mix_22965_1	0	0	0	0	0	1	0
mix_20977_1	0	0	0	15	0	0	0
mix_8494_1	0	0	0	1	0	0	0
mix_20368_1	0	0	0	1	0	0	0
mix_20500_1	0	0	0	3	0	0	0
mix_22386_1	0	0	0	3	0	0	0
mix_3079_1	0	0	1	0	0	0	0
mix_1925_2	0	0	0	9	0	0	0
mix_1236_1	0	0	13	0	17	0	0
mix_19246_1	0	0	0	0	12	0	0
mix_8280_1	0	0	0	1	0	2	0
mix_11736_1	0	18	0	0	0	0	0
mix_22519_1	0	0	0	0	0	0	31
mix_2262_1	0	0	0	12	0	55	43
mix_5366_2	0	32	0	27	13	15	12
mix_2115_4	0	0	0	4	0	0	0
mix_1417_1	0	0	0	7	0	6	0
mix_19099_3	0	0	0	0	0	1	0
mix_21564_1	0	0	0	0	0	0	12
mix_3419_3	0	23	0	0	0	0	0
mix_4438_1	0	22	0	0	0	0	0
mix_19273_1	0	0	0	1	0	1	0
mix_19276_5	0	0	0	0	0	1	0
mix_11758_1	0	12	0	0	0	0	0
mix_4898_2	0	7	0	0	0	1	0
mix_22303_1	0	0	0	6	29	0	0
mix_483_1	0	11	0	0	0	0	0
mix_7932_1	0	0	0	9	0	1	0
mix_11882_1	0	0	0	0	0	0	32
mix_1091_3	0	0	0	0	0	1	0
mix_1727_4	0	0	0	1	0	0	1
mix_3861_1	0	0	0	3	1	1	0
mix_22719_1	0	1	0	0	0	0	0
mix_6822_1	0	0	0	11	0	0	0
mix_22516_2	0	0	0	0	12	0	0
mix_21249_1	0	0	0	0	0	8	0
mix_6550_1	0	0	0	10	0	2	1
mix_4420_2	0	0	0	1	0	0	0
mix_3720_1	0	0	9	0	0	0	0
mix_24733_1	0	0	0	0	0	0	13
mix_1742_1	0	0	0	0	26	0	0
mix_477_10	0	0	0	0	0	1	0
mix_5110_5	0	0	0	0	0	2	0
mix_17845_1	0	0	0	22	0	0	0
mix_19681_1	0	0	0	1	0	0	0
mix_1172_2	0	13	0	0	0	0	0
mix_22230_1	0	0	0	0	0	1	0
mix_3139_4	0	0	0	1	0	0	0
mix_4915_1	0	13	0	0	0	0	0
mix_10860_1	0	0	9	0	0	0	0
mix_1807_3	0	0	0	2	0	0	0
mix_2646_6	0	0	0	1	0	0	0
mix_21820_1	0	0	0	0	28	0	0
mix_3614_1	0	0	2	0	0	0	0
mix_18930_1	0	0	0	0	0	0	12
mix_19399_2	0	0	0	3	0	0	0
mix_15956_1	0	0	0	0	5	0	0
mix_8089_1	0	0	0	0	0	1	0
mix_10491_1	0	0	0	0	0	7	0
mix_14262_1	0	0	0	0	0	0	15
mix_11689_1	0	0	0	0	16	0	0
mix_13953_1	0	0	0	1	0	0	0
mix_210_1	0	0	0	9	0	0	0
mix_21999_1	0	0	0	0	0	0	1
mix_13290_1	0	0	0	0	0	4	0
mix_1421_1	0	0	0	8	0	0	0
mix_15863_1	0	0	18	0	0	0	0
mix_5787_4	0	0	0	0	0	1	0
mix_8223_1	0	0	0	0	0	1	0
mix_5039_1	0	0	0	0	0	1.11	0
mix_11031_1	0	0	17	0	0	0	0
mix_3173_1	0	0	26	0	0	0	0
mix_3495_1	0	0	0	1	0	1	0
mix_2075_2	0	0	1	0	45	2	0
mix_7868_1	0	8	0	4	0	3	9
mix_14178_2	0	0	0	1	0	0	0
mix_8113_2	0	0	0	1	0	0	0
mix_19930_1	0	0	0	0	0	0	14
mix_10954_1	0	0	0	11	0	0	0
mix_6823_1	0	0	16	10	14	3	0
mix_18505_1	0	0	0	10	0	0	0
mix_22660_2	0	0	15	0	0	0	0
mix_618_1	0	0	0	25	0	0	18
mix_2770_1	0	0	0	11	0	1	0
mix_3492_1	0	0	0	0	0	3	0
mix_477_3	0	0	0	0	0	1	0
mix_1129_1	0	0	0	7	0	0	0
mix_19076_1	0	0	0	4	0	0	0
mix_2774_2	0	1	0	0	0	0	0
mix_14752_1	0	0	0	10	0	0	0
mix_16671_1	0	0	0	1	0	0	0
mix_1673_1	0	0	0	0	0	1	0
mix_1209_1	0	17	10	12	0	0	0
mix_1528_1	0	0	0	1	0	0	0
mix_3562_3	0	0	1	2	28	1	11
mix_8599_1	0	0	0	6	0	10	0
mix_22162_1	0	14	0	0	0	0	0
mix_6099_2	0	0	0	0	0	1	0
mix_10831_1	0	0	0	0	0	1	0
mix_10387_1	0	0	0	0	34	12	0
mix_12658_1	0	0	0	0	0	5	0
mix_247_1	0	0	1	1	0	0	0
mix_244_1	0	13	0	13	0	6	0
mix_680_1	0	0	0	1	0	2	0
mix_19107_1	0	9	0	0	0	0	0
mix_4382_1	0	0	0	7	0	52	12
mix_19293_1	0	0	0	0	0	2	0
mix_6552_1	0	25	347	8339	112	10250	2823
mix_2992_1	0	4	0	1	0	0	0
mix_1134_1	0	0	0	19	0	0	0
mix_4525_1	0	0	0	0	0	41	0
mix_2152_1	0	0	0	0	42	0	0
mix_24424_1	0	0	0	1	0	0	0
mix_8092_1	0	13	0	14	32	0	0
mix_7973_1	0	9	0	5	11	0	0
mix_22081_1	0	0	16	0	0	0	0
mix_2918_1	0	0	0	89	28	0	0
mix_10595_1	0	21	0	13	0	10	0
mix_22469_1	0	0	0	34	1	0	0
mix_12576_1	0	0	0	0	0	6	0
mix_1448_1	0	3	0	22	0	0	0
mix_13491_1	0	0	0	0	0	1	0
mix_19152_1	0	1	0	0	0	0	0
mix_3125_1	0	0	56	3	103	4	16
mix_1864_2	0	0	0	1	0	0	0
mix_13313_1	0	0	0	1	0	0	0
mix_15940_1	0	0	23	0	0	0	0
mix_2058_3	0	0	0	2	0	0	0
mix_21110_1	0	0	0	15	0	0	0
mix_10510_1	0	0	0	0	0	0	14
mix_462_1	0	1	0	0	0	0	0
mix_16424_1	0	0	0	1	1	0	0
mix_14110_1	0	0	13	0	0	0	0
mix_16997_1	0	0	0	0	0	2	0
mix_2203_1	0	0	16	0	0	5	0
mix_13442_2	0	0	0	9	0	0	0
mix_20333_1	0	0	0	0	0	0	5
mix_4301_2	0	0	0	0	23	0	0
mix_3555_1	0	7	0	0	0	4	1
mix_4851_5	0	16	0	0	0	0	0
mix_23124_1	0	0	0	7	0	0	0
mix_6425_4	0	42	0	22	0	0	0
mix_5121_2	0	0	41	0	0	0	0
mix_1645_1	0	0	15	0	0	0	21
mix_5458_4	0	0	0	1	0	0	0
mix_9807_1	0	0	0	0	0	4	0
mix_10792_1	0	0	0	3	0	0	0
mix_1275_1	0	0	0	11	0	0	0
mix_19591_2	0	0	0	0	0	2	0
mix_6247_2	0	0	0	0	17	0	1
mix_907_1	0	7	0	0	0	0	0
mix_4172_2	0	7	0	3	16	1	2
mix_4391_1	0	0	0	0	0	0	1
mix_3149_3	0	0	0	0	10	0	0
mix_11865_1	0	0	0	0	0	5	0
mix_8743_1	0	19	0	0	0	9	0
mix_18700_1	0	0	0	16	0	0	0
mix_1414_1	0	0	15	0	0	0	0
mix_3158_1	0	0	0	10	0	0	0
mix_7213_4	0	0	1	0	0	0	0
mix_13703_1	0	0	0	0	0	0	1
mix_4209_1	0	0	0	1	6	0	0
mix_332_1	0	0	0	11	0	0	0
mix_1109_2	0	0	0	0	17	0	0
mix_16036_2	0	0	0	0	1	0	0
mix_10327_1	0	0	0	4	0	0	0
mix_9504_1	0	0	0	0	0	3	0
mix_3537_3	0	1	0	1	0	0	0
mix_15083_1	0	0	0	5	0	0	0
mix_12635_1	0	0	0	0	0	3	0
mix_6153_2	0	1	0	1	0	1	0
mix_1097_7	0	0	0	0	0	1	0
mix_113_1	0	27	0	6	0	0	0
mix_1734_1	0	0	0	0	0	0	12
mix_4187_1	0	0	0	0	0	3	0
mix_1839_1	0	0	0	0	0	0	7
mix_22284_1	0	0	7	0	0	0	0
mix_3318_1	0	0	13	2	0	0	0
mix_477_16	0	0	0	1	57	1	0
mix_1610_1	0	0	44	0	0	0	0
mix_21996_1	0	0	0	0	24	1	0
mix_8323_1	0	0	0	3	0	0	0
mix_3359_1	0	0	0	0	0	1	0
mix_13668_1	0	0	0	10	0	0	0
mix_1982_1	0	0	0	8	0	7	0
mix_6142_1	0	0	1	1	0	0	0
mix_9157_1	0	1	0	0	0	0	0
mix_744_1	0	0	0	0	0	4	0
mix_5251_4	0	0	0	1	0	1	0
mix_2373_3	0	0	0	0	0	0	16
mix_19189_1	0	0	0	0	0	1	0
mix_13285_2	0	0	0	0	15	0	0
mix_2114_1	0	0	0	2	0	0	0
mix_2249_1	0	0	0	0	0	0	36
mix_3627_1	0	0	0	0	0	6	0
mix_3637_1	0	0	9	0	0	0	0
mix_5830_4	0	0	0	0	0	1	0
mix_477_5	0	1	0	3	1	3	3
mix_2474_1	0	0	0	48	0	0	0
mix_9829_1	0	0	0	0	0	2	0
mix_3328_1	0	0	0	0	1	1	0
mix_11126_1	0	6	0	0	0	0	0
mix_2002_1	0	0	0	6	8	0	15
mix_19194_3	0	1	0	1	59	2	6
mix_3509_2	0	0	0	0	0	0	3
mix_3022_3	0	0	0	10	0	0	0
mix_1763_3	0	1	13	0	0	2	0
mix_22509_1	0	0	0	0	0	3	0
mix_2682_1	0	14	0	0	0	0	0
mix_22720_1	0	0	0	12	0	0	0
mix_8253_1	0	0	10	0	0	1	0
mix_13213_3	0	0	0	7	0	0	0
mix_1699_1	0	0	0	0	0	0	1
mix_9843_1	0	6	0	0	0	0	0
mix_2727_4	0	0	0	0	21	1	19
mix_6101_5	0	0	0	1	30	1	0
mix_2542_1	0	0	0	0	15	0	0
mix_5804_1	0	0	0	0	14	0	0
mix_4216_1	0	0	16	0	0	0	0
mix_4851_3	0	0	0	0	1	0	0
mix_10281_1	0	0	0	9	0	0	0
mix_4284_1	0	0	0	1	26	0	0
mix_19218_1	0	15	0	0	0	0	0
mix_24697_1	0	0	0	0	0	3	0
mix_3977_2	0	0	0	0	13	0	0
mix_13335_1	0	0	0	0	17	0	0
mix_16231_2	0	0	0	0	20	1	0
mix_4685_1	0	21	14	6	0	0	12
mix_16035_4	0	0	0	2	0	0	0
mix_3375_1	0	0	0	0	0	1	0
mix_15660_1	0	0	0	0	0	6	0
mix_3235_1	0	0	0	0	39	3	1
mix_11676_1	0	0	0	5	0	0	0
mix_23685_1	0	0	0	0	0	0	14
mix_1167_1	0	0	0	0	0	0	20
mix_3049_2	0	0	0	0	0	1	0
mix_620_1	0	0	0	0	19	0	0
mix_5780_2	0	0	1	1	0	0	0
mix_17025_1	0	0	0	0	0	1	0
mix_16123_1	0	0	0	0	25	0	0
mix_4518_2	0	12	0	40	0	0	15
mix_11576_1	0	0	0	0	0	2	0
mix_17513_1	0	15	0	0	0	0	0
mix_2074_1	0	0	0	1.49	0	0	1
mix_2046_1	0	0	0	15	0	0	0
mix_3186_1	0	0	0	1	0	0	0
mix_22246_1	0	0	0	0	0	0	1
mix_14930_1	0	0	14	0	0	0	0
mix_2520_1	0	0	0	0	9	0	0
mix_18133_1	0	22	0	0	0	0	0
mix_4278_1	0	0	0	1	0	0	24
mix_24493_1	0	0	0	0	0	7	0
mix_3365_1	0	0	0	0	0	6	0
mix_5827_1	0	0	0	0	0	8	0
mix_13586_1	0	0	0	0	0	2	0
mix_3009_5	0	0	0	1	0	0	0
mix_1991_3	0	0	0	0	0	1	0
mix_16026_1	0	0	0	0	0	0	21
mix_9961_1	0	0	0	0	23	0	0
mix_1138_1	0	0	0	1	0	0	0
mix_5661_1	0	7	23	1	0	0	9
mix_11919_1	0	0	13	0	0	0	0
mix_9081_2	0	0	0	1	0	0	0
mix_5813_4	0	0	0	0	0	0	24
mix_22872_1	0	14	0	0	0	0	0
mix_16000_1	0	12	0	0	0	0	0
mix_440_1	0	0	0	0	19	1	0
mix_24284_1	0	7	0	0	0	0	0
mix_3886_1	0	0	0	6	0	0	0
mix_482_1	0	0	0	0	26	0	0
mix_16049_14	0	0	0	0	0	1	0
mix_19869_1	0	0	11	0	0	0	0
mix_12563_1	0	0	0	6	0	0	0
mix_16228_2	0	1	0	1	0	2	1
mix_2055_1	0	0	21	0	14	0	0
mix_18984_2	0	0	0	1	0	0	0
mix_4470_1	0	0	0	4	0	2	0
mix_6341_1	0	0	0	0	14	0	0
mix_19159_1	0	0	12	0	0	0	0
mix_10424_1	0	0	0	1	0	0	0
mix_2068_1	0	0	0	1	1	0	0
mix_7408_1	0	10	70	10	92	0	15
mix_441_1	0	0	0	0	0	1	0
mix_3383_1	0	0	0	4	0	1	0
mix_3863_1	0	0	16	0	0	0	0
mix_20319_1	0	9	0	0	0	0	0
mix_22064_2	0	0	0	0	0	2	0
mix_7589_1	0	0	0	5	0	0	0
mix_6821_2	0	0	0	8	0	0	0
mix_4963_1	0	0	0	0	23	0	0
mix_14600_1	0	4	0	0	0	0	0
mix_5211_2	0	0	29	0	0	0	0
mix_3295_1	0	0	0	2	0	0	0
mix_3816_1	0	0	0	30	0	0	0
mix_24357_1	0	21	0	0	0	0	0
mix_10038_1	0	0	0	0	0	3	0
mix_4395_3	0	0	0	2	0	0	2
mix_2462_1	0	0	0	36	0	12	0
mix_3555_4	0	0	0	1	63	4	21
mix_12172_1	0	0	9	0	0	0	0
mix_20104_1	0	0	0	11	0	0	0
mix_1285_2	0	1	0	0	0	0	0
mix_23254_1	0	0	0	0	0	0	17
mix_5110_3	0	0	0	0	0	1	0
mix_22254_1	0	15	0	0	0	0	0
mix_10413_1	0	0	0	1	0	0	0
mix_3163_2	0	0	0	0	0	1	0
mix_8277_3	0	1	0	0	0	0	0
mix_18315_1	0	0	0	0	0	5	0
mix_11139_1	0	0	0	1	0	0	0
mix_1986_1	0	0	0	1	0	0	0
mix_2898_1	0	0	0	0	0	9	0
mix_10844_1	0	0	0	0	0	1	0
mix_12202_1	0	28	0	53	0	0	0
mix_4756_1	0	0	0	6	0	0	0
mix_847_1	0	0	19	0	0	0	0
mix_11378_1	0	0	0	0	0	3	0
mix_4763_1	0	0	0	5	0	0	0
mix_14653_1	0	0	0	0	19	0	0
mix_13272_1	0	0	0	0	1	0	0
mix_6099_3	0	0	0	0	19	0	0
mix_6247_5	0	0	0	0	0	2	0
mix_9442_1	0	0	9	0	0	0	0
mix_4790_1	0	0	0	2	0	1	0
mix_5790_2	0	12	0	1	0	0	0
mix_13945_1	0	0	0	0	0	0	8
mix_6815_8	0	0	0	1	0	0	0
mix_1165_1	0	0	0	0	0	5	6
mix_9510_1	0	0	0	0	0	7	0
mix_3005_4	0	0	0	1	0	1	0
mix_959_1	0	0	0	0	0	0	8
mix_16768_1	0	0	0	0	0	0	13
mix_15363_1	0	27	0	24	0	7	0
mix_11007_1	0	0	0	0	0	1	0
mix_22923_1	0	1	0	0	0	0	0
mix_8249_1	0	0	16	0	0	0	0
mix_1831_1	0	0	0	12	0	3	0
mix_3113_1	0	0	0	0	0	7	0
mix_2344_1	0	0	19	0	0	0	0
mix_477_4	0	0	1	1	0	0	1
mix_11342_1	0	0	1	0	0	0	2
mix_22169_1	0	0	0	0	1	0	13
mix_21477_1	0	0	0	0	0	4	1
mix_2152_2	0	0	0	1	31	0	0
mix_545_2	0	0	0	1	0	0	0
mix_6374_2	0	0	0	2	0	0	0
mix_410_1	0	0	0	0	0	3	0
mix_6374_13	0	0	0	0	0	1	0
mix_10504_1	0	0	0	0	0	1	0
mix_17611_2	0	0	0	1	29	0	0
mix_1689_1	0	0	0	0	0	0	1
mix_393_1	0	0	0	1	0	0	0
mix_3173_3	0	0	0	0	14	0	0
mix_4851_7	0	0	0	0	0	1	0
mix_21992_2	0	0	0	0	20	0	0
mix_18988_3	0	11	5	8	20	2	1
mix_19265_1	0	0	0	0	2	0	0
mix_8275_1	0	0	0	0	20	0	0
mix_5019_3	0	0	32	0	0	0	1
mix_13935_1	0	0	0	0	0	0	22
mix_5773_6	0	14	0	0	0	0	0
mix_740_1	0	0	0	0	23	0	0
mix_3270_1	0	0	0.5	0	0	0.5	0
mix_5067_1	0	8	11	0	13	6	0
mix_14647_1	0	17	0	0	0	0	0
mix_3364_3	0	0	0	1	0	0	1
mix_99_1	0	0	0	0	1	0	0
mix_22287_2	0	0	0	0	0	1	0
mix_20195_1	0	20	0	0	0	0	0
mix_1779_2	0	0	22	0	0	0	0
mix_2115_7	0	0	0	1	0	0	1
mix_6074_1	0	0	0	6	0	0	18
mix_22978_1	0	1	0	0	0	0	0
mix_2228_2	0	10	0	0	0	0	0
mix_4511_1	0	0	0	13	0	0	0
mix_17963_1	0	0	14	0	0	0	0
mix_7219_1	0	0	0	0	0	0	1
mix_3068_1	0	15	0	4	0	0	0
mix_22187_2	0	0	0	0	0	0	1
mix_7942_1	0	0	50	1337	16	1901	413
mix_19332_1	0	0	0	0	0	1	0
mix_3249_1	0	0	0	0	37	0	0
mix_16713_1	0	0	0	3	0	0	0
mix_15482_1	0	25	0	0	0	0	0
mix_2143_3	0	0	0	0	0	0	1
mix_3219_3	0	15	0	0	0	0	0
mix_336_1	0	0	22	0	0	8	0
mix_18668_1	0	0	0	0	0	0	11
mix_13334_1	0	0	0	0	16	0	0
mix_477_24	0	0	0	0	0	1	1
mix_1303_2	0	0	0	0	21	0	0
mix_21745_1	0	17	0	0	0	0	0
mix_10880_1	0	0	0	0	0	7	0
mix_10699_1	0	12	0	0	0	0	0
mix_923_1	0	9	17	0	2	2	1
mix_9056_1	0	41	0	6	0	0	0
mix_21719_1	0	0	15	0	0	0	0
mix_3486_13	0	0	0	0	0	0	1
mix_5394_3	0	29	17	70	18	9	0
mix_23693_1	0	28	0	0	0	0	0
mix_19066_3	0	0	0	0	70	10	0
mix_666_1	0	0	0	5	0	0	0
mix_17355_1	0	0	0	0	0	0	17
mix_11601_1	0	0	0	5	0	0	0
mix_2407_6	0	0	0	0	0	0	6
mix_13206_1	0	0	0	0	8	0	1
mix_19149_1	0	13	0	1	0	0	0
mix_16425_2	0	0	0	0	41	1	0
mix_5110_2	0	0	28	0	0	0	0
mix_4395_7	0	7	0	0	0	0	0
mix_2727_2	0	0	0	2	0	1	0
mix_16762_1	0	0	0	7	0	0	0
mix_4966_1	0	0	0	0	0	6	1
mix_4859_2	0	17	0	0	0	0	0
mix_5251_2	0	0	0	0	0	1	1
mix_19060_1	0	0	15	0	0	0	0
mix_980_3	0	0	0	0	0	1	0
mix_19848_1	0	0	0	0	0	0	1
mix_21_1	0	0	0	0	0	0	1
mix_16163_1	0	0	0	0	14	0	0
mix_10648_1	0	0	0	7	0	0	0
mix_3091_1	0	0	6	0	0	2	0
mix_3009_8	0	0	19	0	28	6	0
mix_6183_1	0	0	0	0	12	0	0
mix_567_1	0	0	0	6	0	3	0
mix_21827_1	0	0	0	0	0	1	0
mix_7212_2	0	0	1	0	1	0	0
mix_19195_1	0	0	0	0	7	0	1
mix_5206_1	0	17	0	0	0	0	0
mix_3186_6	0	0	0	0	0	2	0
mix_10274_1	0	0	0	25	0	1	0
mix_16960_1	0	0	0	6	0	0	0
mix_22015_3	0	1	1	0	21	0	0
mix_4868_5	0	0	7	0	0	0	0
mix_3333_3	0	16	0	30	0	0	0
mix_4682_1	0	0	0	14	0	1	0
mix_5019_14	0	22	0	0	0	0	0
mix_22259_1	0	0	0	1	0	0	0
mix_11047_1	0	23	0	0	0	0	0
mix_8856_1	0	0	4	0	0	0	0
mix_2915_1	0	0	0	6	0	0	0
mix_2018_1	0	0	0	0	0	1	1
mix_7756_1	0	0	0	0	0	1	0
mix_3861_2	0	1	0	0	0	0	0
mix_3009_3	0	0	0	0	0	1	0
mix_4037_1	0	0	0	0	13	0	0
mix_6153_3	0	0	0	0	0	0	1
mix_14125_1	0	0	0	0	0	0	10
mix_2684_1	0	0	0	1	0	0	0
mix_839_1	0	0	0	0	0	0	7
mix_15903_1	0	0	0	0	0	0	16
mix_1124_1	0	8	0	8	0	1	0
mix_12173_1	0	0	0	5	0	0	0
mix_19193_1	0	0	0	5	0	0	0
mix_19646_1	0	0	0	0	0	4	0
mix_8763_2	0	0	0	1	10	1	0
mix_4637_2	0	0	0	8	0	0	0
mix_997_2	0	0	0	0	0	0	17
mix_1598_1	0	0	14	7	0	0	0
mix_1325_1	0	0	0	3	0	0	0
mix_17366_1	0	0	0	0	0	0	16
mix_1952_1	0	17	0	10	0	0	0
mix_3069_1	0	0	0	4	0	0	17
mix_21005_1	0	25	0	0	0	0	0
mix_24178_1	0	0	0	5	0	0	0
mix_7743_4	0	10	0	0	0	11	0
mix_2625_1	0	0	0	9	0	0	0
mix_814_1	0	0	8	0	0	0	1
mix_1628_1	0	0	0	41	3	103	45
mix_22172_1	0	0	0	1	0	0	0
mix_2570_1	0	0	0	2	0	0	0
mix_16158_2	0	0	0	1	0	0	0
mix_14970_1	0	0	0	0	7	0	0
mix_14202_1	0	0	0	7	0	4	0
mix_22015_6	0	0	0	0	17	0	1
mix_5615_1	0	0	0	0	0	0	19
mix_4859_3	0	1	0	0	0	0	0
mix_19491_1	0	0	0	10	0	0	0
mix_2936_1	0	0	0	6	0	0	0
mix_413_1	0	6	0	0	0	0	0
mix_8311_1	0	0	0	0	0	6	0
mix_538_1	0	0	0	0	0	3	0
mix_1945_3	0	0	0	0	1	0	0
mix_13212_1	0	0	0	0	0	1	0
mix_9661_1	0	0	0	0	12	0	0
mix_2760_2	0	0	0	1	0	1	0
mix_6245_5	0	0	0	0	0	0	1
mix_23224_1	0	0	0	0	21	0	0
mix_3045_4	0	1	0	0	0	0	0
mix_95_1	0	0	0	25	0	0	0
mix_682_2	0	0	0	0	0	6	0
mix_11129_1	0	0	0	4	0	0	0
mix_16131_2	0	0	0	0	42	2	0
mix_14096_1	0	0	0	0	16	0	0
mix_3878_1	0	0	0	5	0	9	8
mix_326_1	0	0	0	5	0	0	0
mix_16264_2	1	1	0	3	10	3	0
mix_13207_4	1	6	13	10	1	14	12
mix_5378_1	6	30	0	97	0	8	42
mix_5073_1	8	0	1	24	30	0	29
mix_3284_1	12	202	31	215	74	17	37
mix_13207_5	170	265	745	948	161	1108	653
mix_13207_8	388	716	2120	2310	353	2924	1685
mix_13207_2	599	1102	2613	3331	548	4129	2269
mix_13207_3	1508	2550	6643	7820	1320	10071	5681
mix_13207_7	1717	2905	7666	8999	1510	11724	6531

## Sheet: Supplementary Table S7
Supplementary Table S7 Microbial composition of metagenome in fetal gut
Phylum_	relative abundance		Genus	relative abundance		Species	relative abundance
p__Proteobacteria	0.952972		g__Escherichia	0.887625		s__Escherichia_coli	0.868851
p__Firmicutes	0.041336		g__Catellicoccus	0.0419458		s__Catellicoccus_marimammalium	0.0410854
p__Actinobacteria	0.00533187		g__Bradyrhizobium	0.0193158		s__phagocytophilum_group	0.019766
p__Thaumarchaeota	0.00016297		g__Salmonella	0.0149656		s__Salmonella_enterica	0.0146674
			g__Neisseria	0.0127675		s__Bradyrhizobium_sp._DFCI-1	0.0128677
			g__Streptococcus	0.00591149		s__Neisseria_subflava	0.0122743
			g__Helicobacter	0.00535911		s__Streptococcus_pneumoniae	0.00579245
			g__Mycolicibacterium	0.00340662		s__Helicobacter_pylori	0.0052498
			g__Citrobacter	0.00233691		s__Mycolicibacterium_malmesburyense	0.00333556
			g__Enterococcus	0.000839195		s__Bradyrhizobium_elkanii	0.00304585
			g__Streptomyces	0.000732441		s__Acinetobacter_johnsonii	0.00247868
			g__Shigella	0.00073233		s__Escherichia_albertii	0.00138315
			g__Enterobacter	0.000713096		s__Citrobacter_freundii_complex	0.000955992
			g__Burkholderia	0.000634583		s__Enterococcus_faecium	0.000821844
			g__Corallococcus	0.000498175		s__Streptomyces_sp._CNY243	0.000718466
			g__Afipia	0.000455836		s__Enterobacter_cloacae_complex	0.000699323
			g__Cutibacterium	0.000406085		s__Bradyrhizobium_embrapense	0.000697208
			g__Klebsiella	0.000332924		s__Bradyrhizobium_japonicum	0.000620143
			g__Nonomuraea	0.000310459		s__pseudomallei_group	0.000605723
			g__Lachnoclostridium	0.000280383		s__Citrobacter_amalonaticus	0.000544083
			g__Xenorhabdus	0.000257778		s__Bradyrhizobium_tropiciagri	0.000539478
			g__Acinetobacter	0.000253463		s__Corallococcus_coralloides	0.000486848
			g__Dickeya	0.000236489		s__Citrobacter_koseri	0.000399036
			g__CandidatusNitrosocosmicus	0.000201417		s__Cutibacterium_acnes	0.000397582
			g__Clostridium	0.000188957		s__Bradyrhizobium_pachyrhizi	0.000345042
			g__Haemophilus	0.000167694		s__Bradyrhizobium_viridifuturi	0.000343271
			g__Cronobacter	0.000156077		s__Bradyrhizobium_sp._BTAi1	0.000338553
			g__Rhodoplanes	0.000152271		s__Klebsiella_oxytoca	0.000326218
			g__Siccibacter	0.000150077		s__Neisseria_polysaccharea	0.000306355
			g__Methylocystis	0.000127709		s__Nonomuraea_coxensis	0.000303991
			g__Mycobacterium	0.000107819		s__Shigella_sonnei	0.000296667
			g__Marinobacter	0.000107819		s__Clostridium_symbiosum	0.000274707
			g__Rhizobium	8.46689e-05		s__Shigella_dysenteriae	0.000262213
						s__Xenorhabdus_poinarii	0.000252436
						s__Dickeya_solani	0.00023197
						s__Shigella_boydii	0.000213485
						s__Shigella_flexneri	0.000208436
						s__Candidatus_Nitrocosmicus_oleophilus	0.000197044
						s__Haemophilus_haemolyticus	0.000164211
						s__Escherichia_fergusonii	0.00015423
						s__Cronobacter_dublinensis	0.000153283
						s__Rhodoplanes_sp._Z2-YC6860	0.000149538
						s__Siccibacter_colletis	0.000147232
						s__Escherichia_sp._TW09308	0.000142008
						s__Methylocystis_sp._ATCC_49242	0.000125548
						s__Clostridium_saccharoperbutylacetonicum	0.000110737
						s__uncultured_bacterium	0.000107216
						s__Afipia_sp._P52-10	0.000105796
						s__Marinobacter_hydrocarbonoclasticus	0.000105796
						s__Rhizobium_leguminosarum	8.32258e-05

## Sheet: Supplementary Table S8
Supplementary Table S8 Antibiotic resistance genes detected in fetal gut
Resistance_Type	Description	Resistance_Profile	Tax	Accession	geneID
AxyY	AxyY is the periplasmic adaptor protein of the AxyXY-OprZ efflux pump system in Achromobacter spp.	AxyY	Achromobacter insuavis AXX-A	ARO:3004144	k141_63461_1
H-NS	H-NS is a histone-like protein involved in global gene regulation in Gram-negative bacteria. It is a repressor of the membrane fusion protein genes acrE, mdtE, and emrK as well as nearby genes of many RND-type multidrug exporters.	H-NS	Escherichia coli O157:H7 str. Sakai	ARO:3000676	k141_21985_8
Pseudomonas	CpxR is directly involved in activation of expression of RND efflux pump MexAB-OprM in P. aeruginosa. CpxR is required to enhance mexAB-oprM expression and drug resistance, in the absence of repressor MexR.	Pseudomonas aeruginosa CpxR	Pseudomonas aeruginosa	ARO:3004054	k141_57184_2
Escherichia	Multidrug efflux pump in E. coli. This multidrug efflux system was originally identified as the Cmr/CmlA chloramphenicol exporter.	Escherichia coli mdfA	Escherichia coli	ARO:3001328	k141_15542_42
Bifidobacterium	Bifidobacterium are antibiotic resistant probiotics are prescribed to upkeep the population beneficial bacteria in the gut microbiome. However, horizontal gene transfer among gut microbes could create harmful antibiotic-resistant pathogenic bacteria, such as Mycobacterium tuberculosis. Lokesh et al. analyzed Bifidobacterium antitubercular drug resistance and mutations in rpoβ. They found that B. …	Bifidobacterium adolescentis rpoB mutants conferring resistance to rifampicin	Bifidobacterium adolescentis ATCC 15703	ARO:3004480	k141_39972_1
mdtG	The MdtG protein, also named YceE, appears to be a member of the major facilitator superfamily of transporters, and it has been reported, when overexpressed, to increase fosfomycin and deoxycholate resistances. mdtG is a member of the marA-soxS-rob regulon.	mdtG	Escherichia coli O139:H28 str. E24377A	ARO:3001329	k141_74888_20
bacA	bacA is a gene that recycles undecaprenyl pyrophosphate during cell wall biosynthesis which confers resistance to bacitracin	bacA	Escherichia coli str. K-12 substr. MG1655	ARO:3002986	k141_13754_1
MuxB	MuxB is one of the two necessary RND components in the Pseudomonas aeruginosa efflux pump system MuxABC-OpmB.	MuxB	Pseudomonas aeruginosa PAO1	ARO:3004074	k141_853_1
ugd	PmrE is required for the synthesis and transfer of 4-amino-4-deoxy-L-arabinose (Ara4N) to Lipid A, which allows gram-negative bacteria to resist the antimicrobial activity of cationic antimicrobial peptides and antibiotics such as polymyxin	ugd	Escherichia coli str. K-12 substr. MG1655	ARO:3003577	k141_101575_3
mdtM	Multidrug resistance protein MdtM	mdtM	Escherichia coli str. K-12 substr. MG1655	ARO:3001214	k141_29295_41
gadX	GadX is an AraC-family regulator that promotes mdtEF expression to confer multidrug resistance.	gadX	Escherichia coli str. K-12 substr. W3110	ARO:3000508	k141_90687_2
mdtF	MdtF is the multidrug inner membrane transporter for the MdtEF-TolC efflux complex.	mdtF	Escherichia coli str. K-12 substr. MG1655	ARO:3000796	k141_90687_4
mdtE	MdtE is the membrane fusion protein of the MdtEF multidrug efflux complex. It shares 70% sequence similarity with AcrA.	mdtE	Escherichia coli str. K-12 substr. W3110	ARO:3000795	k141_90687_6
pmrF	PmrF is required for the synthesis and transfer of 4-amino-4-deoxy-L-arabinose (Ara4N) to Lipid A, which allows gram-negative bacteria to resist the antimicrobial activity of cationic antimicrobial peptides and antibiotics such as polymyxin. pmrF corresponds to 1 locus in Pseudomonas aeruginosa PAO1 and 1 locus in Pseudomonas aeruginosa LESB58.	PmrF	Escherichia coli str. K-12 substr. MG1655	ARO:3003578	k141_87945_140
Nocardia	Due to gene duplication, the genomes of Nocardia species include both rifampin-sensitive beta-subunit of RNA polymerase (rpoB) and rifampin-resistant beta-subunit of RNA polymerase (rpoB2) genes, with ~88% similarity between the two gene products. Expression of the rpoB2 variant results in replacement of rifampin sensitivity with rifampin resistance.	rpoB2	Nocardia farcinica IFM 10152	ARO:3000501	k141_102523_1
acrE	AcrE is a membrane fusion protein, similar to AcrA.	AcrE	Escherichia coli str. K-12 substr. MG1655	ARO:3000499	k141_67129_9
acrS	AcrS is a repressor of the AcrAB efflux complex and is associated with the expression of AcrEF. AcrS is believed to regulate a switch between AcrAB and AcrEF efflux.	AcrS	Escherichia coli str. K-12 substr. MG1655	ARO:3000656	k141_67129_10
baeS	BaeS is a sensor kinase in the BaeSR regulatory system. While it phosphorylates BaeR to increase its activity, BaeS is not necessary for overexpressed BaeR to confer resistance.	baeS	Escherichia coli str. K-12 substr. W3110	ARO:3000829	k141_10538_9
mdtA	MdtA is the membrane fusion protein of the multidrug efflux complex mdtABC.	mdtA	Escherichia coli str. K-12 substr. MG1655	ARO:3000792	k141_10538_13
mdtO	Multidrug resistance efflux pump. Could be involved in resistance to puromycin, acriflavine and tetraphenylarsonium chloride	mdtO	Escherichia coli str. K-12 substr. W3110	ARO:3003549	k141_8480_5
Escherichia	A class C ampC beta-lactamase (cephalosporinase) enzyme described in Escherichia coli shown clinically to confer resistance to penicillin-like and cephalosporin-class antibiotics.	Escherichia coli ampC beta-lactamase	Escherichia coli str. K-12 substr. MG1655	ARO:3004290	k141_8480_77

## Sheet: Supplementary Table S9
Supplementary Table S9 Microbial composition of metatranscriptome in fetal gut
Phylum_	relative abundance		Genus	relative abundance		Species	relative abundance
p__Proteobacteria	0.947531		g__Escherichia	0.642305		s__Escherichia_coli	0.641398
p__Actinobacteria	0.0273639		g__Salmonella	0.155063		s__Salmonella_enterica	0.155953
p__Firmicutes	0.0168765		g__Pseudomonas	0.12562		s__Pseudomonas_fluorescens_group	0.0737503
p__Bacteroidetes	0.00671344		g__Mycobacterium	0.00558235		s__Pseudomonas_antarctica	0.0205855
			g__Enterobacter	0.00541564		s__Pseudomonas_syringae_group	0.010178
			g__Roseobacter	0.00498208		s__Actinomyces_odontolyticus	0.00196927
			g__Staphylococcus	0.00479126		s__Mycobacterium_tuberculosis_complex	0.00564153
			g__Shigella	0.00463943		s__Roseobacter_sp._AzwK-3b	0.00502889
			g__Klebsiella	0.00444281		s__Enterobacter_cloacae_complex	0.00546901
			g__Clostridium	0.00436902		s__Staphylococcus_aureus	0.00581337
			g__Kocuria	0.00384826		s__Pseudomonas_sp._RIT-PI-r	0.00737856
			g__Bradyrhizobium	0.0037196		s__Klebsiella_pneumoniae	0.00411047
			g__Paenibacillus	0.00334369		s__Cutibacterium_acnes	0.00354028
			g__Cronobacter	0.00305171		s__Kocuria_sp._UCD-OTCP	0.00388449
			g__Cutibacterium	0.00294992		s__Pseudomonas_sp._Ant30-3	0.00209255
			g__Actinomyces	0.00252917		s__Clostridium_botulinum	0.00356325
			g__Corynebacterium	0.00244069		s__Pseudomonas_sp._RIT288	0.00317711
			g__Citrobacter	0.00235928		s__Citrobacter_amalonaticus	0.00316673
			g__Bacteroides	0.00215454		s__Cronobacter_malonaticus	0.00305325
			g__Streptococcus	0.00188099		s__Escherichia_fergusonii	0.00300918
			g__Brucella	0.00149337		s__Shigella_flexneri	0.00288764
			g__Burkholderia	0.00116083		s__Bradyrhizobium_sp._S23321	0.00186596
			g__Acinetobacter	0.00105311		s__Bradyrhizobium_sp._DFCI-1	0.00215257
			g__Streptomyces	0.000775339		s__Brucella_abortus	0.00150687
			g__Pseudescherichia	0.000267423		s__Shigella_sonnei	0.00205826
			g__Modestobacter	0.00010961		s__Pseudomonas_simiae	0.00197298
						s__Citrobacter_freundii_complex	0.000317778
						s__Streptococcus_pneumoniae	0.00134201
						s__Escherichia_albertii	0.00146535
						s__pseudomallei_group	0.000302917
						s__Pseudescherichia_vulneris	0.000267677

[truncated: 10 more sheets: Supplementary Table S10, Supplementary Table S11, Supplementary Table S12, Supplementary Table S13, Supplementary Table S14, Supplementary Table S15, Supplementary Table S16, Supplementary Table S17, Supplementary Table S18, Supplementary Table S19]
